# Supplementary material
Source: PubMed Central journal article supplement (PMC5334196)
Supplement: 11302_2016_9536_MOESM2_ESM.pdf [file 11302_2016_9536_MOESM2_ESM.pdf]

**Supplementary Table S1: RT-qPCR primer sequences for validated targets**

| <b>Gene Symbol</b>           | <b>Gene Name</b>                                                   | <b>Entrez Accession No.</b> | <b>Forward primer (5'-3')</b> | <b>Reverse primer (5'-3')</b> |
|------------------------------|--------------------------------------------------------------------|-----------------------------|-------------------------------|-------------------------------|
| <b>Reference Gene</b>        |                                                                    |                             |                               |                               |
| <i>Actb</i>                  | actin, beta                                                        | 11461                       | ACCAACTGGGACGATATGGAGAAGA     | TACGACCAGAGGCATACAGGGACAA     |
| <b>Adenosine Receptors</b>   |                                                                    |                             |                               |                               |
| <i>Adora1</i>                | adenosine A1 receptor                                              | 11539                       | ATCCCTCTCCGGTACAAGACAGT       | ACTCAGGTTGTTCCAGCCAAAC        |
| <i>Adora2a</i>               | adenosine A2a receptor                                             | 11540                       | CCTCACGCAGAGTTCCATCTT         | TGTACCGGAGTGGAAATTCGG         |
| <i>Adora2b</i>               | adenosine A2b receptor                                             | 11541                       | TCTTCCTCGCCTGCCTTCGT          | CCAGTGACCAAACCTTTATACCTGA     |
| <i>Adora3</i>                | adenosine A3 receptor                                              | 11542                       | ACTTCTATGCCTGCCTTTTCATGT      | AACCGTTCTATATCTGACTGTCAGCTT   |
| <b>Microarray Validation</b> |                                                                    |                             |                               |                               |
| <i>Acta1</i>                 | actin, alpha 1, skeletal muscle                                    | 11459                       | CTCTTCCAGCCTTCCTTTATCG        | GCATACAGGTCCTTCCTGATGTC       |
| <i>Adipoq</i>                | adiponectin, C1Q and collagen domain containing                    | 11450                       | AGATGCAGGTCTTCTTGGT           | GAGCGATACACATAAGCGG           |
| <i>Car3</i>                  | carbonic anhydrase 3                                               | 12350                       | GGTTCACTGGAATCCAAAGTATAACAC   | CCTTTCTCCCGTCCTATCTTCA        |
| <i>Cidec</i>                 | cell death-inducing DFFA-like effector c                           | 14311                       | CCATCAGAACAGCGCAAGAA          | TTCAGCTTGTACAGGTCGAAGGT       |
| <i>Dbp</i>                   | D site albumin promoter binding protein                            | 13170                       | CGCGCAGGCTTGACATCT            | GCGGGATCAGGTTCAAAGGT          |
| <i>Il6</i>                   | interleukin 6                                                      | 16193                       | AAGCCAGAGTCCTTCAGAG           | TTATCTGTTAGGAGAGCATTGG        |
| <i>Lcn2</i>                  | lipocalin 2                                                        | 16819                       | AAATATGCACAGGTATCCTCAG        | CTCCTTGGTTCTTCCATACAG         |
| <i>Mapk8</i>                 | mitogen-activated protein kinase 8                                 | 26419                       | AAGCCCCACCACCAAAGATC          | TCCTCCAAATCCATTACCTCCTT       |
| <i>Stat1</i>                 | signal transducer and activator of transcription 1                 | 20846                       | GACCAAAGGAAGCACCAG            | TCAGACACAGAAATCAACTCAG        |
| <i>Trpm7</i>                 | transient receptor potential cation channel, subfamily M, member 7 | 58800                       | CTCTTCACTCGGTGCAAGCA          | ATCTCGTAACCAATCCGGTAACAA      |
| <i>Txnip</i>                 | thioredoxin interacting protein                                    | 56338                       | CTGTGAAGGTGATGACATCTCCAT      | GCCATTGGCAAGGTAAGTGTGT        |

**TABLE S2: Canonical pathways modified by A2AR KO**

| <b>Ingenuity Canonical Pathways</b>                                | <b>-log(p-value)</b> | <b>Ratio</b> | <b>Molecules</b>             |
|--------------------------------------------------------------------|----------------------|--------------|------------------------------|
| Relaxin Signaling                                                  | 2.45E00              | 1.99E-02     | GNB1, PRKAR2B, PDE3B         |
| Cardiac $\beta$ -adrenergic Signaling                              | 2.45E00              | 2.11E-02     | GNB1, PRKAR2B, PDE3B         |
| Cellular Effects of Sildenafil (Viagra)                            | 2.4E00               | 1.99E-02     | PRKAR2B, PDE3B, ACTA1        |
| Protein Kinase A Signaling                                         | 2.22E00              | 1.26E-02     | GNB1, PRKAR2B, PDE3B, NFATC2 |
| Phototransduction Pathway                                          | 2.22E00              | 3.08E-02     | GNB1, PRKAR2B                |
| Germ Cell-Sertoli Cell Junction Signaling                          | 2.2E00               | 1.88E-02     | IQQAP1, ACTA1, MAP3K2        |
| Calcium Signaling                                                  | 2.06E00              | 1.47E-02     | PRKAR2B, NFATC2, ACTA1       |
| Glutamate Receptor Signaling                                       | 2.02E00              | 2.86E-02     | GNB1, SLC38A1                |
| Caveolar-mediated Endocytosis Signaling                            | 1.85E00              | 2.35E-02     | ACTA1, MAP3K2                |
| Nitric Oxide Signaling in the Cardiovascular System                | 1.83E00              | 2.02E-02     | PRKAR2B, PDE3B               |
| Leptin Signaling in Obesity                                        | 1.81E00              | 2.38E-02     | PRKAR2B, PDE3B               |
| Cardiac Hypertrophy Signaling                                      | 1.75E00              | 1.22E-02     | GNB1, PRKAR2B, MAP3K2        |
| TR/RXR Activation                                                  | 1.68E00              | 2.02E-02     | HP, PDE3B                    |
| SAPK/JNK Signaling                                                 | 1.67E00              | 1.98E-02     | GNB1, MAP3K2                 |
| Colorectal Cancer Metastasis Signaling                             | 1.67E00              | 1.17E-02     | GNB1, PRKAR2B, PTGER3        |
| $\alpha$ -Adrenergic Signaling                                     | 1.66E00              | 1.89E-02     | GNB1, PRKAR2B                |
| RANK Signaling in Osteoclasts                                      | 1.66E00              | 2.04E-02     | NFATC2, MAP3K2               |
| G Beta Gamma Signaling                                             | 1.65E00              | 1.68E-02     | GNB1, PRKAR2B                |
| IL-1 Signaling                                                     | 1.64E00              | 1.89E-02     | GNB1, PRKAR2B                |
| fMLP Signaling in Neutrophils                                      | 1.53E00              | 1.57E-02     | GNB1, NFATC2                 |
| PKC $\delta$ Signaling in T Lymphocytes                            | 1.5E00               | 1.42E-02     | NFATC2, MAP3K2               |
| Androgen Signaling                                                 | 1.48E00              | 1.39E-02     | GNB1, PRKAR2B                |
| P2Y Purigenic Receptor Signaling Pathway                           | 1.45E00              | 1.47E-02     | GNB1, PRKAR2B                |
| GNRH Signaling                                                     | 1.42E00              | 1.39E-02     | PRKAR2B, MAP3K2              |
| Insulin Receptor Signaling                                         | 1.37E00              | 1.41E-02     | PRKAR2B, PDE3B               |
| B Cell Receptor Signaling                                          | 1.29E00              | 1.28E-02     | NFATC2, MAP3K2               |
| One Carbon Pool by Folate                                          | 1.29E00              | 2.56E-02     | MTR                          |
| cAMP-mediated Signaling                                            | 1.25E00              | 1.24E-02     | PRKAR2B, PDE3B               |
| Tight Junction Signaling                                           | 1.24E00              | 1.2E-02      | PRKAR2B, ACTA1               |
| Axonal Guidance Signaling                                          | 1.18E00              | 7.37E-03     | GNB1, PRKAR2B, NFATC2        |
| Role of NFAT in Regulation of the Immune Response                  | 1.17E00              | 9.9E-03      | GNB1, NFATC2                 |
| CREB Signaling in Neurons                                          | 1.17E00              | 1.01E-02     | GNB1, PRKAR2B                |
| Sonic Hedgehog Signaling                                           | 1.16E00              | 3.03E-02     | PRKAR2B                      |
| Methionine Metabolism                                              | 1.12E00              | 1.25E-02     | MTR                          |
| Role of NFAT in Cardiac Hypertrophy                                | 1.1E00               | 9.57E-03     | GNB1, PRKAR2B                |
| G Protein Signaling Mediated by Tubby                              | 1.09E00              | 2.44E-02     | GNB1                         |
| Breast Cancer Regulation by Stathmin1                              | 1.09E00              | 9.95E-03     | GNB1, PRKAR2B                |
| Neuroprotective Role of THOP1 in Alzheimer's Disease               | 1.05E00              | 1.85E-02     | PRKAR2B                      |
| G-Protein Coupled Receptor Signaling                               | 1.04E00              | 9.01E-03     | PRKAR2B, PDE3B               |
| Mechanisms of Viral Exit from Host Cells                           | 1.03E00              | 2.27E-02     | ACTA1                        |
| April Mediated Signaling                                           | 1.03E00              | 2.38E-02     | NFATC2                       |
| B Cell Activating Factor Signaling                                 | 1.01E00              | 2.27E-02     | NFATC2                       |
| Actin Cytoskeleton Signaling                                       | 1.01E00              | 8.44E-03     | IQQAP1, ACTA1                |
| MSP-RON Signaling Pathway                                          | 9.77E-01             | 2E-02        | ACTA1                        |
| Role of Osteoblasts, Osteoclasts and Chondrocytes in Rheumatoid    | 9.7E-01              | 8.47E-03     | CTSK, NFATC2                 |
| Phospholipase C Signaling                                          | 9.57E-01             | 7.81E-03     | GNB1, NFATC2                 |
| CD27 Signaling in Lymphocytes                                      | 9.22E-01             | 1.75E-02     | MAP3K2                       |
| Nur77 Signaling in T Lymphocytes                                   | 9.22E-01             | 1.56E-02     | MAP3K2                       |
| Amyloid Processing                                                 | 8.97E-01             | 1.69E-02     | PRKAR2B                      |
| Calcium-induced T Lymphocyte Apoptosis                             | 8.67E-01             | 1.43E-02     | NFATC2                       |
| PXR/RXR Activation                                                 | 8.31E-01             | 1.1E-02      | PRKAR2B                      |
| ERK5 Signaling                                                     | 8.25E-01             | 1.41E-02     | MAP3K2                       |
| CCR5 Signaling in Macrophages                                      | 8.18E-01             | 1.08E-02     | GNB1                         |
| Eicosanoid Signaling                                               | 8.18E-01             | 1.2E-02      | PTGER3                       |
| Melatonin Signaling                                                | 8.06E-01             | 1.3E-02      | PRKAR2B                      |
| IL-4 Signaling                                                     | 7.99E-01             | 1.33E-02     | NFATC2                       |
| Aggrin Interactions at Neuromuscular Junction                      | 7.93E-01             | 1.45E-02     | ACTA1                        |
| Aminosugars Metabolism                                             | 7.93E-01             | 8.26E-03     | PDE3B                        |
| Role of Pattern Recognition Receptors in Recognition of Bacteria a | 7.87E-01             | 1.22E-02     | TICAM1                       |
| Antiproliferative Role of Somatostatin Receptor 2                  | 7.87E-01             | 1.25E-02     | GNB1                         |
| BMP signaling pathway                                              | 7.7E-01              | 1.25E-02     | PRKAR2B                      |
| Crosstalk between Dendritic Cells and Natural Killer Cells         | 7.64E-01             | 1.02E-02     | ACTA1                        |
| Dopamine Receptor Signaling                                        | 7.64E-01             | 1.08E-02     | PRKAR2B                      |
| Regulation of Actin-based Motility by Rho                          | 7.22E-01             | 1.09E-02     | ACTA1                        |
| Regulation of IL-2 Expression in Activated and Anergic T Lymphocy  | 7.22E-01             | 1.11E-02     | NFATC2                       |
| Role of Macrophages, Fibroblasts and Endothelial Cells in Rheuma   | 7.17E-01             | 5.57E-03     | HP, NFATC2                   |
| Melanocyte Development and Pigmentation Signaling                  | 7.13E-01             | 1.11E-02     | PRKAR2B                      |
| Virus Entry via Endocytic Pathways                                 | 7.03E-01             | 1.02E-02     | ACTA1                        |
| VEGF Signaling                                                     | 7.03E-01             | 1.01E-02     | ACTA1                        |
| FXR/RXR Activation                                                 | 6.98E-01             | 9.71E-03     | PON1                         |
| CDK5 Signaling                                                     | 6.98E-01             | 1.06E-02     | PRKAR2B                      |
| FAK Signaling                                                      | 6.89E-01             | 9.8E-03      | ACTA1                        |
| Fcy Receptor-mediated Phagocytosis in Macrophages and Monocy       | 6.8E-01              | 9.9E-03      | ACTA1                        |
| IGF-1 Signaling                                                    | 6.8E-01              | 9.8E-03      | PRKAR2B                      |
| Glycerolipid Metabolism                                            | 6.72E-01             | 6.41E-03     | DGAT1                        |
| Neuropathic Pain Signaling In Dorsal Horn Neurons                  | 6.59E-01             | 9.52E-03     | PRKAR2B                      |
| T Cell Receptor Signaling                                          | 6.59E-01             | 9.17E-03     | NFATC2                       |
| HGF Signaling                                                      | 6.51E-01             | 9.52E-03     | MAP3K2                       |
| Rac Signaling                                                      | 6.31E-01             | 8.06E-03     | IQQAP1                       |
| Synaptic Long Term Potentiation                                    | 6.28E-01             | 8.85E-03     | PRKAR2B                      |
| iCOS-iCOSL Signaling in T Helper Cells                             | 6.28E-01             | 8.06E-03     | NFATC2                       |
| Renin-Angiotensin Signaling                                        | 6.24E-01             | 8.2E-03      | PRKAR2B                      |
| Systemic Lupus Erythematosus Signaling                             | 6.24E-01             | 6.13E-03     | NFATC2                       |
| RhoA Signaling                                                     | 6.2E-01              | 9.09E-03     | ACTA1                        |
| Corticotropin Releasing Hormone Signaling                          | 6.13E-01             | 7.35E-03     | PRKAR2B                      |
| CCR3 Signaling in Eosinophils                                      | 6.02E-01             | 8.2E-03      | GNB1                         |
| CD28 Signaling in T Helper Cells                                   | 5.95E-01             | 7.46E-03     | NFATC2                       |
| Hepatic Cholestasis                                                | 5.57E-01             | 6.06E-03     | PRKAR2B                      |
| Cdc42 Signaling                                                    | 5.54E-01             | 5.59E-03     | IQQAP1                       |
| Oxidative Phosphorylation                                          | 5.54E-01             | 6.06E-03     | PPA1                         |
| AMPK Signaling                                                     | 5.45E-01             | 5.99E-03     | PRKAR2B                      |
| Ovarian Cancer Signaling                                           | 5.42E-01             | 7.04E-03     | PRKAR2B                      |
| PI3K Signaling in B Lymphocytes                                    | 5.33E-01             | 6.8E-03      | NFATC2                       |
| CXCR4 Signaling                                                    | 4.87E-01             | 5.92E-03     | GNB1                         |
| Production of Nitric Oxide and Reactive Oxygen Species in Macrop   | 4.87E-01             | 5.35E-03     | MAP3K2                       |
| Clathrin-mediated Endocytosis Signaling                            | 4.82E-01             | 5.92E-03     | ACTA1                        |
| PPAR $\alpha$ /RXR $\alpha$ Activation                             | 4.72E-01             | 5.56E-03     | PRKAR2B                      |
| RAR Activation                                                     | 4.61E-01             | 5.52E-03     | PRKAR2B                      |
| IL-8 Signaling                                                     | 4.61E-01             | 5.32E-03     | GNB1                         |
| Acute Phase Response Signaling                                     | 4.57E-01             | 5.62E-03     | HP                           |
| NRF2-mediated Oxidative Stress Response                            | 4.5E-01              | 5.41E-03     | ACTA1                        |
| ILK Signaling                                                      | 4.48E-01             | 5.32E-03     | ACTA1                        |
| Ephrin Receptor Signaling                                          | 4.42E-01             | 5.05E-03     | GNB1                         |
| Leukocyte Extravasation Signaling                                  | 4.4E-01              | 5.1E-03      | ACTA1                        |
| ERK/MAPK Signaling                                                 | 4.36E-01             | 5.13E-03     | PRKAR2B                      |
| Integrin Signaling                                                 | 4.16E-01             | 4.9E-03      | ACTA1                        |
| Thrombin Signaling                                                 | 4.13E-01             | 4.85E-03     | GNB1                         |
| Huntington's Disease Signaling                                     | 3.75E-01             | 4.13E-03     | GNB1                         |
| Glucocorticoid Receptor Signaling                                  | 3.28E-01             | 3.55E-03     | NFATC2                       |
| Xenobiotic Metabolism Signaling                                    | 3.27E-01             | 3.38E-03     | MAP3K2                       |
| Purine Metabolism                                                  | 2.66E-01             | 2.28E-03     | PDE3B                        |
| Molecular Mechanisms of Cancer                                     | 2.37E-01             | 2.67E-03     | PRKAR2B                      |

**TABLE S3: Biological functions modified by A2AR KO**

| <u>Category</u>                                       | <u>p-value</u>    | <u>Molecules</u>                                                                                    |
|-------------------------------------------------------|-------------------|-----------------------------------------------------------------------------------------------------|
| Cellular Development                                  | 7.34E-04-4.5E-02  | MRAP, CTSK, SACS, PRKAR2B, PTGER3, NFATC2, TSLP, MAP3K2                                             |
| Cellular Growth and Proliferation                     | 7.34E-04-4.01E-02 | MRAP, PPBP, NFATC2, TSLP                                                                            |
| Hematological System Development and Function         | 7.34E-04-4.5E-02  | HP, PTGER3, TICAM1, PPBP, NFATC2, TSLP, MAP3K2                                                      |
| Humoral Immune Response                               | 7.34E-04-4.5E-02  | NFATC2, FMOD, TSLP                                                                                  |
| Cell-To-Cell Signaling and Interaction                | 1.53E-03-4.74E-02 | ANK3, PTGER3, TICAM1, PPBP, NFATC2, IQGAP1, TSLP, MAP3K2                                            |
| Amino Acid Metabolism                                 | 2.55E-03-5.09E-03 | SLC38A1                                                                                             |
| Carbohydrate Metabolism                               | 2.55E-03-4.72E-02 | GNB1, PON1, PPBP, PPA1                                                                              |
| Cell Death                                            | 2.55E-03-4.5E-02  | PPBP, NFATC2, TSLP, MAP3K2                                                                          |
| Cell Morphology                                       | 2.55E-03-3.68E-02 | ANK3, PTGER3, NFATC2, CNPY2, IQGAP1, TSLP                                                           |
| Cellular Assembly and Organization                    | 2.55E-03-4.01E-02 | ANK3, CTSK, NFATC2, FMOD, CNPY2, IQGAP1, ACTA1                                                      |
| Cellular Compromise                                   | 2.55E-03-4.01E-02 | ANK3, HP, CTSK, PTGER3, PPBP                                                                        |
| Cellular Function and Maintenance                     | 2.55E-03-1.52E-02 | HP, PPBP, NFATC2, TSLP, MAP3K2                                                                      |
| Cellular Movement                                     | 2.55E-03-4.58E-02 | GNB1, CTSK, HP, TICAM1, PPBP, NFATC2, IQGAP1, TSLP                                                  |
| Connective Tissue Development and Function            | 2.55E-03-3.02E-02 | CTSK, RPL22, PTGER3, PDE3B, PPBP, CIDEA, NFATC2                                                     |
| Connective Tissue Disorders                           | 2.55E-03-5.09E-03 | NFATC2                                                                                              |
| Developmental Disorder                                | 2.55E-03-2.55E-03 | CTSK                                                                                                |
| Genetic Disorder                                      | 2.55E-03-4.01E-02 | ANK3, CTSK, PTGER3, CIDEA, IQGAP1, TSLP, MRAP, GNB1, PON1, HP, PRKAR2B, PDE3B, NFATC2, DGAT1, ACTA1 |
| Hair and Skin Development and Function                | 2.55E-03-5.09E-03 | PTGER3, DGAT1                                                                                       |
| Immune Cell Trafficking                               | 2.55E-03-3.51E-02 | HP, TICAM1, PPBP, NFATC2, TSLP                                                                      |
| Inflammatory Response                                 | 2.55E-03-4.67E-02 | HP, PTGER3, TICAM1, PPBP, NFATC2, FMOD, TSLP                                                        |
| Lipid Metabolism                                      | 2.55E-03-4.25E-02 | PON1, HP, PDE3B, PPBP, CIDEA, DGAT1                                                                 |
| Molecular Transport                                   | 2.55E-03-4.25E-02 | GNB1, PON1, HP, PDE3B, PTGER3, PPBP, CIDEA, SLC38A1, DGAT1                                          |
| Nervous System Development and Function               | 2.55E-03-3.68E-02 | MRAP, ANK3, NFATC2, IQGAP1, CNPY2                                                                   |
| Neurological Disease                                  | 2.55E-03-3.76E-02 | GNB1, ANK3, PON1, HP, PRKAR2B, PDE3B, NFATC2                                                        |
| Nucleic Acid Metabolism                               | 2.55E-03-2.55E-03 | PPA1                                                                                                |
| Organ Morphology                                      | 2.55E-03-1.02E-02 | NFATC2, DGAT1                                                                                       |
| Skeletal and Muscular Disorders                       | 2.55E-03-7.63E-03 | CTSK, NFATC2, ACTA1                                                                                 |
| Skeletal and Muscular System Development and Function | 2.55E-03-2.77E-02 | CTSK, NFATC2, FMOD, TSLP, ACTA1                                                                     |
| Small Molecule Biochemistry                           | 2.55E-03-4.74E-02 | GNB1, PON1, HP, PDE3B, PPBP, CIDEA, SLC38A1, DGAT1, PPA1                                            |
| Tissue Development                                    | 2.55E-03-2.52E-02 | CTSK, RPL22, PTGER3, FMOD, MAP3K2                                                                   |
| Gastrointestinal Disease                              | 2.6E-03-3.83E-02  | HP, IQGAP1, TSLP                                                                                    |
| Hepatic System Disease                                | 2.6E-03-3.83E-02  | HP, DGAT1, IQGAP1, TSLP                                                                             |
| Organismal Injury and Abnormalities                   | 2.6E-03-4.74E-02  | HP, NFATC2, TSLP                                                                                    |
| Cell Signaling                                        | 2.78E-03-3.34E-02 | GNB1, HP, PTGER3, PPBP                                                                              |
| Organismal Functions                                  | 4.82E-03-2.52E-02 | PTGER3, DGAT1, FMOD                                                                                 |
| Cell-mediated Immune Response                         | 5.09E-03-1.02E-02 | NFATC2, TSLP, MAP3K2                                                                                |
| Embryonic Development                                 | 5.09E-03-1.02E-02 | MRAP, TSLP, MAP3K2                                                                                  |
| Endocrine System Disorders                            | 5.09E-03-3.57E-02 | MRAP, ANK3, PON1, CUX2, SLC05A1, PTGER3, PDE3B, CIDEA, NFATC2, DGAT1, IQGAP1, ELL2                  |
| Hematopoiesis                                         | 5.09E-03-4.5E-02  | NFATC2, TSLP, MAP3K2                                                                                |
| Immunological Disease                                 | 5.09E-03-1.14E-02 | ANK3, PON1, CUX2, HP, SLC05A1, PTGER3, NFATC2, ELL2                                                 |
| Inflammatory Disease                                  | 5.09E-03-4.01E-02 | HP, PTGER3, NFATC2, TSLP                                                                            |
| Lymphoid Tissue Structure and Development             | 5.09E-03-2.77E-02 | PPBP, NFATC2                                                                                        |
| Renal and Urological System Development and Function  | 5.09E-03-5.09E-03 | PTGER3                                                                                              |
| Respiratory Disease                                   | 5.09E-03-4.01E-02 | PTGER3, TSLP                                                                                        |
| Tissue Morphology                                     | 5.09E-03-3.27E-02 | ANK3, CTSK, NFATC2, TSLP                                                                            |
| Organismal Development                                | 7.63E-03-7.63E-03 | FMOD                                                                                                |
| Reproductive System Development and Function          | 7.63E-03-7.63E-03 | PTGER3, DGAT1                                                                                       |
| Respiratory System Development and Function           | 7.63E-03-1.02E-02 | PTGER3                                                                                              |
| Metabolic Disease                                     | 8.75E-03-4.23E-02 | ANK3, PON1, CUX2, SLC05A1, PTGER3, PDE3B, CIDEA, NFATC2, MTR, DGAT1, IQGAP1, ELL2                   |
| Cancer                                                | 1.02E-02-3.83E-02 | HP, IQGAP1, TSLP                                                                                    |
| Cell Cycle                                            | 1.02E-02-3.02E-02 | PDE3B, CIDEA, NFATC2, TSLP                                                                          |
| Tumor Morphology                                      | 1.02E-02-1.02E-02 | IQGAP1                                                                                              |
| Reproductive System Disease                           | 1.13E-02-4.5E-02  | ANK3, PON1, PTGER3, IQGAP1, ELL2                                                                    |
| Behavior                                              | 1.52E-02-1.52E-02 | GNB1                                                                                                |
| Antigen Presentation                                  | 1.77E-02-4.5E-02  | PPBP, FMOD, TSLP                                                                                    |
| Gene Expression                                       | 1.77E-02-4.5E-02  | PRKAR2B, NFATC2, ELL2                                                                               |
| Vitamin and Mineral Metabolism                        | 2.02E-02-3.34E-02 | GNB1, PTGER3, PPBP, DGAT1                                                                           |
| Cardiovascular System Development and Function        | 2.52E-02-2.52E-02 | NFATC2                                                                                              |
| Organ Development                                     | 2.52E-02-2.52E-02 | NFATC2                                                                                              |
| Renal and Urological Disease                          | 3.02E-02-3.02E-02 | PTGER3                                                                                              |
| Cardiovascular Disease                                | 3.17E-02-4.85E-02 | PON1, PDE3B, ACTA1                                                                                  |
| Hypersensitivity Response                             | 3.27E-02-3.27E-02 | TSLP                                                                                                |
| Post-Translational Modification                       | 4.74E-02-4.74E-02 | CTSK                                                                                                |

**TABLE S4 - Genes modified by LPS**

| Gene Symbol                                            | Gene Name                                                                                                            | Affymetrix ID | Fold-Change | %FDR |
|--------------------------------------------------------|----------------------------------------------------------------------------------------------------------------------|---------------|-------------|------|
|                                                        | <b>Up-Regulated</b>                                                                                                  |               |             |      |
| <i>Len2</i>                                            | lipocalin 2                                                                                                          | 1427747 a at  | 590.24      | 0.00 |
| <i>Saa3</i>                                            | serum amyloid A 3                                                                                                    | 1450826 a at  | 515.71      | 0.00 |
| <i>Serpina3n</i>                                       | serine (or cysteine) peptidase inhibitor, clade A, member 3N                                                         | 1419100 at    | 122.38      | 0.00 |
| <i>BC023105</i>                                        | cDNA sequence BC023105                                                                                               | 1425394 at    | 106.76      | 0.00 |
| <i>Cxcl9</i>                                           | chemokine (C-X-C motif) ligand 9                                                                                     | 1418652 at    | 100.82      | 0.00 |
| <i>Cxcl1</i>                                           | chemokine (C-X-C motif) ligand 1                                                                                     | 1419209 at    | 88.95       | 0.00 |
| <i>Serpina3g</i>                                       | serine (or cysteine) peptidase inhibitor, clade A, member 3G                                                         | 1424923 at    | 84.27       | 0.00 |
| <i>Ifit1</i>                                           | interferon-induced protein with tetratricopeptide repeats 1                                                          | 1450783 at    | 83.36       | 0.00 |
| <i>Ifit3</i>                                           | interferon-induced protein with tetratricopeptide repeats 3                                                          | 1449025 at    | 64.03       | 0.00 |
| <i>Cd274</i>                                           | CD274 antigen                                                                                                        | 1419714 at    | 58.61       | 0.00 |
| <i>Mt2</i>                                             | metallothionein 2                                                                                                    | 1428942 at    | 54.18       | 0.00 |
| <i>Cxcl5</i>                                           | chemokine (C-X-C motif) ligand 5                                                                                     | 1419728 at    | 52.40       | 0.00 |
| <i>Mpa2l</i> /// <i>LOC626578</i> /// <i>LOC673101</i> | macrophage activation 2 like /// similar to macrophage activation 2 like /// similar to macrophage activation 2 like | 1438676_at    | 51.37       | 0.00 |
| <i>Herc5</i>                                           | hect domain and RLD 5                                                                                                | 1432026 a at  | 43.64       | 0.00 |
| <i>Cxcl2</i>                                           | chemokine (C-X-C motif) ligand 2                                                                                     | 1449984 at    | 35.84       | 0.00 |
| <i>Igtp</i>                                            | interferon gamma induced GTPase                                                                                      | 1417141 at    | 35.14       | 0.00 |
| <i>Il6</i>                                             | interleukin 6                                                                                                        | 1450297 at    | 34.00       | 0.00 |
| ---                                                    | ---                                                                                                                  | 1458589 at    | 33.74       | 0.00 |
| <i>Usp18</i>                                           | ubiquitin specific peptidase 18                                                                                      | 1418191 at    | 32.49       | 0.00 |
| <i>Cxcl10</i>                                          | chemokine (C-X-C motif) ligand 10                                                                                    | 1418930 at    | 31.12       | 0.00 |
| <i>Ptx3</i>                                            | pentraxin related gene                                                                                               | 1418666 at    | 31.06       | 0.00 |
| <i>Iigp1</i>                                           | interferon inducible GTPase 1                                                                                        | 1419042 at    | 30.81       | 0.00 |
| <i>S100a9</i>                                          | S100 calcium binding protein A9 (calgranulin B)                                                                      | 1448756 at    | 30.15       | 0.00 |
| <i>Irf7</i>                                            | interferon regulatory factor 7                                                                                       | 1417244 a at  | 30.09       | 0.00 |
| <i>Ifit2</i>                                           | interferon-induced protein with tetratricopeptide repeats 2                                                          | 1418293 at    | 30.01       | 0.00 |
| <i>S100a8</i>                                          | S100 calcium binding protein A8 (calgranulin A)                                                                      | 1419394 s at  | 29.33       | 0.00 |
| <i>Iigp2</i>                                           | interferon inducible GTPase 2                                                                                        | 1417793 at    | 29.12       | 0.00 |
| <i>Csf3</i>                                            | colony stimulating factor 3 (granulocyte)                                                                            | 1419427 at    | 27.79       | 0.00 |
| <i>Mpa2l</i> /// <i>LOC626578</i> /// <i>LOC673101</i> | macrophage activation 2 like /// similar to macrophage activation 2 like /// similar to macrophage activation 2 like | 1447927_at    | 27.05       | 0.00 |
| <i>Cxcl1</i>                                           | chemokine (C-X-C motif) ligand 1                                                                                     | 1457644 s at  | 25.49       | 0.00 |
| <i>Rsad2</i>                                           | radical S-adenosyl methionine domain containing 2                                                                    | 1421008 at    | 23.83       | 0.00 |
| <i>Lrg1</i>                                            | leucine-rich alpha-2-glycoprotein 1                                                                                  | 1417290 at    | 23.31       | 0.00 |
| <i>Irgm</i>                                            | immunity-related GTPase family, M                                                                                    | 1418825 at    | 23.12       | 0.00 |
| <i>Fpr-rs2</i>                                         | formyl peptide receptor, related sequence 2                                                                          | 1422953 at    | 22.86       | 0.00 |
| <i>Rsad2</i>                                           | radical S-adenosyl methionine domain containing 2                                                                    | 1421009 at    | 22.65       | 0.00 |
| <i>Ifi44</i>                                           | interferon-induced protein 44                                                                                        | 1423555 a at  | 22.31       | 0.00 |
| <i>LOC677168</i>                                       | hypothetical protein LOC677168                                                                                       | 1431591 s at  | 21.06       | 0.00 |
| <i>Timp1</i>                                           | tissue inhibitor of metalloproteinase 1                                                                              | 1460227 at    | 20.72       | 0.00 |
| <i>Gbp2</i>                                            | guanylate nucleotide binding protein 2                                                                               | 1418240 at    | 20.65       | 0.00 |
| <i>Angptl4</i>                                         | angiopoietin-like 4                                                                                                  | 1417130 s at  | 20.56       | 0.00 |
| <i>2210407C18Rik</i>                                   | RIKEN cDNA 2210407C18 gene                                                                                           | 1425233 at    | 20.52       | 0.00 |
| <i>Gbp4</i>                                            | guanylate nucleotide binding protein 4                                                                               | 1418392 a at  | 20.50       | 0.00 |
| <i>Plac8</i>                                           | placenta-specific 8                                                                                                  | 1451335 at    | 19.78       | 0.00 |
| <i>Mbd1</i>                                            | methyl-CpG binding domain protein 1                                                                                  | 1453678 at    | 19.05       | 0.00 |
| <i>LOC240327</i>                                       | Hypothetical LOC240327                                                                                               | 1439831 at    | 19.01       | 0.00 |
| <i>Inhbb</i>                                           | inhibin beta-B                                                                                                       | 1426858 at    | 18.79       | 0.00 |
| <i>Socs3</i>                                           | suppressor of cytokine signaling 3                                                                                   | 1455899 x at  | 18.78       | 0.00 |
| <i>Cxcl13</i>                                          | chemokine (C-X-C motif) ligand 13                                                                                    | 1417851 at    | 18.46       | 0.00 |
| <i>Iigp1</i>                                           | interferon inducible GTPase 1                                                                                        | 1419043 a at  | 18.38       | 0.00 |
| <i>Gbp2</i>                                            | guanylate nucleotide binding protein 2                                                                               | 1435906 x at  | 17.84       | 0.00 |
| <i>Slc10a6</i>                                         | solute carrier family 10 (sodium/bile acid cotransporter family), member 6                                           | 1428776 at    | 17.53       | 0.00 |
| <i>Socs3</i>                                           | suppressor of cytokine signaling 3                                                                                   | 1456212 x at  | 17.36       | 0.00 |
| <i>Ifi47</i>                                           | interferon gamma inducible protein 47                                                                                | 1417292 at    | 17.23       | 0.00 |
| <i>Samhd1</i>                                          | SAM domain and HD domain, 1                                                                                          | 1418131 at    | 17.22       | 0.00 |
| <i>Tgtp</i>                                            | T-cell specific GTPase                                                                                               | 1449009 at    | 17.17       | 0.00 |
| <i>A1451557</i>                                        | expressed sequence A1451557                                                                                          | 1437176 at    | 17.12       | 0.00 |
| <i>Oasl2</i>                                           | 2'-5' oligoadenylate synthetase-like 2                                                                               | 1453196 a at  | 16.41       | 0.00 |
| <i>Hdc</i>                                             | histidine decarboxylase                                                                                              | 1454713 s at  | 15.94       | 0.00 |
| <i>Tap1</i>                                            | transporter 1, ATP-binding cassette, sub-family B (MDR/TAP)                                                          | 1416016 at    | 15.48       | 0.00 |
| <i>Rsad2</i>                                           | radical S-adenosyl methionine domain containing 2                                                                    | 1436058 at    | 15.36       | 0.00 |
| <i>Cfb</i>                                             | complement factor B                                                                                                  | 1417314 at    | 15.05       | 0.00 |
| <i>Selp</i>                                            | selectin, platelet                                                                                                   | 1420558 at    | 15.05       | 0.00 |
| <i>Ifi202b</i>                                         | interferon activated gene 202B                                                                                       | 1457666 s at  | 14.59       | 0.00 |
| <i>AA467197</i>                                        | expressed sequence AA467197                                                                                          | 1434046 at    | 14.22       | 0.01 |
| <i>Fbxo39</i>                                          | F-box protein 39                                                                                                     | 1443698 at    | 14.04       | 0.00 |
| <i>Nfkbiz</i>                                          | nuclear factor of kappa light polypeptide gene enhancer in B-cells inhibitor, zeta                                   | 1417483 at    | 13.27       | 0.00 |
| <i>Zbp1</i>                                            | Z-DNA binding protein 1                                                                                              | 1429947 a at  | 13.09       | 0.00 |
| <i>Herc5</i>                                           | hect domain and RLD 5                                                                                                | 1438037 at    | 13.08       | 0.00 |
| <i>9830147J24Rik</i>                                   | RIKEN cDNA 9830147J24 gene                                                                                           | 1434380 at    | 13.05       | 0.00 |
| <i>Stat1</i>                                           | signal transducer and activator of transcription 1                                                                   | 1450033 a at  | 12.87       | 0.00 |
| <i>Adams4</i>                                          | a disintegrin-like and metalloproteinase (reprolysin type) with thrombospondin type 1 motif, 4                       | 1452595_at    | 12.84       | 0.00 |
| <i>Rip4</i>                                            | receptor transporter protein 4                                                                                       | 1418580 at    | 12.83       | 0.00 |
| <i>Ms4a11</i>                                          | membrane-spanning 4-domains, subfamily A, member 11                                                                  | 1419599 s at  | 12.70       | 0.00 |
| <i>Ankrd2</i>                                          | ankyrin repeat domain 2 (stretch responsive muscle)                                                                  | 1419621 at    | 12.43       | 0.00 |
| <i>Bst2</i>                                            | bone marrow stromal cell antigen 2                                                                                   | 1424921 at    | 12.14       | 0.00 |
| <i>9830147J24Rik</i>                                   | RIKEN cDNA 9830147J24 gene                                                                                           | 1425156 at    | 12.09       | 0.00 |
| <i>Psmb8</i>                                           | proteasome (prosome, macropain) subunit, beta type 8 (large multifunctional peptidase 7)                             | 1422962 a at  | 11.94       | 0.00 |
| <i>Slnf4</i>                                           | schlafen 4                                                                                                           | 1427102 at    | 11.93       | 0.00 |
| <i>Saa1</i>                                            | serum amyloid A 1                                                                                                    | 1419075 s at  | 11.84       | 0.00 |
| <i>Psmb9</i>                                           | proteasome (prosome, macropain) subunit, beta type 9 (large multifunctional peptidase 2)                             | 1450696 at    | 11.70       | 0.00 |
| <i>Ccl2</i>                                            | chemokine (C-C motif) ligand 2                                                                                       | 1420380 at    | 11.64       | 0.00 |
| <i>Dscr1</i>                                           | Down syndrome critical region homolog 1 (human)                                                                      | 1416601 a at  | 11.07       | 0.00 |
| <i>Cxcl13</i>                                          | chemokine (C-X-C motif) ligand 13                                                                                    | 1448859 at    | 10.72       | 0.00 |
| <i>Mmp3</i>                                            | matrix metalloproteinase 3                                                                                           | 1418945 at    | 10.70       | 0.00 |
| ---                                                    | Transcribed locus                                                                                                    | 1436274 at    | 10.69       | 0.02 |
| <i>Ms4a6d</i>                                          | membrane-spanning 4-domains, subfamily A, member 6D                                                                  | 1419598 at    | 10.65       | 0.00 |
| <i>Parp14</i>                                          | poly (ADP-ribose) polymerase family, member 14                                                                       | 1451564 at    | 10.62       | 0.00 |
| ---                                                    | ---                                                                                                                  | 1447285 at    | 10.49       | 0.00 |
| <i>Slc15a3</i>                                         | solute carrier family 15, member 3                                                                                   | 1420697 at    | 10.43       | 0.00 |

|                                                                           |                                                                                                                                                                                                                                                                                                                              |              |       |      |
|---------------------------------------------------------------------------|------------------------------------------------------------------------------------------------------------------------------------------------------------------------------------------------------------------------------------------------------------------------------------------------------------------------------|--------------|-------|------|
| <i>Tlr2</i>                                                               | toll-like receptor 2                                                                                                                                                                                                                                                                                                         | 1419132 at   | 10.38 | 0.00 |
| <i>D14Erd668e</i>                                                         | DNA segment, Chr 14, ERATO Doi 668, expressed                                                                                                                                                                                                                                                                                | 1438868 at   | 10.38 | 0.00 |
| <i>Cdkn1a</i>                                                             | cyclin-dependent kinase inhibitor 1A (P21)                                                                                                                                                                                                                                                                                   | 1424638 at   | 10.35 | 0.00 |
| <i>Irg1</i>                                                               | immunoresponsive gene 1                                                                                                                                                                                                                                                                                                      | 1427381 at   | 10.28 | 0.00 |
| <i>Chi3l3</i>                                                             | chitinase 3-like 3                                                                                                                                                                                                                                                                                                           | 1419764 at   | 10.27 | 0.00 |
| <i>Oasl1</i>                                                              | 2'-5' oligoadenylate synthetase-like 1                                                                                                                                                                                                                                                                                       | 1424339 at   | 10.25 | 0.00 |
| <i>Ccl5</i>                                                               | chemokine (C-C motif) ligand 5                                                                                                                                                                                                                                                                                               | 1418126 at   | 10.03 | 0.00 |
| ---                                                                       | ---                                                                                                                                                                                                                                                                                                                          | 1455393 at   | 9.90  | 0.00 |
| <i>Lox</i>                                                                | lysyl oxidase                                                                                                                                                                                                                                                                                                                | 1416121 at   | 9.87  | 0.00 |
| ---                                                                       | ---                                                                                                                                                                                                                                                                                                                          | 1438027 at   | 9.85  | 0.00 |
| <i>Mbd1</i>                                                               | methyl-CpG binding domain protein 1                                                                                                                                                                                                                                                                                          | 1430838 x at | 9.79  | 0.00 |
| <i>Msr1</i>                                                               | macrophage scavenger receptor 1                                                                                                                                                                                                                                                                                              | 1448061 at   | 9.74  | 0.00 |
| <i>Cxcl9</i>                                                              | chemokine (C-X-C motif) ligand 9                                                                                                                                                                                                                                                                                             | 1456907 at   | 9.48  | 0.00 |
| <i>Tapbp1</i>                                                             | TAP binding protein-like                                                                                                                                                                                                                                                                                                     | 1451544 at   | 9.47  | 0.00 |
| <i>Cp</i>                                                                 | ceruloplasmin                                                                                                                                                                                                                                                                                                                | 1441326 at   | 9.39  | 0.00 |
| <i>Cyp1b1</i>                                                             | cytochrome P450, family 1, subfamily b, polypeptide 1                                                                                                                                                                                                                                                                        | 1416613 at   | 9.38  | 0.00 |
| <i>Upp1</i>                                                               | uridine phosphorylase 1                                                                                                                                                                                                                                                                                                      | 1448562 at   | 9.34  | 0.00 |
| <i>Icam1</i>                                                              | intercellular adhesion molecule                                                                                                                                                                                                                                                                                              | 1424067 at   | 9.32  | 0.00 |
| <i>Fkbp5</i>                                                              | FK506 binding protein 5                                                                                                                                                                                                                                                                                                      | 1416125 at   | 9.28  | 0.00 |
| <i>Ifih1</i>                                                              | interferon induced with helicase C domain 1                                                                                                                                                                                                                                                                                  | 1426276 at   | 9.20  | 0.00 |
| <i>Ifi202b</i>                                                            | interferon activated gene 202B                                                                                                                                                                                                                                                                                               | 1421551 s at | 9.15  | 0.00 |
| <i>Casp4</i>                                                              | caspace 4, apoptosis-related cysteine peptidase                                                                                                                                                                                                                                                                              | 1449591 at   | 9.12  | 0.00 |
| <i>Tnfaip3</i>                                                            | tumor necrosis factor, alpha-induced protein 3                                                                                                                                                                                                                                                                               | 1433699 at   | 9.10  | 0.00 |
| <i>Ctla2b</i>                                                             | cytotoxic T lymphocyte-associated protein 2 beta                                                                                                                                                                                                                                                                             | 1452352 at   | 9.01  | 0.00 |
| <i>Marco</i>                                                              | macrophage receptor with collagenous structure                                                                                                                                                                                                                                                                               | 1449498 at   | 9.00  | 0.00 |
| <i>Lox</i>                                                                | lysyl oxidase                                                                                                                                                                                                                                                                                                                | 1448228 at   | 9.00  | 0.00 |
| <i>Stat1</i>                                                              | signal transducer and activator of transcription 1                                                                                                                                                                                                                                                                           | 1450034 at   | 8.99  | 0.00 |
| <i>LOC630509 /// LOC674192</i>                                            | similar to H-2 class I histocompatibility antigen, Q7 alpha chain precursor (QA-2 antigen) /// region containing histocompatibility 2, Q region locus 9; histocompatibility 2, Q region locus 7                                                                                                                              | 1418536_at   | 8.96  | 0.00 |
| <i>Socs3</i>                                                              | suppressor of cytokine signaling 3                                                                                                                                                                                                                                                                                           | 1416576 at   | 8.91  | 0.00 |
| <i>Ms4a4c</i>                                                             | membrane-spanning 4-domains, subfamily A, member 4C                                                                                                                                                                                                                                                                          | 1450291 s at | 8.87  | 0.00 |
| <i>Rnd1</i>                                                               | Rho family GTPase 1                                                                                                                                                                                                                                                                                                          | 1455197 at   | 8.86  | 0.00 |
| <i>Lgals3bp</i>                                                           | lectin, galactoside-binding, soluble, 3 binding protein                                                                                                                                                                                                                                                                      | 1448380 at   | 8.68  | 0.00 |
| <i>BC013672</i>                                                           | cDNA sequence BC013672                                                                                                                                                                                                                                                                                                       | 1451777 at   | 8.66  | 0.00 |
| <i>Cebpd</i>                                                              | CCAAT/enhancer binding protein (C/EBP), delta                                                                                                                                                                                                                                                                                | 1423233 at   | 8.64  | 0.00 |
| <i>Ifi204 /// LOC672547</i>                                               | interferon activated gene 204 /// similar to Interferon-activatable protein 204 (Ifi-204) (Interferon-inducible protein p204)                                                                                                                                                                                                | 1419603_at   | 8.55  | 0.00 |
| <i>Dtx3l</i>                                                              | deltex 3-like (Drosophila)                                                                                                                                                                                                                                                                                                   | 1435208 at   | 8.54  | 0.00 |
| <i>Stat1</i>                                                              | signal transducer and activator of transcription 1                                                                                                                                                                                                                                                                           | 1420915 at   | 8.52  | 0.00 |
| <i>Ubd</i>                                                                | ubiquitin D                                                                                                                                                                                                                                                                                                                  | 1419762 at   | 8.29  | 0.00 |
| <i>Cp</i>                                                                 | ceruloplasmin                                                                                                                                                                                                                                                                                                                | 1448734 at   | 8.05  | 0.00 |
| <i>Ibrdc3</i>                                                             | IBR domain containing 3                                                                                                                                                                                                                                                                                                      | 1432478 a at | 8.03  | 0.00 |
| <i>Cp</i>                                                                 | ceruloplasmin                                                                                                                                                                                                                                                                                                                | 1417495 x at | 8.00  | 0.00 |
| <i>Serpina3m</i>                                                          | serine (or cysteine) peptidase inhibitor, clade A, member 3M                                                                                                                                                                                                                                                                 | 1421921 at   | 7.93  | 0.00 |
| <i>Psmb10</i>                                                             | proteasome (prosome, macropain) subunit, beta type 10                                                                                                                                                                                                                                                                        | 1448632 at   | 7.91  | 0.00 |
| <i>H2-T23 /// C920025E04Rik /// LOC667803 /// LOC672711 /// LOC674134</i> | histocompatibility 2, T region locus 23 /// RIKEN cDNA C920025E04 gene /// similar to H-2 class I histocompatibility antigen, D-37 alpha chain precursor /// similar to H-2 class I histocompatibility antigen, D-37 alpha chain precursor /// similar to H-2 class I histocompatibility antigen, D-37 alpha chain precursor | 1449556_at   | 7.90  | 0.00 |
| <i>Parp9</i>                                                              | poly (ADP-ribose) polymerase family, member 9                                                                                                                                                                                                                                                                                | 1416897 at   | 7.79  | 0.00 |
| <i>Cyp1b1</i>                                                             | cytochrome P450, family 1, subfamily b, polypeptide 1                                                                                                                                                                                                                                                                        | 1416612 at   | 7.62  | 0.00 |
| <i>Fgl2</i>                                                               | fibrinogen-like protein 2                                                                                                                                                                                                                                                                                                    | 1421854 at   | 7.58  | 0.01 |
| <i>Myc</i>                                                                | myelocytomatosis oncogene                                                                                                                                                                                                                                                                                                    | 1424942 a at | 7.51  | 0.00 |
| <i>Mbd1</i>                                                               | methyl-CpG binding domain protein 1                                                                                                                                                                                                                                                                                          | 1417968 a at | 7.46  | 0.00 |
| <i>Sphk1</i>                                                              | sphingosine kinase 1                                                                                                                                                                                                                                                                                                         | 1451596 a at | 7.44  | 0.00 |
| <i>Herc5</i>                                                              | hect domain and RLD 5                                                                                                                                                                                                                                                                                                        | 1453757 at   | 7.41  | 0.00 |
| <i>0610037M15Rik</i>                                                      | RIKEN cDNA 0610037M15 gene                                                                                                                                                                                                                                                                                                   | 1431008 at   | 7.37  | 0.00 |
| <i>Ube1l</i>                                                              | ubiquitin-activating enzyme E1-like                                                                                                                                                                                                                                                                                          | 1426971 at   | 7.36  | 0.00 |
| <i>Hp</i>                                                                 | haptoglobin                                                                                                                                                                                                                                                                                                                  | 1448881 at   | 7.34  | 0.00 |
| <i>Cp</i>                                                                 | ceruloplasmin                                                                                                                                                                                                                                                                                                                | 1417494 a at | 7.27  | 0.00 |
| <i>Bcr</i>                                                                | breakpoint cluster region homolog                                                                                                                                                                                                                                                                                            | 1452368 at   | 7.11  | 0.00 |
| <i>Slc39a14</i>                                                           | solute carrier family 39 (zinc transporter), member 14                                                                                                                                                                                                                                                                       | 1457770 at   | 7.08  | 0.00 |
| <i>Trim30</i>                                                             | tripartite motif protein 30                                                                                                                                                                                                                                                                                                  | 1451860 a at | 6.98  | 0.00 |
| <i>Pfkfb3</i>                                                             | 6-phosphofructo-2-kinase/fructose-2,6-bisphosphatase 3                                                                                                                                                                                                                                                                       | 1416432 at   | 6.97  | 0.00 |
| <i>Nfkbiz</i>                                                             | nuclear factor of kappa light polypeptide gene enhancer in B-cells inhibitor, zeta                                                                                                                                                                                                                                           | 1448728 a at | 6.86  | 0.00 |
| <i>Oas1a</i>                                                              | 2'-5' oligoadenylate synthetase 1A                                                                                                                                                                                                                                                                                           | 1424775 at   | 6.80  | 0.00 |
| ---                                                                       | ---                                                                                                                                                                                                                                                                                                                          | 1455660 at   | 6.79  | 0.00 |
| <i>Selp</i>                                                               | selectin, platelet                                                                                                                                                                                                                                                                                                           | 1449906 at   | 6.78  | 0.00 |
| <i>Pgf</i>                                                                | placental growth factor                                                                                                                                                                                                                                                                                                      | 1418471 at   | 6.76  | 0.00 |
| <i>Pap</i>                                                                | pancreatitis-associated protein                                                                                                                                                                                                                                                                                              | 1448290 at   | 6.75  | 0.00 |
| <i>Mtl</i>                                                                | metallothionein 1                                                                                                                                                                                                                                                                                                            | 1422557 s at | 6.73  | 0.00 |
| <i>4833442J19Rik</i>                                                      | RIKEN cDNA 4833442J19 gene                                                                                                                                                                                                                                                                                                   | 1457915 at   | 6.68  | 0.00 |
| <i>D11Egp2e</i>                                                           | DNA segment, Chr 11, Lothar Hennighausen 2, expressed                                                                                                                                                                                                                                                                        | 1451426 at   | 6.67  | 0.00 |
| <i>Clec4d</i>                                                             | C-type lectin domain family 4, member d                                                                                                                                                                                                                                                                                      | 1420804 s at | 6.66  | 0.00 |
| <i>H2-D1 /// H2-K1 /// LOC56628</i>                                       | histocompatibility 2, D region locus 1 /// histocompatibility 2, K1, K region /// MHC (A.CA/J(H-2K-f)) class I antigen                                                                                                                                                                                                       | 1424948_x_at | 6.64  | 0.00 |
| <i>Plaur</i>                                                              | plasminogen activator, urokinase receptor                                                                                                                                                                                                                                                                                    | 1452521 a at | 6.61  | 0.00 |
| <i>Sema5a</i>                                                             | sema domain, seven thrombospondin repeats (type 1 and type 1-like), transmembrane domain (TM) and short cytoplasmic domain, (semaphorin) 5A                                                                                                                                                                                  | 1434776 at   | 6.61  | 0.00 |
| <i>Dtx3l</i>                                                              | deltex 3-like (Drosophila)                                                                                                                                                                                                                                                                                                   | 1439825 at   | 6.60  | 0.00 |
| <i>Mpeg1 /// LOC671359</i>                                                | macrophage expressed gene 1 /// similar to macrophage expressed gene 1                                                                                                                                                                                                                                                       | 1427076 at   | 6.58  | 0.00 |
| <i>H2-K1</i>                                                              | histocompatibility 2, K1, K region                                                                                                                                                                                                                                                                                           | 1427746 x at | 6.57  | 0.00 |
| <i>Zfp697</i>                                                             | zinc finger protein 697                                                                                                                                                                                                                                                                                                      | 1440999 at   | 6.55  | 0.00 |
| <i>Fgl2</i>                                                               | fibrinogen-like protein 2                                                                                                                                                                                                                                                                                                    | 1421855 at   | 6.49  | 0.00 |
| <i>H2-Q1 /// 0610037M15Rik</i>                                            | histocompatibility 2, Q region locus 1 /// RIKEN cDNA 0610037M15 gene                                                                                                                                                                                                                                                        | 1451644 a at | 6.47  | 0.00 |
| <i>Ccl7</i>                                                               | chemokine (C-C motif) ligand 7                                                                                                                                                                                                                                                                                               | 1421228 at   | 6.44  | 0.00 |
| <i>Map3k8</i>                                                             | mitogen activated protein kinase kinase kinase 8                                                                                                                                                                                                                                                                             | 1419208 at   | 6.34  | 0.00 |
| <i>Parp12</i>                                                             | poly (ADP-ribose) polymerase family, member 12                                                                                                                                                                                                                                                                               | 1426774 at   | 6.33  | 0.00 |
| <i>Tyki</i>                                                               | thymidylate kinase family LPS-inducible member                                                                                                                                                                                                                                                                               | 1450484 a at | 6.30  | 0.00 |
| <i>Stat1</i>                                                              | signal transducer and activator of transcription 1                                                                                                                                                                                                                                                                           | 1440481 at   | 6.14  | 0.00 |
| <i>Cxcl11</i>                                                             | chemokine (C-X-C motif) ligand 11                                                                                                                                                                                                                                                                                            | 1419697 at   | 6.13  | 0.02 |
| <i>Snx10</i>                                                              | sorting nexin 10                                                                                                                                                                                                                                                                                                             | 1431055 a at | 6.11  | 0.00 |
| <i>Gbp1</i>                                                               | guanylate nucleotide binding protein 1                                                                                                                                                                                                                                                                                       | 1420549 at   | 6.08  | 0.00 |
| <i>Loh11cr2a</i>                                                          | loss of heterozygosity, 11, chromosomal region 2, gene A homolog (human)                                                                                                                                                                                                                                                     | 1426221 at   | 6.07  | 0.00 |
| <i>Clr</i>                                                                | complement component 1, r subcomponent                                                                                                                                                                                                                                                                                       | 1417009 at   | 6.07  | 0.00 |
| <i>Slc45a3</i>                                                            | solute carrier family 45, member 3                                                                                                                                                                                                                                                                                           | 1426663 s at | 6.05  | 0.00 |

|                                         |                                                                                                                                                                                                                                       |              |      |      |
|-----------------------------------------|---------------------------------------------------------------------------------------------------------------------------------------------------------------------------------------------------------------------------------------|--------------|------|------|
| <i>Samhd1</i>                           | SAM domain and HD domain, 1                                                                                                                                                                                                           | 1434438 at   | 6.05 | 0.00 |
| <i>Sh2d5</i>                            | SH2 domain containing 5                                                                                                                                                                                                               | 1436100 at   | 6.03 | 0.01 |
| <i>Iff35</i>                            | interferon-induced protein 35                                                                                                                                                                                                         | 1445897 s at | 6.02 | 0.00 |
| <i>Iff35</i>                            | interferon-induced protein 35                                                                                                                                                                                                         | 1424617 at   | 6.01 | 0.00 |
| <i>Hmox1</i>                            | heme oxygenase (decycling) 1                                                                                                                                                                                                          | 1448239 at   | 6.00 | 0.00 |
| <i>Hck</i>                              | hemopoietic cell kinase                                                                                                                                                                                                               | 1449455 at   | 5.94 | 0.00 |
| <i>Zbp1</i>                             | Z-DNA binding protein 1                                                                                                                                                                                                               | 1419604 at   | 5.94 | 0.00 |
| <i>LOC620695</i>                        | hypothetical protein LOC620695                                                                                                                                                                                                        | 1455271 at   | 5.93 | 0.01 |
| <i>Asb4</i>                             | ankyrin repeat and SOCS box-containing protein 4                                                                                                                                                                                      | 1423422 at   | 5.93 | 0.00 |
| <i>Asb4</i>                             | ankyrin repeat and SOCS box-containing protein 4                                                                                                                                                                                      | 1433919 at   | 5.93 | 0.01 |
| <i>Il18bp</i>                           | interleukin 18 binding protein                                                                                                                                                                                                        | 1450424 a at | 5.92 | 0.00 |
| <i>Ngp</i>                              | neutrophilic granule protein                                                                                                                                                                                                          | 1418722 at   | 5.87 | 0.00 |
| <i>Clea1 // Clca2</i>                   | chloride channel calcium activated 1 // chloride channel calcium activated 2                                                                                                                                                          | 1460259 s at | 5.85 | 0.00 |
| <i>D11Erd759e // LOC672513</i>          | DNA segment, Chr 11, ERATO Doi 759, expressed // similar to chromosome 17 open reading frame 27                                                                                                                                       | 1455500 at   | 5.80 | 0.00 |
| <i>6030422H21Rik</i>                    | RIKEN cDNA 6030422H21 gene                                                                                                                                                                                                            | 1441799 at   | 5.79 | 0.00 |
| <i>E230013L22Rik</i>                    | RIKEN cDNA E230013L22 gene                                                                                                                                                                                                            | 1439098 at   | 5.73 | 0.00 |
| <i>Irak3</i>                            | interleukin-1 receptor-associated kinase 3                                                                                                                                                                                            | 1435040 at   | 5.72 | 0.00 |
| <i>9230117N10Rik</i>                    | RIKEN cDNA 9230117N10 gene                                                                                                                                                                                                            | 1416200 at   | 5.71 | 0.00 |
| <i>Fcgr3a</i>                           | Fc fragment of IgG, low affinity IIIa, receptor                                                                                                                                                                                       | 1425225 at   | 5.71 | 0.00 |
| <i>Ear1 // Ear2 // Ear3 // Ear12</i>    | eosinophil-associated, ribonuclease A family, member 1 // eosinophil-associated, ribonuclease A family, member 2 // eosinophil-associated, ribonuclease A family, member 3 // eosinophil-associated, ribonuclease A family, member 12 | 1422411_s at | 5.68 | 0.00 |
| <i>Cyp7b1</i>                           | cytochrome P450, family 7, subfamily b, polypeptide 1                                                                                                                                                                                 | 1421074 at   | 5.66 | 0.00 |
| <i>Hdc</i>                              | histidine decarboxylase                                                                                                                                                                                                               | 1451796 s at | 5.63 | 0.00 |
| <i>C1r // LOC667277 // LOC677405</i>    | complement component 1, r subcomponent // similar to Complement C1r-B subcomponent precursor (Complement component 1, r-B subcomponent) // similar to complement component 1, r subcomponent                                          | 1456437_x at | 5.63 | 0.00 |
| <i>Igam</i>                             | integrin alpha M                                                                                                                                                                                                                      | 1422046 at   | 5.60 | 0.00 |
| <i>Enc1</i>                             | ectodermal-neural cortex 1                                                                                                                                                                                                            | 1420965 a at | 5.60 | 0.00 |
| <i>Nmi</i>                              | N-myc (and STAT) interactor                                                                                                                                                                                                           | 1425719 a at | 5.60 | 0.00 |
| <i>C1s</i>                              | complement component 1, s subcomponent                                                                                                                                                                                                | 1424041 s at | 5.59 | 0.00 |
| <i>Saa1</i>                             | serum amyloid A 1                                                                                                                                                                                                                     | 1450788 at   | 5.54 | 0.00 |
| <i>1200016E24Rik</i>                    | RIKEN cDNA 1200016E24 gene                                                                                                                                                                                                            | 1452418 at   | 5.52 | 0.00 |
| <i>Prg4</i>                             | proteoglycan 4 (megakaryocyte stimulating factor, articular superficial zone protein)                                                                                                                                                 | 1449824 at   | 5.51 | 0.00 |
| <i>Fkbp5</i>                            | FK506 binding protein 5                                                                                                                                                                                                               | 1448231 at   | 5.46 | 0.00 |
| <i>Osmr</i>                             | oncostatin M receptor                                                                                                                                                                                                                 | 1418675 at   | 5.45 | 0.00 |
| <i>Stat2</i>                            | signal transducer and activator of transcription 2                                                                                                                                                                                    | 1450403 at   | 5.44 | 0.00 |
| <i>Sdc4</i>                             | syndecan 4                                                                                                                                                                                                                            | 1448793 a at | 5.44 | 0.00 |
| <i>Iff35</i>                            | interferon-induced protein 35                                                                                                                                                                                                         | 1459151 x at | 5.42 | 0.00 |
| <i>AI607873</i>                         | expressed sequence AI607873                                                                                                                                                                                                           | 1457035 at   | 5.42 | 0.00 |
| <i>Ccl19</i>                            | chemokine (C-C motif) ligand 19                                                                                                                                                                                                       | 1449277 at   | 5.39 | 0.00 |
| <i>Osmr</i>                             | oncostatin M receptor                                                                                                                                                                                                                 | 1418674 at   | 5.37 | 0.00 |
| <i>BC013672</i>                         | cDNA sequence BC013672                                                                                                                                                                                                                | 1439114 at   | 5.36 | 0.01 |
| <i>Mikl</i>                             | mixed lineage kinase domain-like                                                                                                                                                                                                      | 1429570 at   | 5.36 | 0.00 |
| <i>Fpr1</i>                             | formyl peptide receptor 1                                                                                                                                                                                                             | 1450808 at   | 5.36 | 0.00 |
| <i>Ube1 // D330022A01Rik</i>            | ubiquitin-activating enzyme E1-like // RIKEN cDNA D330022A01 gene                                                                                                                                                                     | 1426970 a at | 5.35 | 0.00 |
| <i>Sln8</i>                             | schlafen 8                                                                                                                                                                                                                            | 1451655 at   | 5.34 | 0.00 |
| <i>Cdkn1a</i>                           | cyclin-dependent kinase inhibitor 1A (P21)                                                                                                                                                                                            | 1421679 a at | 5.31 | 0.00 |
| <i>Ibrdc3</i>                           | IBR domain containing 3                                                                                                                                                                                                               | 1435226 at   | 5.31 | 0.00 |
| <i>Plec1 // LOC671535</i>               | plectin 1 // similar to poly (ADP-ribose) polymerase family, member 10                                                                                                                                                                | 1452178 at   | 5.30 | 0.00 |
| <i>1110007F12Rik</i>                    | RIKEN cDNA 1110007F12 gene                                                                                                                                                                                                            | 1424354 at   | 5.29 | 0.00 |
| <i>Syt12</i>                            | synaptotagmin XII                                                                                                                                                                                                                     | 1422878 at   | 5.29 | 0.00 |
| <i>Steap4</i>                           | STEAP family member 4                                                                                                                                                                                                                 | 1425829 a at | 5.26 | 0.01 |
| <i>Ctps</i>                             | cytidine 5'-triphosphate synthase                                                                                                                                                                                                     | 1416563 at   | 5.20 | 0.00 |
| <i>Cp</i>                               | ceruloplasmin                                                                                                                                                                                                                         | 1417496 at   | 5.20 | 0.00 |
| <i>1200007C13Rik</i>                    | RIKEN cDNA 1200007C13 gene                                                                                                                                                                                                            | 1431837 at   | 5.14 | 0.00 |
| <i>Pde4b</i>                            | phosphodiesterase 4B, cAMP specific                                                                                                                                                                                                   | 1422473 at   | 5.13 | 0.01 |
| <i>Ddx58</i>                            | DEAD (Asp-Glu-Ala-Asp) box polypeptide 58                                                                                                                                                                                             | 1436562 at   | 5.10 | 0.00 |
| <i>Trex1</i>                            | three prime repair exonuclease 1                                                                                                                                                                                                      | 1450672 a at | 5.09 | 0.00 |
| <i>Ifitm1</i>                           | interferon induced transmembrane protein 1                                                                                                                                                                                            | 1424254 at   | 5.04 | 0.00 |
| <i>A630077B13Rik</i>                    | RIKEN cDNA A630077B13 gene                                                                                                                                                                                                            | 1436576 at   | 5.03 | 0.02 |
| <i>H2-K1</i>                            | Histocompatibility 2, K1, K region                                                                                                                                                                                                    | 1451593 at   | 5.03 | 0.00 |
| <i>H2-K1</i>                            | histocompatibility 2, K1, K region                                                                                                                                                                                                    | 1425336 x at | 5.03 | 0.00 |
| <i>Casp12</i>                           | caspase 12                                                                                                                                                                                                                            | 1418981 at   | 5.01 | 0.00 |
| <i>Selp</i>                             | selectin, platelet                                                                                                                                                                                                                    | 1440173 x at | 5.00 | 0.00 |
| <i>Irf8</i>                             | interferon regulatory factor 8                                                                                                                                                                                                        | 1416714 at   | 5.00 | 0.00 |
| <i>Fbp1</i>                             | fructose biphosphatase 1                                                                                                                                                                                                              | 1448470 at   | 4.98 | 0.00 |
| <i>Mbd1</i>                             | methyl-CpG binding domain protein 1                                                                                                                                                                                                   | 1437061 at   | 4.98 | 0.00 |
| <i>Ctla2a</i>                           | cytotoxic T lymphocyte-associated protein 2 alpha                                                                                                                                                                                     | 1448471 a at | 4.97 | 0.00 |
| <i>Junb</i>                             | Jun-B oncogene                                                                                                                                                                                                                        | 1415899 at   | 4.97 | 0.00 |
| <i>Uck2</i>                             | Uridine-cytidine kinase 2                                                                                                                                                                                                             | 1441858 at   | 4.96 | 0.01 |
| <i>Tmem38b</i>                          | transmembrane protein 38B                                                                                                                                                                                                             | 1449677 s at | 4.95 | 0.00 |
| <i>Xdh</i>                              | xanthine dehydrogenase                                                                                                                                                                                                                | 1451006 at   | 4.95 | 0.00 |
| <i>Tapbp</i>                            | TAP binding protein                                                                                                                                                                                                                   | 1450378 at   | 4.92 | 0.00 |
| <i>Sln1</i>                             | schlafen 1                                                                                                                                                                                                                            | 1418612 at   | 4.92 | 0.00 |
| <i>Casp12</i>                           | caspase 12                                                                                                                                                                                                                            | 1449297 at   | 4.90 | 0.00 |
| <i>Ch25h</i>                            | cholesterol 25-hydroxylase                                                                                                                                                                                                            | 1449227 at   | 4.89 | 0.00 |
| <i>2310016F22Rik // BC020489</i>        | RIKEN cDNA 2310016F22 gene // cDNA sequence BC020489                                                                                                                                                                                  | 1424518 at   | 4.86 | 0.00 |
| <i>Cd14</i>                             | CD14 antigen                                                                                                                                                                                                                          | 1417268 at   | 4.86 | 0.00 |
| <i>Sema5a</i>                           | sema domain, seven thrombospondin repeats (type 1 and type 1-like), transmembrane domain (TM) and short cytoplasmic domain, (semaphorin) 5A                                                                                           | 1437422 at   | 4.86 | 0.00 |
| <i>Dscr1</i>                            | Down syndrome critical region homolog 1 (human)                                                                                                                                                                                       | 1416600 a at | 4.84 | 0.00 |
| <i>Tap2</i>                             | transporter 2, ATP-binding cassette, sub-family B (MDR/TAP)                                                                                                                                                                           | 1453913 a at | 4.79 | 0.00 |
| <i>Enc1</i>                             | ectodermal-neural cortex 1                                                                                                                                                                                                            | 1450061 at   | 4.79 | 0.00 |
| <i>Chac1</i>                            | ChaC, cation transport regulator-like 1 (E. coli)                                                                                                                                                                                     | 1451382 at   | 4.79 | 0.00 |
| <i>Trim34 // LOC434218 // LOC640746</i> | tripartite motif protein 34 // similar to Tripartite motif protein 34 // similar to Tripartite motif protein 34                                                                                                                       | 1421550_a at | 4.78 | 0.00 |
| <i>Pvr</i>                              | poliovirus receptor                                                                                                                                                                                                                   | 1423905 at   | 4.78 | 0.00 |
| <i>Pde4b</i>                            | phosphodiesterase 4B, cAMP specific                                                                                                                                                                                                   | 1422474 at   | 4.78 | 0.02 |
| <i>Mt1</i>                              | metallothionein 1                                                                                                                                                                                                                     | 1451612 at   | 4.78 | 0.00 |
| <i>---</i>                              | 12 days embryo spinal cord cDNA, RIKEN full-length enriched library, clone:C530003P15 product:unclassifiable, full insert sequence                                                                                                    | 1458271_at   | 4.76 | 0.00 |
| <i>Anxa7</i>                            | annexin A7                                                                                                                                                                                                                            | 1416138 at   | 4.75 | 0.00 |
| <i>Stat2</i>                            | signal transducer and activator of transcription 2                                                                                                                                                                                    | 1421911 at   | 4.73 | 0.00 |
| <i>Cyb561</i>                           | cytochrome b-561                                                                                                                                                                                                                      | 1417507 at   | 4.72 | 0.00 |
| <i>LOC547343</i>                        | similar to H-2 class I histocompatibility antigen, L-D alpha chain precursor                                                                                                                                                          | 1451683 x at | 4.69 | 0.00 |

|                                                                                                 |                                                                                                                         |              |      |      |
|-------------------------------------------------------------------------------------------------|-------------------------------------------------------------------------------------------------------------------------|--------------|------|------|
| <i>Fen1</i>                                                                                     | flap structure specific endonuclease 1                                                                                  | 1421731 a at | 4.67 | 0.00 |
| <i>Trim30</i>                                                                                   | tripartite motif protein 30                                                                                             | 1417961 a at | 4.66 | 0.00 |
| <i>Trim30</i> /// <i>A1451617</i>                                                               | tripartite motif protein 30 /// expressed sequence A1451617                                                             | 1456494 a at | 4.66 | 0.00 |
| <i>Plscr1</i> /// <i>LOC433328</i> /// <i>LOC677340</i>                                         | phospholipid scramblase 1 /// hypothetical LOC433328 /// hypothetical protein LOC677340                                 | 1429527_a at | 4.65 | 0.00 |
| <i>Slc39a14</i>                                                                                 | solute carrier family 39 (zinc transporter), member 14                                                                  | 1427035 at   | 4.62 | 0.00 |
| <i>Pvr</i>                                                                                      | poliovirus receptor                                                                                                     | 1450295 s at | 4.61 | 0.00 |
| <i>Arts1</i>                                                                                    | type 1 tumor necrosis factor receptor shedding aminopeptidase regulator                                                 | 1439068 at   | 4.61 | 0.00 |
| <i>8430417A20Rik</i>                                                                            | RIKEN cDNA 8430417A20 gene                                                                                              | 1430352 at   | 4.61 | 0.01 |
| <i>Fem1b</i>                                                                                    | feminization 1 homolog b (C. elegans)                                                                                   | 1418323 at   | 4.61 | 0.00 |
| <i>Ampd3</i>                                                                                    | AMP deaminase 3                                                                                                         | 1422573 at   | 4.59 | 0.00 |
| <i>2610307O08Rik</i>                                                                            | RIKEN cDNA 2610307O08 gene                                                                                              | 1447621 s at | 4.58 | 0.00 |
| <i>Plscr1</i>                                                                                   | phospholipid scramblase 1                                                                                               | 1453181 x at | 4.55 | 0.00 |
| <i>Gadd45g</i>                                                                                  | growth arrest and DNA-damage-inducible 45 gamma                                                                         | 1453851 a at | 4.54 | 0.00 |
| <i>Indo</i>                                                                                     | indoleamine-pyrrole 2,3 dioxygenase                                                                                     | 1420437 at   | 4.50 | 0.00 |
| <i>Wars</i>                                                                                     | tryptophanyl-tRNA synthetase                                                                                            | 1425106 a at | 4.50 | 0.00 |
| <i>Nfkbia</i>                                                                                   | nuclear factor of kappa light chain gene enhancer in B-cells inhibitor, alpha                                           | 1449731 s at | 4.49 | 0.00 |
| <i>Arts1</i>                                                                                    | type 1 tumor necrosis factor receptor shedding aminopeptidase regulator                                                 | 1416942 at   | 4.48 | 0.00 |
| <i>Map3k6</i>                                                                                   | mitogen-activated protein kinase kinase kinase 6                                                                        | 1449901 a at | 4.46 | 0.00 |
| <i>Ptp4a1</i>                                                                                   | protein tyrosine phosphatase 4a1                                                                                        | 1419024 at   | 4.45 | 0.00 |
| <i>Tapbp</i>                                                                                    | TAP binding protein                                                                                                     | 1421812 at   | 4.45 | 0.00 |
| <i>Mbd1</i>                                                                                     | methyl-CpG binding domain protein 1                                                                                     | 1430837 a at | 4.45 | 0.00 |
| <i>Stno</i>                                                                                     | strawberry notch homolog (Drosophila)                                                                                   | 1458308 at   | 4.43 | 0.00 |
| <i>C3</i>                                                                                       | complement component 3                                                                                                  | 1423954 at   | 4.43 | 0.00 |
| <i>Iigb3</i>                                                                                    | integrin beta 3                                                                                                         | 1455257 at   | 4.42 | 0.00 |
| <i>A330021E22Rik</i>                                                                            | RIKEN cDNA A330021E22 gene                                                                                              | 1455859 at   | 4.41 | 0.00 |
| <i>Birc3</i>                                                                                    | baculoviral IAP repeat-containing 3                                                                                     | 1421392 s at | 4.38 | 0.00 |
| <i>Tlr3</i>                                                                                     | toll-like receptor 3                                                                                                    | 1422781 at   | 4.36 | 0.00 |
| <i>C330012H03Rik</i>                                                                            | RIKEN cDNA C330012H03 gene                                                                                              | 1439764 s at | 4.36 | 0.00 |
| <i>Zbtb16</i>                                                                                   | Zinc finger and BTB domain containing 16                                                                                | 1459557 at   | 4.34 | 0.00 |
| <i>Ctla2a</i> /// <i>Ctla2b</i>                                                                 | cytotoxic T lymphocyte-associated protein 2 alpha /// cytotoxic T lymphocyte-associated protein 2 beta                  | 1416811_s at | 4.31 | 0.00 |
| <i>Sostdc1</i>                                                                                  | sclerostin domain containing 1                                                                                          | 1449340 at   | 4.30 | 0.00 |
| <i>Ifitm3</i>                                                                                   | interferon induced transmembrane protein 3                                                                              | 1423754 at   | 4.30 | 0.00 |
| <i>A1447904</i>                                                                                 | expressed sequence A1447904                                                                                             | 1435331 at   | 4.28 | 0.00 |
| <i>Clca1</i>                                                                                    | chloride channel calcium activated 1                                                                                    | 1417852 x at | 4.28 | 0.00 |
| <i>Tlr3</i>                                                                                     | toll-like receptor 3                                                                                                    | 1422782 s at | 4.27 | 0.00 |
| <i>Eif2ak2</i>                                                                                  | eukaryotic translation initiation factor 2-alpha kinase 2                                                               | 1440866 at   | 4.25 | 0.00 |
| <i>Nfkbie</i>                                                                                   | nuclear factor of kappa light polypeptide gene enhancer in B-cells inhibitor, epsilon                                   | 1458299 s at | 4.25 | 0.00 |
| <i>Tgm2</i>                                                                                     | transglutaminase 2, C polypeptide                                                                                       | 1426004 a at | 4.24 | 0.00 |
| <i>Lman1l</i>                                                                                   | lectin, mannose-binding 1 like                                                                                          | 1451922 at   | 4.23 | 0.00 |
| <i>Wars</i>                                                                                     | tryptophanyl-tRNA synthetase                                                                                            | 1415694 at   | 4.22 | 0.00 |
| <i>Ier3</i>                                                                                     | immediate early response 3                                                                                              | 1419647 a at | 4.20 | 0.00 |
| <i>Eif1a</i>                                                                                    | eukaryotic translation initiation factor 1A                                                                             | 1424344 s at | 4.19 | 0.00 |
| <i>Eif2ak2</i>                                                                                  | eukaryotic translation initiation factor 2-alpha kinase 2                                                               | 1422005 at   | 4.16 | 0.00 |
| <i>Ube2l6</i>                                                                                   | ubiquitin-conjugating enzyme E2L 6                                                                                      | 1417172 at   | 4.16 | 0.00 |
| <i>Isgf3g</i>                                                                                   | interferon dependent positive acting transcription factor 3 gamma                                                       | 1421322 a at | 4.15 | 0.00 |
| <i>Ucp3</i>                                                                                     | uncoupling protein 3 (mitochondrial, proton carrier)                                                                    | 1420657 at   | 4.14 | 0.02 |
| <i>Sema3f</i>                                                                                   | sema domain, immunoglobulin domain (Ig), short basic domain, secreted, (semaphorin) 3 F                                 | 1425840_a at | 4.13 | 0.00 |
| <i>Darc</i>                                                                                     | Duffy blood group, chemokine receptor                                                                                   | 1432273 a at | 4.11 | 0.00 |
| <i>Fcgr2b</i>                                                                                   | Fc receptor, IgG, low affinity IIb                                                                                      | 1435477 s at | 4.10 | 0.00 |
| <i>Slc39a14</i>                                                                                 | solute carrier family 39 (zinc transporter), member 14                                                                  | 1438490 at   | 4.08 | 0.00 |
| ---                                                                                             | ---                                                                                                                     | 1430751 at   | 4.07 | 0.00 |
| <i>Nfkbia</i>                                                                                   | nuclear factor of kappa light chain gene enhancer in B-cells inhibitor, alpha                                           | 1448306 at   | 4.07 | 0.00 |
| <i>A130040M12Rik</i>                                                                            | RIKEN cDNA A130040M12 gene                                                                                              | 1435640 x at | 4.04 | 0.00 |
| <i>A130040M12Rik</i>                                                                            | RIKEN cDNA A130040M12 gene                                                                                              | 1428909 at   | 4.03 | 0.00 |
| <i>Uck2</i>                                                                                     | uridine-cytidine kinase 2                                                                                               | 1448604 at   | 4.02 | 0.00 |
| <i>H2-D1</i>                                                                                    | histocompatibility 2, D region locus 1                                                                                  | 1426324 at   | 4.02 | 0.00 |
| <i>H2-T22</i> /// <i>H2-T9</i>                                                                  | histocompatibility 2, T region locus 22 /// histocompatibility 2, T region locus 9                                      | 1449875 s at | 4.02 | 0.00 |
| <i>Zfp36</i>                                                                                    | zinc finger protein 36                                                                                                  | 1452519 a at | 4.00 | 0.00 |
| <i>Myd88</i>                                                                                    | myeloid differentiation primary response gene 88                                                                        | 1419272 at   | 4.00 | 0.00 |
| ---                                                                                             | Transcribed locus                                                                                                       | 1435872 at   | 3.99 | 0.00 |
| <i>Stno</i>                                                                                     | strawberry notch homolog (Drosophila)                                                                                   | 1443721 x at | 3.99 | 0.00 |
| <i>Steap4</i>                                                                                   | STEAP family member 4                                                                                                   | 1460197 a at | 3.98 | 0.00 |
| <i>Cenpj</i>                                                                                    | centromere protein J                                                                                                    | 1437643 at   | 3.98 | 0.00 |
| <i>Serpine1</i>                                                                                 | serine (or cysteine) peptidase inhibitor, clade E, member 1                                                             | 1419149 at   | 3.98 | 0.01 |
| <i>Tmem38b</i>                                                                                  | transmembrane protein 38B                                                                                               | 1424700 at   | 3.97 | 0.00 |
| <i>Slc45a3</i>                                                                                  | solute carrier family 45, member 3                                                                                      | 1426664 x at | 3.97 | 0.00 |
| <i>Cnksr1</i> /// <i>LOC637116</i>                                                              | connector enhancer of kinase suppressor of Ras 1 /// similar to connector enhancer of kinase suppressor of Ras 1        | 1455399_at   | 3.96 | 0.00 |
| <i>B2m</i>                                                                                      | Beta-2 microglobulin                                                                                                    | 1427511 at   | 3.96 | 0.00 |
| <i>Wars</i>                                                                                     | tryptophanyl-tRNA synthetase                                                                                            | 1434813 x at | 3.95 | 0.00 |
| <i>Batf2</i>                                                                                    | basic leucine zipper transcription factor, ATF-like 2                                                                   | 1430005 a at | 3.95 | 0.00 |
| <i>2410006H16Rik</i>                                                                            | RIKEN cDNA 2410006H16 gene                                                                                              | 1447936 at   | 3.95 | 0.00 |
| <i>Irf1</i>                                                                                     | interferon regulatory factor 1                                                                                          | 1448436 a at | 3.94 | 0.00 |
| <i>Cflar</i>                                                                                    | CASP8 and FADD-like apoptosis regulator                                                                                 | 1449317 at   | 3.93 | 0.01 |
| <i>Ogfr</i>                                                                                     | opioid growth factor receptor                                                                                           | 1422512 a at | 3.92 | 0.00 |
| <i>1200015M12Rik</i> /// <i>1200016E24Rik</i> /// <i>A130040M12Rik</i> /// <i>E430024C06Rik</i> | RIKEN cDNA 1200015M12 gene /// RIKEN cDNA 1200016E24 gene /// RIKEN cDNA A130040M12 gene /// RIKEN cDNA E430024C06 gene | 1435137_s at | 3.90 | 0.00 |
| <i>Lv6a</i>                                                                                     | lymphocyte antigen 6 complex, locus A                                                                                   | 1417185 at   | 3.90 | 0.00 |
| <i>Nfkbia</i>                                                                                   | nuclear factor of kappa light chain gene enhancer in B-cells inhibitor, alpha                                           | 1438157 s at | 3.90 | 0.00 |
| <i>Eif1a</i>                                                                                    | eukaryotic translation initiation factor 1A                                                                             | 1424343 a at | 3.87 | 0.00 |
| ---                                                                                             | Transcribed locus                                                                                                       | 1441150 x at | 3.86 | 0.00 |
| <i>Cyp7b1</i>                                                                                   | cytochrome P450, family 7, subfamily b, polypeptide 1                                                                   | 1421075 s at | 3.85 | 0.00 |
| <i>Mcoln2</i>                                                                                   | mucoilin 2                                                                                                              | 1431705 a at | 3.84 | 0.00 |
| <i>Mx2</i>                                                                                      | myxovirus (influenza virus) resistance 2                                                                                | 1419676 at   | 3.84 | 0.00 |
| <i>Ifi205</i> /// <i>Mnda</i>                                                                   | interferon activated gene 205 /// myeloid cell nuclear differentiation antigen                                          | 1452349 x at | 3.84 | 0.00 |
| <i>0610011104Rik</i>                                                                            | RIKEN cDNA 0610011104 gene                                                                                              | 1425603 at   | 3.84 | 0.00 |
| <i>Shrm</i>                                                                                     | shroom                                                                                                                  | 1454211 a at | 3.81 | 0.00 |
| <i>Pim1</i>                                                                                     | proviral integration site 1                                                                                             | 1435458 at   | 3.80 | 0.00 |

|                                                                                                                                                       |                                                                                                                                                                                                                                                                                                                                                                                                                                                                          |              |      |      |
|-------------------------------------------------------------------------------------------------------------------------------------------------------|--------------------------------------------------------------------------------------------------------------------------------------------------------------------------------------------------------------------------------------------------------------------------------------------------------------------------------------------------------------------------------------------------------------------------------------------------------------------------|--------------|------|------|
| <i>Ifi203</i> /// <i>Ifi204</i> /// <i>LOC192690</i> /// <i>Ifi205</i> /// <i>Mnda</i> /// <i>LOC640890</i> /// <i>LOC672547</i> /// <i>LOC677184</i> | interferon activated gene 203 /// interferon activated gene 204 /// similar to interferon activated gene 205 /// interferon activated gene 205 /// myeloid cell nuclear differentiation antigen /// similar to Interferon-activatable protein 205 (IFI-205) (D3 protein) /// similar to Interferon-activatable protein 204 (Ifi-204) (Interferon-inducible protein p204) /// similar to Interferon-activatable protein 204 (Ifi-204) (Interferon-inducible protein p204) | 1452348_s_at | 3.80 | 0.00 |
| <i>Psat1</i>                                                                                                                                          | phosphoserine aminotransferase 1                                                                                                                                                                                                                                                                                                                                                                                                                                         | 1454607_s_at | 3.77 | 0.00 |
| <i>2310030G06Rik</i>                                                                                                                                  | RIKEN cDNA 2310030G06 gene                                                                                                                                                                                                                                                                                                                                                                                                                                               | 1449357_at   | 3.77 | 0.00 |
| <i>Bst1</i>                                                                                                                                           | bone marrow stromal cell antigen 1                                                                                                                                                                                                                                                                                                                                                                                                                                       | 1449453_at   | 3.76 | 0.00 |
| <i>Car4</i>                                                                                                                                           | carbonic anhydrase 4                                                                                                                                                                                                                                                                                                                                                                                                                                                     | 1418094_s_at | 3.75 | 0.00 |
| <i>Fas</i>                                                                                                                                            | Fas (TNF receptor superfamily member)                                                                                                                                                                                                                                                                                                                                                                                                                                    | 1460251_at   | 3.75 | 0.00 |
| <i>Bcl2a1a</i> /// <i>Bcl2a1b</i> /// <i>Bcl2a1d</i>                                                                                                  | B-cell leukemia/lymphoma 2 related protein A1a /// B-cell leukemia/lymphoma 2 related protein A1b /// B-cell leukemia/lymphoma 2 related protein A1d                                                                                                                                                                                                                                                                                                                     | 1419004_s_at | 3.74 | 0.00 |
| <i>Cebpb</i>                                                                                                                                          | CCAAT/enhancer binding protein (C/EBP), beta                                                                                                                                                                                                                                                                                                                                                                                                                             | 1427844_a_at | 3.72 | 0.00 |
| <i>Ccr12</i>                                                                                                                                          | chemokine (C-C motif) receptor-like 2                                                                                                                                                                                                                                                                                                                                                                                                                                    | 1427736_a_at | 3.71 | 0.01 |
| <i>1110025F24Rik</i>                                                                                                                                  | RIKEN cDNA 1110025F24 gene                                                                                                                                                                                                                                                                                                                                                                                                                                               | 1430530_s_at | 3.69 | 0.00 |
| <i>Fmn12</i>                                                                                                                                          | formin-like 2                                                                                                                                                                                                                                                                                                                                                                                                                                                            | 1428579_at   | 3.69 | 0.00 |
| <i>Uck2</i>                                                                                                                                           | uridine-cytidine kinase 2                                                                                                                                                                                                                                                                                                                                                                                                                                                | 1439740_s_at | 3.69 | 0.00 |
| <i>Cxcl1</i>                                                                                                                                          | chemokine (C-X-C motif) ligand 1                                                                                                                                                                                                                                                                                                                                                                                                                                         | 1441855_x_at | 3.67 | 0.00 |
| <i>Nfkb1a</i>                                                                                                                                         | Nuclear factor of kappa light chain gene enhancer in B-cells inhibitor, alpha                                                                                                                                                                                                                                                                                                                                                                                            | 1420089_at   | 3.66 | 0.00 |
| <i>1200003110Rik</i> /// <i>1200015M12Rik</i> /// <i>1200016E24Rik</i> /// <i>A130040M12Rik</i> /// <i>E430024C06Rik</i>                              | RIKEN cDNA 1200003110 gene /// RIKEN cDNA 1200015M12 gene /// RIKEN cDNA 1200016E24 gene /// RIKEN cDNA A130040M12 gene /// RIKEN cDNA E430024C06 gene                                                                                                                                                                                                                                                                                                                   | 1427932_s_at | 3.65 | 0.00 |
| <i>Car4</i>                                                                                                                                           | carbonic anhydrase 4                                                                                                                                                                                                                                                                                                                                                                                                                                                     | 1448949_at   | 3.65 | 0.00 |
| <i>Pde4b</i>                                                                                                                                          | phosphodiesterase 4B, cAMP specific                                                                                                                                                                                                                                                                                                                                                                                                                                      | 1442700_at   | 3.64 | 0.01 |
| <i>4833442J19Rik</i>                                                                                                                                  | RIKEN cDNA 4833442J19 gene                                                                                                                                                                                                                                                                                                                                                                                                                                               | 1427202_at   | 3.64 | 0.00 |
| <i>Clic4</i>                                                                                                                                          | chloride intracellular channel 4 (mitochondrial)                                                                                                                                                                                                                                                                                                                                                                                                                         | 1423392_at   | 3.61 | 0.01 |
| <i>Pvr</i>                                                                                                                                            | poliovirus receptor                                                                                                                                                                                                                                                                                                                                                                                                                                                      | 1423904_a_at | 3.60 | 0.00 |
| <i>Capp</i>                                                                                                                                           | capping protein (actin filament), gelsolin-like                                                                                                                                                                                                                                                                                                                                                                                                                          | 1450355_a_at | 3.60 | 0.00 |
| <i>4930513N20Rik</i>                                                                                                                                  | RIKEN cDNA 4930513N20 gene                                                                                                                                                                                                                                                                                                                                                                                                                                               | 1433148_at   | 3.57 | 0.00 |
| <i>Anxa7</i>                                                                                                                                          | annexin A7                                                                                                                                                                                                                                                                                                                                                                                                                                                               | 1416137_at   | 3.57 | 0.00 |
| <i>Axud1</i>                                                                                                                                          | AXIN1 up-regulated 1                                                                                                                                                                                                                                                                                                                                                                                                                                                     | 1434350_at   | 3.57 | 0.00 |
| <i>Abhd1</i>                                                                                                                                          | abhydrolase domain containing 1                                                                                                                                                                                                                                                                                                                                                                                                                                          | 1418148_at   | 3.56 | 0.00 |
| <i>Tmem23</i>                                                                                                                                         | transmembrane protein 23                                                                                                                                                                                                                                                                                                                                                                                                                                                 | 1426575_at   | 3.56 | 0.00 |
| <i>1110067D22Rik</i>                                                                                                                                  | RIKEN cDNA 1110067D22 gene                                                                                                                                                                                                                                                                                                                                                                                                                                               | 1424318_at   | 3.56 | 0.00 |
| <i>B2m</i>                                                                                                                                            | beta-2 microglobulin                                                                                                                                                                                                                                                                                                                                                                                                                                                     | 1449289_a_at | 3.55 | 0.00 |
| <i>Spr1a</i>                                                                                                                                          | small proline-rich protein 1A                                                                                                                                                                                                                                                                                                                                                                                                                                            | 1449133_at   | 3.55 | 0.02 |
| <i>Gcnt2</i>                                                                                                                                          | glucosaminyl (N-acetyl) transferase 2, I-branching enzyme                                                                                                                                                                                                                                                                                                                                                                                                                | 1425503_at   | 3.54 | 0.00 |
| <i>Gna13</i>                                                                                                                                          | guanine nucleotide binding protein, alpha 13                                                                                                                                                                                                                                                                                                                                                                                                                             | 1430295_at   | 3.53 | 0.00 |
| <i>Trim21</i>                                                                                                                                         | tripartite motif protein 21                                                                                                                                                                                                                                                                                                                                                                                                                                              | 1418077_at   | 3.53 | 0.00 |
| <i>Adfp</i>                                                                                                                                           | adipose differentiation related protein                                                                                                                                                                                                                                                                                                                                                                                                                                  | 1448318_at   | 3.52 | 0.00 |
| <i>Prkce</i>                                                                                                                                          | Protein kinase C, epsilon                                                                                                                                                                                                                                                                                                                                                                                                                                                | 1444649_at   | 3.52 | 0.00 |
| <i>AA408556</i>                                                                                                                                       | expressed sequence AA408556                                                                                                                                                                                                                                                                                                                                                                                                                                              | 1434239_at   | 3.52 | 0.00 |
| <i>Snord22</i>                                                                                                                                        | small nucleolar RNA, C/D box 22                                                                                                                                                                                                                                                                                                                                                                                                                                          | 1433674_a_at | 3.52 | 0.00 |
| <i>Gm1960</i>                                                                                                                                         | gene model 1960, (NCBI)                                                                                                                                                                                                                                                                                                                                                                                                                                                  | 1438148_at   | 3.51 | 0.00 |
| ---                                                                                                                                                   | Adult male bone cDNA, RIKEN full-length enriched library, clone:9830165G24 product:unclassifiable, full insert sequence                                                                                                                                                                                                                                                                                                                                                  | 1457824_at   | 3.50 | 0.00 |
| <i>Pim3</i>                                                                                                                                           | proviral integration site 3                                                                                                                                                                                                                                                                                                                                                                                                                                              | 1451069_at   | 3.50 | 0.00 |
| <i>Adams1</i>                                                                                                                                         | a disintegrin-like and metalloproteinase (reprolysin type) with thrombospondin type 1 motif, 1                                                                                                                                                                                                                                                                                                                                                                           | 1450716_at   | 3.49 | 0.01 |
| <i>B2m</i>                                                                                                                                            | beta-2 microglobulin                                                                                                                                                                                                                                                                                                                                                                                                                                                     | 1452428_a_at | 3.49 | 0.00 |
| <i>Wars</i>                                                                                                                                           | tryptophanyl-tRNA synthetase                                                                                                                                                                                                                                                                                                                                                                                                                                             | 1437832_x_at | 3.48 | 0.00 |
| ---                                                                                                                                                   | ---                                                                                                                                                                                                                                                                                                                                                                                                                                                                      | 1420273_x_at | 3.48 | 0.00 |
| <i>Maff</i>                                                                                                                                           | v-maf musculoaponeurotic fibrosarcoma oncogene family, protein F (avian)                                                                                                                                                                                                                                                                                                                                                                                                 | 1418936_at   | 3.47 | 0.00 |
| ---                                                                                                                                                   | ---                                                                                                                                                                                                                                                                                                                                                                                                                                                                      | 1420272_at   | 3.47 | 0.00 |
| <i>Sele</i>                                                                                                                                           | selectin, endothelial cell                                                                                                                                                                                                                                                                                                                                                                                                                                               | 1421712_at   | 3.47 | 0.00 |
| <i>Ms4a6c</i>                                                                                                                                         | membrane-spanning 4-domains, subfamily A, member 6C                                                                                                                                                                                                                                                                                                                                                                                                                      | 1450234_at   | 3.46 | 0.00 |
| <i>Lbp</i>                                                                                                                                            | lipopolysaccharide binding protein                                                                                                                                                                                                                                                                                                                                                                                                                                       | 1448550_at   | 3.45 | 0.00 |
| ---                                                                                                                                                   | ---                                                                                                                                                                                                                                                                                                                                                                                                                                                                      | 1421326_at   | 3.44 | 0.00 |
| <i>Nfe2l2</i>                                                                                                                                         | nuclear factor, erythroid derived 2, like 2                                                                                                                                                                                                                                                                                                                                                                                                                              | 1457117_at   | 3.44 | 0.00 |
| <i>1110067D22Rik</i>                                                                                                                                  | RIKEN cDNA 1110067D22 gene                                                                                                                                                                                                                                                                                                                                                                                                                                               | 1451313_a_at | 3.43 | 0.00 |
| <i>Phf15</i>                                                                                                                                          | PHD finger protein 15                                                                                                                                                                                                                                                                                                                                                                                                                                                    | 1455345_at   | 3.43 | 0.00 |
| <i>Mgst1</i>                                                                                                                                          | microsomal glutathione S-transferase 1                                                                                                                                                                                                                                                                                                                                                                                                                                   | 1415897_a_at | 3.43 | 0.00 |
| <i>6330412F12Rik</i>                                                                                                                                  | RIKEN cDNA 6330412F12 gene                                                                                                                                                                                                                                                                                                                                                                                                                                               | 1452777_a_at | 3.42 | 0.00 |
| <i>Clec4e</i>                                                                                                                                         | C-type lectin domain family 4, member e                                                                                                                                                                                                                                                                                                                                                                                                                                  | 1420330_at   | 3.42 | 0.00 |
| <i>Trim21</i>                                                                                                                                         | tripartite motif protein 21                                                                                                                                                                                                                                                                                                                                                                                                                                              | 1448940_at   | 3.42 | 0.00 |
| <i>Adar</i>                                                                                                                                           | adenosine deaminase, RNA-specific                                                                                                                                                                                                                                                                                                                                                                                                                                        | 1425405_a_at | 3.41 | 0.00 |
| ---                                                                                                                                                   | ---                                                                                                                                                                                                                                                                                                                                                                                                                                                                      | 1456544_at   | 3.40 | 0.00 |
| <i>Chi3l3</i> /// <i>Chi3l4</i>                                                                                                                       | chitinase 3-like 3 /// chitinase 3-like 4                                                                                                                                                                                                                                                                                                                                                                                                                                | 1425451_s_at | 3.40 | 0.00 |
| <i>Efh2</i>                                                                                                                                           | EF hand domain containing 2                                                                                                                                                                                                                                                                                                                                                                                                                                              | 1431339_a_at | 3.40 | 0.00 |
| <i>Psat1</i>                                                                                                                                          | phosphoserine aminotransferase 1                                                                                                                                                                                                                                                                                                                                                                                                                                         | 1451064_a_at | 3.39 | 0.00 |
| <i>Pdk4</i>                                                                                                                                           | pyruvate dehydrogenase kinase, isoenzyme 4                                                                                                                                                                                                                                                                                                                                                                                                                               | 1417273_at   | 3.39 | 0.00 |
| <i>Arrdc4</i>                                                                                                                                         | arrestin domain containing 4                                                                                                                                                                                                                                                                                                                                                                                                                                             | 1424759_at   | 3.39 | 0.00 |
| <i>Asns</i>                                                                                                                                           | asparagine synthetase                                                                                                                                                                                                                                                                                                                                                                                                                                                    | 1433966_x_at | 3.38 | 0.00 |
| <i>Tor3a</i>                                                                                                                                          | torsin family 3, member A                                                                                                                                                                                                                                                                                                                                                                                                                                                | 1428660_s_at | 3.38 | 0.00 |
| <i>2810474O19Rik</i>                                                                                                                                  | RIKEN cDNA 2810474O19 gene                                                                                                                                                                                                                                                                                                                                                                                                                                               | 1452397_at   | 3.38 | 0.00 |
| <i>Parp14</i>                                                                                                                                         | poly (ADP-ribose) polymerase family, member 14                                                                                                                                                                                                                                                                                                                                                                                                                           | 1432548_at   | 3.37 | 0.00 |
| <i>Dtna</i>                                                                                                                                           | dystrobrevin alpha                                                                                                                                                                                                                                                                                                                                                                                                                                                       | 1419223_a_at | 3.37 | 0.00 |
| <i>C2</i>                                                                                                                                             | Complement component 2 (within H-2S)                                                                                                                                                                                                                                                                                                                                                                                                                                     | 1457664_x_at | 3.37 | 0.00 |
| <i>1200002N14Rik</i>                                                                                                                                  | RIKEN cDNA 1200002N14 gene                                                                                                                                                                                                                                                                                                                                                                                                                                               | 1424524_at   | 3.36 | 0.00 |
| <i>Shrm</i>                                                                                                                                           | shroom                                                                                                                                                                                                                                                                                                                                                                                                                                                                   | 1422629_s_at | 3.35 | 0.00 |
| <i>Tgm2</i>                                                                                                                                           | transglutaminase 2, C polypeptide                                                                                                                                                                                                                                                                                                                                                                                                                                        | 1417500_a_at | 3.35 | 0.00 |
| ---                                                                                                                                                   | ---                                                                                                                                                                                                                                                                                                                                                                                                                                                                      | 1446346_at   | 3.34 | 0.00 |
| <i>Il4ra</i>                                                                                                                                          | interleukin 4 receptor, alpha                                                                                                                                                                                                                                                                                                                                                                                                                                            | 1421034_a_at | 3.34 | 0.00 |
| <i>5133401N09Rik</i>                                                                                                                                  | RIKEN cDNA 5133401N09 gene                                                                                                                                                                                                                                                                                                                                                                                                                                               | 1424496_at   | 3.34 | 0.00 |
| <i>Slc39a14</i>                                                                                                                                       | solute carrier family 39 (zinc transporter), member 14                                                                                                                                                                                                                                                                                                                                                                                                                   | 1425649_at   | 3.34 | 0.00 |
| <i>Cspg2</i>                                                                                                                                          | chondroitin sulfate proteoglycan 2                                                                                                                                                                                                                                                                                                                                                                                                                                       | 1421694_a_at | 3.33 | 0.00 |
| <i>Hcls1</i>                                                                                                                                          | hematopoietic cell specific Lyn substrate 1                                                                                                                                                                                                                                                                                                                                                                                                                              | 1418842_at   | 3.33 | 0.00 |
| <i>Cxcl14</i>                                                                                                                                         | chemokine (C-X-C motif) ligand 14                                                                                                                                                                                                                                                                                                                                                                                                                                        | 1418457_at   | 3.33 | 0.00 |
| <i>Cebpb</i>                                                                                                                                          | CCAAT/enhancer binding protein (C/EBP), beta                                                                                                                                                                                                                                                                                                                                                                                                                             | 1418901_at   | 3.32 | 0.00 |
| <i>2810474O19Rik</i>                                                                                                                                  | RIKEN cDNA 2810474O19 gene                                                                                                                                                                                                                                                                                                                                                                                                                                               | 1429588_at   | 3.32 | 0.00 |
| <i>Tmem23</i>                                                                                                                                         | transmembrane protein 23                                                                                                                                                                                                                                                                                                                                                                                                                                                 | 1426576_at   | 3.30 | 0.00 |
| <i>H2-L</i>                                                                                                                                           | histocompatibility 2, D region                                                                                                                                                                                                                                                                                                                                                                                                                                           | 1451931_x_at | 3.30 | 0.00 |
| <i>Tmem23</i>                                                                                                                                         | transmembrane protein 23                                                                                                                                                                                                                                                                                                                                                                                                                                                 | 1436499_at   | 3.30 | 0.00 |
| ---                                                                                                                                                   | ---                                                                                                                                                                                                                                                                                                                                                                                                                                                                      | 1455965_at   | 3.29 | 0.00 |



|                                                                              |                                                                                                                                                                                                                                                             |              |      |      |
|------------------------------------------------------------------------------|-------------------------------------------------------------------------------------------------------------------------------------------------------------------------------------------------------------------------------------------------------------|--------------|------|------|
| 3930401B19Rik ///<br>1200016E24Rik ///<br>A130040M12Rik ///<br>E430024C06Rik | RIKEN cDNA 3930401B19 gene /// RIKEN cDNA 1200016E24 gene /// RIKEN cDNA<br>A130040M12 gene /// RIKEN cDNA E430024C06 gene                                                                                                                                  | 1453238_s_at | 3.29 | 0.00 |
| <i>Ada</i>                                                                   | adenosine deaminase                                                                                                                                                                                                                                         | 1417976_at   | 3.28 | 0.00 |
| <i>Cxcl16</i>                                                                | chemokine (C-X-C motif) ligand 16                                                                                                                                                                                                                           | 1449195_s_at | 3.28 | 0.00 |
| <i>Pim3</i>                                                                  | proviral integration site 3                                                                                                                                                                                                                                 | 1437100_x_at | 3.28 | 0.00 |
| <i>Il1rn</i>                                                                 | interleukin 1 receptor antagonist                                                                                                                                                                                                                           | 1451798_at   | 3.28 | 0.00 |
| <i>Arrdc2</i>                                                                | arrestin domain containing 2                                                                                                                                                                                                                                | 1428352_at   | 3.27 | 0.00 |
| 5230400M03Rik                                                                | RIKEN cDNA 5230400M03 gene                                                                                                                                                                                                                                  | 1441843_s_at | 3.26 | 0.00 |
| <i>Ms4a6b</i>                                                                | membrane-spanning 4-domains, subfamily A, member 6B                                                                                                                                                                                                         | 1418826_at   | 3.26 | 0.00 |
| <i>Tgm2</i>                                                                  | transglutaminase 2, C polypeptide                                                                                                                                                                                                                           | 1455900_x_at | 3.26 | 0.00 |
| <i>Tiparp</i>                                                                | TCDD-inducible poly(ADP-ribose) polymerase                                                                                                                                                                                                                  | 1452160_at   | 3.25 | 0.00 |
| <i>Trim68</i>                                                                | tripartite motif containing 68                                                                                                                                                                                                                              | 1455124_at   | 3.25 | 0.00 |
| <i>Tinagl</i>                                                                | tubulointerstitial nephritis antigen-like                                                                                                                                                                                                                   | 1417109_at   | 3.25 | 0.00 |
| <i>Irf8</i>                                                                  | interferon regulatory factor 8                                                                                                                                                                                                                              | 1448452_at   | 3.24 | 0.01 |
| <i>Sell</i>                                                                  | selectin, lymphocyte                                                                                                                                                                                                                                        | 1419480_at   | 3.24 | 0.00 |
| <i>Fmn12</i>                                                                 | Formin-like 2                                                                                                                                                                                                                                               | 1446245_at   | 3.23 | 0.00 |
| <i>Ms4a4c</i>                                                                | membrane-spanning 4-domains, subfamily A, member 4C                                                                                                                                                                                                         | 1420671_x_at | 3.23 | 0.00 |
| <i>Efh2</i>                                                                  | EF hand domain containing 2                                                                                                                                                                                                                                 | 1437478_s_at | 3.22 | 0.00 |
| E030010A14Rik                                                                | RIKEN cDNA E030010A14 gene                                                                                                                                                                                                                                  | 1437595_at   | 3.22 | 0.00 |
| <i>Lgals9</i>                                                                | lectin, galactose binding, soluble 9                                                                                                                                                                                                                        | 1421217_a_at | 3.22 | 0.00 |
| <i>Herc5</i>                                                                 | hect domain and RLD 5                                                                                                                                                                                                                                       | 1431095_a_at | 3.21 | 0.00 |
| <i>Serpinb9</i>                                                              | serine (or cysteine) peptidase inhibitor, clade B, member 9                                                                                                                                                                                                 | 1422601_at   | 3.20 | 0.00 |
| <i>Rtp4</i>                                                                  | receptor transporter protein 4                                                                                                                                                                                                                              | 1449143_at   | 3.20 | 0.00 |
| <i>Soat1</i>                                                                 | Sterol O-acyltransferase 1                                                                                                                                                                                                                                  | 1426818_at   | 3.20 | 0.00 |
| <i>Ifitm6</i>                                                                | interferon induced transmembrane protein 6                                                                                                                                                                                                                  | 1440865_at   | 3.20 | 0.00 |
| <i>Mtus1</i>                                                                 | mitochondrial tumor suppressor 1                                                                                                                                                                                                                            | 1436502_at   | 3.20 | 0.00 |
| <i>Ddx58</i>                                                                 | DEAD (Asp-Glu-Ala-Asp) box polypeptide 58                                                                                                                                                                                                                   | 1456890_at   | 3.20 | 0.00 |
| <i>Myp</i>                                                                   | major vault protein                                                                                                                                                                                                                                         | 1456586_x_at | 3.19 | 0.00 |
| <i>Steap2</i>                                                                | six transmembrane epithelial antigen of prostate 2                                                                                                                                                                                                          | 1428636_at   | 3.19 | 0.00 |
| <i>Lgals3</i>                                                                | lectin, galactose binding, soluble 3                                                                                                                                                                                                                        | 1426808_at   | 3.19 | 0.00 |
| <i>Myp</i>                                                                   | major vault protein                                                                                                                                                                                                                                         | 1448618_at   | 3.19 | 0.00 |
| <i>Jmjd1c</i>                                                                | Jumonji domain containing 1C                                                                                                                                                                                                                                | 1441592_at   | 3.18 | 0.01 |
| <i>Tgm2</i>                                                                  | transglutaminase 2, C polypeptide                                                                                                                                                                                                                           | 1437277_x_at | 3.17 | 0.00 |
| C730049O14Rik                                                                | RIKEN cDNA C730049O14 gene                                                                                                                                                                                                                                  | 1435084_at   | 3.17 | 0.00 |
| <i>Gvin1</i>                                                                 | GTPase, very large interferon inducible 1                                                                                                                                                                                                                   | 1429184_at   | 3.17 | 0.00 |
| <i>Glul</i>                                                                  | glutamate-ammonia ligase (glutamine synthetase)                                                                                                                                                                                                             | 1426235_a_at | 3.17 | 0.00 |
| <i>Fbxo31</i>                                                                | F-box only protein 31                                                                                                                                                                                                                                       | 1417969_at   | 3.16 | 0.00 |
| <i>Cblb</i>                                                                  | Casitas B-lineage lymphoma b                                                                                                                                                                                                                                | 1455082_at   | 3.15 | 0.00 |
| <i>Ucp2</i>                                                                  | uncoupling protein 2 (mitochondrial, proton carrier)                                                                                                                                                                                                        | 1459740_s_at | 3.15 | 0.00 |
| <i>Marcks11</i>                                                              | MARCKS-like 1                                                                                                                                                                                                                                               | 1437226_x_at | 3.14 | 0.00 |
| <i>Shrm</i>                                                                  | shroom                                                                                                                                                                                                                                                      | 1451854_a_at | 3.14 | 0.00 |
| H2-D1 /// H2-L /// LOC547343 ///<br>LOC636948                                | histocompatibility 2, D region locus 1 /// histocompatibility 2, D region /// similar to H-2<br>class I histocompatibility antigen, L-D alpha chain precursor /// similar to H-2 class I<br>histocompatibility antigen, D-B alpha chain precursor (H-2D(B)) | 1451784_x_at | 3.13 | 0.00 |
| <i>A1426953</i>                                                              | expressed sequence A1426953                                                                                                                                                                                                                                 | 1442018_at   | 3.13 | 0.01 |
| <i>Tiparp</i>                                                                | TCDD-inducible poly(ADP-ribose) polymerase                                                                                                                                                                                                                  | 1426721_s_at | 3.12 | 0.00 |
| <i>Gpr133</i> /// LOC669205                                                  | G protein-coupled receptor 133 /// similar to G protein-coupled receptor 133                                                                                                                                                                                | 1455466_at   | 3.12 | 0.00 |
| <i>Ear2</i>                                                                  | eosinophil-associated, ribonuclease A family, member 2                                                                                                                                                                                                      | 1449846_at   | 3.11 | 0.00 |
| <i>Itg2</i>                                                                  | integrin beta 2                                                                                                                                                                                                                                             | 1450678_at   | 3.10 | 0.00 |
| 4732416N19Rik                                                                | RIKEN cDNA 4732416N19 gene                                                                                                                                                                                                                                  | 1435261_at   | 3.10 | 0.00 |
| <i>Smo</i>                                                                   | strawberry notch homolog (Drosophila)                                                                                                                                                                                                                       | 1439349_at   | 3.10 | 0.00 |
| <i>Ctsl</i>                                                                  | cathepsin L                                                                                                                                                                                                                                                 | 1451310_a_at | 3.10 | 0.00 |
| 2210403K04Rik                                                                | RIKEN cDNA 2210403K04 gene                                                                                                                                                                                                                                  | 1428562_at   | 3.09 | 0.02 |
| <i>Ptp4a1</i>                                                                | protein tyrosine phosphatase 4a1                                                                                                                                                                                                                            | 1455002_at   | 3.09 | 0.00 |
| <i>Gna13</i>                                                                 | guanine nucleotide binding protein, alpha 13                                                                                                                                                                                                                | 1453470_a_at | 3.09 | 0.00 |
| <i>Asah3l</i>                                                                | N-acylsphingosine amidohydrolase 3-like                                                                                                                                                                                                                     | 1451355_at   | 3.07 | 0.00 |
| H2-D1                                                                        | histocompatibility 2, D region locus 1                                                                                                                                                                                                                      | 1425545_x_at | 3.07 | 0.00 |
| <i>Litaf</i>                                                                 | LPS-induced TN factor                                                                                                                                                                                                                                       | 1416303_at   | 3.07 | 0.00 |
| <i>Snord22</i>                                                               | small nucleolar RNA, C/D box 22                                                                                                                                                                                                                             | 1439399_a_at | 3.07 | 0.00 |
| <i>Relb</i>                                                                  | avian reticuloendotheliosis viral (v-rel) oncogene related B                                                                                                                                                                                                | 1417856_at   | 3.07 | 0.00 |
| <i>Ogfr</i>                                                                  | opioid growth factor receptor                                                                                                                                                                                                                               | 1422511_a_at | 3.06 | 0.00 |
| <i>Tbk1</i>                                                                  | TANK-binding kinase 1                                                                                                                                                                                                                                       | 1422469_at   | 3.06 | 0.00 |
| <i>St3gal1</i>                                                               | ST3 beta-galactoside alpha-2,3-sialyltransferase 1                                                                                                                                                                                                          | 1418946_at   | 3.04 | 0.00 |
| <i>Pap</i>                                                                   | pancreatitis-associated protein                                                                                                                                                                                                                             | 1416297_s_at | 3.04 | 0.00 |
| <i>Acot1</i>                                                                 | acyl-CoA thioesterase 1                                                                                                                                                                                                                                     | 1449065_at   | 3.04 | 0.00 |
| <i>Psm2</i>                                                                  | proteasome (prosome, macropain) 28 subunit, beta                                                                                                                                                                                                            | 1417189_at   | 3.04 | 0.00 |
| <i>Rasd1</i>                                                                 | RAS, dexamethasone-induced 1                                                                                                                                                                                                                                | 1423619_at   | 3.03 | 0.00 |
| <i>Cd38</i>                                                                  | CD38 antigen                                                                                                                                                                                                                                                | 1433741_at   | 3.03 | 0.00 |
| D18Erid232e                                                                  | DNA segment, Chr 18, ERATO Doi 232, expressed                                                                                                                                                                                                               | 1441115_at   | 3.03 | 0.00 |
| <i>Bcl3</i>                                                                  | B-cell leukemia/lymphoma 3                                                                                                                                                                                                                                  | 1418133_at   | 3.03 | 0.00 |
| <i>Il2rg</i>                                                                 | interleukin 2 receptor, gamma chain                                                                                                                                                                                                                         | 1416295_a_at | 3.02 | 0.00 |
| <i>Igsf6</i>                                                                 | immunoglobulin superfamily, member 6                                                                                                                                                                                                                        | 1421408_at   | 3.01 | 0.00 |
| <i>Nfkb1a</i>                                                                | nuclear factor of kappa light chain gene enhancer in B-cells inhibitor, alpha                                                                                                                                                                               | 1420088_at   | 2.99 | 0.00 |
| <i>Snord22</i>                                                               | small nucleolar RNA, C/D box 22                                                                                                                                                                                                                             | 1433675_at   | 2.99 | 0.00 |
| <i>Gprc5b</i>                                                                | G protein-coupled receptor, family C, group 5, member B                                                                                                                                                                                                     | 1424613_at   | 2.99 | 0.00 |
| <i>Irak3</i>                                                                 | interleukin-1 receptor-associated kinase 3                                                                                                                                                                                                                  | 1430704_at   | 2.98 | 0.00 |
| <i>Hamp1</i>                                                                 | hepcidin antimicrobial peptide 1                                                                                                                                                                                                                            | 1419197_x_at | 2.98 | 0.00 |
| <i>Tgm2</i>                                                                  | transglutaminase 2, C polypeptide                                                                                                                                                                                                                           | 1433428_x_at | 2.98 | 0.00 |
| <i>Sln2</i>                                                                  | schlafen 2                                                                                                                                                                                                                                                  | 1450165_at   | 2.97 | 0.00 |
| <i>Fcgr1</i>                                                                 | Fc receptor, IgG, high affinity 1                                                                                                                                                                                                                           | 1417876_at   | 2.97 | 0.00 |
| 1110008H02Rik                                                                | RIKEN cDNA 1110008H02 gene                                                                                                                                                                                                                                  | 1436506_a_at | 2.97 | 0.00 |
| <i>Abcc3</i>                                                                 | ATP-binding cassette, sub-family C (CFTR/MRP), member 3                                                                                                                                                                                                     | 1428988_at   | 2.96 | 0.00 |
| 4732473B16Rik                                                                | RIKEN cDNA 4732473B16 gene                                                                                                                                                                                                                                  | 1433877_at   | 2.96 | 0.00 |
| <i>Fkbp5</i>                                                                 | FK506 binding protein 5                                                                                                                                                                                                                                     | 1458089_at   | 2.96 | 0.00 |
| <i>Traf41</i>                                                                | TRAF type zinc finger domain containing 1                                                                                                                                                                                                                   | 1428346_at   | 2.95 | 0.00 |
| <i>Klhl2</i>                                                                 | kelch-like 2, Mayven (Drosophila)                                                                                                                                                                                                                           | 1458351_s_at | 2.95 | 0.02 |
| <i>C4b</i> /// LOC675521                                                     | complement component 4B (Childo blood group) /// similar to Complement C4 precursor                                                                                                                                                                         | 1418021_at   | 2.94 | 0.00 |
| <i>Fcgr2b</i>                                                                | Fc receptor, IgG, low affinity IIb                                                                                                                                                                                                                          | 1451941_a_at | 2.94 | 0.00 |
| <i>Adh1</i>                                                                  | alcohol dehydrogenase 1 (class I)                                                                                                                                                                                                                           | 1416225_at   | 2.93 | 0.00 |
| <i>Isg20</i>                                                                 | interferon-stimulated protein                                                                                                                                                                                                                               | 1419569_a_at | 2.92 | 0.00 |
| 2810474O19Rik                                                                | RIKEN cDNA 2810474O19 gene                                                                                                                                                                                                                                  | 1427334_s_at | 2.92 | 0.13 |
| A1649393                                                                     | expressed sequence A1649393                                                                                                                                                                                                                                 | 1439050_at   | 2.91 | 0.00 |
| <i>Adams9</i>                                                                | a disintegrin-like and metalloproteinase (reprolysin type) with thrombospondin type 1<br>motif, 9                                                                                                                                                           | 1431399_at   | 2.91 | 0.03 |
| <i>Pvr</i>                                                                   | poliovirus receptor                                                                                                                                                                                                                                         | 1423903_at   | 2.91 | 0.00 |

|                           |                                                                                                                          |              |      |      |
|---------------------------|--------------------------------------------------------------------------------------------------------------------------|--------------|------|------|
| <i>Pml</i>                | promyelocytic leukemia                                                                                                   | 1459137 at   | 2.91 | 0.00 |
| <i>Rnf125</i>             | ring finger protein 125                                                                                                  | 1429399 at   | 2.90 | 0.00 |
| <i>Cblb</i>               | Casitas B-lineage lymphoma b                                                                                             | 1458469 at   | 2.90 | 0.00 |
| <i>Tgoln1</i>             | trans-golgi network protein                                                                                              | 1418520 at   | 2.90 | 0.00 |
| <i>Uap1 /// LOC640502</i> | UDP-N-acetylglucosamine pyrophosphorylase 1 /// similar to UDP-N-acetylhexosamine pyrophosphorylase                      | 1456516_x_at | 2.90 | 0.00 |
| <i>Rrad</i>               | Ras-related associated with diabetes                                                                                     | 1422562 at   | 2.89 | 0.00 |
| <i>Ucp3</i>               | uncoupling protein 3 (mitochondrial, proton carrier)                                                                     | 1420658 at   | 2.89 | 0.00 |
| <i>1200009106Rik</i>      | RIKEN cDNA 1200009106 gene                                                                                               | 1428420 a at | 2.89 | 0.00 |
| <i>Bzrp</i>               | benzodiazepine receptor, peripheral                                                                                      | 1456251 x at | 2.89 | 0.00 |
| <i>Sult1a1</i>            | sulfotransferase family 1A, phenol-preferring, member 1                                                                  | 1427345 a at | 2.89 | 0.00 |
| <i>Ptprf</i>              | protein tyrosine phosphatase, receptor type, F                                                                           | 1420842 at   | 2.89 | 0.00 |
| <i>Msr1</i>               | macrophage scavenger receptor 1                                                                                          | 1422062 at   | 2.88 | 0.00 |
| <i>Fads3</i>              | fatty acid desaturase 3                                                                                                  | 1418773 at   | 2.88 | 0.00 |
| <i>Hamp1</i>              | hepcidin antimicrobial peptide 1                                                                                         | 1419196 at   | 2.88 | 0.00 |
| <i>Gda</i>                | guanine deaminase                                                                                                        | 1435749 at   | 2.87 | 0.00 |
| <i>Rai14</i>              | retinoic acid induced 14                                                                                                 | 1417400 at   | 2.87 | 0.00 |
| <i>Slc11a1</i>            | solute carrier family 11 (proton-coupled divalent metal ion transporters), member 1                                      | 1420361 at   | 2.87 | 0.00 |
| <i>1190002H23Rik</i>      | RIKEN cDNA 1190002H23 gene                                                                                               | 1418003 at   | 2.87 | 0.01 |
| <i>Gprc3b</i>             | G protein-coupled receptor, family C, group 5, member B                                                                  | 1451411 at   | 2.87 | 0.00 |
| <i>Fcrlg</i>              | Fc receptor, IgE, high affinity I, gamma polypeptide                                                                     | 1418340 at   | 2.86 | 0.00 |
| <i>Flot2</i>              | Flotillin 2                                                                                                              | 1436666 at   | 2.86 | 0.00 |
| <i>Tspan4</i>             | tetraspanin 4                                                                                                            | 1448276 at   | 2.86 | 0.00 |
| <i>Oscn6</i>              | quiescin Q6                                                                                                              | 1420831 at   | 2.86 | 0.00 |
| <i>Il17ra</i>             | interleukin 17 receptor A                                                                                                | 1420905 at   | 2.86 | 0.00 |
| <i>1110003O08Rik</i>      | RIKEN cDNA 1110003O08 gene                                                                                               | 1428926 at   | 2.85 | 0.00 |
| <i>Ms4a8a</i>             | membrane-spanning 4-domains, subfamily A, member 8A                                                                      | 1418797 at   | 2.85 | 0.00 |
| <i>Comt</i>               | catechol-O-methyltransferase                                                                                             | 1449183 at   | 2.84 | 0.00 |
| <i>Stat3</i>              | signal transducer and activator of transcription 3                                                                       | 1460700 at   | 2.84 | 0.00 |
| <i>Adams9</i>             | a disintegrin-like and metallopeptidase (reprolysin type) with thrombospondin type 1 motif, 9                            | 1437785 at   | 2.83 | 0.01 |
| <i>Klf10</i>              | Kruppel-like factor 10                                                                                                   | 1416029 at   | 2.83 | 0.02 |
| <i>BC006779</i>           | cDNA sequence BC006779                                                                                                   | 1435454 a at | 2.82 | 0.00 |
| <i>Clic4</i>              | chloride intracellular channel 4 (mitochondrial)                                                                         | 1423393 at   | 2.82 | 0.01 |
| <i>1190002H23Rik</i>      | RIKEN cDNA 1190002H23 gene                                                                                               | 1438511 a at | 2.82 | 0.00 |
| <i>Ddx21</i>              | DEAD (Asp-Glu-Ala-Asp) box polypeptide 21                                                                                | 1448271 a at | 2.81 | 0.00 |
| <i>Rab20</i>              | RAB20, member RAS oncogene family                                                                                        | 1438097 at   | 2.81 | 0.00 |
| <i>Uap1 /// LOC640502</i> | UDP-N-acetylglucosamine pyrophosphorylase 1 /// similar to UDP-N-acetylhexosamine pyrophosphorylase                      | 1416743_at   | 2.81 | 0.00 |
| <i>Eif4ebp1</i>           | eukaryotic translation initiation factor 4E binding protein 1                                                            | 1434976 x at | 2.81 | 0.00 |
| <i>Ucp2</i>               | uncoupling protein 2 (mitochondrial, proton carrier)                                                                     | 1448188 at   | 2.80 | 0.00 |
| <i>AA536743</i>           | expressed sequence AA536743                                                                                              | 1427243 at   | 2.80 | 0.00 |
| ---                       | Adult male cecum cDNA, RIKEN full-length enriched library, clone:9130204C03 product:unclassifiable, full insert sequence | 1435265_at   | 2.80 | 0.00 |
| <i>Sema7a</i>             | sema domain, immunoglobulin domain (Ig), and GPI membrane anchor, (semaphorin) 7A                                        | 1459903 at   | 2.80 | 0.00 |
| <i>Susd2</i>              | sushi domain containing 2                                                                                                | 1426511 at   | 2.79 | 0.00 |
| <i>Gpr146</i>             | G protein-coupled receptor 146                                                                                           | 1451060 at   | 2.79 | 0.00 |
| <i>C330006D17Rik</i>      | RIKEN cDNA C330006D17 gene                                                                                               | 1430752 at   | 2.79 | 0.00 |
| <i>Arid5a</i>             | AT rich interactive domain 5A (Mrf1 like)                                                                                | 1451340 at   | 2.79 | 0.00 |
| <i>Eif2ak2</i>            | eukaryotic translation initiation factor 2-alpha kinase 2                                                                | 1422006 at   | 2.79 | 0.00 |
| <i>Tacc2</i>              | transforming, acidic coiled-coil containing protein 2                                                                    | 1425745 a at | 2.78 | 0.00 |
| <i>Uap1 /// LOC640502</i> | UDP-N-acetylglucosamine pyrophosphorylase 1 /// similar to UDP-N-acetylhexosamine pyrophosphorylase                      | 1437490_x_at | 2.78 | 0.00 |
| <i>Bzrp</i>               | benzodiazepine receptor, peripheral                                                                                      | 1438948 x at | 2.78 | 0.00 |
| <i>Mar-05</i>             | membrane-associated ring finger (C3HC4) 5                                                                                | 1452925 at   | 2.78 | 0.00 |
| <i>AA536743</i>           | expressed sequence AA536743                                                                                              | 1452359 at   | 2.77 | 0.00 |
| <i>Ripk3</i>              | receptor-interacting serine-threonine kinase 3                                                                           | 1448449 at   | 2.77 | 0.00 |
| <i>Slc44a2</i>            | solute carrier family 44, member 2                                                                                       | 1438559 x at | 2.77 | 0.00 |
| <i>Acvr1b</i>             | activin A receptor, type 1B                                                                                              | 1433725 at   | 2.77 | 0.00 |
| <i>Litaf</i>              | LPS-induced TN factor                                                                                                    | 1416304 at   | 2.76 | 0.00 |
| <i>Pbef1</i>              | pre-B-cell colony-enhancing factor 1                                                                                     | 1417190 at   | 2.76 | 0.00 |
| <i>Msn</i>                | moesin                                                                                                                   | 1450379 at   | 2.76 | 0.01 |
| <i>Trim34</i>             | Tripartite motif protein 34                                                                                              | 1443858 at   | 2.76 | 0.00 |
| <i>Pik3ap1</i>            | phosphoinositide-3-kinase adaptor protein 1                                                                              | 1429831 at   | 2.76 | 0.01 |
| <i>1110038F14Rik</i>      | RIKEN cDNA 1110038F14 gene                                                                                               | 1416885 at   | 2.76 | 0.00 |
| ---                       | ---                                                                                                                      | 1431166 at   | 2.75 | 0.00 |
| <i>Zwint</i>              | ZW10 interactor                                                                                                          | 1429786 a at | 2.75 | 0.00 |
| <i>Errf1</i>              | ERBB receptor feedback inhibitor 1                                                                                       | 1416129 at   | 2.75 | 0.00 |
| <i>BC023818</i>           | cDNA sequence BC023818                                                                                                   | 1439855 at   | 2.75 | 0.00 |
| <i>1110018G07Rik</i>      | RIKEN cDNA 1110018G07 gene                                                                                               | 1454721 at   | 2.75 | 0.00 |
| <i>Zc3h12a</i>            | zinc finger CCCH type containing 12A                                                                                     | 1427348 at   | 2.73 | 0.00 |
| <i>Rac2</i>               | RAS-related C3 botulinum substrate 2                                                                                     | 1417620 at   | 2.73 | 0.00 |
| <i>Pou3f1</i>             | POU domain, class 3, transcription factor 1                                                                              | 1460038 at   | 2.73 | 0.00 |
| <i>Ucp2</i>               | uncoupling protein 2 (mitochondrial, proton carrier)                                                                     | 1459741 x at | 2.73 | 0.00 |
| <i>1500012F01Rik</i>      | RIKEN cDNA 1500012F01 gene                                                                                               | 1455010 at   | 2.72 | 0.00 |
| <i>Slc44a2</i>            | solute carrier family 44, member 2                                                                                       | 1428065 at   | 2.72 | 0.00 |
| <i>Bst1</i>               | bone marrow stromal cell antigen 1                                                                                       | 1449454 at   | 2.72 | 0.01 |
| <i>Sdc4</i>               | syndecan 4                                                                                                               | 1417654 at   | 2.71 | 0.00 |
| <i>Apold1</i>             | apolipoprotein L domain containing 1                                                                                     | 1441228 at   | 2.70 | 0.02 |
| <i>Dnajb4</i>             | DnaJ (Hsp40) homolog, subfamily B, member 4                                                                              | 1431734 a at | 2.70 | 0.00 |
| <i>Cd47</i>               | CD47 antigen (Rh-related antigen, integrin-associated signal transducer)                                                 | 1449507 a at | 2.70 | 0.00 |
| <i>Gadd45b</i>            | growth arrest and DNA-damage-inducible 45 beta                                                                           | 1449773 s at | 2.70 | 0.00 |
| <i>Pvr</i>                | poliovirus receptor                                                                                                      | 1451160 s at | 2.70 | 0.00 |
| <i>Tnfrsf1a</i>           | tumor necrosis factor receptor superfamily, member 1a                                                                    | 1417291 at   | 2.69 | 0.00 |
| <i>BC055107</i>           | cDNA sequence BC055107                                                                                                   | 1434202 a at | 2.69 | 0.01 |
| <i>Trp53inp1</i>          | transformation related protein 53 inducible nuclear protein 1                                                            | 1416926 at   | 2.69 | 0.02 |
| <i>Rhoc</i>               | ras homolog gene family, member C                                                                                        | 1448605 at   | 2.69 | 0.00 |
| <i>Tcf23</i>              | transcription factor 23                                                                                                  | 1421078 at   | 2.68 | 0.00 |
| ---                       | Transcribed locus                                                                                                        | 1443852 at   | 2.68 | 0.00 |
| <i>Tbk1</i>               | TANK-binding kinase 1                                                                                                    | 1460315 s at | 2.67 | 0.00 |
| <i>Jak2</i>               | Janus kinase 2                                                                                                           | 1421065 at   | 2.67 | 0.00 |
| <i>Acot9 /// Acot10</i>   | acyl-CoA thioesterase 9 /// acyl-CoA thioesterase 10                                                                     | 1449968 s at | 2.67 | 0.00 |
| <i>Il2rg</i>              | interleukin 2 receptor, gamma chain                                                                                      | 1416296 at   | 2.67 | 0.00 |
| <i>Hist1h1c</i>           | histone H1, H1c                                                                                                          | 1416101 a at | 2.67 | 0.00 |
| <i>Eif4ebp1</i>           | eukaryotic translation initiation factor 4E binding protein 1                                                            | 1417562 at   | 2.66 | 0.00 |
| <i>Tfdp2</i>              | transcription factor Dp 2                                                                                                | 1443962 at   | 2.66 | 0.00 |
| <i>Trim25</i>             | tripartite motif protein 25                                                                                              | 1425974 a at | 2.66 | 0.00 |

|                                                                                                                       |                                                                                                                                                                                                                                                                                                                                                                                                              |              |      |      |
|-----------------------------------------------------------------------------------------------------------------------|--------------------------------------------------------------------------------------------------------------------------------------------------------------------------------------------------------------------------------------------------------------------------------------------------------------------------------------------------------------------------------------------------------------|--------------|------|------|
| <i>Slc44a2</i>                                                                                                        | solute carrier family 44, member 2                                                                                                                                                                                                                                                                                                                                                                           | 1438860 a at | 2.66 | 0.00 |
| <i>Nfkbiz</i>                                                                                                         | Nuclear factor of kappa light polypeptide gene enhancer in B-cells inhibitor, zeta                                                                                                                                                                                                                                                                                                                           | 1457404 at   | 2.65 | 0.00 |
| <i>111006017Rik</i>                                                                                                   | RIKEN cDNA 111006017 gene                                                                                                                                                                                                                                                                                                                                                                                    | 1437451 at   | 2.65 | 0.00 |
| <i>4930573O21Rik</i>                                                                                                  | RIKEN cDNA 4930573O21 gene                                                                                                                                                                                                                                                                                                                                                                                   | 1432590 at   | 2.65 | 0.02 |
| <i>Fosl2 // LOC634417</i>                                                                                             | fos-like antigen 2 // similar to fos-like antigen 2                                                                                                                                                                                                                                                                                                                                                          | 1437247 at   | 2.64 | 0.01 |
| <i>Ifitm2</i>                                                                                                         | interferon induced transmembrane protein 2                                                                                                                                                                                                                                                                                                                                                                   | 1417460 at   | 2.64 | 0.00 |
| <i>Ptpn2</i>                                                                                                          | protein tyrosine phosphatase, non-receptor type 2                                                                                                                                                                                                                                                                                                                                                            | 1417140 a at | 2.64 | 0.00 |
| <i>Zfp52</i>                                                                                                          | zinc finger protein 52                                                                                                                                                                                                                                                                                                                                                                                       | 1426471 at   | 2.64 | 0.00 |
| <i>8430408G22Rik</i>                                                                                                  | RIKEN cDNA 8430408G22 gene                                                                                                                                                                                                                                                                                                                                                                                   | 1433837 at   | 2.64 | 0.00 |
| <i>2810026P18Rik</i>                                                                                                  | RIKEN cDNA 2810026P18 gene                                                                                                                                                                                                                                                                                                                                                                                   | 1428529 at   | 2.64 | 0.00 |
| <i>Dph5</i>                                                                                                           | DPH5 homolog (S. cerevisiae)                                                                                                                                                                                                                                                                                                                                                                                 | 1452839 at   | 2.63 | 0.00 |
| <i>Ncf4</i>                                                                                                           | neutrophil cytosolic factor 4                                                                                                                                                                                                                                                                                                                                                                                | 1418465 at   | 2.63 | 0.00 |
| <i>Lpxn</i>                                                                                                           | leupaxin                                                                                                                                                                                                                                                                                                                                                                                                     | 1424965 at   | 2.63 | 0.00 |
| <i>Fads3</i>                                                                                                          | fatty acid desaturase 3                                                                                                                                                                                                                                                                                                                                                                                      | 1449219 at   | 2.63 | 0.00 |
| <i>Kcne4</i>                                                                                                          | potassium voltage-gated channel, Isk-related subfamily, gene 4                                                                                                                                                                                                                                                                                                                                               | 1418156 at   | 2.63 | 0.00 |
| <i>Scotin</i>                                                                                                         | scotin gene                                                                                                                                                                                                                                                                                                                                                                                                  | 1437503 a at | 2.63 | 0.00 |
| <i>Nudt6</i>                                                                                                          | nudix (nucleoside diphosphate linked moiety X)-type motif 6                                                                                                                                                                                                                                                                                                                                                  | 1456945 at   | 2.63 | 0.00 |
| <i>Reg3a</i>                                                                                                          | regenerating islet-derived 3 alpha                                                                                                                                                                                                                                                                                                                                                                           | 1449495 at   | 2.63 | 0.00 |
| <i>Ptp4a1 // LOC269859 // LOC433406 // LOC546482 // LOC627166 // LOC627200 // LOC667723 // LOC669215 // LOC673579</i> | protein tyrosine phosphatase 4a1 // similar to protein tyrosine phosphatase 4a1 // protein tyrosine phosphatase 4a1-like // similar to protein tyrosine phosphatase 4a1 // protein tyrosine phosphatase 4a1 pseudogene // protein tyrosine phosphatase 4a1-like // similar to protein tyrosine phosphatase 4a1 // similar to protein tyrosine phosphatase 4a1 // similar to protein tyrosine phosphatase 4a1 | 1449322_at   | 2.62 | 0.00 |
| <i>Samd9l</i>                                                                                                         | sterile alpha motif domain containing 9-like                                                                                                                                                                                                                                                                                                                                                                 | 1460603 at   | 2.62 | 0.00 |
| <i>Pla2g7</i>                                                                                                         | phospholipase A2, group VII (platelet-activating factor acetylhydrolase, plasma)                                                                                                                                                                                                                                                                                                                             | 1430700 a at | 2.62 | 0.00 |
| <i>Phyhd1 // Lrrc8a</i>                                                                                               | phytanoyl-CoA dioxygenase domain containing 1 // leucine rich repeat containing 8A                                                                                                                                                                                                                                                                                                                           | 1428394 at   | 2.61 | 0.00 |
| <i>Btg2</i>                                                                                                           | B-cell translocation gene 2, anti-proliferative                                                                                                                                                                                                                                                                                                                                                              | 1448272 at   | 2.61 | 0.02 |
| <i>5330406M23Rik</i>                                                                                                  | RIKEN cDNA 5330406M23 gene                                                                                                                                                                                                                                                                                                                                                                                   | 1429900 at   | 2.60 | 0.00 |
| <i>0610011104Rik</i>                                                                                                  | RIKEN cDNA 0610011104 gene                                                                                                                                                                                                                                                                                                                                                                                   | 1423909 at   | 2.60 | 0.01 |
| <i>Rlf</i>                                                                                                            | rearranged L-myc fusion sequence                                                                                                                                                                                                                                                                                                                                                                             | 1427171 at   | 2.60 | 0.00 |
| <i>Car13</i>                                                                                                          | carbonic anhydrase 13                                                                                                                                                                                                                                                                                                                                                                                        | 1421307 at   | 2.60 | 0.00 |
| <i>1110038B12Rik</i>                                                                                                  | RIKEN cDNA 1110038B12 gene                                                                                                                                                                                                                                                                                                                                                                                   | 1441081 a at | 2.60 | 0.00 |
| <i>Zfp445</i>                                                                                                         | zinc finger protein 445                                                                                                                                                                                                                                                                                                                                                                                      | 1427255 s at | 2.60 | 0.00 |
| <i>Tgoln1 // Tgoln2</i>                                                                                               | trans-golgi network protein // trans-golgi network protein 2                                                                                                                                                                                                                                                                                                                                                 | 1423307 s at | 2.60 | 0.00 |
| <i>Mthfd2</i>                                                                                                         | methylenetetrahydrofolate dehydrogenase (NAD+ dependent), methylenetetrahydrofolate cyclohydrolase                                                                                                                                                                                                                                                                                                           | 1419254_at   | 2.59 | 0.00 |
| <i>Lilrb3 // LOC619608</i>                                                                                            | leukocyte immunoglobulin-like receptor, subfamily B (with TM and ITIM domains), member 3 // hypothetical LOC619608                                                                                                                                                                                                                                                                                           | 1424302_at   | 2.59 | 0.00 |
| <i>Vcam1</i>                                                                                                          | vascular cell adhesion molecule 1                                                                                                                                                                                                                                                                                                                                                                            | 1448162 at   | 2.59 | 0.00 |
| <i>Trim25</i>                                                                                                         | tripartite motif protein 25                                                                                                                                                                                                                                                                                                                                                                                  | 1419879 s at | 2.59 | 0.00 |
| <i>Gpr146</i>                                                                                                         | G protein-coupled receptor 146                                                                                                                                                                                                                                                                                                                                                                               | 1423632 at   | 2.59 | 0.00 |
| <i>Masp1</i>                                                                                                          | mannan-binding lectin serine peptidase 1                                                                                                                                                                                                                                                                                                                                                                     | 1455346 at   | 2.58 | 0.00 |
| <i>AU021128</i>                                                                                                       | expressed sequence AU021128                                                                                                                                                                                                                                                                                                                                                                                  | 1457575 at   | 2.58 | 0.02 |
| <i>T2bp</i>                                                                                                           | Traf2 binding protein                                                                                                                                                                                                                                                                                                                                                                                        | 1426501 a at | 2.57 | 0.00 |
| <i>Zwint</i>                                                                                                          | ZW10 interactor                                                                                                                                                                                                                                                                                                                                                                                              | 1427539 a at | 2.57 | 0.00 |
| <i>Rbm18</i>                                                                                                          | RNA binding motif protein 18                                                                                                                                                                                                                                                                                                                                                                                 | 1420607 at   | 2.57 | 0.01 |
| <i>Tbl1xr1</i>                                                                                                        | transducin (beta)-like 1X-linked receptor 1                                                                                                                                                                                                                                                                                                                                                                  | 1450739 at   | 2.57 | 0.00 |
| <i>Asns</i>                                                                                                           | asparagine synthetase                                                                                                                                                                                                                                                                                                                                                                                        | 1451095 at   | 2.56 | 0.00 |
| <i>Abi2</i>                                                                                                           | Abl-interactor 2                                                                                                                                                                                                                                                                                                                                                                                             | 1444783 at   | 2.56 | 0.02 |
| <i>Arg1</i>                                                                                                           | arginase 1, liver                                                                                                                                                                                                                                                                                                                                                                                            | 1419549 at   | 2.56 | 0.01 |
| <i>Trdn</i>                                                                                                           | triadin                                                                                                                                                                                                                                                                                                                                                                                                      | 1426143 at   | 2.56 | 0.00 |
| <i>Tor3a</i>                                                                                                          | torsin family 3, member A                                                                                                                                                                                                                                                                                                                                                                                    | 1421998 at   | 2.56 | 0.00 |
| <i>Csf1</i>                                                                                                           | colony stimulating factor 1 (macrophage)                                                                                                                                                                                                                                                                                                                                                                     | 1448914 a at | 2.56 | 0.00 |
| <i>Nek6 // LOC674247</i>                                                                                              | NIMA (never in mitosis gene a)-related expressed kinase 6 // similar to NIMA (never in mitosis gene a)-related expressed kinase 6                                                                                                                                                                                                                                                                            | 1423596_at   | 2.56 | 0.00 |
| <i>Lgals8</i>                                                                                                         | lectin, galactose binding, soluble 8                                                                                                                                                                                                                                                                                                                                                                         | 1422661 at   | 2.56 | 0.00 |
| <i>5330421F07Rik</i>                                                                                                  | RIKEN cDNA 5330421F07 gene                                                                                                                                                                                                                                                                                                                                                                                   | 1443230 at   | 2.55 | 0.03 |
| <i>Spltc2</i>                                                                                                         | serine palmitoyltransferase, long chain base subunit 2                                                                                                                                                                                                                                                                                                                                                       | 1460243 at   | 2.55 | 0.00 |
| <i>Acot9</i>                                                                                                          | acyl-CoA thioesterase 9                                                                                                                                                                                                                                                                                                                                                                                      | 1418073 at   | 2.54 | 0.00 |
| <i>Tmem71</i>                                                                                                         | transmembrane protein 71                                                                                                                                                                                                                                                                                                                                                                                     | 1436212 at   | 2.54 | 0.00 |
| <i>BC023892</i>                                                                                                       | cDNA sequence BC023892                                                                                                                                                                                                                                                                                                                                                                                       | 1437868 at   | 2.54 | 0.00 |
| <i>Adam9</i>                                                                                                          | a disintegrin and metallopeptidase domain 9 (meltrin gamma)                                                                                                                                                                                                                                                                                                                                                  | 1416094 at   | 2.53 | 0.00 |
| <i>2900092N22Rik</i>                                                                                                  | RIKEN cDNA 2900092N22 gene                                                                                                                                                                                                                                                                                                                                                                                   | 1454472 at   | 2.53 | 0.07 |
| <i>Tbc1d15</i>                                                                                                        | TBC1 domain family, member 15                                                                                                                                                                                                                                                                                                                                                                                | 1416061 at   | 2.53 | 0.00 |
| <i>1110061O04Rik</i>                                                                                                  | RIKEN cDNA 1110061O04 gene                                                                                                                                                                                                                                                                                                                                                                                   | 1425066 a at | 2.53 | 0.00 |
| <i>Bzrp</i>                                                                                                           | benzodiazepine receptor, peripheral                                                                                                                                                                                                                                                                                                                                                                          | 1416695 at   | 2.53 | 0.00 |
| <i>Fbxo32</i>                                                                                                         | F-box only protein 32                                                                                                                                                                                                                                                                                                                                                                                        | 1448747 at   | 2.53 | 0.00 |
| <i>Zwint</i>                                                                                                          | ZW10 interactor                                                                                                                                                                                                                                                                                                                                                                                              | 1429787 x at | 2.53 | 0.00 |
| <i>Mid1ip1</i>                                                                                                        | Mid1 interacting protein 1 (gastrulation specific G12-like (zebrafish))                                                                                                                                                                                                                                                                                                                                      | 1416840 at   | 2.52 | 0.00 |
| <i>Rrbp1</i>                                                                                                          | ribosome binding protein 1                                                                                                                                                                                                                                                                                                                                                                                   | 1449221 a at | 2.52 | 0.00 |
| <i>Daxx</i>                                                                                                           | Fas death domain-associated protein                                                                                                                                                                                                                                                                                                                                                                          | 1419026 at   | 2.52 | 0.00 |
| <i>Scotin</i>                                                                                                         | scotin gene                                                                                                                                                                                                                                                                                                                                                                                                  | 1423986 a at | 2.52 | 0.00 |
| <i>Edem1</i>                                                                                                          | ER degradation enhancer, mannosidase alpha-like 1                                                                                                                                                                                                                                                                                                                                                            | 1424065 at   | 2.52 | 0.00 |
| <i>Gda</i>                                                                                                            | guanine deaminase                                                                                                                                                                                                                                                                                                                                                                                            | 1435748 at   | 2.52 | 0.00 |
| <i>Mx1</i>                                                                                                            | myxovirus (influenza virus) resistance 1                                                                                                                                                                                                                                                                                                                                                                     | 1451905 a at | 2.52 | 0.00 |
| <i>Cblb</i>                                                                                                           | Casitas B-lineage lymphoma b                                                                                                                                                                                                                                                                                                                                                                                 | 1437304 at   | 2.51 | 0.00 |
| <i>Olr1</i>                                                                                                           | oxidized low density lipoprotein (lectin-like) receptor 1                                                                                                                                                                                                                                                                                                                                                    | 1419534 at   | 2.51 | 0.00 |
| <i>Fbxo32</i>                                                                                                         | F-box only protein 32                                                                                                                                                                                                                                                                                                                                                                                        | 1417522 at   | 2.51 | 0.00 |
| <i>Rhoc</i>                                                                                                           | ras homolog gene family, member C                                                                                                                                                                                                                                                                                                                                                                            | 1435394 s at | 2.51 | 0.00 |
| <i>Adar</i>                                                                                                           | Adenosine deaminase, RNA-specific                                                                                                                                                                                                                                                                                                                                                                            | 1439276 at   | 2.51 | 0.00 |
| <i>Art5</i>                                                                                                           | ADP-ribosyltransferase 5                                                                                                                                                                                                                                                                                                                                                                                     | 1427759 a at | 2.51 | 0.00 |
| <i>Irak1bp1</i>                                                                                                       | interleukin-1 receptor-associated kinase 1 binding protein 1                                                                                                                                                                                                                                                                                                                                                 | 1431771 at   | 2.50 | 0.00 |
| <i>BB114266</i>                                                                                                       | Expressed sequence BB114266                                                                                                                                                                                                                                                                                                                                                                                  | 1437694 at   | 2.50 | 0.00 |
| <i>AI481105</i>                                                                                                       | expressed sequence AI481105                                                                                                                                                                                                                                                                                                                                                                                  | 1427091 at   | 2.49 | 0.00 |
| <i>Serinc3</i>                                                                                                        | serine incorporator 3                                                                                                                                                                                                                                                                                                                                                                                        | 1456080 a at | 2.49 | 0.00 |
| <i>Slc2a1</i>                                                                                                         | solute carrier family 2 (facilitated glucose transporter), member 1                                                                                                                                                                                                                                                                                                                                          | 1426599 a at | 2.49 | 0.00 |
| <i>Rfx5</i>                                                                                                           | regulatory factor X, 5 (influences HLA class II expression)                                                                                                                                                                                                                                                                                                                                                  | 1423103 at   | 2.49 | 0.00 |
| <i>Spon1</i>                                                                                                          | spondin 1, (I-spondin) extracellular matrix protein                                                                                                                                                                                                                                                                                                                                                          | 1451342 at   | 2.49 | 0.00 |
| <i>Stat3</i>                                                                                                          | signal transducer and activator of transcription 3                                                                                                                                                                                                                                                                                                                                                           | 1426587 a at | 2.49 | 0.00 |
| <i>Slnf9</i>                                                                                                          | schlafen 9                                                                                                                                                                                                                                                                                                                                                                                                   | 1436472 at   | 2.49 | 0.00 |
| <i>C330012H03Rik</i>                                                                                                  | RIKEN cDNA C330012H03 gene                                                                                                                                                                                                                                                                                                                                                                                   | 1437103 at   | 2.48 | 0.00 |
| <i>Pml</i>                                                                                                            | promyelocytic leukemia                                                                                                                                                                                                                                                                                                                                                                                       | 1448757 at   | 2.48 | 0.00 |
| <i>Saa2</i>                                                                                                           | serum amyloid A 2                                                                                                                                                                                                                                                                                                                                                                                            | 1449326 x at | 2.48 | 0.00 |
| <i>Hist1h1c</i>                                                                                                       | histone 1, H1c                                                                                                                                                                                                                                                                                                                                                                                               | 1436994 a at | 2.48 | 0.00 |
| <i>Mtus1</i>                                                                                                          | mitochondrial tumor suppressor 1                                                                                                                                                                                                                                                                                                                                                                             | 1436501 at   | 2.48 | 0.00 |
| <i>Lv6e</i>                                                                                                           | lymphocyte antigen 6 complex, locus E                                                                                                                                                                                                                                                                                                                                                                        | 1453304 s at | 2.48 | 0.00 |

|                                                       |                                                                                                                                                                                                                                                        |              |      |      |
|-------------------------------------------------------|--------------------------------------------------------------------------------------------------------------------------------------------------------------------------------------------------------------------------------------------------------|--------------|------|------|
| <i>Sema3f</i>                                         | sema domain, immunoglobulin domain (Ig), short basic domain, secreted, (semaphorin) 3 F                                                                                                                                                                | 1420508_at   | 2.48 | 0.00 |
| <i>Tnfaip3</i>                                        | tumor necrosis factor, alpha-induced protein 3                                                                                                                                                                                                         | 1450829_at   | 2.47 | 0.00 |
| <i>Pnpla2</i>                                         | patatin-like phospholipase domain containing 2                                                                                                                                                                                                         | 1428143_a_at | 2.47 | 0.00 |
| <i>Lv6e</i>                                           | lymphocyte antigen 6 complex, locus E                                                                                                                                                                                                                  | 1439773_at   | 2.47 | 0.00 |
| <i>Rai14</i>                                          | retinoic acid induced 14                                                                                                                                                                                                                               | 1441030_at   | 2.47 | 0.01 |
| <i>Hsd11b1</i>                                        | hydroxysteroid 11-beta dehydrogenase 1                                                                                                                                                                                                                 | 1449038_at   | 2.46 | 0.00 |
| <i>C730024G19Rik</i>                                  | RIKEN cDNA C730024G19 gene                                                                                                                                                                                                                             | 1454766_at   | 2.46 | 0.00 |
| <i>P2rv2</i>                                          | purinergic receptor P2Y, G-protein coupled 2                                                                                                                                                                                                           | 1450318_a_at | 2.46 | 0.00 |
| <i>Vcam1</i>                                          | vascular cell adhesion molecule 1                                                                                                                                                                                                                      | 1451314_a_at | 2.46 | 0.00 |
| <i>Apod</i>                                           | Apolipoprotein D                                                                                                                                                                                                                                       | 1444749_at   | 2.46 | 0.00 |
| <i>C2</i>                                             | complement component 2 (within H-2S)                                                                                                                                                                                                                   | 1416051_at   | 2.46 | 0.00 |
| <i>Gpr146</i>                                         | G protein-coupled receptor 146                                                                                                                                                                                                                         | 1454685_at   | 2.46 | 0.00 |
| <i>1810009K13Rik</i>                                  | RIKEN cDNA 1810009K13 gene                                                                                                                                                                                                                             | 1423358_at   | 2.45 | 0.00 |
| <i>Fmn12</i>                                          | Formin-like 2                                                                                                                                                                                                                                          | 1440111_at   | 2.44 | 0.00 |
| <i>B4gal5</i>                                         | UDP-Gal:betaGlcNAc beta 1,4-galactosyltransferase, polypeptide 5                                                                                                                                                                                       | 1433617_s_at | 2.44 | 0.00 |
| <i>Ddit4</i>                                          | DNA-damage-inducible transcript 4                                                                                                                                                                                                                      | 1428306_at   | 2.44 | 0.00 |
| <i>Rtn4r12</i>                                        | reticulon 4 receptor-like 2                                                                                                                                                                                                                            | 1439573_at   | 2.44 | 0.00 |
| <i>2200002D01Rik</i>                                  | RIKEN cDNA 2200002D01 gene                                                                                                                                                                                                                             | 1428671_at   | 2.44 | 0.00 |
| <i>Tbgl</i>                                           | transforming growth factor beta regulated gene 1                                                                                                                                                                                                       | 1452648_at   | 2.44 | 0.00 |
| <i>Tnfp1</i>                                          | TNFAIP3 interacting protein 1                                                                                                                                                                                                                          | 1427689_a_at | 2.44 | 0.00 |
| <i>Gclm</i>                                           | glutamate-cysteine ligase, modifier subunit                                                                                                                                                                                                            | 1418627_at   | 2.43 | 0.00 |
| <i>Il13ra1</i>                                        | interleukin 13 receptor, alpha 1                                                                                                                                                                                                                       | 1427164_at   | 2.43 | 0.01 |
| <i>Txnip</i>                                          | thioredoxin interacting protein                                                                                                                                                                                                                        | 1415996_at   | 2.43 | 0.01 |
| <i>Comt</i>                                           | catechol-O-methyltransferase                                                                                                                                                                                                                           | 1418701_at   | 2.43 | 0.00 |
| <i>H2-M3</i>                                          | histocompatibility 2, M region locus 3                                                                                                                                                                                                                 | 1421358_at   | 2.43 | 0.00 |
| <i>Cyb561</i>                                         | Cytochrome b-561                                                                                                                                                                                                                                       | 1458496_at   | 2.43 | 0.00 |
| <i>Csf1</i>                                           | colony stimulating factor 1 (macrophage)                                                                                                                                                                                                               | 1460220_a_at | 2.42 | 0.00 |
| <i>Sema5a</i>                                         | sema domain, seven thrombospondin repeats (type 1 and type 1-like), transmembrane domain (TM) and short cytoplasmic domain, (semaphorin) 5A                                                                                                            | 1422167_at   | 2.42 | 0.00 |
| <i>Errf1</i>                                          | ERBB receptor feedback inhibitor 1                                                                                                                                                                                                                     | 1419816_s_at | 2.42 | 0.01 |
| <i>Rnf31</i>                                          | ring finger protein 31                                                                                                                                                                                                                                 | 1455051_at   | 2.42 | 0.00 |
| <i>Grhl1</i>                                          | grainyhead-like 1 (Drosophila)                                                                                                                                                                                                                         | 1424030_at   | 2.42 | 0.00 |
| <i>Gosr1</i>                                          | golgi SNAP receptor complex member 1                                                                                                                                                                                                                   | 1448256_at   | 2.42 | 0.01 |
| <i>Procr</i>                                          | protein C receptor, endothelial                                                                                                                                                                                                                        | 1420664_s_at | 2.42 | 0.00 |
| <i>Slc39a6</i>                                        | solute carrier family 39 (metal ion transporter), member 6                                                                                                                                                                                             | 1424674_at   | 2.42 | 0.00 |
| ---                                                   | ---                                                                                                                                                                                                                                                    | 1439537_at   | 2.42 | 0.00 |
| <i>Rtn4</i>                                           | reticulon 4                                                                                                                                                                                                                                            | 1437224_at   | 2.42 | 0.00 |
| <i>AW112010</i>                                       | expressed sequence AW112010                                                                                                                                                                                                                            | 1434372_at   | 2.42 | 0.00 |
| <i>Apod</i>                                           | apolipoprotein D                                                                                                                                                                                                                                       | 1416371_at   | 2.41 | 0.00 |
| ---                                                   | Transcribed locus                                                                                                                                                                                                                                      | 1442338_at   | 2.41 | 0.00 |
| <i>Noc4l</i>                                          | nucleolar complex associated 4 homolog (S. cerevisiae)                                                                                                                                                                                                 | 1443794_x_at | 2.41 | 0.00 |
| <i>Adck4</i>                                          | aarF domain containing kinase 4                                                                                                                                                                                                                        | 1448490_at   | 2.41 | 0.00 |
| <i>Gsdmcd1</i>                                        | gasdermin domain containing 1                                                                                                                                                                                                                          | 1428767_at   | 2.41 | 0.00 |
| <i>1810009M01Rik</i>                                  | RIKEN cDNA 1810009M01 gene                                                                                                                                                                                                                             | 1418004_a_at | 2.40 | 0.00 |
| <i>Egfr</i>                                           | epidermal growth factor receptor                                                                                                                                                                                                                       | 1424932_at   | 2.40 | 0.00 |
| <i>Dbn1</i>                                           | drebrin 1                                                                                                                                                                                                                                              | 1426024_a_at | 2.40 | 0.00 |
| <i>Bcl2l1</i>                                         | Bcl2-like 1                                                                                                                                                                                                                                            | 1420888_at   | 2.39 | 0.00 |
| <i>2310008H04Rik</i>                                  | RIKEN cDNA 2310008H04 gene                                                                                                                                                                                                                             | 1451171_at   | 2.39 | 0.00 |
| <i>Sfi1</i> /// LOC673404 /// LOC673420 /// LOC673566 | Sfi1 homolog, spindle assembly associated (yeast) /// similar to spindle assembly associated Sfi1 homolog isoform b /// similar to spindle assembly associated Sfi1 homolog isoform b /// similar to Sfi1 homolog, spindle assembly associated (yeast) | 1426787_at   | 2.39 | 0.00 |
| <i>Pde4b</i>                                          | Phosphodiesterase 4B, cAMP specific                                                                                                                                                                                                                    | 1445449_at   | 2.39 | 0.02 |
| <i>Gm489</i>                                          | gene model 489, (NCBI)                                                                                                                                                                                                                                 | 1457707_at   | 2.39 | 0.00 |
| <i>Bid</i>                                            | BH3 interacting domain death agonist                                                                                                                                                                                                                   | 1417045_at   | 2.39 | 0.00 |
| <i>Tor1aip1</i>                                       | torsin A interacting protein 1                                                                                                                                                                                                                         | 1426084_a_at | 2.38 | 0.00 |
| <i>Dnajb4</i>                                         | DnaJ (Hsp40) homolog, subfamily B, member 4                                                                                                                                                                                                            | 1443611_at   | 2.38 | 0.00 |
| <i>H3f3b</i>                                          | H3 histone, family 3B                                                                                                                                                                                                                                  | 1430357_at   | 2.38 | 0.00 |
| <i>BC032204</i>                                       | cDNA sequence BC032204                                                                                                                                                                                                                                 | 1456014_s_at | 2.37 | 0.00 |
| <i>Thbs4</i>                                          | thrombospondin 4                                                                                                                                                                                                                                       | 1449388_at   | 2.37 | 0.02 |
| <i>Clec2d</i>                                         | C-type lectin domain family 2, member d                                                                                                                                                                                                                | 1419477_at   | 2.36 | 0.00 |
| <i>Gprk5</i>                                          | G protein-coupled receptor kinase 5                                                                                                                                                                                                                    | 1449514_at   | 2.36 | 0.00 |
| <i>C2</i>                                             | complement component 2 (within H-2S)                                                                                                                                                                                                                   | 1441912_x_at | 2.36 | 0.00 |
| <i>2810416G20Rik</i>                                  | RIKEN cDNA 2810416G20 gene                                                                                                                                                                                                                             | 1431220_at   | 2.36 | 0.00 |
| <i>Rras2</i>                                          | related RAS viral (r-ras) oncogene homolog 2                                                                                                                                                                                                           | 1417398_at   | 2.36 | 0.03 |
| <i>Pnp</i>                                            | purine-nucleoside phosphorylase                                                                                                                                                                                                                        | 1416530_a_at | 2.36 | 0.00 |
| <i>Ccr1</i>                                           | chemokine (C-C motif) receptor 1                                                                                                                                                                                                                       | 1419609_at   | 2.35 | 0.00 |
| <i>Parp3</i>                                          | poly (ADP-ribose) polymerase family, member 3                                                                                                                                                                                                          | 1451969_s_at | 2.35 | 0.00 |
| <i>Birc2</i>                                          | baculoviral IAP repeat-containing 2                                                                                                                                                                                                                    | 1418854_at   | 2.35 | 0.00 |
| <i>4933426M11Rik</i>                                  | RIKEN cDNA 4933426M11 gene                                                                                                                                                                                                                             | 1456808_at   | 2.34 | 0.00 |
| <i>Steap1</i>                                         | six transmembrane epithelial antigen of the prostate 1                                                                                                                                                                                                 | 1451532_s_at | 2.34 | 0.00 |
| <i>Khk</i>                                            | ketoheokinase                                                                                                                                                                                                                                          | 1449062_at   | 2.34 | 0.00 |
| <i>Fcgr2b</i>                                         | Fc receptor, IgG, low affinity IIb                                                                                                                                                                                                                     | 1455332_x_at | 2.34 | 0.00 |
| <i>Zfp445</i>                                         | zinc finger protein 445                                                                                                                                                                                                                                | 1454774_at   | 2.34 | 0.00 |
| <i>LOC671237</i>                                      | similar to Putative RNA-binding protein 3 (RNA-binding motif protein 3)                                                                                                                                                                                | 1422660_at   | 2.34 | 0.00 |
| <i>LincR</i>                                          | lung-inducible neuralized-related C3HC4 RING domain protein                                                                                                                                                                                            | 1444003_at   | 2.33 | 0.01 |
| <i>Slc2a1</i>                                         | solute carrier family 2 (facilitated glucose transporter), member 1                                                                                                                                                                                    | 1434773_a_at | 2.33 | 0.00 |
| <i>Serpina1a</i>                                      | serine (or cysteine) peptidase inhibitor, clade B, member 1a                                                                                                                                                                                           | 1416318_at   | 2.33 | 0.00 |
| <i>8430408G22Rik</i>                                  | RIKEN cDNA 8430408G22 gene                                                                                                                                                                                                                             | 1433836_a_at | 2.33 | 0.00 |
| <i>Mar-05</i>                                         | membrane-associated ring finger (C3HC4) 5                                                                                                                                                                                                              | 1428843_at   | 2.33 | 0.00 |
| <i>Gda</i>                                            | guanine deaminase                                                                                                                                                                                                                                      | 1422868_s_at | 2.32 | 0.00 |
| <i>Il17ra</i>                                         | interleukin 17 receptor A                                                                                                                                                                                                                              | 1420904_at   | 2.32 | 0.00 |
| <i>Lgals8</i>                                         | lectin, galactose binding, soluble 8                                                                                                                                                                                                                   | 1422662_at   | 2.32 | 0.00 |
| <i>Rrbp1</i>                                          | ribosome binding protein 1                                                                                                                                                                                                                             | 1426123_a_at | 2.32 | 0.00 |
| <i>Gna13</i>                                          | guanine nucleotide binding protein, alpha 13                                                                                                                                                                                                           | 1460317_s_at | 2.32 | 0.00 |
| <i>Irak2</i>                                          | interleukin-1 receptor-associated kinase 2                                                                                                                                                                                                             | 1436507_at   | 2.31 | 0.00 |
| <i>6330412F12Rik</i>                                  | RIKEN cDNA 6330412F12 gene                                                                                                                                                                                                                             | 1420535_a_at | 2.31 | 0.00 |
| <i>Il1r2</i>                                          | interleukin 1 receptor, type II                                                                                                                                                                                                                        | 1419532_at   | 2.31 | 0.00 |
| <i>Rtn4</i>                                           | reticulon 4                                                                                                                                                                                                                                            | 1421116_a_at | 2.31 | 0.01 |
| <i>2610301K12Rik</i>                                  | RIKEN cDNA 2610301K12 gene                                                                                                                                                                                                                             | 1429337_at   | 2.31 | 0.01 |
| <i>Eif4a1</i>                                         | eukaryotic translation initiation factor 4A1                                                                                                                                                                                                           | 1430980_a_at | 2.31 | 0.00 |
| <i>Gins4</i>                                          | GINS complex subunit 4 (Sld5 homolog)                                                                                                                                                                                                                  | 1452598_at   | 2.31 | 0.00 |
| <i>Art5</i>                                           | ADP-ribosyltransferase 5                                                                                                                                                                                                                               | 1451553_at   | 2.31 | 0.00 |
| <i>Rab5c</i>                                          | RAB5C, member RAS oncogene family                                                                                                                                                                                                                      | 1424684_at   | 2.30 | 0.00 |
| <i>BC032204</i>                                       | cDNA sequence BC032204                                                                                                                                                                                                                                 | 1433963_a_at | 2.30 | 0.00 |
| <i>Gdap10</i>                                         | ganglioside-induced differentiation-associated-protein 10                                                                                                                                                                                              | 1420342_at   | 2.30 | 0.00 |
| <i>5230400M03Rik</i>                                  | RIKEN cDNA 5230400M03 gene                                                                                                                                                                                                                             | 1437493_at   | 2.30 | 0.00 |

|                                                      |                                                                                                                               |              |      |      |
|------------------------------------------------------|-------------------------------------------------------------------------------------------------------------------------------|--------------|------|------|
| <i>Tnfrsf10</i>                                      | tumor necrosis factor (ligand) superfamily, member 10                                                                         | 1420412 at   | 2.29 | 0.00 |
| <i>Ccl6</i>                                          | chemokine (C-C motif) ligand 6                                                                                                | 1420249 s at | 2.29 | 0.17 |
| <i>Tmem119</i>                                       | transmembrane protein 119                                                                                                     | 1451344 at   | 2.28 | 0.00 |
| <i>Apobec1</i>                                       | apolipoprotein B editing complex 1                                                                                            | 1451755 a at | 2.28 | 0.00 |
| <i>Uck2</i>                                          | uridine-cytidine kinase 2                                                                                                     | 1426909 at   | 2.28 | 0.00 |
| <i>Noc41</i>                                         | Nucleolar complex associated 4 homolog (S. cerevisiae)                                                                        | 1438095 x at | 2.28 | 0.00 |
| <i>BC055107</i>                                      | cDNA sequence BC055107                                                                                                        | 1435918 at   | 2.28 | 0.00 |
| <i>Cyp4b1</i>                                        | cytochrome P450, family 4, subfamily b, polypeptide 1                                                                         | 1416194 at   | 2.28 | 0.00 |
| <i>Rab4b</i>                                         | RAB4B, member RAS oncogene family                                                                                             | 1451643 a at | 2.27 | 0.00 |
| <i>Sell</i>                                          | selectin, lymphocyte                                                                                                          | 1419481 at   | 2.27 | 0.00 |
| <i>Pnp</i> /// <i>LOC545044</i> /// <i>LOC667034</i> | purine-nucleoside phosphorylase /// similar to purine-nucleoside phosphorylase /// similar to purine-nucleoside phosphorylase | 1453299 a at | 2.27 | 0.00 |
| <i>Parp3</i>                                         | poly (ADP-ribose) polymerase family, member 3                                                                                 | 1426210 x at | 2.27 | 0.00 |
| <i>Cish</i>                                          | cytokine inducible SH2-containing protein                                                                                     | 1448724 at   | 2.27 | 0.00 |
| <i>Pilra</i>                                         | paired immunoglobulin-like type 2 receptor alpha                                                                              | 1427327 at   | 2.27 | 0.00 |
| <i>2410024N18Rik</i>                                 | RIKEN cDNA 2410024N18 gene                                                                                                    | 1452914 at   | 2.27 | 0.00 |
| <i>Hif1a</i>                                         | hypoxia inducible factor 1, alpha subunit                                                                                     | 1427418 a at | 2.27 | 0.02 |
| <i>Cul4b</i>                                         | cullin 4B                                                                                                                     | 1417453 at   | 2.27 | 0.00 |
| <i>3110043J09Rik</i>                                 | RIKEN cDNA 3110043J09 gene                                                                                                    | 1451320 at   | 2.26 | 0.00 |
| <i>Cd24a</i>                                         | CD24a antigen                                                                                                                 | 1437502 x at | 2.26 | 0.00 |
| <i>Slf3</i> /// <i>Slf4</i>                          | schlafen 3 /// schlafen 4                                                                                                     | 1450322 s at | 2.26 | 0.00 |
| <i>Flot1</i>                                         | flotillin 1                                                                                                                   | 1448559 at   | 2.26 | 0.00 |
| <i>Smad1</i>                                         | MAD homolog 1 (Drosophila)                                                                                                    | 1459843 s at | 2.26 | 0.01 |
| <i>Gadd45b</i>                                       | growth arrest and DNA-damage-inducible 45 beta                                                                                | 1450971 at   | 2.25 | 0.00 |
| <i>Igfb4bp</i>                                       | integrin beta 4 binding protein                                                                                               | 1427578 a at | 2.25 | 0.00 |
| <i>Zbtb16</i>                                        | Zinc finger and BTB domain containing 16                                                                                      | 1456986 at   | 2.25 | 0.00 |
| <i>Dph5</i>                                          | DPH5 homolog (S. cerevisiae)                                                                                                  | 1439049 at   | 2.25 | 0.00 |
| <i>Mid1</i>                                          | midline 1                                                                                                                     | 1438239 at   | 2.24 | 0.00 |
| <i>Zfp445</i>                                        | zinc finger protein 445                                                                                                       | 1427254 at   | 2.24 | 0.10 |
| <i>Cd44</i>                                          | CD44 antigen                                                                                                                  | 1423760 at   | 2.24 | 0.00 |
| <i>Pnpo</i>                                          | pyridoxine 5'-phosphate oxidase                                                                                               | 1415793 at   | 2.24 | 0.00 |
| <i>Arid5b</i>                                        | AT rich interactive domain 5B (Mrf1 like)                                                                                     | 1420973 at   | 2.24 | 0.01 |
| ---                                                  | ---                                                                                                                           | 1442025 a at | 2.24 | 0.01 |
| <i>Cd44</i>                                          | CD44 antigen                                                                                                                  | 1434376 at   | 2.24 | 0.00 |
| <i>Pak6</i>                                          | p21 (CDKN1A)-activated kinase 6                                                                                               | 1455200 at   | 2.24 | 0.02 |
| <i>1500032H18Rik</i>                                 | RIKEN cDNA 1500032H18 gene                                                                                                    | 1426133 a at | 2.24 | 0.00 |
| <i>Cyp2b10</i>                                       | cytochrome P450, family 2, subfamily b, polypeptide 10                                                                        | 1451787 at   | 2.24 | 0.05 |
| <i>Trim34</i> /// <i>LOC434218</i>                   | tripartite motif protein 34 /// similar to Tripartite motif protein 34                                                        | 1424857 a at | 2.23 | 0.00 |
| <i>Nubp1</i>                                         | nucleotide binding protein 1                                                                                                  | 1418905 at   | 2.23 | 0.00 |
| ---                                                  | ---                                                                                                                           | 1460268 at   | 2.23 | 0.00 |
| <i>Hen1</i>                                          | hyperpolarization-activated, cyclic nucleotide-gated K+ 1                                                                     | 1450193 at   | 2.23 | 0.02 |
| <i>Slc7a2</i>                                        | solute carrier family 7 (cationic amino acid transporter, v+ svstem), member 2                                                | 1436555 at   | 2.23 | 0.00 |
| <i>1110018G07Rik</i>                                 | RIKEN cDNA 1110018G07 gene                                                                                                    | 1433767 at   | 2.23 | 0.00 |
| <i>Smad1</i>                                         | MAD homolog 1 (Drosophila)                                                                                                    | 1448208 at   | 2.22 | 0.00 |
| <i>Ptpn2</i>                                         | protein tyrosine phosphatase, non-receptor type 2                                                                             | 1438562 a at | 2.22 | 0.01 |
| <i>Pml</i>                                           | promyelocytic leukemia                                                                                                        | 1456103 at   | 2.22 | 0.00 |
| <i>Caenb2</i>                                        | Calcium channel, voltage-dependent, beta 2 subunit                                                                            | 1444693 at   | 2.22 | 0.01 |
| <i>Gmfg</i>                                          | glia maturation factor, gamma                                                                                                 | 1419194 s at | 2.22 | 0.00 |
| <i>Bcl2l1</i>                                        | Bcl2-like 1                                                                                                                   | 1420887 a at | 2.21 | 0.00 |
| <i>H2-K1</i>                                         | Histocompatibility 2, K1, K region                                                                                            | 1450170 x at | 2.21 | 0.00 |
| <i>Tbk1</i>                                          | TANK-binding kinase 1                                                                                                         | 1445571 at   | 2.21 | 0.00 |
| <i>Lrrc59</i>                                        | leucine rich repeat containing 59                                                                                             | 1416235 at   | 2.21 | 0.00 |
| ---                                                  | Transcribed locus                                                                                                             | 1439965 at   | 2.20 | 0.00 |
| <i>Rnase1</i>                                        | ribonuclease, RNase A family, 1 (pancreatic)                                                                                  | 1416523 at   | 2.20 | 0.00 |
| <i>Psmf1</i>                                         | proteasome (prosome, macropain) inhibitor subunit 1                                                                           | 1424370 s at | 2.20 | 0.00 |
| <i>Ctss</i>                                          | cathepsin S                                                                                                                   | 1448591 at   | 2.20 | 0.00 |
| <i>6330412F12Rik</i>                                 | RIKEN cDNA 6330412F12 gene                                                                                                    | 1452776 a at | 2.20 | 0.00 |
| ---                                                  | ---                                                                                                                           | 1442880 at   | 2.20 | 0.00 |
| <i>Lcp2</i>                                          | lymphocyte cytosolic protein 2                                                                                                | 1418641 at   | 2.19 | 0.00 |
| <i>Mmp8</i>                                          | matrix metalloproteinase 8                                                                                                    | 1449366 at   | 2.19 | 0.00 |
| <i>Snord22</i>                                       | small nucleolar RNA, C/D box 22                                                                                               | 1454703 x at | 2.19 | 0.00 |
| <i>Cstb</i>                                          | cystatin B                                                                                                                    | 1422506 a at | 2.19 | 0.00 |
| <i>Tpm3</i>                                          | tropomyosin 3, gamma                                                                                                          | 1449996 a at | 2.19 | 0.02 |
| <i>Serpinb9</i>                                      | serine (or cysteine) peptidase inhibitor, clade B, member 9                                                                   | 1439790 at   | 2.19 | 0.00 |
| <i>5830472M02Rik</i>                                 | RIKEN cDNA 5830472M02 gene                                                                                                    | 1429684 at   | 2.19 | 0.01 |
| <i>Clic4</i>                                         | chloride intracellular channel 4 (mitochondrial)                                                                              | 1438606 a at | 2.19 | 0.00 |
| <i>S3-12</i>                                         | plasma membrane associated protein, S3-12                                                                                     | 1418595 at   | 2.19 | 0.00 |
| <i>Chi3l1</i>                                        | chitinase 3-like 1                                                                                                            | 1451537 at   | 2.19 | 0.00 |
| <i>Syk</i>                                           | spleen tyrosine kinase                                                                                                        | 1425797 a at | 2.19 | 0.00 |
| <i>Fah</i>                                           | fumarylacetoacetate hydrolase                                                                                                 | 1417220 at   | 2.19 | 0.00 |
| <i>5830443L24Rik</i> /// <i>LOC626578</i>            | RIKEN cDNA 5830443L24 gene /// similar to macrophage activation 2 like                                                        | 1418776 at   | 2.19 | 0.01 |
| <i>Atp8b1</i>                                        | ATPase, class I, type 8B, member 1                                                                                            | 1455396 at   | 2.18 | 0.00 |
| <i>Cstb</i>                                          | cystatin B                                                                                                                    | 1422507 at   | 2.18 | 0.00 |
| <i>Tnfrsf6</i>                                       | tumor necrosis factor alpha induced protein 6                                                                                 | 1418424 at   | 2.18 | 0.00 |
| <i>Pim1</i>                                          | proviral integration site 1                                                                                                   | 1423006 at   | 2.18 | 0.00 |
| <i>Scara5</i>                                        | scavenger receptor class A, member 5 (putative)                                                                               | 1451204 at   | 2.18 | 0.00 |
| <i>Fads3</i>                                         | fatty acid desaturase 3                                                                                                       | 1435910 at   | 2.18 | 0.00 |
| <i>Arid5b</i>                                        | AT rich interactive domain 5B (Mrf1 like)                                                                                     | 1434283 at   | 2.17 | 0.00 |
| <i>Art1</i>                                          | ADP-ribosyltransferase 1                                                                                                      | 1422375 a at | 2.17 | 0.00 |
| <i>Fxyd5</i>                                         | FXRD domain-containing ion transport regulator 5                                                                              | 1418296 at   | 2.17 | 0.00 |
| <i>2310016C08Rik</i>                                 | RIKEN cDNA 2310016C08 gene                                                                                                    | 1421031 a at | 2.17 | 0.01 |
| <i>Tgoln1</i>                                        | trans-golgi network protein                                                                                                   | 1423308 at   | 2.17 | 0.00 |
| <i>Tpmt</i>                                          | thiopurine methyltransferase                                                                                                  | 1430889 a at | 2.16 | 0.00 |
| <i>Anxa4</i>                                         | annexin A4                                                                                                                    | 1424176 a at | 2.16 | 0.00 |
| <i>Ptpre</i>                                         | protein tyrosine phosphatase, receptor type, E                                                                                | 1418539 a at | 2.16 | 0.00 |
| <i>0610033I05Rik</i>                                 | RIKEN cDNA 0610033I05 gene                                                                                                    | 1451321 a at | 2.16 | 0.00 |
| <i>Map1lc3b</i>                                      | microtubule-associated protein 1 light chain 3 beta                                                                           | 1415930 a at | 2.16 | 0.00 |
| <i>Msr1</i>                                          | macrophage scavenger receptor 1                                                                                               | 1425434 a at | 2.16 | 0.00 |
| <i>Plscr2</i>                                        | phospholipid scramblase 2                                                                                                     | 1448961 at   | 2.16 | 0.01 |
| <i>2900072G11Rik</i>                                 | RIKEN cDNA 2900072G11 gene                                                                                                    | 1429702 at   | 2.16 | 0.00 |
| <i>Serpin1</i>                                       | serine (or cysteine) peptidase inhibitor, clade G, member 1                                                                   | 1416625 at   | 2.15 | 0.00 |
| <i>Nfkb2</i>                                         | nuclear factor of kappa light polypeptide gene enhancer in B-cells 2, p49/p100                                                | 1425902 a at | 2.15 | 0.00 |
| <i>Slc41a2</i>                                       | solute carrier family 41, member 2                                                                                            | 1452445 at   | 2.14 | 0.00 |
| <i>Pma5</i>                                          | proteasome (prosome, macropain) subunit, alpha type 5                                                                         | 1424681 a at | 2.14 | 0.00 |
| <i>Oas2</i>                                          | 2'-5' oligoadenylate synthetase 2                                                                                             | 1425065 at   | 2.13 | 0.00 |
| <i>Mtus1</i>                                         | mitochondrial tumor suppressor 1                                                                                              | 1454824 s at | 2.13 | 0.00 |
| <i>Hspb1</i>                                         | heat shock protein 1                                                                                                          | 1425964 x at | 2.13 | 0.00 |

|                                                            |                                                                                                                                    |              |      |      |
|------------------------------------------------------------|------------------------------------------------------------------------------------------------------------------------------------|--------------|------|------|
| <i>Nola2</i>                                               | nucleolar protein family A, member 2                                                                                               | 1416605 at   | 2.13 | 0.00 |
| ---                                                        | ---                                                                                                                                | 1443673 x at | 2.13 | 0.00 |
| <i>Oprs1</i>                                               | Opioid receptor, sigma 1                                                                                                           | 1435579 at   | 2.13 | 0.00 |
| <i>Ankrd1</i>                                              | ankyrin repeat domain 1 (cardiac muscle)                                                                                           | 1420991 at   | 2.13 | 0.00 |
| <i>LOC669660</i>                                           | similar to PDZ and LIM domain protein 5 (Enigma homolog) (Enigma-like PDZ and LIM domains protein)                                 | 1422861_s at | 2.13 | 0.02 |
| <i>Acs15</i>                                               | acyl-CoA synthetase long-chain family member 5                                                                                     | 1428082 at   | 2.13 | 0.00 |
| <i>Sdf2l1</i>                                              | stromal cell-derived factor 2-like 1                                                                                               | 1418206 at   | 2.12 | 0.00 |
| <i>Tpm3</i>                                                | tropomyosin 3, gamma                                                                                                               | 1427567 a at | 2.12 | 0.00 |
| <i>Glrx</i>                                                | glutaredoxin                                                                                                                       | 1416592 at   | 2.12 | 0.04 |
| <i>1300018105Rik</i>                                       | RIKEN cDNA 1300018105 gene                                                                                                         | 1451082 at   | 2.12 | 0.00 |
| <i>Lyb6</i>                                                | lymphocyte antigen 6 complex, locus C                                                                                              | 1421571 a at | 2.12 | 0.00 |
| <i>Nek7</i>                                                | NIMA (never in mitosis gene a)-related expressed kinase 7                                                                          | 1444753 at   | 2.12 | 0.00 |
| <i>Gfpt2</i>                                               | glutamine fructose-6-phosphate transaminase 2                                                                                      | 1418753 at   | 2.12 | 0.00 |
| <i>Slc7a6</i>                                              | solute carrier family 7 (cationic amino acid transporter, y+ system), member 6                                                     | 1460541 at   | 2.11 | 0.01 |
| <i>Tbc1d15</i>                                             | TBC1 domain family, member 15                                                                                                      | 1416060 at   | 2.11 | 0.02 |
| <i>Sra1</i>                                                | steroid receptor RNA activator 1                                                                                                   | 1437423 a at | 2.11 | 0.00 |
| <i>2210038L17Rik</i>                                       | RIKEN cDNA 2210038L17 gene                                                                                                         | 1434585 at   | 2.11 | 0.00 |
| <i>Selenbp1</i>                                            | selenium binding protein 1                                                                                                         | 1417580 s at | 2.11 | 0.00 |
| <i>A1480535</i>                                            | expressed sequence A1480535                                                                                                        | 1455320 at   | 2.11 | 0.02 |
| <i>Nek7</i>                                                | NIMA (never in mitosis gene a)-related expressed kinase 7                                                                          | 1442198 at   | 2.11 | 0.02 |
| <i>Aldh3a1</i>                                             | aldehyde dehydrogenase family 3, subfamily A1                                                                                      | 1418752 at   | 2.11 | 0.00 |
| <i>1110014F24Rik</i>                                       | RIKEN cDNA 1110014F24 gene                                                                                                         | 1428781 at   | 2.11 | 0.02 |
| <i>Gas5</i>                                                | growth arrest specific 5                                                                                                           | 1419291 x at | 2.10 | 0.00 |
| <i>Arl4a</i>                                               | ADP-ribosylation factor-like 4A                                                                                                    | 1431429 a at | 2.10 | 0.00 |
| <i>Hfe</i>                                                 | hemochromatosis                                                                                                                    | 1422645 at   | 2.10 | 0.00 |
| <i>Pik3r5</i>                                              | phosphoinositide-3-kinase, regulatory subunit 5, p101                                                                              | 1434980 at   | 2.09 | 0.00 |
| <i>Serinc3</i>                                             | serine incorporator 3                                                                                                              | 1417816 s at | 2.09 | 0.00 |
| <i>2810416G20Rik</i>                                       | RIKEN cDNA 2810416G20 gene                                                                                                         | 1435171 at   | 2.09 | 0.00 |
| <i>Mad212</i>                                              | MAD2 mitotic arrest deficient-like 2 (yeast)                                                                                       | 1460348 at   | 2.09 | 0.00 |
| <i>Mmp14</i>                                               | matrix metalloproteinase 14 (membrane-inserted)                                                                                    | 1448383 at   | 2.09 | 0.00 |
| <i>Tnfaip2</i>                                             | tumor necrosis factor, alpha-induced protein 2                                                                                     | 1438855 x at | 2.09 | 0.02 |
| <i>Gas5</i>                                                | growth arrest specific 5                                                                                                           | 1455904 at   | 2.09 | 0.02 |
| <i>LOC56628</i>                                            | MHC (A.CA/J)(H-2K-f) class I antigen                                                                                               | 1450534 x at | 2.08 | 0.00 |
| <i>Gas5</i>                                                | growth arrest specific 5                                                                                                           | 1436222 at   | 2.08 | 0.01 |
| <i>A1662270</i>                                            | expressed sequence A1662270                                                                                                        | 1434067 at   | 2.08 | 0.01 |
| <i>Tbl1xr1</i>                                             | transducin (beta)-like 1X-linked receptor 1                                                                                        | 1434839 s at | 2.08 | 0.00 |
| <i>St7l</i>                                                | Suppression of tumorigenicity 7-like                                                                                               | 1456363 at   | 2.08 | 0.01 |
| <i>Bak1</i>                                                | BCL2-antagonist/killer 1                                                                                                           | 1418991 at   | 2.08 | 0.00 |
| <i>Socs2</i>                                               | suppressor of cytokine signaling 2                                                                                                 | 1438470 at   | 2.08 | 0.00 |
| <i>Tpm3</i>                                                | tropomyosin 3, gamma                                                                                                               | 1427260 a at | 2.08 | 0.00 |
| <i>Map1lc3b</i>                                            | microtubule-associated protein 1 light chain 3 beta                                                                                | 1415929 at   | 2.08 | 0.00 |
| <i>Slco2a1</i>                                             | solute carrier organic anion transporter family, member 2a1                                                                        | 1420913 at   | 2.07 | 0.00 |
| <i>2310073E15Rik</i>                                       | RIKEN cDNA 2310073E15 gene                                                                                                         | 1428534 at   | 2.07 | 0.00 |
| <i>Itpkc</i>                                               | inositol 1,4,5-trisphosphate 3-kinase C                                                                                            | 1454755 at   | 2.07 | 0.00 |
| <i>Acs14</i>                                               | acyl-CoA synthetase long-chain family member 4                                                                                     | 1433531 at   | 2.07 | 0.04 |
| <i>Stat3</i>                                               | Signal transducer and activator of transcription 3                                                                                 | 1459961 a at | 2.07 | 0.00 |
| <i>C030027K23Rik /// Parp4</i>                             | RIKEN cDNA C030027K23 gene /// poly (ADP-ribose) polymerase family, member 4                                                       | 1452351 at   | 2.07 | 0.00 |
| <i>Ddi2 /// Rsc1a1</i>                                     | DNA-damage inducible protein 2 /// regulatory solute carrier protein, family 1, member 1                                           | 1422560 at   | 2.07 | 0.03 |
| <i>Smad1</i>                                               | MAD homolog 1 (Drosophila)                                                                                                         | 1416081 at   | 2.07 | 0.04 |
| <i>Klhl2</i>                                               | kelch-like 2, Mayven (Drosophila)                                                                                                  | 1426978 at   | 2.07 | 0.02 |
| <i>Cx3cl1</i>                                              | chemokine (C-X3-C motif) ligand 1                                                                                                  | 1415803 at   | 2.07 | 0.00 |
| <i>Nfkbib</i>                                              | nuclear factor of kappa light chain gene enhancer in B-cells inhibitor, beta                                                       | 1421266 s at | 2.07 | 0.00 |
| <i>Atf3</i>                                                | activating transcription factor 3                                                                                                  | 1449363 at   | 2.07 | 0.02 |
| <i>Ear3</i>                                                | eosinophil-associated, ribonuclease A family, member 3                                                                             | 1422412 x at | 2.07 | 0.00 |
| <i>Scap2</i>                                               | src family associated phosphoprotein 2                                                                                             | 1418895 at   | 2.07 | 0.00 |
| <i>Slc43a3</i>                                             | solute carrier family 43, member 3                                                                                                 | 1422788 at   | 2.07 | 0.00 |
| <i>Ihpk2</i>                                               | inositol hexaphosphate kinase 2                                                                                                    | 1428373 at   | 2.06 | 0.00 |
| <i>Msn</i>                                                 | moesin                                                                                                                             | 1421814 at   | 2.06 | 0.00 |
| <i>Etoh1 /// 6230416C02Rik /// LOC667962 /// LOC668009</i> | ethanol induced 1 /// RIKEN cDNA 6230416C02 gene /// similar to zinc finger protein 97 /// similar to zinc finger protein 97       | 1429712_at   | 2.06 | 0.00 |
| <i>Traf3ip2</i>                                            | Traf3 interacting protein 2                                                                                                        | 1448508 at   | 2.06 | 0.00 |
| <i>Tapbp1</i>                                              | TAP binding protein-like                                                                                                           | 1424961 at   | 2.06 | 0.00 |
| <i>Glpr2</i>                                               | GLI pathogenesis-related 2                                                                                                         | 1428492 at   | 2.06 | 0.00 |
| <i>Clic5</i>                                               | chloride intracellular channel 5                                                                                                   | 1456873 at   | 2.06 | 0.01 |
| <i>Cd300lf</i>                                             | CD300 antigen like family member F                                                                                                 | 1427994 at   | 2.06 | 0.00 |
| <i>4933426M11Rik</i>                                       | RIKEN cDNA 4933426M11 gene                                                                                                         | 1454606 at   | 2.06 | 0.00 |
| <i>Cdc42ep4</i>                                            | CDC42 effector protein (Rho GTPase binding) 4                                                                                      | 1416511 a at | 2.06 | 0.00 |
| <i>Capn10</i>                                              | calpain 10                                                                                                                         | 1416265 at   | 2.06 | 0.00 |
| <i>Rac1</i>                                                | RAS-related C3 botulinum substrate 1                                                                                               | 1423734 at   | 2.05 | 0.00 |
| <i>Lpin3</i>                                               | lipin 3                                                                                                                            | 1449440 at   | 2.05 | 0.00 |
| <i>Nts</i>                                                 | neurotensin                                                                                                                        | 1422860 at   | 2.05 | 0.00 |
| <i>Slc10a3</i>                                             | solute carrier family 10 (sodium/bile acid cotransporter family), member 3                                                         | 1451227 a at | 2.05 | 0.00 |
| <i>Ctps2</i>                                               | cytidine 5'-triphosphate synthase 2                                                                                                | 1448111 at   | 2.05 | 0.00 |
| <i>Tcirg1</i>                                              | T-cell, immune regulator 1, ATPase, H+ transporting, lysosomal V0 protein A3                                                       | 1420635 a at | 2.05 | 0.00 |
| <i>Socs2</i>                                               | suppressor of cytokine signaling 2                                                                                                 | 1418507 s at | 2.05 | 0.01 |
| <i>Nek7</i>                                                | NIMA (never in mitosis gene a)-related expressed kinase 7                                                                          | 1444447 at   | 2.05 | 0.00 |
| <i>Gtf3c3</i>                                              | general transcription factor IIC, polypeptide 3                                                                                    | 1454765 at   | 2.05 | 0.00 |
| <i>Cndp2</i>                                               | CNDP dipeptidase 2 (metalloproteinase M20 family)                                                                                  | 1448263 at   | 2.05 | 0.00 |
| <i>4833438C02Rik</i>                                       | RIKEN cDNA 4833438C02 gene                                                                                                         | 1436524 at   | 2.04 | 0.00 |
| <i>Nek6 /// LOC674247</i>                                  | NIMA (never in mitosis gene a)-related expressed kinase 6 /// similar to NIMA (never in mitosis gene a)-related expressed kinase 6 | 1425850_a at | 2.04 | 0.00 |
| <i>LOC669660</i>                                           | similar to PDZ and LIM domain protein 5 (Enigma homolog) (Enigma-like PDZ and LIM domains protein)                                 | 1422862_at   | 2.04 | 0.02 |
| <i>2610002M06Rik</i>                                       | RIKEN cDNA 2610002M06 gene                                                                                                         | 1419690 at   | 2.04 | 0.01 |
| <i>Chmp4b</i>                                              | chromatin modifying protein 4B                                                                                                     | 1426240 at   | 2.04 | 0.00 |
| <i>Gramd1a</i>                                             | GRAM domain containing 1A                                                                                                          | 1416708 a at | 2.04 | 0.00 |
| <i>Rasip1</i>                                              | Ras interacting protein 1                                                                                                          | 1428016 a at | 2.04 | 0.00 |
| <i>Apxl /// LOC670546</i>                                  | apical protein, Xenopus laevis-like /// similar to Apical-like protein (APXL protein)                                              | 1433992 at   | 2.04 | 0.00 |
| <i>Selenbp1</i>                                            | selenium binding protein 1                                                                                                         | 1450699 at   | 2.04 | 0.00 |
| <i>Psmf1</i>                                               | proteasome (prosome, macropain) inhibitor subunit 1                                                                                | 1424369 at   | 2.04 | 0.00 |
| <i>Galnt12</i>                                             | UDP-N-acetyl-alpha-D-galactosamine:polypeptide N-acetylgalactosaminyltransferase-like 2                                            | 1429235_at   | 2.04 | 0.00 |
| <i>Pma5</i>                                                | proteasome (prosome, macropain) subunit, alpha type 5                                                                              | 1434356 a at | 2.04 | 0.00 |
| <i>Limd1</i>                                               | LIM domains containing 1                                                                                                           | 1422731 at   | 2.04 | 0.00 |
| <i>Pgs1</i>                                                | phosphatidylglycerophosphate synthase 1                                                                                            | 1455229 x at | 2.04 | 0.00 |
| <i>Crbn</i>                                                | cereblon                                                                                                                           | 1423094 at   | 2.04 | 0.00 |

|                                                                   |                                                                                                                                                                                                                  |              |      |      |
|-------------------------------------------------------------------|------------------------------------------------------------------------------------------------------------------------------------------------------------------------------------------------------------------|--------------|------|------|
| <i>Syn2</i>                                                       | synapsin II                                                                                                                                                                                                      | 1428460 at   | 2.03 | 0.00 |
| <i>Erec1</i>                                                      | excision repair cross-complementing rodent repair deficiency, complementation group 1                                                                                                                            | 1417328 at   | 2.03 | 0.00 |
| <i>Ctsz</i>                                                       | cathepsin Z                                                                                                                                                                                                      | 1417869 s at | 2.03 | 0.00 |
| <i>Svk</i>                                                        | spleen tyrosine kinase                                                                                                                                                                                           | 1418261 at   | 2.03 | 0.00 |
| <i>4930486L24Rik</i>                                              | RIKEN cDNA 4930486L24 gene                                                                                                                                                                                       | 1430051 at   | 2.03 | 0.02 |
| <i>LOC669660</i>                                                  | similar to PDZ and LIM domain protein 5 (Enigma homolog) (Enigma-like PDZ and LIM domains protein)                                                                                                               | 1427475_a at | 2.03 | 0.00 |
| <i>Loxl3</i>                                                      | lysyl oxidase-like 3                                                                                                                                                                                             | 1418269 at   | 2.03 | 0.00 |
| <i>Lrp8</i>                                                       | low density lipoprotein receptor-related protein 8, apolipoprotein e receptor                                                                                                                                    | 1440882 at   | 2.03 | 0.02 |
| <i>Cdc42ep4</i>                                                   | CDC42 effector protein (Rho GTPase binding) 4                                                                                                                                                                    | 1436801 x at | 2.02 | 0.00 |
| <i>9830115L13Rik</i>                                              | RIKEN cDNA 9830115L13 gene                                                                                                                                                                                       | 1436183 at   | 2.02 | 0.00 |
| <i>Gas5</i>                                                       | growth arrest specific 5                                                                                                                                                                                         | 1449410 a at | 2.02 | 0.00 |
| <i>Man2a1</i>                                                     | mannosidase 2, alpha 1                                                                                                                                                                                           | 1448647 at   | 2.01 | 0.00 |
| <i>Phacr1</i>                                                     | phosphatase and actin regulator 1                                                                                                                                                                                | 1454832 at   | 2.01 | 0.00 |
| <i>5830428H23Rik</i>                                              | RIKEN cDNA 5830428H23 gene                                                                                                                                                                                       | 1436672 at   | 2.01 | 0.00 |
| <i>Eif4a1</i>                                                     | eukaryotic translation initiation factor 4A1                                                                                                                                                                     | 1427058 at   | 2.01 | 0.00 |
| <i>Nucb2</i>                                                      | nucleobindin 2                                                                                                                                                                                                   | 1418355 at   | 2.01 | 0.00 |
| <i>Cp</i>                                                         | ceruloplasmin                                                                                                                                                                                                    | 1448735 at   | 2.01 | 0.00 |
| <i>Shc1</i>                                                       | src homology 2 domain-containing transforming protein C1                                                                                                                                                         | 1422853 at   | 2.01 | 0.00 |
| <i>Ncf1</i>                                                       | neutrophil cytosolic factor 1                                                                                                                                                                                    | 1456772 at   | 2.01 | 0.00 |
| <i>5830472M02Rik</i>                                              | RIKEN cDNA 5830472M02 gene                                                                                                                                                                                       | 1428457 at   | 2.01 | 0.00 |
| <i>Raph1</i>                                                      | Ras association (RalGDS/AF-6) and pleckstrin homology domains 1                                                                                                                                                  | 1456918 at   | 2.01 | 0.00 |
| <i>Bnip3</i>                                                      | BCL2/adenovirus E1B interacting protein 1, NIP3                                                                                                                                                                  | 1422470 at   | 2.01 | 0.00 |
| <i>Ccnd3</i>                                                      | Cyclin D3                                                                                                                                                                                                        | 1437584 at   | 2.01 | 0.02 |
| <i>Snord22</i>                                                    | small nucleolar RNA, C/D box 22                                                                                                                                                                                  | 1437658 a at | 2.01 | 0.01 |
| <i>Gch1</i>                                                       | GTP cyclohydrolase 1                                                                                                                                                                                             | 1420499 at   | 2.01 | 0.00 |
| <i>Parp11</i>                                                     | poly (ADP-ribose) polymerase family, member 11                                                                                                                                                                   | 1434139 at   | 2.01 | 0.00 |
| <i>Cd44</i>                                                       | CD44 antigen                                                                                                                                                                                                     | 1452483 a at | 2.00 | 0.01 |
| <i>Tor3a</i>                                                      | torsin family 3, member A                                                                                                                                                                                        | 1450454 at   | 2.00 | 0.00 |
| <i>Gng12</i>                                                      | guanine nucleotide binding protein (G protein), gamma 12                                                                                                                                                         | 1455089 at   | 2.00 | 0.00 |
| <i>Ugdh</i>                                                       | UDP-glucose dehydrogenase                                                                                                                                                                                        | 1416308 at   | 2.00 | 0.00 |
| <i>Clqb</i>                                                       | complement component 1, q subcomponent, beta polypeptide                                                                                                                                                         | 1437726 x at | 2.00 | 0.02 |
| <i>Tuba6 // LOC626534</i>                                         | tubulin, alpha 6 // similar to Tubulin alpha-6 chain (Alpha-tubulin 6)                                                                                                                                           | 1448232 x at | 2.00 | 0.00 |
| <i>D2Erd391e</i>                                                  | DNA segment, Chr 2, ERATO Doi 391, expressed                                                                                                                                                                     | 1423794 at   | 2.00 | 0.00 |
| <i>Itea5</i>                                                      | integrin alpha 5 (fibronectin receptor alpha)                                                                                                                                                                    | 1423267 s at | 1.99 | 0.00 |
| <i>Kcna5</i>                                                      | potassium voltage-gated channel, shaker-related subfamily, member 5                                                                                                                                              | 1417680 at   | 1.99 | 0.02 |
| <i>Samhd1</i>                                                     | SAM domain and HD domain, 1                                                                                                                                                                                      | 1444064 at   | 1.99 | 0.00 |
| <i>Ptp4a1 // LOC433406 // LOC627166 // LOC627200 // LOC667723</i> | protein tyrosine phosphatase 4a1 // protein tyrosine phosphatase 4a1-like // protein tyrosine phosphatase 4a1 pseudogene // protein tyrosine phosphatase 4a1-like // similar to protein tyrosine phosphatase 4a1 | 1438657_x at | 1.99 | 0.00 |
| <i>Rai14</i>                                                      | retinoic acid induced 14                                                                                                                                                                                         | 1417401 at   | 1.99 | 0.02 |
| <i>9230105E10Rik</i>                                              | RIKEN cDNA 9230105E10 gene                                                                                                                                                                                       | 1445271 at   | 1.99 | 0.02 |
| <i>Chst11 // Phacr1</i>                                           | carbohydrate sulfotransferase 11 // phosphatase and actin regulator 1                                                                                                                                            | 1456606 a at | 1.99 | 0.01 |
| <i>Acs14</i>                                                      | acyl-CoA synthetase long-chain family member 4                                                                                                                                                                   | 1451828 a at | 1.99 | 0.02 |
| <i>Cdkn2d</i>                                                     | cyclin-dependent kinase inhibitor 2D (p19, inhibits CDK4)                                                                                                                                                        | 1416253 at   | 1.99 | 0.00 |
| <i>Tsc22d1</i>                                                    | TSC22 domain family, member 1                                                                                                                                                                                    | 1454758 a at | 1.99 | 0.00 |
| <i>Gna13</i>                                                      | guanine nucleotide binding protein, alpha 13                                                                                                                                                                     | 1433749 at   | 1.98 | 0.02 |
| <i>Ccrn41 // LOC280487 // LOC639390</i>                           | CCR4 carbon catabolite repression 4-like (S. cerevisiae) // pol polyprotein // gag protein                                                                                                                       | 1455316_x at | 1.98 | 0.00 |
| <i>Akap2</i>                                                      | A kinase (PRKA) anchor protein 2                                                                                                                                                                                 | 1449168 a at | 1.98 | 0.04 |
| <i>Pla1a</i>                                                      | phospholipase A1 member A                                                                                                                                                                                        | 1417785 at   | 1.98 | 0.00 |
| <i>Cd24a</i>                                                      | CD24a antigen                                                                                                                                                                                                    | 1448182 a at | 1.98 | 0.00 |
| <i>Camkk2</i>                                                     | calcium/calmodulin-dependent protein kinase kinase 2, beta                                                                                                                                                       | 1424474 a at | 1.98 | 0.00 |
| <i>LOC669660</i>                                                  | similar to PDZ and LIM domain protein 5 (Enigma homolog) (Enigma-like PDZ and LIM domains protein)                                                                                                               | 1450786_x at | 1.98 | 0.07 |
| <i>Adamts14</i>                                                   | ADAMTS-like 4                                                                                                                                                                                                    | 1451932 a at | 1.98 | 0.00 |
| <i>Anxa4</i>                                                      | annexin A4                                                                                                                                                                                                       | 1421223 a at | 1.98 | 0.00 |
| <i>Tgfb2</i>                                                      | transforming growth factor, beta receptor II                                                                                                                                                                     | 1426397 at   | 1.98 | 0.00 |
| <i>Phb</i>                                                        | Prohibitin                                                                                                                                                                                                       | 1435144 at   | 1.98 | 0.01 |
| <i>Ctm</i>                                                        | cortactin                                                                                                                                                                                                        | 1421315 s at | 1.98 | 0.00 |
| <i>Mafk</i>                                                       | v-maf musculoaponeurotic fibrosarcoma oncogene family, protein K (avian)                                                                                                                                         | 1418616 at   | 1.98 | 0.00 |
| <i>Pgm3</i>                                                       | phosphoglucomutase 3                                                                                                                                                                                             | 1428228 at   | 1.98 | 0.00 |
| <i>1300018I05Rik</i>                                              | RIKEN cDNA 1300018I05 gene                                                                                                                                                                                       | 1423681 at   | 1.98 | 0.00 |
| <i>Sik11ip</i>                                                    | serine/threonine kinase 11 interacting protein                                                                                                                                                                   | 1431792 a at | 1.98 | 0.00 |
| <i>Flot2</i>                                                      | flotillin 2                                                                                                                                                                                                      | 1438164 x at | 1.98 | 0.00 |
| <i>2310005L22Rik</i>                                              | RIKEN cDNA 2310005L22 gene                                                                                                                                                                                       | 1436040 at   | 1.98 | 0.02 |
| <i>Art3</i>                                                       | ADP-ribosyltransferase 3                                                                                                                                                                                         | 1452474 a at | 1.98 | 0.00 |
| <i>---</i>                                                        | ---                                                                                                                                                                                                              | 1442026 at   | 1.97 | 0.02 |
| <i>5830400J07Rik</i>                                              | RIKEN cDNA 5830400J07 gene                                                                                                                                                                                       | 1431689 at   | 1.97 | 0.00 |
| <i>Sfi1 // LOC673420 // LOC673566</i>                             | Sfi1 homolog, spindle assembly associated (yeast) // similar to spindle assembly associated Sfi1 homolog isoform b // similar to Sfi1 homolog, spindle assembly associated (yeast)                               | 1447901_x at | 1.97 | 0.04 |
| <i>Zwint</i>                                                      | ZW10 interactor                                                                                                                                                                                                  | 1423724 at   | 1.97 | 0.00 |
| <i>Tmbim1</i>                                                     | transmembrane BAX inhibitor motif containing 1                                                                                                                                                                   | 1417162 at   | 1.97 | 0.00 |
| <i>Dbnl</i>                                                       | drebrin-like                                                                                                                                                                                                     | 1460334 at   | 1.97 | 0.00 |
| <i>Dctn6</i>                                                      | dynactin 6                                                                                                                                                                                                       | 1416499 a at | 1.97 | 0.02 |
| <i>Eif4e2</i>                                                     | eukaryotic translation initiation factor 4E member 2                                                                                                                                                             | 1435803 a at | 1.97 | 0.00 |
| <i>Tlr4</i>                                                       | toll-like receptor 4                                                                                                                                                                                             | 1418163 at   | 1.97 | 0.00 |
| <i>Coro1a</i>                                                     | coronin, actin binding protein 1A                                                                                                                                                                                | 1416246 a at | 1.97 | 0.01 |
| <i>Cd302</i>                                                      | CD302 antigen                                                                                                                                                                                                    | 1448919 at   | 1.96 | 0.00 |
| <i>Tnfaip2</i>                                                    | tumor necrosis factor, alpha-induced protein 2                                                                                                                                                                   | 1416273 at   | 1.96 | 0.01 |
| <i>A330021E22Rik</i>                                              | RIKEN cDNA A330021E22 gene                                                                                                                                                                                       | 1440796 at   | 1.96 | 0.00 |
| <i>Slc2a1</i>                                                     | solute carrier family 2 (facilitated glucose transporter), member 1                                                                                                                                              | 1426600 at   | 1.96 | 0.00 |
| <i>Sertad1</i>                                                    | SERTA domain containing 1                                                                                                                                                                                        | 1417406 at   | 1.96 | 0.00 |
| <i>Txnrd1</i>                                                     | thioredoxin reductase 1                                                                                                                                                                                          | 1421529 a at | 1.96 | 0.00 |
| <i>Art1</i>                                                       | ADP-ribosyltransferase 1                                                                                                                                                                                         | 1451372 a at | 1.96 | 0.00 |
| <i>Entpd1</i>                                                     | ectonucleoside triphosphate diphosphohydrolase 1                                                                                                                                                                 | 1423326 at   | 1.96 | 0.00 |
| <i>2610307O08Rik</i>                                              | RIKEN cDNA 2610307O08 gene                                                                                                                                                                                       | 1427911 at   | 1.95 | 0.00 |
| <i>AB124611</i>                                                   | cDNA sequence AB124611                                                                                                                                                                                           | 1438475 at   | 1.95 | 0.00 |
| <i>5033414K04Rik</i>                                              | RIKEN cDNA 5033414K04 gene                                                                                                                                                                                       | 1440790 x at | 1.95 | 0.00 |
| <i>Psm11</i>                                                      | proteasome (prosome, macropain) 26S subunit, non-ATPase, 11                                                                                                                                                      | 1429370 a at | 1.95 | 0.00 |
| <i>Hspb1</i>                                                      | heat shock protein 1                                                                                                                                                                                             | 1422943 a at | 1.95 | 0.00 |
| <i>Serinc3</i>                                                    | serine incorporator 3                                                                                                                                                                                            | 1448847 at   | 1.95 | 0.00 |
| <i>Nubp1</i>                                                      | nucleotide binding protein 1                                                                                                                                                                                     | 1430778 a at | 1.95 | 0.00 |
| <i>Slc39a1</i>                                                    | solute carrier family 39 (zinc transporter), member 1                                                                                                                                                            | 1424424 at   | 1.94 | 0.00 |
| <i>Ddx21</i>                                                      | DEAD (Asp-Glu-Ala-Asp) box polypeptide 21                                                                                                                                                                        | 1448270 at   | 1.94 | 0.01 |
| <i>Ebp</i>                                                        | phenylalkylamine Ca2+ antagonist (emopamil) binding protein                                                                                                                                                      | 1416667 at   | 1.94 | 0.00 |

|                                                                          |                                                                                                                                                          |              |      |      |
|--------------------------------------------------------------------------|----------------------------------------------------------------------------------------------------------------------------------------------------------|--------------|------|------|
| <i>Ube1l</i>                                                             | ubiquitin-activating enzyme E1-like                                                                                                                      | 1437317 at   | 1.94 | 0.00 |
| <i>Fstl3</i>                                                             | folliculin-like 3                                                                                                                                        | 1422803 at   | 1.94 | 0.00 |
| <i>Rarres2</i>                                                           | retinoic acid receptor responder (tazarotene induced) 2                                                                                                  | 1437902 s at | 1.94 | 0.00 |
| <i>Arpc1b</i>                                                            | actin related protein 2/3 complex, subunit 1B                                                                                                            | 1416226 at   | 1.94 | 0.00 |
| <i>Stx11</i>                                                             | syntaxin 11                                                                                                                                              | 1453228 at   | 1.94 | 0.03 |
| <i>Serinc3</i>                                                           | serine incorporator 3                                                                                                                                    | 1434548 at   | 1.93 | 0.00 |
| <i>Nek7</i>                                                              | NIMA (never in mitosis gene a)-related expressed kinase 7                                                                                                | 1416817 at   | 1.93 | 0.00 |
| <i>Oscn6</i>                                                             | quiescin Q6                                                                                                                                              | 1420832 at   | 1.93 | 0.00 |
| <i>Gcnt2</i>                                                             | glucosaminyl (N-acetyl) transferase 2, I-branching enzyme                                                                                                | 1430826 s at | 1.93 | 0.02 |
| <i>Scarb2</i>                                                            | scavenger receptor class B, member 2                                                                                                                     | 1460235 at   | 1.93 | 0.00 |
| <i>Tlk2</i>                                                              | tousled-like kinase 2 (Arabidopsis)                                                                                                                      | 1454018 at   | 1.93 | 0.02 |
| <i>Coro1a</i>                                                            | coronin, actin binding protein 1A                                                                                                                        | 1455269 a at | 1.93 | 0.01 |
| <i>Cxcl12</i>                                                            | chemokine (C-X-C motif) ligand 12                                                                                                                        | 1448823 at   | 1.93 | 0.00 |
| <i>Rnf122</i>                                                            | ring finger protein 122                                                                                                                                  | 1447101 at   | 1.93 | 0.00 |
| ---                                                                      | ---                                                                                                                                                      | 1416035 at   | 1.93 | 0.02 |
| <i>Slc43a2</i>                                                           | solute carrier family 43, member 2                                                                                                                       | 1434308 at   | 1.93 | 0.00 |
| <i>Ercc1</i>                                                             | excision repair cross-complementing rodent repair deficiency, complementation group 1                                                                    | 1437447 s at | 1.93 | 0.00 |
| <i>Il6ra</i>                                                             | interleukin 6 receptor, alpha                                                                                                                            | 1452416 at   | 1.93 | 0.00 |
| <i>Rarres2</i>                                                           | retinoic acid receptor responder (tazarotene induced) 2                                                                                                  | 1428538 s at | 1.92 | 0.00 |
| <i>Pnpla2</i>                                                            | patatin-like phospholipase domain containing 2                                                                                                           | 1428591 at   | 1.92 | 0.00 |
| <i>Tfdp2</i>                                                             | transcription factor Dp 2                                                                                                                                | 1437174 at   | 1.92 | 0.00 |
| 2010209O12Rik                                                            | RIKEN cDNA 2010209O12 gene                                                                                                                               | 1452170 at   | 1.92 | 0.00 |
| <i>Syn2</i>                                                              | synapsin II                                                                                                                                              | 1460230 at   | 1.92 | 0.00 |
| ---                                                                      | ---                                                                                                                                                      | 1435263 at   | 1.92 | 0.00 |
| <i>Cggbp1</i>                                                            | CGG triplet repeat binding protein 1                                                                                                                     | 1455658 at   | 1.92 | 0.00 |
| <i>Rtok3</i>                                                             | RIO kinase 3 (yeast)                                                                                                                                     | 1422650 a at | 1.92 | 0.00 |
| <i>Erv6</i>                                                              | ets variant gene 6 (TEL oncogene)                                                                                                                        | 1434880 at   | 1.92 | 0.00 |
| <i>Tpm3</i>                                                              | Tropomyosin 3, gamma                                                                                                                                     | 1436958 x at | 1.92 | 0.00 |
| <i>Tmem106a</i>                                                          | transmembrane protein 106A                                                                                                                               | 1425025 at   | 1.91 | 0.00 |
| <i>Gldc</i>                                                              | glycine decarboxylase                                                                                                                                    | 1416049 at   | 1.91 | 0.00 |
| <i>Csnk1d</i>                                                            | casein kinase 1, delta                                                                                                                                   | 1418889 a at | 1.91 | 0.00 |
| <i>Pgs1</i>                                                              | phosphatidylglycerophosphate synthase 1                                                                                                                  | 1454045 at   | 1.91 | 0.00 |
| <i>Ccrn4l</i> /// <i>Sgip1</i> /// <i>LOC280487</i> /// <i>LOC639390</i> | CCR4 carbon catabolite repression 4-like (S. cerevisiae) /// SH3-domain GRB2-like (endophilin) interacting protein 1 /// pol polyprotein /// gag protein | 1448715_x at | 1.91 | 0.00 |
| <i>Gag</i>                                                               | Gag                                                                                                                                                      | 1451626 x at | 1.90 | 0.00 |
| <i>LOC669660</i>                                                         | similar to PDZ and LIM domain protein 5 (Enigma homolog) (Enigma-like PDZ and LIM domains protein)                                                       | 1422863_s at | 1.90 | 0.02 |
| <i>Klf6</i>                                                              | Kruppel-like factor 6                                                                                                                                    | 1418280 at   | 1.90 | 0.06 |
| <i>Nola2</i>                                                             | nucleolar protein family A, member 2                                                                                                                     | 1416606 s at | 1.90 | 0.00 |
| <i>Rhou</i>                                                              | ras homolog gene family, member U                                                                                                                        | 1449027 at   | 1.90 | 0.00 |
| <i>Trim25</i>                                                            | tripartite motif protein 25                                                                                                                              | 1426415 a at | 1.90 | 0.00 |
| 2610301K12Rik                                                            | RIKEN cDNA 2610301K12 gene                                                                                                                               | 1429336 at   | 1.90 | 0.10 |
| <i>B4galt1</i>                                                           | UDP-Gal:betaGlcNAc beta 1,4- galactosyltransferase, polypeptide 1                                                                                        | 1418014 a at | 1.90 | 0.00 |
| <i>BC063749</i>                                                          | cDNA sequence BC063749                                                                                                                                   | 1433943 at   | 1.90 | 0.00 |
| <i>Tdrd7</i>                                                             | tudor domain containing 7                                                                                                                                | 1426716 at   | 1.90 | 0.00 |
| <i>Il1r1</i>                                                             | interleukin 1 receptor, type I                                                                                                                           | 1448950 at   | 1.90 | 0.00 |
| <i>Tgfb2</i>                                                             | transforming growth factor, beta 2                                                                                                                       | 1450922 a at | 1.90 | 0.05 |
| <i>Pes1</i>                                                              | pescadillo homolog 1, containing BRCT domain (zebrafish)                                                                                                 | 1416172 at   | 1.90 | 0.00 |
| <i>Grn</i>                                                               | granulin                                                                                                                                                 | 1448148 at   | 1.90 | 0.00 |
| <i>B4galt1</i>                                                           | UDP-Gal:betaGlcNAc beta 1,4- galactosyltransferase, polypeptide 1                                                                                        | 1458616 at   | 1.89 | 0.00 |
| 2010106G01Rik                                                            | RIKEN cDNA 2010106G01 gene                                                                                                                               | 1425193 at   | 1.89 | 0.02 |
| <i>Kb1bd11</i> /// <i>LOC632344</i>                                      | kelch repeat and BTB (POZ) domain containing 11 /// similar to Protein KIAA0711                                                                          | 1435465 at   | 1.89 | 0.04 |
| <i>Grn</i>                                                               | granulin                                                                                                                                                 | 1438629 x at | 1.89 | 0.00 |
| <i>Mcl1</i>                                                              | myeloid cell leukemia sequence 1                                                                                                                         | 1416881 at   | 1.89 | 0.00 |
| <i>Plat</i>                                                              | plasminogen activator, tissue                                                                                                                            | 1415806 at   | 1.89 | 0.01 |
| <i>Adar</i>                                                              | adenosine deaminase, RNA-specific                                                                                                                        | 1434268 at   | 1.89 | 0.00 |
| A930035D04Rik                                                            | RIKEN cDNA A930035D04 gene                                                                                                                               | 1436942 at   | 1.89 | 0.00 |
| <i>Chd6</i>                                                              | chromodomain helicase DNA binding protein 6                                                                                                              | 1427384 at   | 1.89 | 0.01 |
| 0610041E09Rik                                                            | RIKEN cDNA 0610041E09 gene                                                                                                                               | 1425780 a at | 1.89 | 0.01 |
| <i>Adam8</i>                                                             | a disintegrin and metalloproteinase domain 8                                                                                                             | 1416871 at   | 1.89 | 0.00 |
| ---                                                                      | ---                                                                                                                                                      | 1435833 at   | 1.89 | 0.00 |
| <i>Stno</i>                                                              | Strawberry notch homolog (Drosophila)                                                                                                                    | 1441840 x at | 1.89 | 0.02 |
| <i>Nek7</i>                                                              | NIMA (never in mitosis gene a)-related expressed kinase 7                                                                                                | 1416816 at   | 1.89 | 0.00 |
| <i>Tpbp</i>                                                              | trophoblast glycoprotein                                                                                                                                 | 1423311 s at | 1.88 | 0.00 |
| <i>Ptpn2</i>                                                             | protein tyrosine phosphatase, non-receptor type 2                                                                                                        | 1425198 at   | 1.88 | 0.02 |
| <i>Lrrc59</i>                                                            | leucine rich repeat containing 59                                                                                                                        | 1416234 at   | 1.88 | 0.00 |
| A1851523                                                                 | expressed sequence A1851523                                                                                                                              | 1440156 s at | 1.88 | 0.00 |
| <i>Josd3</i>                                                             | Josephin domain containing 3                                                                                                                             | 1430147 a at | 1.88 | 0.00 |
| <i>Cab39l</i>                                                            | calcium binding protein 39-like                                                                                                                          | 1449966 s at | 1.88 | 0.00 |
| <i>Ell</i>                                                               | elongation factor RNA polymerase II                                                                                                                      | 1460643 at   | 1.88 | 0.00 |
| <i>Gpr178</i>                                                            | G protein-coupled receptor 178                                                                                                                           | 1435948 at   | 1.88 | 0.00 |
| <i>LOC677168</i>                                                         | hypothetical protein LOC677168                                                                                                                           | 1453939 x at | 1.88 | 0.00 |
| <i>Dcn</i>                                                               | decorin                                                                                                                                                  | 1441506 at   | 1.88 | 0.00 |
| <i>Tmem2</i>                                                             | transmembrane protein 2                                                                                                                                  | 1451458 at   | 1.87 | 0.02 |
| <i>Nubp2</i>                                                             | nucleotide binding protein 2                                                                                                                             | 1459842 x at | 1.87 | 0.00 |
| <i>Ugcg</i>                                                              | UDP-glucose ceramide glucosyltransferase                                                                                                                 | 1435133 at   | 1.87 | 0.00 |
| <i>Gnl3</i>                                                              | guanine nucleotide binding protein-like 3 (nucleolar)                                                                                                    | 1433656 a at | 1.87 | 0.00 |
| A1843639                                                                 | expressed sequence A1843639                                                                                                                              | 1436614 at   | 1.87 | 0.02 |
| <i>Atf4</i>                                                              | activating transcription factor 4                                                                                                                        | 1438992 x at | 1.87 | 0.01 |
| <i>Cxcl16</i>                                                            | chemokine (C-X-C motif) ligand 16                                                                                                                        | 1418718 at   | 1.87 | 0.00 |
| <i>Uck2</i>                                                              | uridine-cytidine kinase 2                                                                                                                                | 1439741 x at | 1.87 | 0.00 |
| <i>Mocos</i>                                                             | molybdenum cofactor sulfuryase                                                                                                                           | 1429352 at   | 1.87 | 0.00 |
| <i>Fen1</i>                                                              | flap structure specific endonuclease 1                                                                                                                   | 1436454 x at | 1.87 | 0.00 |
| <i>Amotl2</i>                                                            | angiominin like 2                                                                                                                                        | 1452387 a at | 1.87 | 0.00 |
| <i>Slc31a2</i>                                                           | solute carrier family 31, member 2                                                                                                                       | 1453721 a at | 1.87 | 0.00 |
| <i>Pgs1</i>                                                              | phosphatidylglycerophosphate synthase 1                                                                                                                  | 1454046 x at | 1.87 | 0.00 |
| <i>Tbl1xr1</i>                                                           | transducin (beta)-like 1X-linked receptor 1                                                                                                              | 1422761 at   | 1.87 | 0.03 |
| <i>Timp4</i>                                                             | tissue inhibitor of metalloproteinase 4                                                                                                                  | 1423405 at   | 1.87 | 0.03 |
| <i>Zfp313</i>                                                            | Zinc finger protein 313                                                                                                                                  | 1438257 at   | 1.87 | 0.00 |
| <i>Clu</i>                                                               | clusterin                                                                                                                                                | 1418626 a at | 1.87 | 0.00 |
| <i>Myd116</i>                                                            | myeloid differentiation primary response gene 116                                                                                                        | 1448325 at   | 1.87 | 0.00 |
| <i>Syn2</i>                                                              | synapsin II                                                                                                                                              | 1449030 at   | 1.87 | 0.03 |
| <i>Cib1</i>                                                              | calcium and integrin binding 1 (calmyrin)                                                                                                                | 1448564 at   | 1.87 | 0.00 |
| <i>Plekhc1</i>                                                           | pleckstrin homology domain containing, family C (with FERM domain) member 1                                                                              | 1434181 at   | 1.86 | 0.02 |
| <i>Pfkp</i>                                                              | phosphofructokinase, platelet                                                                                                                            | 1416069 at   | 1.86 | 0.00 |
| <i>Bicd1</i>                                                             | bicaudal D homolog 1 (Drosophila)                                                                                                                        | 1451684 a at | 1.86 | 0.00 |



|                                           |                                                                                                                    |              |      |      |
|-------------------------------------------|--------------------------------------------------------------------------------------------------------------------|--------------|------|------|
| <i>Plekha4</i>                            | pleckstrin homology domain containing, family A (phosphoinositide binding specific) member 4                       | 1426013_s_at | 1.86 | 0.00 |
| <i>Entpd1</i>                             | ectonucleoside triphosphate diphosphohydrolase 1                                                                   | 1450939_at   | 1.86 | 0.00 |
| <i>Ptprk</i>                              | protein tyrosine phosphatase, receptor type, K                                                                     | 1423277_at   | 1.86 | 0.00 |
| <i>Wdr26</i>                              | WD repeat domain 26                                                                                                | 1423961_at   | 1.86 | 0.00 |
| <i>A1838057</i>                           | expressed sequence A1838057                                                                                        | 1434447_at   | 1.86 | 0.01 |
| <i>Cspg2</i>                              | chondroitin sulfate proteoglycan 2                                                                                 | 1427256_at   | 1.86 | 0.00 |
| <i>6430537K16Rik</i>                      | RIKEN cDNA 6430537K16 gene                                                                                         | 1438878_at   | 1.86 | 0.00 |
| <i>Usp3</i>                               | ubiquitin specific peptidase 3                                                                                     | 1425022_at   | 1.86 | 0.00 |
| <i>Gba</i>                                | glucosidase, beta, acid                                                                                            | 1437044_a_at | 1.86 | 0.00 |
| <i>Psmc7</i>                              | proteasome (prosome, macropain) subunit, alpha type 7                                                              | 1423568_at   | 1.86 | 0.00 |
| <i>H3f3b</i>                              | H3 histone, family 3B                                                                                              | 1455725_a_at | 1.86 | 0.01 |
| ---                                       | ---                                                                                                                | 1426910_at   | 1.86 | 0.00 |
| <i>Hpse</i>                               | Heparanase                                                                                                         | 1433930_at   | 1.86 | 0.00 |
| <i>Ppa1</i>                               | pyrophosphatase (inorganic) 1                                                                                      | 1416939_at   | 1.85 | 0.00 |
| <i>Mar-01</i>                             | membrane-associated ring finger (C3HC4) 1                                                                          | 1440209_at   | 1.85 | 0.00 |
| <i>Zbtb16</i>                             | zinc finger and BTB domain containing 16                                                                           | 1419874_x_at | 1.85 | 0.02 |
| <i>Ss18l1</i>                             | Synovial sarcoma translocation gene on chromosome 18-like 1                                                        | 1458785_at   | 1.85 | 0.02 |
| <i>D030070L09Rik</i>                      | RIKEN cDNA D030070L09 gene                                                                                         | 1433859_at   | 1.85 | 0.00 |
| <i>Ereg</i>                               | epiregulin                                                                                                         | 1419431_at   | 1.85 | 0.00 |
| <i>Psmc4</i>                              | proteasome (prosome, macropain) 26S subunit, non-ATPase, 4                                                         | 1425859_a_at | 1.85 | 0.00 |
| <i>Grn</i>                                | granulin                                                                                                           | 1456567_x_at | 1.85 | 0.00 |
| <i>3110024A21Rik</i>                      | RIKEN cDNA 3110024A21 gene                                                                                         | 1447703_x_at | 1.85 | 0.00 |
| <i>Ninj1</i>                              | ninjurin 1                                                                                                         | 1438928_x_at | 1.85 | 0.00 |
| <i>Jak2</i>                               | Janus kinase 2                                                                                                     | 1421066_at   | 1.85 | 0.00 |
| <i>Sfxn1</i>                              | sideroflexin 1                                                                                                     | 1417559_at   | 1.85 | 0.01 |
| <i>Fem1c</i>                              | fem-1 homolog C (C.elegans)                                                                                        | 1438075_at   | 1.84 | 0.10 |
| <i>Ets2</i>                               | E26 avian leukemia oncogene 2, 3' domain                                                                           | 1416268_at   | 1.84 | 0.00 |
| <i>Rab711</i>                             | RAB7, member RAS oncogene family-like 1                                                                            | 1451362_at   | 1.84 | 0.00 |
| <i>Zbtb16</i>                             | zinc finger and BTB domain containing 16                                                                           | 1439163_at   | 1.84 | 0.03 |
| <i>Ninj1</i>                              | ninjurin 1                                                                                                         | 1448417_at   | 1.84 | 0.00 |
| <i>Ank3</i>                               | ankyrin 3, epithelial                                                                                              | 1425202_a_at | 1.84 | 0.00 |
| <i>St6galnac4</i>                         | ST6 (alpha-N-acetyl-neuraminyl-2,3-beta-galactosyl-1,3)-N-acetylgalactosaminide alpha-2,6-sialyltransferase 4      | 1418075_at   | 1.84 | 0.00 |
| <i>Tgfr2</i>                              | transforming growth factor, beta receptor II                                                                       | 1425444_a_at | 1.84 | 0.00 |
| <i>Gna13</i>                              | guanine nucleotide binding protein, alpha 13                                                                       | 1450656_at   | 1.84 | 0.02 |
| <i>Nadk</i>                               | NAD kinase                                                                                                         | 1416248_at   | 1.84 | 0.00 |
| ---                                       | ---                                                                                                                | 1435361_at   | 1.84 | 0.01 |
| <i>Midn</i>                               | midnolin                                                                                                           | 1449188_at   | 1.84 | 0.00 |
| <i>Snrpa1</i>                             | small nuclear ribonucleoprotein polypeptide A'                                                                     | 1417351_a_at | 1.84 | 0.00 |
| <i>Numa1</i>                              | Nuclear mitotic apparatus protein 1                                                                                | 1441090_at   | 1.84 | 0.01 |
| <i>Rbed1</i>                              | RNA binding motif and ELMO domain 1                                                                                | 1451392_at   | 1.84 | 0.00 |
| <i>Steap1</i>                             | six transmembrane epithelial antigen of the prostate 1                                                             | 1424938_at   | 1.84 | 0.02 |
| <i>Tmem50a</i>                            | transmembrane protein 50A                                                                                          | 1453155_at   | 1.84 | 0.00 |
| <i>Cndp2</i>                              | CNDP dipeptidase 2 (metallopeptidase M20 family)                                                                   | 1460177_at   | 1.84 | 0.00 |
| <i>U2af1-rs2</i>                          | U2 small nuclear ribonucleoprotein auxiliary factor (U2AF) 1, related sequence 2                                   | 1455727_at   | 1.84 | 0.00 |
| <i>Clec1a</i>                             | C-type lectin domain family 1, member a                                                                            | 1460039_at   | 1.84 | 0.01 |
| <i>Snap29</i>                             | synaptosomal-associated protein                                                                                    | 1423355_at   | 1.84 | 0.00 |
| <i>Syk</i>                                | spleen tyrosine kinase                                                                                             | 1418262_at   | 1.84 | 0.00 |
| <i>Pglyrp1</i>                            | peptidoglycan recognition protein 1                                                                                | 1449184_at   | 1.83 | 0.00 |
| <i>Bclaf1</i>                             | BCL2-associated transcription factor 1                                                                             | 1428844_a_at | 1.83 | 0.00 |
| <i>Tsc22d1</i>                            | TSC22 domain family, member 1                                                                                      | 1433899_x_at | 1.83 | 0.00 |
| <i>Ggps1</i>                              | geranylgeranyl diphosphate synthase 1                                                                              | 1419505_a_at | 1.83 | 0.00 |
| <i>Tnfrsf10</i>                           | tumor necrosis factor (ligand) superfamily, member 10                                                              | 1439680_at   | 1.83 | 0.00 |
| <i>Ripk2</i>                              | receptor (TNFRSF)-interacting serine-threonine kinase 2                                                            | 1450173_at   | 1.83 | 0.00 |
| ---                                       | ---                                                                                                                | 1437916_at   | 1.83 | 0.00 |
| <i>Tsr1</i>                               | TSR1, 20S rRNA accumulation, homolog (yeast)                                                                       | 1433502_s_at | 1.83 | 0.00 |
| <i>Trim34</i>                             | tripartite motif protein 34                                                                                        | 1426093_at   | 1.83 | 0.00 |
| <i>Eif1</i>                               | eukaryotic translation termination factor 1                                                                        | 1451208_at   | 1.83 | 0.00 |
| <i>Kif22</i>                              | kinesin family member 22                                                                                           | 1437716_x_at | 1.83 | 0.00 |
| <i>Nubp1</i>                              | nucleotide binding protein 1                                                                                       | 1418906_at   | 1.83 | 0.00 |
| <i>Gtppb4</i>                             | GTP binding protein 4                                                                                              | 1423143_at   | 1.82 | 0.00 |
| <i>Rbm18</i>                              | RNA binding motif protein 18                                                                                       | 1420608_at   | 1.82 | 0.02 |
| <i>Gsr</i>                                | glutathione reductase 1                                                                                            | 1421817_at   | 1.82 | 0.00 |
| <i>Cttm</i>                               | cortactin                                                                                                          | 1423917_a_at | 1.82 | 0.00 |
| <i>LOC433237</i>                          | hypothetical gene supported by AK028012                                                                            | 1444178_at   | 1.82 | 0.04 |
| <i>Rlf</i>                                | Rearranged L-myc fusion sequence                                                                                   | 1440020_at   | 1.82 | 0.00 |
| <i>Sdad1</i>                              | SDA1 domain containing 1                                                                                           | 1452454_at   | 1.82 | 0.00 |
| <i>Ftsj3</i>                              | FtsJ homolog 3 (E. coli)                                                                                           | 1451026_at   | 1.82 | 0.00 |
| <i>Mmd</i> /// <i>LOC676546</i>           | monocyte to macrophage differentiation-associated /// similar to monocyte to macrophage differentiation-associated | 1435645_at   | 1.82 | 0.00 |
| <i>Pold4</i>                              | polymerase (DNA-directed), delta 4                                                                                 | 1427885_at   | 1.82 | 0.00 |
| <i>Ucgg</i>                               | UDP-glucose ceramide glucosyltransferase                                                                           | 1421268_at   | 1.82 | 0.02 |
| <i>A1413194</i>                           | expressed sequence A1413194                                                                                        | 1441320_a_at | 1.82 | 0.00 |
| <i>Bin3</i>                               | bridging integrator 3                                                                                              | 1417691_at   | 1.82 | 0.00 |
| <i>Hivp3</i>                              | human immunodeficiency virus type 1 enhancer binding protein 3                                                     | 1458802_at   | 1.82 | 0.00 |
| <i>Cpne8</i>                              | copine VIII                                                                                                        | 1431146_a_at | 1.82 | 0.02 |
| <i>Flot2</i>                              | flotillin 2                                                                                                        | 1417544_a_at | 1.82 | 0.00 |
| <i>2400006N03Rik</i>                      | RIKEN cDNA 2400006N03 gene                                                                                         | 1428828_at   | 1.82 | 0.00 |
| <i>Plod3</i>                              | procollagen-lysine, 2-oxoglutarate 5-dioxygenase 3                                                                 | 1415901_at   | 1.82 | 0.00 |
| <i>Dnttip2</i>                            | deoxynucleotidyltransferase, terminal, interacting protein 2                                                       | 1427881_at   | 1.82 | 0.00 |
| ---                                       | ---                                                                                                                | 1458980_at   | 1.81 | 0.00 |
| <i>1700047117Rik</i> /// <i>LOC665155</i> | RIKEN cDNA 1700047117 gene /// similar to signal recognition particle 54                                           | 1460466_at   | 1.81 | 0.00 |
| <i>Serpine2</i>                           | serine (or cysteine) peptidase inhibitor, clade E, member 2                                                        | 1416666_at   | 1.81 | 0.00 |
| <i>4930504E06Rik</i>                      | RIKEN cDNA 4930504E06 gene                                                                                         | 1438321_x_at | 1.81 | 0.00 |
| <i>Mybbp1a</i>                            | MYB binding protein (P160) 1a                                                                                      | 1423430_at   | 1.81 | 0.00 |
| <i>Dpysl3</i>                             | dihydropyrimidinase-like 3                                                                                         | 1438789_s_at | 1.81 | 0.00 |
| <i>2310044G17Rik</i>                      | RIKEN cDNA 2310044G17 gene                                                                                         | 1424913_at   | 1.81 | 0.00 |
| <i>D13Wsu177e</i>                         | DNA segment, Chr 13, Wayne State University 177, expressed                                                         | 1424620_at   | 1.81 | 0.00 |
| <i>Cttm</i>                               | cortactin                                                                                                          | 1433908_a_at | 1.81 | 0.00 |
| <i>Ogfr11</i> /// <i>LOC673882</i>        | opioid growth factor receptor-like 1 /// similar to opioid growth factor receptor-like 1                           | 1424414_at   | 1.81 | 0.00 |
| <i>Josd3</i>                              | Josephin domain containing 3                                                                                       | 1430271_x_at | 1.81 | 0.01 |
| <i>Osr1</i>                               | odd-skipped related 1 (Drosophila)                                                                                 | 1449350_at   | 1.81 | 0.02 |
| <i>Tbc1d15</i>                            | TBC1 domain family, member 15                                                                                      | 1416062_at   | 1.80 | 0.07 |
| <i>Tmem23</i>                             | Transmembrane protein 23                                                                                           | 1457968_at   | 1.80 | 0.11 |
| <i>Scarb2</i>                             | scavenger receptor class B, member 2                                                                               | 1454704_at   | 1.80 | 0.00 |
| <i>Baiaip2</i>                            | brain-specific angiogenesis inhibitor 1-associated protein 2                                                       | 1425656_a_at | 1.80 | 0.00 |

|                                          |                                                                                                                                                                                                                                                                                                                                                             |              |      |      |
|------------------------------------------|-------------------------------------------------------------------------------------------------------------------------------------------------------------------------------------------------------------------------------------------------------------------------------------------------------------------------------------------------------------|--------------|------|------|
| <i>Ctsz</i>                              | cathepsin Z                                                                                                                                                                                                                                                                                                                                                 | 1417868 a at | 1.80 | 0.00 |
| <i>Usp54</i>                             | ubiquitin specific peptidase 54                                                                                                                                                                                                                                                                                                                             | 1428731 at   | 1.80 | 0.00 |
| <i>Casp8</i>                             | caspase 8                                                                                                                                                                                                                                                                                                                                                   | 1424552 at   | 1.80 | 0.00 |
| <i>Spes3</i>                             | signal peptidase complex subunit 3 homolog (S. cerevisiae)                                                                                                                                                                                                                                                                                                  | 1451175 at   | 1.80 | 0.00 |
| <i>Ctsz</i>                              | cathepsin Z                                                                                                                                                                                                                                                                                                                                                 | 1417870 x at | 1.80 | 0.00 |
| <i>Tnrc9</i>                             | trinucleotide repeat containing 9                                                                                                                                                                                                                                                                                                                           | 1436600 at   | 1.80 | 0.04 |
| <i>Csf2rb2</i>                           | colony stimulating factor 2 receptor, beta 2, low-affinity (granulocyte-macrophage)                                                                                                                                                                                                                                                                         | 1449360 at   | 1.80 | 0.00 |
| <i>Paox</i>                              | polyamine oxidase (exo-N4-amino)                                                                                                                                                                                                                                                                                                                            | 1428859 at   | 1.80 | 0.00 |
| <i>Ets2</i>                              | E26 avian leukemia oncogene 2, 3' domain                                                                                                                                                                                                                                                                                                                    | 1447685 x at | 1.80 | 0.00 |
| <i>Mtmr1</i>                             | myotubularin related protein 1                                                                                                                                                                                                                                                                                                                              | 1421879 at   | 1.80 | 0.02 |
| <i>Fbxw17</i>                            | F-box and WD-40 domain protein 17                                                                                                                                                                                                                                                                                                                           | 1434991 at   | 1.80 | 0.00 |
| <i>Atf6</i>                              | activating transcription factor 6                                                                                                                                                                                                                                                                                                                           | 1453288 at   | 1.80 | 0.00 |
| <i>Steap2</i>                            | six transmembrane epithelial antigen of prostate 2                                                                                                                                                                                                                                                                                                          | 1438773 at   | 1.79 | 0.02 |
| <i>Gas5</i>                              | growth arrest specific 5                                                                                                                                                                                                                                                                                                                                    | 1424843 a at | 1.79 | 0.02 |
| <i>Usp3</i>                              | ubiquitin specific peptidase 3                                                                                                                                                                                                                                                                                                                              | 1425023 at   | 1.79 | 0.00 |
| <i>Rfxank</i>                            | regulatory factor X-associated ankyrin-containing protein                                                                                                                                                                                                                                                                                                   | 1455371 at   | 1.79 | 0.00 |
| ---                                      | ---                                                                                                                                                                                                                                                                                                                                                         | 1452719 at   | 1.79 | 0.00 |
| <i>Dnajb4</i>                            | DnaJ (Hsp40) homolog, subfamily B, member 4                                                                                                                                                                                                                                                                                                                 | 1451177 at   | 1.79 | 0.00 |
| <i>Tpd52</i>                             | tumor protein D52                                                                                                                                                                                                                                                                                                                                           | 1419494 a at | 1.79 | 0.03 |
| <i>Fbxl5</i>                             | F-box and leucine-rich repeat protein 5                                                                                                                                                                                                                                                                                                                     | 1456223 at   | 1.79 | 0.00 |
| <i>Tsc22d1</i>                           | TSC22 domain family, member 1                                                                                                                                                                                                                                                                                                                               | 1425742 a at | 1.79 | 0.01 |
| <i>Cd33</i>                              | CD33 antigen                                                                                                                                                                                                                                                                                                                                                | 1450513 at   | 1.78 | 0.00 |
| <i>Mif1</i>                              | metal response element binding transcription factor 1                                                                                                                                                                                                                                                                                                       | 1429170 a at | 1.78 | 0.00 |
| <i>B4gal1</i>                            | UDP-Gal:betaGlcNAc beta 1,4- galactosyltransferase, polypeptide 1                                                                                                                                                                                                                                                                                           | 1458773 at   | 1.78 | 0.14 |
| <i>Hap1</i>                              | huntingtin-associated protein 1                                                                                                                                                                                                                                                                                                                             | 1416997 a at | 1.78 | 0.00 |
| <i>Atxn10</i>                            | ataxin 10                                                                                                                                                                                                                                                                                                                                                   | 1422576 at   | 1.78 | 0.00 |
| <i>Mtdh</i>                              | Metadherin                                                                                                                                                                                                                                                                                                                                                  | 1434882 at   | 1.78 | 0.00 |
| <i>Ypel5</i>                             | yippee-like 5 (Drosophila)                                                                                                                                                                                                                                                                                                                                  | 1433593 at   | 1.78 | 0.02 |
| <i>Map1lc3b</i>                          | microtubule-associated protein 1 light chain 3 beta                                                                                                                                                                                                                                                                                                         | 1415928 a at | 1.78 | 0.00 |
| <i>Cd40</i>                              | CD40 antigen                                                                                                                                                                                                                                                                                                                                                | 1439221 s at | 1.78 | 0.00 |
| <i>Edg1</i>                              | endothelial differentiation sphingolipid G-protein-coupled receptor 1                                                                                                                                                                                                                                                                                       | 1423571 at   | 1.78 | 0.02 |
| <i>Ptpn2</i>                             | protein tyrosine phosphatase, non-receptor type 2                                                                                                                                                                                                                                                                                                           | 1425197 at   | 1.78 | 0.10 |
| <i>Star</i>                              | steroidogenic acute regulatory protein                                                                                                                                                                                                                                                                                                                      | 1418728 at   | 1.78 | 0.05 |
| <i>Mtmr1</i>                             | myotubularin related protein 1                                                                                                                                                                                                                                                                                                                              | 1421880 at   | 1.78 | 0.01 |
| <i>Ctnbp2nl</i>                          | CTTNBP2 N-terminal like                                                                                                                                                                                                                                                                                                                                     | 1449300 at   | 1.78 | 0.00 |
| <i>Txn1</i>                              | thioredoxin 1                                                                                                                                                                                                                                                                                                                                               | 1416119 at   | 1.78 | 0.00 |
| <i>Hpxn</i>                              | hemopexin                                                                                                                                                                                                                                                                                                                                                   | 1423944 at   | 1.78 | 0.00 |
| <i>5033413D16Rik</i>                     | RIKEN cDNA 5033413D16 gene                                                                                                                                                                                                                                                                                                                                  | 1428694 at   | 1.78 | 0.02 |
| <i>Prss23</i>                            | protease, serine, 23                                                                                                                                                                                                                                                                                                                                        | 1431057 a at | 1.77 | 0.08 |
| <i>H6pd</i>                              | hexose-6-phosphate dehydrogenase (glucose 1-dehydrogenase)                                                                                                                                                                                                                                                                                                  | 1452145 at   | 1.77 | 0.00 |
| <i>Hspa2</i>                             | heat shock protein 2                                                                                                                                                                                                                                                                                                                                        | 1417101 at   | 1.77 | 0.04 |
| <i>Gpr84</i>                             | G protein-coupled receptor 84                                                                                                                                                                                                                                                                                                                               | 1420591 at   | 1.77 | 0.00 |
| <i>Ath1</i>                              | ATH1, acid trehalase-like 1 (yeast)                                                                                                                                                                                                                                                                                                                         | 1423765 at   | 1.77 | 0.00 |
| <i>Hmga1</i>                             | high mobility group AT-hook 1                                                                                                                                                                                                                                                                                                                               | 1416184 s at | 1.77 | 0.00 |
| <i>Psm11</i> /// LOC627316 /// LOC671671 | proteasome (prosome, macropain) 26S subunit, non-ATPase, 11 /// similar to 26S proteasome non-ATPase regulatory subunit 11 (26S proteasome regulatory subunit S9) (26S proteasome regulatory subunit p44.5) /// similar to 26S proteasome non-ATPase regulatory subunit 11 (26S proteasome regulatory subunit S9) (26S proteasome regulatory subunit p44.5) | 1437080_s_at | 1.77 | 0.00 |
| <i>Rps25</i>                             | ribosomal protein S25                                                                                                                                                                                                                                                                                                                                       | 1430978 at   | 1.77 | 0.00 |
| <i>Chst11</i>                            | carbohydrate sulfotransferase 11                                                                                                                                                                                                                                                                                                                            | 1428902 at   | 1.77 | 0.02 |
| <i>Ddx54</i>                             | DEAD (Asp-Glu-Ala-Asp) box polypeptide 54                                                                                                                                                                                                                                                                                                                   | 1460396 at   | 1.77 | 0.00 |
| <i>Pacrg</i>                             | Park2 co-regulated                                                                                                                                                                                                                                                                                                                                          | 1428751 at   | 1.77 | 0.00 |
| <i>Klf6</i>                              | Kruppel-like factor 6                                                                                                                                                                                                                                                                                                                                       | 1433508 at   | 1.77 | 0.02 |
| <i>Sfns7</i>                             | splicing factor, arginine/serine-rich 7                                                                                                                                                                                                                                                                                                                     | 1436871 at   | 1.77 | 0.03 |
| <i>Xpa</i>                               | xeroderma pigmentosum, complementation group A                                                                                                                                                                                                                                                                                                              | 1460725 at   | 1.77 | 0.00 |
| <i>Sec1</i>                              | secretory blood group 1                                                                                                                                                                                                                                                                                                                                     | 1455784 at   | 1.77 | 0.02 |
| <i>Cpeb1</i>                             | cytoplasmic polyadenylation element binding protein 1                                                                                                                                                                                                                                                                                                       | 1417960 at   | 1.77 | 0.00 |
| <i>H3f3b</i>                             | H3 histone, family 3B                                                                                                                                                                                                                                                                                                                                       | 1420376 a at | 1.76 | 0.04 |
| <i>Orm1</i>                              | orosomucoid 1                                                                                                                                                                                                                                                                                                                                               | 1451054 at   | 1.76 | 0.01 |
| <i>Egfr</i>                              | epidermal growth factor receptor                                                                                                                                                                                                                                                                                                                            | 1435888 at   | 1.76 | 0.02 |
| ---                                      | ---                                                                                                                                                                                                                                                                                                                                                         | 1447122 at   | 1.76 | 0.00 |
| <i>Rnf122</i>                            | ring finger protein 122                                                                                                                                                                                                                                                                                                                                     | 1454857 at   | 1.76 | 0.02 |
| <i>Sec61a1</i>                           | Sec61 alpha 1 subunit (S. cerevisiae)                                                                                                                                                                                                                                                                                                                       | 1416189 a at | 1.76 | 0.00 |
| <i>Samsn1</i>                            | SAM domain, SH3 domain and nuclear localization signals, 1                                                                                                                                                                                                                                                                                                  | 1421457 a at | 1.76 | 0.00 |
| <i>BC031353</i>                          | cDNA sequence BC031353                                                                                                                                                                                                                                                                                                                                      | 1436033 at   | 1.76 | 0.00 |
| <i>1810011O16Rik</i>                     | RIKEN cDNA 1810011O16 gene                                                                                                                                                                                                                                                                                                                                  | 1432444 a at | 1.76 | 0.00 |
| <i>C130047D21Rik</i>                     | RIKEN cDNA C130047D21 gene                                                                                                                                                                                                                                                                                                                                  | 1439293 at   | 1.76 | 0.00 |
| <i>Xbp1</i>                              | X-box binding protein 1                                                                                                                                                                                                                                                                                                                                     | 1420886 a at | 1.76 | 0.00 |
| <i>Slc7a6</i>                            | solute carrier family 7 (cationic amino acid transporter, y+ system), member 6                                                                                                                                                                                                                                                                              | 1433467 at   | 1.75 | 0.00 |
| <i>Trim34</i>                            | Tripartite motif protein 34                                                                                                                                                                                                                                                                                                                                 | 1446939 at   | 1.75 | 0.04 |
| <i>Clic1</i>                             | chloride intracellular channel 1                                                                                                                                                                                                                                                                                                                            | 1416656 at   | 1.75 | 0.00 |
| <i>Psm10</i>                             | proteasome (prosome, macropain) 26S subunit, non-ATPase, 10                                                                                                                                                                                                                                                                                                 | 1436559 a at | 1.75 | 0.00 |
| <i>Ctdsp2</i>                            | CTD (carboxy-terminal domain, RNA polymerase II, polypeptide A) small phosphatase 2                                                                                                                                                                                                                                                                         | 1423661 s at | 1.75 | 0.00 |
| <i>Clic5</i>                             | chloride intracellular channel 5                                                                                                                                                                                                                                                                                                                            | 1439505 at   | 1.75 | 0.01 |
| <i>Acp2</i>                              | acid phosphatase 2, lysosomal                                                                                                                                                                                                                                                                                                                               | 1424655 at   | 1.75 | 0.00 |
| ---                                      | ---                                                                                                                                                                                                                                                                                                                                                         | 1457438 at   | 1.75 | 0.00 |
| <i>Rnh1</i>                              | ribonuclease/angiogenin inhibitor 1                                                                                                                                                                                                                                                                                                                         | 1451201 s at | 1.75 | 0.00 |
| <i>Ggps1</i>                             | geranylgeranyl diphosphate synthase 1                                                                                                                                                                                                                                                                                                                       | 1419805 s at | 1.75 | 0.01 |
| <i>Eif4a1</i>                            | eukaryotic translation initiation factor 4A1                                                                                                                                                                                                                                                                                                                | 1434985 a at | 1.75 | 0.00 |
| <i>Tlr13</i>                             | toll-like receptor 13                                                                                                                                                                                                                                                                                                                                       | 1457753 at   | 1.75 | 0.03 |
| <i>Dsg2</i>                              | desmoglein 2                                                                                                                                                                                                                                                                                                                                                | 1425619 s at | 1.75 | 0.01 |
| <i>Tuba6</i> /// LOC626534               | tubulin, alpha 6 /// similar to Tubulin alpha-6 chain (Alpha-tubulin 6)                                                                                                                                                                                                                                                                                     | 1416128 at   | 1.75 | 0.00 |
| <i>1110033J19Rik</i>                     | RIKEN cDNA 1110033J19 gene                                                                                                                                                                                                                                                                                                                                  | 1452730 at   | 1.75 | 0.02 |
| <i>D10Erd438e</i>                        | DNA segment, Chr 10, ERATO Doi 438, expressed                                                                                                                                                                                                                                                                                                               | 1420646 at   | 1.74 | 0.02 |
| <i>Wdr68</i>                             | WD repeat domain 68                                                                                                                                                                                                                                                                                                                                         | 1429385 at   | 1.74 | 0.00 |
| <i>Ddx54</i>                             | DEAD (Asp-Glu-Ala-Asp) box polypeptide 54                                                                                                                                                                                                                                                                                                                   | 1438853 x at | 1.74 | 0.00 |
| <i>Il13ra1</i>                           | interleukin 13 receptor, alpha 1                                                                                                                                                                                                                                                                                                                            | 1454783 at   | 1.74 | 0.04 |
| <i>Zfp259</i>                            | zinc finger protein 259                                                                                                                                                                                                                                                                                                                                     | 1419281 a at | 1.74 | 0.00 |
| <i>Nr1h2</i>                             | nuclear receptor subfamily 1, group H, member 2                                                                                                                                                                                                                                                                                                             | 1416353 at   | 1.74 | 0.00 |
| <i>Fbxo4</i>                             | F-box only protein 4                                                                                                                                                                                                                                                                                                                                        | 1427121 at   | 1.74 | 0.00 |
| <i>Tpie2</i>                             | transmembrane phosphoinositide 3-phosphatase and tensin homolog 2                                                                                                                                                                                                                                                                                           | 1418097 a at | 1.74 | 0.00 |
| <i>Galnt2</i>                            | UDP-N-acetyl-alpha-D-galactosamine:polypeptide N-acetylgalactosaminyltransferase-like 2                                                                                                                                                                                                                                                                     | 1429236_at   | 1.74 | 0.00 |
| <i>Hip1</i>                              | huntingtin interacting protein 1                                                                                                                                                                                                                                                                                                                            | 1434557 at   | 1.74 | 0.00 |
| <i>Creb3l1</i>                           | cAMP responsive element binding protein 3-like 1                                                                                                                                                                                                                                                                                                            | 1419295 at   | 1.74 | 0.00 |
| <i>Abhd4</i>                             | abhydrolase domain containing 4                                                                                                                                                                                                                                                                                                                             | 1439259 x at | 1.74 | 0.00 |

|                                  |                                                                                          |         |      |      |      |
|----------------------------------|------------------------------------------------------------------------------------------|---------|------|------|------|
| <i>Cd53</i>                      | CD53 antigen                                                                             | 1448617 | at   | 1.74 | 0.00 |
| <i>Cyld</i>                      | cylindromatosis (turban tumor syndrome)                                                  | 1429617 | at   | 1.74 | 0.02 |
| <i>Ralb</i>                      | v-ral simian leukemia viral oncogene homolog B (ras related)                             | 1435517 | x at | 1.74 | 0.00 |
| <i>Fmnl2</i>                     | Formin-like 2                                                                            | 1457910 | at   | 1.73 | 0.01 |
| <i>Ninj1</i>                     | ninjurin 1                                                                               | 1441281 | s at | 1.73 | 0.00 |
| <i>Clu</i>                       | clusterin                                                                                | 1437689 | x at | 1.73 | 0.00 |
| <i>Armcx5</i>                    | armadillo repeat containing, X-linked 5                                                  | 1424481 | s at | 1.73 | 0.00 |
| <i>Mknk2</i>                     | MAP kinase-interacting serine/threonine kinase 2                                         | 1418300 | a at | 1.73 | 0.00 |
| <i>Itgb1</i>                     | integrin beta 1 (fibronectin receptor beta)                                              | 1427771 | x at | 1.73 | 0.02 |
| <i>BC028799 // 4922501C03Rik</i> | cDNA sequence BC028799 /// RIKEN cDNA 4922501C03 gene                                    | 1443899 | at   | 1.73 | 0.00 |
| <i>Prpf31</i>                    | PRP31 pre-mRNA processing factor 31 homolog (yeast)                                      | 1448633 | at   | 1.73 | 0.00 |
| <i>Creb3</i>                     | cAMP responsive element binding protein 3                                                | 1424740 | at   | 1.73 | 0.01 |
| <i>Gng12</i>                     | guanine nucleotide binding protein (G protein), gamma 12                                 | 1421947 | at   | 1.73 | 0.01 |
| <i>Ric8</i>                      | resistance to inhibitors of cholinesterase 8 homolog (C. elegans)                        | 1424819 | a at | 1.73 | 0.00 |
| <i>Actn1</i>                     | actinin, alpha 1                                                                         | 1428585 | at   | 1.73 | 0.02 |
| <i>Tgoln1</i>                    | trans-golgi network protein                                                              | 1423309 | at   | 1.73 | 0.00 |
| <i>2010003J03Rik</i>             | RIKEN cDNA 2010003J03 gene                                                               | 1428542 | at   | 1.73 | 0.00 |
| <i>Akap2</i>                     | A kinase (PRKA) anchor protein 2                                                         | 1455870 | at   | 1.73 | 0.04 |
| <i>Psm7</i>                      | proteasome (prosome, macropain) subunit, alpha type 7                                    | 1423567 | a at | 1.73 | 0.00 |
| <i>Prss23</i>                    | protease, serine, 23                                                                     | 1437671 | x at | 1.73 | 0.06 |
| <i>Fgr</i>                       | Gardner-Rasheed feline sarcoma viral (Fgr) oncogene homolog                              | 1442804 | at   | 1.73 | 0.00 |
| <i>Psm1</i>                      | proteasome (prosome, macropain) 28 subunit, alpha                                        | 1417056 | at   | 1.73 | 0.00 |
| <i>Hspb1</i>                     | heat shock protein 1                                                                     | 1427853 | a at | 1.73 | 0.00 |
| <i>1300018I05Rik</i>             | RIKEN cDNA 1300018I05 gene                                                               | 1443388 | at   | 1.73 | 0.00 |
| <i>Dtna</i>                      | dystrobrevin alpha                                                                       | 1425292 | at   | 1.72 | 0.03 |
| <i>Nadk</i>                      | NAD kinase                                                                               | 1416249 | at   | 1.72 | 0.00 |
| <i>Ccdc86</i>                    | coiled-coil domain containing 86                                                         | 1454197 | a at | 1.72 | 0.00 |
| <i>4932414K18Rik</i>             | RIKEN cDNA 4932414K18 gene                                                               | 1454730 | at   | 1.72 | 0.00 |
| ---                              | ---                                                                                      | 1440253 | at   | 1.72 | 0.00 |
| <i>Ifrd1</i>                     | interferon-related developmental regulator 1                                             | 1416067 | at   | 1.72 | 0.02 |
| <i>Ptpr</i>                      | protein tyrosine phosphatase, receptor type, E                                           | 1418540 | a at | 1.72 | 0.01 |
| <i>Smpd3b</i>                    | sphingomyelin phosphodiesterase, acid-like 3B                                            | 1417300 | at   | 1.72 | 0.00 |
| <i>Ints12</i>                    | integrator complex subunit 12                                                            | 1452316 | at   | 1.72 | 0.00 |
| <i>Noc4</i>                      | nucleolar complex associated 4 homolog (S. cerevisiae)                                   | 1423826 | at   | 1.72 | 0.00 |
| <i>Psm8</i>                      | proteasome (prosome, macropain) subunit, beta type 8 (large multifunctional peptidase 7) | 1444619 | x at | 1.72 | 0.00 |
| <i>Klf6</i>                      | Kruppel-like factor 6                                                                    | 1447448 | s at | 1.72 | 0.01 |
| <i>Col4a1</i>                    | procollagen, type IV, alpha 1                                                            | 1452035 | at   | 1.72 | 0.01 |
| <i>Hgs</i>                       | HGF-regulated tyrosine kinase substrate                                                  | 1416540 | at   | 1.72 | 0.00 |
| ---                              | ---                                                                                      | 1456787 | at   | 1.72 | 0.01 |
| <i>Tsc22d1</i>                   | TSC22 domain family, member 1                                                            | 1454971 | x at | 1.72 | 0.00 |
| <i>Rsc1a1</i>                    | regulatory solute carrier protein, family 1, member 1                                    | 1435536 | at   | 1.72 | 0.00 |
| <i>Crbn</i>                      | cereblon                                                                                 | 1423095 | s at | 1.72 | 0.00 |
| <i>Pex12</i>                     | peroxisomal biogenesis factor 12                                                         | 1416259 | at   | 1.72 | 0.00 |
| <i>Spon1</i>                     | spondin 1, (F-spondin) extracellular matrix protein                                      | 1424415 | s at | 1.72 | 0.00 |
| <i>Anxa7</i>                     | annexin A7                                                                               | 1438764 | at   | 1.72 | 0.00 |
| <i>Eif4e3</i>                    | eukaryotic translation initiation factor 4E member 3                                     | 1417977 | at   | 1.72 | 0.00 |
| <i>Ahcy</i>                      | S-adenosylhomocysteine hydrolase                                                         | 1417125 | at   | 1.71 | 0.00 |
| <i>Ypel3</i>                     | yippee-like 3 (Drosophila)                                                               | 1426624 | a at | 1.71 | 0.00 |
| <i>Bzw1</i>                      | basic leucine zipper and W2 domains 1                                                    | 1423040 | at   | 1.71 | 0.02 |
| ---                              | ---                                                                                      | 1430630 | at   | 1.71 | 0.00 |
| <i>1110012M11Rik</i>             | RIKEN cDNA 1110012M11 gene                                                               | 1455895 | x at | 1.71 | 0.00 |
| <i>Ddx27</i>                     | DEAD (Asp-Glu-Ala-Asp) box polypeptide 27                                                | 1424161 | at   | 1.71 | 0.00 |
| <i>Plekhm1</i>                   | pleckstrin homology domain containing, family M (with RUN domain) member 1               | 1454746 | at   | 1.71 | 0.00 |
| <i>Ube2j1</i>                    | ubiquitin-conjugating enzyme E2, J1                                                      | 1448824 | at   | 1.71 | 0.00 |
| <i>Tpd52</i>                     | tumor protein D52                                                                        | 1419493 | a at | 1.71 | 0.00 |
| <i>Isg20l1</i>                   | interferon stimulated exonuclease gene 20-like 1                                         | 1450506 | a at | 1.71 | 0.00 |
| <i>Bicd1</i>                     | bicaudal D homolog 1 (Drosophila)                                                        | 1437548 | at   | 1.71 | 0.07 |
| <i>Rps6ka3</i>                   | ribosomal protein S6 kinase polypeptide 3                                                | 1427299 | at   | 1.71 | 0.00 |
| <i>Cltb</i>                      | clathrin, light polypeptide (Lcb)                                                        | 1453063 | at   | 1.71 | 0.00 |
| <i>Akt3</i>                      | thymoma viral proto-oncogene 3                                                           | 1435879 | at   | 1.71 | 0.03 |
| <i>0610011I04Rik</i>             | RIKEN cDNA 0610011I04 gene                                                               | 1441811 | x at | 1.71 | 0.00 |
| <i>Nek7</i>                      | NIMA (never in mitosis gene a)-related expressed kinase 7                                | 1448474 | at   | 1.70 | 0.00 |
| <i>Tbl1xr1</i>                   | transducin (beta)-like 1X-linked receptor 1                                              | 1455109 | at   | 1.70 | 0.02 |
| <i>Nfil3</i>                     | nuclear factor, interleukin 3, regulated                                                 | 1418932 | at   | 1.70 | 0.05 |
| <i>Xbp1</i>                      | X-box binding protein 1                                                                  | 1420011 | s at | 1.70 | 0.00 |
| <i>Oprs1</i>                     | Opioid receptor, sigma 1                                                                 | 1457324 | at   | 1.70 | 0.00 |
| <i>Ric8</i>                      | resistance to inhibitors of cholinesterase 8 homolog (C. elegans)                        | 1455809 | x at | 1.70 | 0.00 |
| <i>1700023B02Rik</i>             | RIKEN cDNA 1700023B02 gene                                                               | 1423375 | at   | 1.70 | 0.01 |
| <i>Dnajc3</i>                    | Dnaj (Hsp40) homolog, subfamily C, member 3                                              | 1449372 | at   | 1.70 | 0.02 |
| <i>Whdc1</i>                     | WAS protein homology region 2 domain containing 1                                        | 1436792 | at   | 1.70 | 0.00 |
| <i>Ddx58</i>                     | DEAD (Asp-Glu-Ala-Asp) box polypeptide 58                                                | 1446457 | at   | 1.70 | 0.00 |
| <i>Masp1</i>                     | mannan-binding lectin serine peptidase 1                                                 | 1425985 | s at | 1.70 | 0.00 |
| <i>Tubb6</i>                     | tubulin, beta 6                                                                          | 1416431 | at   | 1.70 | 0.02 |
| <i>Nip7</i>                      | nuclear import 7 homolog (S. cerevisiae)                                                 | 1448480 | at   | 1.70 | 0.00 |
| <i>H13</i>                       | histocompatibility 13                                                                    | 1417287 | at   | 1.70 | 0.00 |
| ---                              | ---                                                                                      | 1447851 | x at | 1.70 | 0.00 |
| <i>Ctla4</i>                     | cytotoxic T-lymphocyte-associated protein 4                                              | 1419334 | at   | 1.70 | 0.01 |
| <i>Serinc3</i>                   | serine incorporator 3                                                                    | 1417815 | a at | 1.70 | 0.00 |
| <i>Creld2</i>                    | cysteine-rich with EGF-like domains 2                                                    | 1452754 | at   | 1.70 | 0.00 |
| <i>Nsmce1</i>                    | non-SMC element 1 homolog (S. cerevisiae)                                                | 1436121 | a at | 1.70 | 0.00 |
| <i>Fcgr3</i>                     | Fc receptor, IgG, low affinity III                                                       | 1448620 | at   | 1.70 | 0.00 |
| <i>A1429214</i>                  | expressed sequence A1429214                                                              | 1455199 | at   | 1.70 | 0.00 |
| <i>Cd47</i>                      | CD47 antigen (Rh-related antigen, integrin-associated signal transducer)                 | 1419554 | at   | 1.70 | 0.00 |
| <i>RioK2</i>                     | RIO kinase 2 (yeast)                                                                     | 1423481 | at   | 1.70 | 0.02 |
| <i>9530028C05</i>                | hypothetical protein 9530028C05                                                          | 1436172 | at   | 1.70 | 0.03 |
| <i>Zfand2a</i>                   | zinc finger, AN1-type domain 2A                                                          | 1415940 | at   | 1.70 | 0.00 |
| <i>Cdc42se1</i>                  | CDC42 small effector 1                                                                   | 1428132 | at   | 1.70 | 0.00 |
| <i>Anxa4</i>                     | annexin A4                                                                               | 1457658 | x at | 1.70 | 0.00 |
| <i>Birc3</i>                     | baculoviral IAP repeat-containing 3                                                      | 1425223 | at   | 1.69 | 0.00 |
| <i>Rdh10</i>                     | retinol dehydrogenase 10 (all-trans)                                                     | 1426968 | a at | 1.69 | 0.03 |
| <i>Slc31a2</i>                   | solute carrier family 31, member 2                                                       | 1416654 | at   | 1.69 | 0.00 |
| <i>9130404D14Rik</i>             | RIKEN cDNA 9130404D14 gene                                                               | 1426812 | a at | 1.69 | 0.00 |
| <i>Pfkfb3</i>                    | 6-phosphofructo-2-kinase/fructose-2,6-bisphosphatase 3                                   | 1456676 | a at | 1.69 | 0.02 |
| <i>Psmc4</i>                     | proteasome (prosome, macropain) 26S subunit, ATPase, 4                                   | 1416291 | at   | 1.69 | 0.00 |
| <i>Rhoj</i>                      | ras homolog gene family, member J                                                        | 1418892 | at   | 1.69 | 0.10 |
| <i>Ugcgl1</i>                    | UDP-glucose ceramide glucosyltransferase-like 1                                          | 1455839 | at   | 1.69 | 0.00 |
| <i>Nmt1</i>                      | N-methyltransferase 1                                                                    | 1415683 | at   | 1.69 | 0.00 |

|                                                                                                                                                         |                                                                                                                                                                                                                                                                                                                                                                                                                                                                                                                                                                                               |              |      |      |
|---------------------------------------------------------------------------------------------------------------------------------------------------------|-----------------------------------------------------------------------------------------------------------------------------------------------------------------------------------------------------------------------------------------------------------------------------------------------------------------------------------------------------------------------------------------------------------------------------------------------------------------------------------------------------------------------------------------------------------------------------------------------|--------------|------|------|
| <i>Ccdc86</i>                                                                                                                                           | coiled-coil domain containing 86                                                                                                                                                                                                                                                                                                                                                                                                                                                                                                                                                              | 1452414 s at | 1.69 | 0.00 |
| <i>Ssh3</i>                                                                                                                                             | slingshot homolog 3 (Drosophila)                                                                                                                                                                                                                                                                                                                                                                                                                                                                                                                                                              | 1447929 at   | 1.69 | 0.00 |
| <i>Gpr35</i>                                                                                                                                            | G protein-coupled receptor 35                                                                                                                                                                                                                                                                                                                                                                                                                                                                                                                                                                 | 1449976 a at | 1.69 | 0.00 |
| <i>Thrap2</i>                                                                                                                                           | thyroid hormone receptor associated protein 2                                                                                                                                                                                                                                                                                                                                                                                                                                                                                                                                                 | 1434603 at   | 1.69 | 0.00 |
| <i>D10Wsu52e</i>                                                                                                                                        | DNA segment, Chr 10, Wayne State University 52, expressed                                                                                                                                                                                                                                                                                                                                                                                                                                                                                                                                     | 1423880 at   | 1.69 | 0.00 |
| <i>Gpr56</i>                                                                                                                                            | G protein-coupled receptor 56                                                                                                                                                                                                                                                                                                                                                                                                                                                                                                                                                                 | 1421118 a at | 1.69 | 0.00 |
| <i>Pilrb</i>                                                                                                                                            | paired immunoglobulin-like type 2 receptor beta                                                                                                                                                                                                                                                                                                                                                                                                                                                                                                                                               | 1422041 at   | 1.69 | 0.02 |
| <i>Rnmt</i>                                                                                                                                             | RNA (guanine-7-) methyltransferase                                                                                                                                                                                                                                                                                                                                                                                                                                                                                                                                                            | 1453106 a at | 1.69 | 0.00 |
| <i>Hook3</i>                                                                                                                                            | hook homolog 3 (Drosophila)                                                                                                                                                                                                                                                                                                                                                                                                                                                                                                                                                                   | 1446737 a at | 1.69 | 0.00 |
| <i>Eif4ebp1</i>                                                                                                                                         | eukaryotic translation initiation factor 4E binding protein 1                                                                                                                                                                                                                                                                                                                                                                                                                                                                                                                                 | 1417563 at   | 1.69 | 0.00 |
| <i>Tor1aip2</i>                                                                                                                                         | torsin A interacting protein 2                                                                                                                                                                                                                                                                                                                                                                                                                                                                                                                                                                | 1435526 at   | 1.68 | 0.03 |
| <i>Psm4</i>                                                                                                                                             | proteasome (prosome, macropain) 26S subunit, non-ATPase, 4                                                                                                                                                                                                                                                                                                                                                                                                                                                                                                                                    | 1418874 a at | 1.68 | 0.00 |
| <i>Wdfy1</i>                                                                                                                                            | WD repeat and FYVE domain containing 1                                                                                                                                                                                                                                                                                                                                                                                                                                                                                                                                                        | 1424749 at   | 1.68 | 0.00 |
| <i>Nubp2</i>                                                                                                                                            | nucleotide binding protein 2                                                                                                                                                                                                                                                                                                                                                                                                                                                                                                                                                                  | 1416512 at   | 1.68 | 0.00 |
| <i>Thumpd3</i>                                                                                                                                          | THUMP domain containing 3                                                                                                                                                                                                                                                                                                                                                                                                                                                                                                                                                                     | 1417684 at   | 1.68 | 0.00 |
| <i>Nat2</i>                                                                                                                                             | N-acetyltransferase 2 (arylamine N-acetyltransferase)                                                                                                                                                                                                                                                                                                                                                                                                                                                                                                                                         | 1449981 a at | 1.68 | 0.02 |
| <i>Ankfy1</i>                                                                                                                                           | ankyrin repeat and FYVE domain containing 1                                                                                                                                                                                                                                                                                                                                                                                                                                                                                                                                                   | 1417685 at   | 1.68 | 0.00 |
| <i>Marcks11 /// LOC673071</i>                                                                                                                           | MARCKS-like 1 /// similar to MARCKS-related protein (MARCKS-like protein 1) (Macrophage myristoylated alanine-rich C kinase substrate) (Mac-MARCKS) (MacMARCKS) (Brain protein F52)                                                                                                                                                                                                                                                                                                                                                                                                           | 1435627_x_at | 1.68 | 0.00 |
| <i>Il6st</i>                                                                                                                                            | interleukin 6 signal transducer                                                                                                                                                                                                                                                                                                                                                                                                                                                                                                                                                               | 1437303 at   | 1.68 | 0.02 |
| <i>Atp10d</i>                                                                                                                                           | ATPase, Class V, type 10D                                                                                                                                                                                                                                                                                                                                                                                                                                                                                                                                                                     | 1436544 at   | 1.68 | 0.00 |
| <i>Sumf1</i>                                                                                                                                            | sulfatase modifying factor 1                                                                                                                                                                                                                                                                                                                                                                                                                                                                                                                                                                  | 1424603 at   | 1.68 | 0.00 |
| <i>Scyl3</i>                                                                                                                                            | SCY1-like 3 (S. cerevisiae)                                                                                                                                                                                                                                                                                                                                                                                                                                                                                                                                                                   | 1428918 at   | 1.68 | 0.00 |
| <i>Nras</i>                                                                                                                                             | neuroblastoma ras oncogene                                                                                                                                                                                                                                                                                                                                                                                                                                                                                                                                                                    | 1422688 a at | 1.68 | 0.00 |
| <i>Malat1</i>                                                                                                                                           | metastasis associated lung adenocarcinoma transcript 1 (non-coding RNA)                                                                                                                                                                                                                                                                                                                                                                                                                                                                                                                       | 1436202 at   | 1.68 | 0.04 |
| <i>Map2k3</i>                                                                                                                                           | mitogen activated protein kinase kinase 3                                                                                                                                                                                                                                                                                                                                                                                                                                                                                                                                                     | 1425456 a at | 1.68 | 0.00 |
| <i>Clu</i>                                                                                                                                              | clusterin                                                                                                                                                                                                                                                                                                                                                                                                                                                                                                                                                                                     | 1437458 x at | 1.68 | 0.00 |
| <i>Iga7</i>                                                                                                                                             | integrin alpha 7                                                                                                                                                                                                                                                                                                                                                                                                                                                                                                                                                                              | 1418393 a at | 1.68 | 0.00 |
| <i>Fscn1</i>                                                                                                                                            | fascin homolog 1, actin bundling protein (Strongylocentrotus purpuratus)                                                                                                                                                                                                                                                                                                                                                                                                                                                                                                                      | 1416514 a at | 1.68 | 0.01 |
| <i>9030607L20Rik</i>                                                                                                                                    | RIKEN cDNA 9030607L20 gene                                                                                                                                                                                                                                                                                                                                                                                                                                                                                                                                                                    | 1430103 at   | 1.68 | 0.00 |
| <i>Carhsp1</i>                                                                                                                                          | calcium regulated heat stable protein 1                                                                                                                                                                                                                                                                                                                                                                                                                                                                                                                                                       | 1415975 at   | 1.68 | 0.00 |
| <i>Card14</i>                                                                                                                                           | caspase recruitment domain family, member 14                                                                                                                                                                                                                                                                                                                                                                                                                                                                                                                                                  | 1450142 a at | 1.68 | 0.03 |
| <i>Slc11a2</i>                                                                                                                                          | solute carrier family 11 (proton-coupled divalent metal ion transporters), member 2                                                                                                                                                                                                                                                                                                                                                                                                                                                                                                           | 1452078 a at | 1.67 | 0.00 |
| <i>Trpv4</i>                                                                                                                                            | transient receptor potential cation channel, subfamily V, member 4                                                                                                                                                                                                                                                                                                                                                                                                                                                                                                                            | 1417545 at   | 1.67 | 0.00 |
| <i>Ascc3</i>                                                                                                                                            | activating signal cointegrator 1 complex subunit 3                                                                                                                                                                                                                                                                                                                                                                                                                                                                                                                                            | 1457069 at   | 1.67 | 0.02 |
| <i>Gba</i>                                                                                                                                              | glucosidase, beta, acid                                                                                                                                                                                                                                                                                                                                                                                                                                                                                                                                                                       | 1450099 a at | 1.67 | 0.00 |
| <i>Adams15</i>                                                                                                                                          | a disintegrin-like and metallopeptidase (reprolysin type) with thrombospondin type 1 motif, 15                                                                                                                                                                                                                                                                                                                                                                                                                                                                                                | 1427056_at   | 1.67 | 0.02 |
| <i>Med8</i>                                                                                                                                             | mediator of RNA polymerase II transcription, subunit 8 homolog (yeast)                                                                                                                                                                                                                                                                                                                                                                                                                                                                                                                        | 1431423 a at | 1.67 | 0.00 |
| <i>Hamp2</i>                                                                                                                                            | hepcidin antimicrobial peptide 2                                                                                                                                                                                                                                                                                                                                                                                                                                                                                                                                                              | 1436643 x at | 1.67 | 0.00 |
| <i>Hrbl</i>                                                                                                                                             | HIV-1 Rev binding protein-like                                                                                                                                                                                                                                                                                                                                                                                                                                                                                                                                                                | 1437642 at   | 1.67 | 0.00 |
| <i>Creb3</i>                                                                                                                                            | cAMP responsive element binding protein 3                                                                                                                                                                                                                                                                                                                                                                                                                                                                                                                                                     | 1424741 s at | 1.67 | 0.00 |
| <i>Tmem2</i>                                                                                                                                            | transmembrane protein 2                                                                                                                                                                                                                                                                                                                                                                                                                                                                                                                                                                       | 1424711 at   | 1.67 | 0.02 |
| <i>Timp4</i>                                                                                                                                            | tissue inhibitor of metalloproteinase 4                                                                                                                                                                                                                                                                                                                                                                                                                                                                                                                                                       | 1450974 at   | 1.67 | 0.03 |
| <i>D3Ucla1</i>                                                                                                                                          | DNA segment, Chr 3, University of California at Los Angeles 1                                                                                                                                                                                                                                                                                                                                                                                                                                                                                                                                 | 1415828 a at | 1.67 | 0.00 |
| <i>Ripk1</i>                                                                                                                                            | receptor (TNFRSF)-interacting serine-threonine kinase 1                                                                                                                                                                                                                                                                                                                                                                                                                                                                                                                                       | 1419508 at   | 1.67 | 0.01 |
| <i>Cd40</i>                                                                                                                                             | CD40 antigen                                                                                                                                                                                                                                                                                                                                                                                                                                                                                                                                                                                  | 1449473 s at | 1.67 | 0.00 |
| <i>Elf1</i>                                                                                                                                             | E74-like factor 1                                                                                                                                                                                                                                                                                                                                                                                                                                                                                                                                                                             | 1417540 at   | 1.67 | 0.03 |
| <i>Cxcl14</i>                                                                                                                                           | chemokine (C-X-C motif) ligand 14                                                                                                                                                                                                                                                                                                                                                                                                                                                                                                                                                             | 1418456 a at | 1.67 | 0.00 |
| <i>Sec61a1</i>                                                                                                                                          | Sec61 alpha 1 subunit (S. cerevisiae)                                                                                                                                                                                                                                                                                                                                                                                                                                                                                                                                                         | 1434986 a at | 1.67 | 0.00 |
| ---                                                                                                                                                     | Transcribed locus                                                                                                                                                                                                                                                                                                                                                                                                                                                                                                                                                                             | 1442634 at   | 1.66 | 0.02 |
| <i>Npm1</i>                                                                                                                                             | nucleophosmin 1                                                                                                                                                                                                                                                                                                                                                                                                                                                                                                                                                                               | 1432416 a at | 1.66 | 0.00 |
| <i>Rhobtb1</i>                                                                                                                                          | Rho-related BTB domain containing 1                                                                                                                                                                                                                                                                                                                                                                                                                                                                                                                                                           | 1429206 at   | 1.66 | 0.00 |
| ---                                                                                                                                                     | ---                                                                                                                                                                                                                                                                                                                                                                                                                                                                                                                                                                                           | 1439956 at   | 1.66 | 0.00 |
| <i>C330023M02Rik</i>                                                                                                                                    | RIKEN cDNA C330023M02 gene                                                                                                                                                                                                                                                                                                                                                                                                                                                                                                                                                                    | 1433766 at   | 1.66 | 0.00 |
| <i>Phc2</i>                                                                                                                                             | polyhomeotic-like 2 (Drosophila)                                                                                                                                                                                                                                                                                                                                                                                                                                                                                                                                                              | 1437239 x at | 1.66 | 0.00 |
| <i>Pcqp</i>                                                                                                                                             | positive cofactor 2, multiprotein complex, glutamine/Q-rich-associated protein                                                                                                                                                                                                                                                                                                                                                                                                                                                                                                                | 1448435 at   | 1.66 | 0.00 |
| <i>Sup39h1</i>                                                                                                                                          | suppressor of variegation 3-9 homolog 1 (Drosophila)                                                                                                                                                                                                                                                                                                                                                                                                                                                                                                                                          | 1427382 a at | 1.66 | 0.00 |
| <i>Kars /// LOC631033</i>                                                                                                                               | lysyl-tRNA synthetase /// similar to lysyl-tRNA synthetase                                                                                                                                                                                                                                                                                                                                                                                                                                                                                                                                    | 1416068 at   | 1.66 | 0.00 |
| <i>Snrpa1</i>                                                                                                                                           | small nuclear ribonucleoprotein polypeptide A'                                                                                                                                                                                                                                                                                                                                                                                                                                                                                                                                                | 1417353 x at | 1.66 | 0.00 |
| <i>EfnA5</i>                                                                                                                                            | ephrin A5                                                                                                                                                                                                                                                                                                                                                                                                                                                                                                                                                                                     | 1436866 at   | 1.66 | 0.01 |
| <i>Rit1</i>                                                                                                                                             | Ras-like without CAAX 1                                                                                                                                                                                                                                                                                                                                                                                                                                                                                                                                                                       | 1420540 a at | 1.66 | 0.00 |
| <i>Ubqln1</i>                                                                                                                                           | ubiquilin 1                                                                                                                                                                                                                                                                                                                                                                                                                                                                                                                                                                                   | 1419385 a at | 1.66 | 0.00 |
| <i>Clu</i>                                                                                                                                              | clusterin                                                                                                                                                                                                                                                                                                                                                                                                                                                                                                                                                                                     | 1454849 x at | 1.66 | 0.00 |
| <i>Glul</i>                                                                                                                                             | glutamate-ammonia ligase (glutamine synthetase)                                                                                                                                                                                                                                                                                                                                                                                                                                                                                                                                               | 1426236 a at | 1.66 | 0.00 |
| <i>1110007L15Rik</i>                                                                                                                                    | RIKEN cDNA 1110007L15 gene                                                                                                                                                                                                                                                                                                                                                                                                                                                                                                                                                                    | 1451700 a at | 1.66 | 0.00 |
| <i>RP23-14F5.7</i>                                                                                                                                      | hypothetical gene Rp23-14F5.7                                                                                                                                                                                                                                                                                                                                                                                                                                                                                                                                                                 | 1425728 at   | 1.66 | 0.02 |
| <i>Cotl1</i>                                                                                                                                            | coactosin-like 1 (Dictyostelium)                                                                                                                                                                                                                                                                                                                                                                                                                                                                                                                                                              | 1436838 x at | 1.66 | 0.06 |
| <i>Gna13</i>                                                                                                                                            | guanine nucleotide binding protein, alpha 13                                                                                                                                                                                                                                                                                                                                                                                                                                                                                                                                                  | 1422555 s at | 1.66 | 0.03 |
| <i>4930535B03Rik</i>                                                                                                                                    | RIKEN cDNA 4930535B03 gene                                                                                                                                                                                                                                                                                                                                                                                                                                                                                                                                                                    | 1434817 s at | 1.66 | 0.01 |
| <i>Zfp313</i>                                                                                                                                           | zinc finger protein 313                                                                                                                                                                                                                                                                                                                                                                                                                                                                                                                                                                       | 1455975 x at | 1.66 | 0.00 |
| <i>BB114266</i>                                                                                                                                         | expressed sequence BB114266                                                                                                                                                                                                                                                                                                                                                                                                                                                                                                                                                                   | 1440890 a at | 1.66 | 0.00 |
| <i>6430710C18Rik</i>                                                                                                                                    | RIKEN cDNA 6430710C18 gene                                                                                                                                                                                                                                                                                                                                                                                                                                                                                                                                                                    | 1431559 at   | 1.66 | 0.00 |
| <i>Ddi2</i>                                                                                                                                             | DNA-damage inducible protein 2                                                                                                                                                                                                                                                                                                                                                                                                                                                                                                                                                                | 1429094 at   | 1.66 | 0.14 |
| <i>Tmed5</i>                                                                                                                                            | transmembrane emp24 protein transport domain containing 5                                                                                                                                                                                                                                                                                                                                                                                                                                                                                                                                     | 1424573 at   | 1.66 | 0.02 |
| <i>Rpl3 /// LOC242809 /// LOC433745 /// LOC545864 /// LOC635340 /// LOC668219 /// LOC669672 /// LOC670435 /// LOC670753 /// LOC674810 /// LOC674874</i> | ribosomal protein L3 /// similar to 60S ribosomal protein L3 (J1 protein) /// similar to 60S ribosomal protein L3 (L4) /// similar to 60S ribosomal protein L3 (J1 protein) /// similar to 60S ribosomal protein L3 (L4) /// similar to ribosomal protein L3 isoform b /// similar to 60S ribosomal protein L3 (J1 protein) /// similar to 60S ribosomal protein L3 (J1 protein) /// similar to 60S ribosomal protein L3 (J1 protein) /// similar to 60S ribosomal protein L3 (J1 protein) /// similar to 60S ribosomal protein L3 (J1 protein) /// similar to ribosomal protein L3 isoform b | 1438527_at   | 1.66 | 0.01 |
| <i>Ptpn1</i>                                                                                                                                            | protein tyrosine phosphatase, non-receptor type 1                                                                                                                                                                                                                                                                                                                                                                                                                                                                                                                                             | 1417068 a at | 1.65 | 0.00 |
| <i>D17Wsu104e</i>                                                                                                                                       | DNA segment, Chr 17, Wayne State University 104, expressed                                                                                                                                                                                                                                                                                                                                                                                                                                                                                                                                    | 1448440 x at | 1.65 | 0.00 |
| <i>0610012D09Rik</i>                                                                                                                                    | RIKEN cDNA 0610012D09 gene                                                                                                                                                                                                                                                                                                                                                                                                                                                                                                                                                                    | 1417710 at   | 1.65 | 0.01 |
| <i>Lrrc16</i>                                                                                                                                           | leucine rich repeat containing 16                                                                                                                                                                                                                                                                                                                                                                                                                                                                                                                                                             | 1451804 a at | 1.65 | 0.00 |
| <i>Ifi57</i>                                                                                                                                            | intraflagellar transport 57 homolog (Chlamydomonas)                                                                                                                                                                                                                                                                                                                                                                                                                                                                                                                                           | 1418929 at   | 1.65 | 0.00 |
| <i>Uck2</i>                                                                                                                                             | uridine-cytidine kinase 2                                                                                                                                                                                                                                                                                                                                                                                                                                                                                                                                                                     | 1457980 x at | 1.65 | 0.00 |
| <i>Wdr1</i>                                                                                                                                             | WD and tetraatricopeptide repeats 1                                                                                                                                                                                                                                                                                                                                                                                                                                                                                                                                                           | 1434560 at   | 1.65 | 0.00 |
| <i>Slc25a25</i>                                                                                                                                         | solute carrier family 25 (mitochondrial carrier, phosphate carrier), member 25                                                                                                                                                                                                                                                                                                                                                                                                                                                                                                                | 1424735 at   | 1.65 | 0.02 |
| <i>Psen1</i>                                                                                                                                            | presenilin 1                                                                                                                                                                                                                                                                                                                                                                                                                                                                                                                                                                                  | 1450399 at   | 1.65 | 0.00 |
| <i>Rasl10b</i>                                                                                                                                          | RAS-like, family 10, member B                                                                                                                                                                                                                                                                                                                                                                                                                                                                                                                                                                 | 1433566 at   | 1.65 | 0.00 |
| <i>Limd2 /// LOC632329</i>                                                                                                                              | LIM domain containing 2 /// similar to epithelial protein lost in neoplasm                                                                                                                                                                                                                                                                                                                                                                                                                                                                                                                    | 1456377 x at | 1.65 | 0.04 |
| ---                                                                                                                                                     | ---                                                                                                                                                                                                                                                                                                                                                                                                                                                                                                                                                                                           | 1456209 x at | 1.65 | 0.00 |
| <i>Pmm1</i>                                                                                                                                             | phosphomannomutase 1                                                                                                                                                                                                                                                                                                                                                                                                                                                                                                                                                                          | 1424167 a at | 1.65 | 0.01 |
| <i>Trip4</i>                                                                                                                                            | thyroid hormone receptor interactor 4                                                                                                                                                                                                                                                                                                                                                                                                                                                                                                                                                         | 1422857 at   | 1.65 | 0.00 |
| <i>0610012D09Rik</i>                                                                                                                                    | RIKEN cDNA 0610012D09 gene                                                                                                                                                                                                                                                                                                                                                                                                                                                                                                                                                                    | 1438171 x at | 1.65 | 0.02 |

|                                                                       |                                                                                                                                                                                                                                                                                                                                                                        |              |      |      |
|-----------------------------------------------------------------------|------------------------------------------------------------------------------------------------------------------------------------------------------------------------------------------------------------------------------------------------------------------------------------------------------------------------------------------------------------------------|--------------|------|------|
| <i>Masp1</i>                                                          | mannan-binding lectin serine peptidase 1                                                                                                                                                                                                                                                                                                                               | 1438602 s_at | 1.65 | 0.00 |
| <i>Mmp14</i>                                                          | matrix metalloproteinase 14 (membrane-inserted)                                                                                                                                                                                                                                                                                                                        | 1416572 at   | 1.65 | 0.00 |
| <i>D13Wsu50e</i>                                                      | DNA segment, Chr 13, Wayne State University 50, expressed                                                                                                                                                                                                                                                                                                              | 1448295 at   | 1.65 | 0.00 |
| <i>Ormdl2</i>                                                         | ORM1-like 2 (S. cerevisiae)                                                                                                                                                                                                                                                                                                                                            | 1424235 at   | 1.65 | 0.00 |
| <i>Grb2</i>                                                           | growth factor receptor bound protein 2                                                                                                                                                                                                                                                                                                                                 | 1449111 a_at | 1.64 | 0.00 |
| <i>4632417K18Rik</i>                                                  | RIKEN cDNA 4632417K18 gene                                                                                                                                                                                                                                                                                                                                             | 1422628 at   | 1.64 | 0.02 |
| <i>Plekhe1</i>                                                        | pleckstrin homology domain containing, family G (with RhoGef domain) member 1                                                                                                                                                                                                                                                                                          | 1435363 at   | 1.64 | 0.02 |
| <i>Prr13</i>                                                          | proline rich 13                                                                                                                                                                                                                                                                                                                                                        | 1423686 a_at | 1.64 | 0.00 |
| <i>Hnrpa1</i>                                                         | heterogeneous nuclear ribonucleoprotein A1                                                                                                                                                                                                                                                                                                                             | 1430020 x_at | 1.64 | 0.00 |
| <i>Ifnar2</i>                                                         | interferon (alpha and beta) receptor 2                                                                                                                                                                                                                                                                                                                                 | 1440169 x_at | 1.64 | 0.00 |
| <i>Zc3hav1</i>                                                        | zinc finger CCCH type, antiviral 1                                                                                                                                                                                                                                                                                                                                     | 1428378 at   | 1.64 | 0.00 |
| <i>Rtn4</i>                                                           | reticulon 4                                                                                                                                                                                                                                                                                                                                                            | 1452649 at   | 1.64 | 0.00 |
| <i>9230106B05Rik</i>                                                  | RIKEN cDNA 9230106B05 gene                                                                                                                                                                                                                                                                                                                                             | 1438805 at   | 1.64 | 0.03 |
| <i>Rap1b</i>                                                          | RAS related protein 1b                                                                                                                                                                                                                                                                                                                                                 | 1455349 at   | 1.64 | 0.07 |
| <i>G6pdx</i>                                                          | glucose-6-phosphate dehydrogenase X-linked                                                                                                                                                                                                                                                                                                                             | 1448354 at   | 1.64 | 0.00 |
| <i>Xbp1</i>                                                           | X-box binding protein 1                                                                                                                                                                                                                                                                                                                                                | 1437223 s_at | 1.64 | 0.00 |
| <i>Dhx40</i>                                                          | DEAH (Asp-Glu-Ala-His) box polypeptide 40                                                                                                                                                                                                                                                                                                                              | 1428267 at   | 1.64 | 0.00 |
| <i>Zfyve27</i>                                                        | zinc finger, FYVE domain containing 27                                                                                                                                                                                                                                                                                                                                 | 1424550 at   | 1.64 | 0.00 |
| <i>B230312A22Rik</i>                                                  | RIKEN cDNA B230312A22 gene                                                                                                                                                                                                                                                                                                                                             | 1434059 at   | 1.64 | 0.00 |
| <i>Traf1</i>                                                          | Tnf receptor-associated factor 1                                                                                                                                                                                                                                                                                                                                       | 1445452 at   | 1.64 | 0.00 |
| <i>Pefl</i>                                                           | penta-EF hand domain containing 1                                                                                                                                                                                                                                                                                                                                      | 1448644 at   | 1.64 | 0.00 |
| <i>Ms4a4d</i>                                                         | membrane-spanning 4-domains, subfamily A, member 4D                                                                                                                                                                                                                                                                                                                    | 1418990 at   | 1.64 | 0.02 |
| <i>Uap1</i>                                                           | UDP-N-acetylglucosamine pyrophosphorylase 1                                                                                                                                                                                                                                                                                                                            | 1416745 x_at | 1.64 | 0.02 |
| <i>Parp3</i>                                                          | poly (ADP-ribose) polymerase family, member 3                                                                                                                                                                                                                                                                                                                          | 1445888 x_at | 1.64 | 0.00 |
| <i>Lrp1</i>                                                           | low density lipoprotein receptor-related protein 1                                                                                                                                                                                                                                                                                                                     | 1442849 at   | 1.64 | 0.00 |
| <i>D10Erd438e</i>                                                     | DNA segment, Chr 10, ERATO Doi 438, expressed                                                                                                                                                                                                                                                                                                                          | 1460563 at   | 1.64 | 0.05 |
| <i>Nol5</i>                                                           | nucleolar protein 5                                                                                                                                                                                                                                                                                                                                                    | 1450986 at   | 1.64 | 0.07 |
| <i>Tpbp</i>                                                           | trophoblast glycoprotein                                                                                                                                                                                                                                                                                                                                               | 1423310 at   | 1.64 | 0.00 |
| <i>Armet</i>                                                          | arginine-rich, mutated in early stage tumors                                                                                                                                                                                                                                                                                                                           | 1428112 at   | 1.64 | 0.00 |
| <i>Lrrc8a</i>                                                         | leucine rich repeat containing 8A                                                                                                                                                                                                                                                                                                                                      | 1434694 at   | 1.64 | 0.00 |
| <i>Cp</i>                                                             | ceruloplasmin                                                                                                                                                                                                                                                                                                                                                          | 1417497 at   | 1.63 | 0.00 |
| <i>Heatr1</i>                                                         | HEAT repeat containing 1                                                                                                                                                                                                                                                                                                                                               | 1437965 at   | 1.63 | 0.00 |
| <i>Gcnt2</i>                                                          | glucosaminyl (N-acetyl) transferase 2, 1-branching enzyme                                                                                                                                                                                                                                                                                                              | 1451733 at   | 1.63 | 0.02 |
| <i>Agrap</i>                                                          | angiotensin II type I receptor-associated protein                                                                                                                                                                                                                                                                                                                      | 1422965 at   | 1.63 | 0.00 |
| <i>Fbxo6b</i>                                                         | F-box only protein 6b                                                                                                                                                                                                                                                                                                                                                  | 1417501 at   | 1.63 | 0.00 |
| <i>Ankrd1</i>                                                         | ankyrin repeat domain 1 (cardiac muscle)                                                                                                                                                                                                                                                                                                                               | 1420992 at   | 1.63 | 0.00 |
| <i>Ibrdc2</i>                                                         | IBR domain containing 2                                                                                                                                                                                                                                                                                                                                                | 1439153 at   | 1.63 | 0.00 |
| <i>Hnrpa1</i> /// LOC225307 /// LOC434858 /// LOC654467 /// LOC665646 | heterogeneous nuclear ribonucleoprotein A1 /// heterogeneous nuclear ribonucleoprotein A1 pseudogene /// heterogeneous nuclear ribonucleoprotein A1 pseudogene /// pseudo /// similar to Heterogeneous nuclear ribonucleoprotein A1 (Helix-destabilizing protein) (Single-strand binding protein) (hnRNP core protein A1) (HDP-1) (Topoisomerase-inhibitor suppressed) | 1430019_a_at | 1.63 | 0.00 |
| <i>Slc11a2</i>                                                        | solute carrier family 11 (proton-coupled divalent metal ion transporters), member 2                                                                                                                                                                                                                                                                                    | 1426441 at   | 1.63 | 0.03 |
| <i>Bzw1</i>                                                           | basic leucine zipper and W2 domains 1                                                                                                                                                                                                                                                                                                                                  | 1450845 a_at | 1.63 | 0.02 |
| <i>Wdr32</i>                                                          | WD repeat domain 32                                                                                                                                                                                                                                                                                                                                                    | 1438727 at   | 1.63 | 0.00 |
| <i>Nme1</i>                                                           | expressed in non-metastatic cells 1, protein                                                                                                                                                                                                                                                                                                                           | 1424110 a_at | 1.63 | 0.02 |
| <i>Bac1a</i>                                                          | bromodomain adjacent to zinc finger domain 1A                                                                                                                                                                                                                                                                                                                          | 1433599 at   | 1.63 | 0.00 |
| <i>Tegt</i>                                                           | testis enhanced gene transcript                                                                                                                                                                                                                                                                                                                                        | 1451586 at   | 1.63 | 0.00 |
| <i>Caenb2</i>                                                         | Calcium channel, voltage-dependent, beta 2 subunit                                                                                                                                                                                                                                                                                                                     | 1446632 at   | 1.63 | 0.00 |
| <i>Emb</i>                                                            | embigin                                                                                                                                                                                                                                                                                                                                                                | 1415856 at   | 1.63 | 0.00 |
| <i>Tbc1d1</i>                                                         | TBC1 domain family, member 1                                                                                                                                                                                                                                                                                                                                           | 1447016 at   | 1.63 | 0.02 |
| <i>Zfp281</i>                                                         | zinc finger protein 281                                                                                                                                                                                                                                                                                                                                                | 1452045 at   | 1.63 | 0.00 |
| <i>Synpo</i>                                                          | synaptopodin                                                                                                                                                                                                                                                                                                                                                           | 1434089 at   | 1.63 | 0.00 |
| <i>Libr</i>                                                           | lymphotoxin B receptor                                                                                                                                                                                                                                                                                                                                                 | 1416435 at   | 1.63 | 0.00 |
| <i>Rbed1</i>                                                          | RNA binding motif and ELMO domain 1                                                                                                                                                                                                                                                                                                                                    | 1436695 x_at | 1.63 | 0.00 |
| <i>LOC627232</i> /// LOC627424 /// <i>Nrbf2</i>                       | similar to nuclear receptor binding factor 2 /// similar to nuclear receptor binding factor 2 /// nuclear receptor binding factor 2                                                                                                                                                                                                                                    | 1448758_at   | 1.63 | 0.01 |
| <i>Npc2</i>                                                           | Niemann Pick type C2                                                                                                                                                                                                                                                                                                                                                   | 1448513 a_at | 1.63 | 0.00 |
| <i>Ppp1r3d</i>                                                        | protein phosphatase 1, regulatory subunit 3D                                                                                                                                                                                                                                                                                                                           | 1452922 at   | 1.62 | 0.00 |
| <i>Ppp1r3g</i>                                                        | protein phosphatase 1, regulatory (inhibitor) subunit 3G                                                                                                                                                                                                                                                                                                               | 1428923 at   | 1.62 | 0.02 |
| <i>Gpr36</i>                                                          | G protein-coupled receptor 36                                                                                                                                                                                                                                                                                                                                          | 1433485 x_at | 1.62 | 0.00 |
| <i>Syk</i>                                                            | Spleen tyrosine kinase                                                                                                                                                                                                                                                                                                                                                 | 1457239 at   | 1.62 | 0.04 |
| <i>Raph1</i>                                                          | Ras association (RalGDS/AF-6) and pleckstrin homology domains 1                                                                                                                                                                                                                                                                                                        | 1434303 at   | 1.62 | 0.03 |
| <i>Pcdc6ip</i>                                                        | programmed cell death 6 interacting protein                                                                                                                                                                                                                                                                                                                            | 1449674 s_at | 1.62 | 0.00 |
| <i>Limd1</i>                                                          | LIM domains containing 1                                                                                                                                                                                                                                                                                                                                               | 1422730 at   | 1.62 | 0.00 |
| <i>Gna13</i>                                                          | Guanine nucleotide binding protein, alpha 13                                                                                                                                                                                                                                                                                                                           | 1446722 at   | 1.62 | 0.01 |
| ---                                                                   | ---                                                                                                                                                                                                                                                                                                                                                                    | 1428891 at   | 1.62 | 0.03 |
| <i>Schip1</i>                                                         | Schwannomin interacting protein 1                                                                                                                                                                                                                                                                                                                                      | 1458588 at   | 1.62 | 0.08 |
| <i>5730411F24Rik</i>                                                  | RIKEN cDNA 5730411F24 gene                                                                                                                                                                                                                                                                                                                                             | 1430470 at   | 1.62 | 0.00 |
| <i>1190002C06Rik</i>                                                  | RIKEN cDNA 1190002C06 gene                                                                                                                                                                                                                                                                                                                                             | 1424058 at   | 1.62 | 0.00 |
| <i>4933412E12Rik</i>                                                  | RIKEN cDNA 4933412E12 gene                                                                                                                                                                                                                                                                                                                                             | 1429422 at   | 1.62 | 0.00 |
| <i>2610002J02Rik</i>                                                  | RIKEN cDNA 2610002J02 gene                                                                                                                                                                                                                                                                                                                                             | 1456310 a_at | 1.62 | 0.00 |
| <i>Mgea5</i>                                                          | meningioma expressed antigen 5 (hyaluronidase)                                                                                                                                                                                                                                                                                                                         | 1422900 at   | 1.62 | 0.00 |
| <i>Mar-01</i>                                                         | membrane-associated ring finger (C3HC4) 1                                                                                                                                                                                                                                                                                                                              | 1434955 at   | 1.62 | 0.00 |
| <i>Wdr26</i>                                                          | WD repeat domain 26                                                                                                                                                                                                                                                                                                                                                    | 1423962 at   | 1.62 | 0.02 |
| <i>Wdr43</i>                                                          | WD repeat domain 43                                                                                                                                                                                                                                                                                                                                                    | 1428389 s_at | 1.61 | 0.00 |
| <i>1110012M11Rik</i>                                                  | RIKEN cDNA 1110012M11 gene                                                                                                                                                                                                                                                                                                                                             | 1437043 a_at | 1.61 | 0.00 |
| <i>Ptgs2</i>                                                          | prostaglandin-endoperoxide synthase 2                                                                                                                                                                                                                                                                                                                                  | 1417262 at   | 1.61 | 0.02 |
| <i>Mustn1</i>                                                         | musculoskeletal, embryonic nuclear protein 1                                                                                                                                                                                                                                                                                                                           | 1427201 at   | 1.61 | 0.00 |
| <i>D2Bwg1335e</i>                                                     | DNA segment, Chr 2, Brigham & Women's Genetics 1335 expressed                                                                                                                                                                                                                                                                                                          | 1435528 at   | 1.61 | 0.00 |
| ---                                                                   | ---                                                                                                                                                                                                                                                                                                                                                                    | 1441177 at   | 1.61 | 0.01 |
| <i>Nco7</i>                                                           | nuclear receptor coactivator 7                                                                                                                                                                                                                                                                                                                                         | 1454809 at   | 1.61 | 0.01 |
| <i>Ccdc104</i>                                                        | coiled-coil domain containing 104                                                                                                                                                                                                                                                                                                                                      | 1451442 at   | 1.61 | 0.00 |
| <i>Pik3c3</i>                                                         | phosphoinositide-3-kinase, class 3                                                                                                                                                                                                                                                                                                                                     | 1425580 a_at | 1.61 | 0.00 |
| <i>H47</i>                                                            | histocompatibility 47                                                                                                                                                                                                                                                                                                                                                  | 1435735 x_at | 1.61 | 0.02 |
| <i>Lass6</i>                                                          | longevity assurance homolog 6 (S. cerevisiae)                                                                                                                                                                                                                                                                                                                          | 1434418 at   | 1.61 | 0.00 |
| <i>Fkbp10</i>                                                         | FK506 binding protein 10                                                                                                                                                                                                                                                                                                                                               | 1449632 s_at | 1.61 | 0.00 |
| <i>Chmp4b</i>                                                         | chromatin modifying protein 4B                                                                                                                                                                                                                                                                                                                                         | 1451988 s_at | 1.61 | 0.01 |
| <i>Yps54</i>                                                          | vacuolar protein sorting 54 (yeast)                                                                                                                                                                                                                                                                                                                                    | 1418479 at   | 1.61 | 0.04 |
| <i>Prkce</i>                                                          | protein kinase C, epsilon                                                                                                                                                                                                                                                                                                                                              | 1437861 s_at | 1.61 | 0.01 |
| <i>Ctdp1</i>                                                          | CTD (carboxy-terminal domain, RNA polymerase II, polypeptide A) phosphatase, subunit 1                                                                                                                                                                                                                                                                                 | 1452697_at   | 1.61 | 0.01 |
| <i>4930504E06Rik</i>                                                  | RIKEN cDNA 4930504E06 gene                                                                                                                                                                                                                                                                                                                                             | 1426655 a_at | 1.61 | 0.00 |
| <i>Stc1</i>                                                           | stanniocalcin 1                                                                                                                                                                                                                                                                                                                                                        | 1450448 at   | 1.61 | 0.00 |
| <i>Ube2e2</i>                                                         | Ubiquitin-conjugating enzyme E2E 2 (UBC4/5 homolog, yeast)                                                                                                                                                                                                                                                                                                             | 1447025 at   | 1.61 | 0.02 |
| <i>Tmem49</i>                                                         | transmembrane protein 49                                                                                                                                                                                                                                                                                                                                               | 1423722 at   | 1.61 | 0.00 |
| ---                                                                   | Transcribed locus                                                                                                                                                                                                                                                                                                                                                      | 1436697 at   | 1.61 | 0.00 |

|                                          |                                                                                                                                                                     |              |      |      |
|------------------------------------------|---------------------------------------------------------------------------------------------------------------------------------------------------------------------|--------------|------|------|
| <i>1810059G22Rik</i>                     | RIKEN cDNA 1810059G22 gene                                                                                                                                          | 1449842 at   | 1.61 | 0.00 |
| <i>Slco3a1</i>                           | solute carrier organic anion transporter family, member 3a1                                                                                                         | 1434537 at   | 1.61 | 0.00 |
| <i>Seh1</i>                              | SEH1-like (S. cerevisiae)                                                                                                                                           | 1424200 s at | 1.61 | 0.02 |
| <i>Grp1</i>                              | glycine/arginine rich protein 1                                                                                                                                     | 1429843 at   | 1.61 | 0.00 |
| <i>Fst</i>                               | folliculin                                                                                                                                                          | 1421365 at   | 1.61 | 0.02 |
| <i>Psm14</i>                             | Proteasome (prosome, macropain) 26S subunit, non-ATPase, 14                                                                                                         | 1446521 at   | 1.61 | 0.00 |
| <i>Nuak2</i>                             | NUAK family, SNF1-like kinase, 2                                                                                                                                    | 1429049 at   | 1.61 | 0.00 |
| <i>BC027231</i>                          | cDNA sequence BC027231                                                                                                                                              | 1451439 at   | 1.60 | 0.00 |
| <i>Gmns</i>                              | GDP-mannose 4, 6-dehydratase                                                                                                                                        | 1434158 at   | 1.60 | 0.00 |
| <i>Zfand2a</i>                           | zinc finger, AN1-type domain 2A                                                                                                                                     | 1415941 s at | 1.60 | 0.00 |
| <i>Ttc9c</i>                             | tetratricopeptide repeat domain 9C                                                                                                                                  | 1443948 at   | 1.60 | 0.01 |
| <i>Tnip2</i>                             | TNFAIP3 interacting protein 2                                                                                                                                       | 1419488 at   | 1.60 | 0.00 |
| <i>D11Wsu47e</i>                         | DNA segment, Chr 11, Wayne State University 47, expressed                                                                                                           | 1452805 at   | 1.60 | 0.00 |
| <i>Glis3</i>                             | GLIS family zinc finger 3                                                                                                                                           | 1443253 at   | 1.60 | 0.01 |
| <i>Ranbp9</i>                            | RAN binding protein 9                                                                                                                                               | 1456199 x at | 1.60 | 0.00 |
| <i>4933412E12Rik</i>                     | RIKEN cDNA 4933412E12 gene                                                                                                                                          | 1447711 x at | 1.60 | 0.00 |
| <i>1810031K17Rik</i>                     | RIKEN cDNA 1810031K17 gene                                                                                                                                          | 1427879 at   | 1.60 | 0.00 |
| <i>Ppil2</i>                             | peptidylprolyl isomerase (cyclophilin)-like 2                                                                                                                       | 1452920 a at | 1.60 | 0.00 |
| <i>Sik19</i>                             | serine/threonine kinase 19                                                                                                                                          | 1417334 at   | 1.60 | 0.00 |
| <i>Ptpn12</i>                            | protein tyrosine phosphatase, non-receptor type 12                                                                                                                  | 1422045 a at | 1.60 | 0.04 |
| <i>Psmc1</i>                             | protease (prosome, macropain) 26S subunit, ATPase 1                                                                                                                 | 1416005 at   | 1.60 | 0.00 |
| <i>Pdlim7</i>                            | PDZ and LIM domain 7                                                                                                                                                | 1428319 at   | 1.60 | 0.02 |
| <i>Nploc4</i>                            | nuclear protein localization 4 homolog (S. cerevisiae)                                                                                                              | 1454804 at   | 1.60 | 0.00 |
| <i>Mcrs1 /// LOC433780 /// LOC666215</i> | microspherule protein 1 /// similar to Microspherule protein 1 (58 kDa microspherule protein) /// similar to Microspherule protein 1 (58 kDa microspherule protein) | 1416535 at   | 1.60 | 0.00 |
| <i>Ripk1</i>                             | receptor (TNFRSF)-interacting serine-threonine kinase 1                                                                                                             | 1449485 at   | 1.60 | 0.00 |
| <i>Sfp1</i>                              | SFFV proviral integration 1                                                                                                                                         | 1418747 at   | 1.60 | 0.04 |
| <i>Lipe</i>                              | lipase, hormone sensitive                                                                                                                                           | 1422820 at   | 1.60 | 0.00 |
| <i>Med9</i>                              | mediator of RNA polymerase II transcription, subunit 9 homolog (yeast)                                                                                              | 1449448 at   | 1.60 | 0.00 |
| <i>Ube2d3</i>                            | ubiquitin-conjugating enzyme E2D 3 (UBC4/5 homolog, yeast)                                                                                                          | 1455479 a at | 1.59 | 0.01 |
| <i>Edem2</i>                             | ER degradation enhancer, mannosidase alpha-like 2                                                                                                                   | 1423695 at   | 1.59 | 0.00 |
| <i>Cyld</i>                              | cylindromatosis (turban tumor syndrome)                                                                                                                             | 1429618 at   | 1.59 | 0.03 |
| <i>Dlgap4</i>                            | discs, large homolog-associated protein 4 (Drosophila)                                                                                                              | 1426465 at   | 1.59 | 0.01 |
| <i>Parva</i>                             | parvin, alpha                                                                                                                                                       | 1416818 at   | 1.59 | 0.00 |
| <i>Dok1</i>                              | docking protein 1                                                                                                                                                   | 1417790 at   | 1.59 | 0.00 |
| <i>Arl4a</i>                             | ADP-ribosylation factor-like 4A                                                                                                                                     | 1435092 at   | 1.59 | 0.02 |
| <i>BC021438</i>                          | cDNA sequence BC021438                                                                                                                                              | 1424788 at   | 1.59 | 0.00 |
| <i>Sec61a1</i>                           | Sec61 alpha 1 subunit (S. cerevisiae)                                                                                                                               | 1416191 at   | 1.59 | 0.00 |
| <i>Acp2</i>                              | acid phosphatase 2, lysosomal                                                                                                                                       | 1424654 at   | 1.59 | 0.02 |
| <i>Psm14</i>                             | Proteasome (prosome, macropain) 26S subunit, non-ATPase, 14                                                                                                         | 1459734 at   | 1.59 | 0.03 |
| <i>Sh2d3c</i>                            | SH2 domain containing 3C                                                                                                                                            | 1415886 at   | 1.59 | 0.00 |
| <i>Car13</i>                             | carbonic anhydrase 13                                                                                                                                               | 1421308 at   | 1.59 | 0.00 |
| <i>Serine3</i>                           | serine incorporator 3                                                                                                                                               | 1455550 x at | 1.59 | 0.00 |
| <i>Eif4e2</i>                            | eukaryotic translation initiation factor 4E member 2                                                                                                                | 1421985 a at | 1.59 | 0.00 |
| <i>Cd40</i>                              | CD40 antigen                                                                                                                                                        | 1460415 a at | 1.59 | 0.00 |
| <i>Mical1</i>                            | microtubule associated monooxygenase, calponin and LIM domain containing 1                                                                                          | 1456439 x at | 1.59 | 0.01 |
| <i>Tgfb2</i>                             | transforming growth factor, beta 2                                                                                                                                  | 1423250 a at | 1.59 | 0.10 |
| <i>0610040B10Rik</i>                     | RIKEN cDNA 0610040B10 gene                                                                                                                                          | 1456161 at   | 1.59 | 0.00 |
| <i>Prkar1b</i>                           | protein kinase, cAMP dependent regulatory, type I beta                                                                                                              | 1434325 x at | 1.59 | 0.00 |
| <i>Cmya1</i>                             | cardiomyopathy associated 1                                                                                                                                         | 1419220 at   | 1.59 | 0.00 |
| <i>Cttn</i>                              | cortactin                                                                                                                                                           | 1421313 s at | 1.59 | 0.01 |
| <i>Rnf149</i>                            | ring finger protein 149                                                                                                                                             | 1429321 at   | 1.59 | 0.00 |
| <i>Marcks11</i>                          | MARCKS-like 1                                                                                                                                                       | 1415922 s at | 1.59 | 0.02 |
| <i>1110008P14Rik</i>                     | RIKEN cDNA 1110008P14 gene                                                                                                                                          | 1459890 s at | 1.59 | 0.00 |
| <i>Prpf6</i>                             | PRP6 pre-mRNA splicing factor 6 homolog (yeast)                                                                                                                     | 1454789 x at | 1.59 | 0.01 |
| <i>Supt4h1 /// Supt4h2</i>               | suppressor of Ty 4 homolog 1 (S. cerevisiae) /// suppressor of Ty 4 homolog 2 (S. cerevisiae)                                                                       | 1422418_s_at | 1.59 | 0.00 |
| <i>Arid5b</i>                            | AT rich interactive domain 5B (Mrf1 like)                                                                                                                           | 1442176 at   | 1.59 | 0.01 |
| <i>Ssr1 /// LOC636537</i>                | signal sequence receptor, alpha /// similar to signal sequence receptor, alpha                                                                                      | 1417764 at   | 1.59 | 0.00 |
| <i>2410018G20Rik</i>                     | RIKEN cDNA 2410018G20 gene                                                                                                                                          | 1452591 a at | 1.59 | 0.00 |
| <i>Mocs3</i>                             | molybdenum cofactor synthesis 3                                                                                                                                     | 1428924 at   | 1.59 | 0.00 |
| <i>Baz1a</i>                             | bromodomain adjacent to zinc finger domain 1A                                                                                                                       | 1447930 at   | 1.59 | 0.02 |
| <i>A1662270</i>                          | expressed sequence A1662270                                                                                                                                         | 1434068 s at | 1.59 | 0.02 |
| <i>Adipor2</i>                           | adiponectin receptor 2                                                                                                                                              | 1434329 s at | 1.59 | 0.00 |
| <i>Hrasl3</i>                            | HRAS like suppressor 3                                                                                                                                              | 1445597 s at | 1.59 | 0.00 |
| <i>Oact5</i>                             | O-acyltransferase (membrane bound) domain containing 5                                                                                                              | 1423960 at   | 1.58 | 0.00 |
| <i>C730025P13Rik</i>                     | RIKEN cDNA C730025P13 gene                                                                                                                                          | 1426277 at   | 1.58 | 0.00 |
| <i>Wdr46</i>                             | WD repeat domain 46                                                                                                                                                 | 1437828 s at | 1.58 | 0.00 |
| <i>Sec23b</i>                            | SEC23B (S. cerevisiae)                                                                                                                                              | 1416059 at   | 1.58 | 0.03 |
| <i>Rpo1-3</i>                            | RNA polymerase 1-3                                                                                                                                                  | 1451120 at   | 1.58 | 0.00 |
| <i>Chka</i>                              | choline kinase alpha                                                                                                                                                | 1450264 a at | 1.58 | 0.00 |
| <i>Elov11</i>                            | elongation of very long chain fatty acids (FEN1/Elo2, SUR4/Elo3, yeast)-like 1                                                                                      | 1456530 x at | 1.58 | 0.00 |
| <i>C230035I16Rik</i>                     | RIKEN cDNA C230035I16 gene                                                                                                                                          | 1458976 at   | 1.58 | 0.00 |
| <i>Carhsp1</i>                           | calcium regulated heat stable protein 1                                                                                                                             | 1415976 a at | 1.58 | 0.00 |
| <i>Ezh1</i>                              | enhancer of zeste homolog 1 (Drosophila)                                                                                                                            | 1418290 a at | 1.58 | 0.00 |
| <i>Pi4k2a</i>                            | phosphatidylinositol 4-kinase type 2 alpha                                                                                                                          | 1454605 a at | 1.58 | 0.01 |
| <i>E430034L04Rik</i>                     | RIKEN cDNA E430034L04 gene                                                                                                                                          | 1415697 at   | 1.58 | 0.02 |
| <i>Limk1</i>                             | LIM-domain containing, protein kinase                                                                                                                               | 1417627 a at | 1.58 | 0.00 |
| <i>Pdia6</i>                             | protein disulfide isomerase associated 6                                                                                                                            | 1423648 at   | 1.58 | 0.00 |
| <i>Mmp19</i>                             | matrix metalloproteinase 19                                                                                                                                         | 1421977 at   | 1.58 | 0.02 |
| <i>5033414D02Rik</i>                     | RIKEN cDNA 5033414D02 gene                                                                                                                                          | 1460361 at   | 1.58 | 0.00 |
| <i>A1413582</i>                          | expressed sequence A1413582                                                                                                                                         | 1452599 s at | 1.58 | 0.00 |
| <i>Psmc4</i>                             | proteasome (prosome, macropain) 26S subunit, ATPase, 4                                                                                                              | 1416290 a at | 1.58 | 0.00 |
| <i>Rnf113a2</i>                          | ring finger protein 113A2                                                                                                                                           | 1428415 at   | 1.58 | 0.00 |
| <i>Ufd11</i>                             | ubiquitin fusion degradation 1 like                                                                                                                                 | 1432367 a at | 1.58 | 0.00 |
| <i>Map2k1</i>                            | mitogen activated protein kinase kinase 1                                                                                                                           | 1416351 at   | 1.57 | 0.02 |
| <i>Ttc9c</i>                             | tetratricopeptide repeat domain 9C                                                                                                                                  | 1434001 at   | 1.57 | 0.04 |
| <i>Obfc1</i>                             | oligonucleotide/oligosaccharide-binding fold containing 1                                                                                                           | 1434737 at   | 1.57 | 0.00 |
| <i>Arid5b</i>                            | AT rich interactive domain 5B (Mrf1 like)                                                                                                                           | 1456973 at   | 1.57 | 0.01 |
| <i>Hnrpa1</i>                            | heterogeneous nuclear ribonucleoprotein A1                                                                                                                          | 1436549 a at | 1.57 | 0.00 |
| <i>Elov11</i>                            | elongation of very long chain fatty acids (FEN1/Elo2, SUR4/Elo3, yeast)-like 1                                                                                      | 1455994 x at | 1.57 | 0.00 |
| <i>F11r</i>                              | F11 receptor                                                                                                                                                        | 1424595 at   | 1.57 | 0.00 |
| <i>Ube4a</i>                             | ubiquitination factor E4A, UFD2 homolog (S. cerevisiae)                                                                                                             | 1437747 at   | 1.57 | 0.00 |
| <i>2510048O06Rik</i>                     | RIKEN cDNA 2510048O06 gene                                                                                                                                          | 1416979 at   | 1.57 | 0.00 |
| <i>4930504E06Rik</i>                     | RIKEN cDNA 4930504E06 gene                                                                                                                                          | 1437046 x at | 1.57 | 0.00 |
| <i>Tln1</i>                              | talin 1                                                                                                                                                             | 1436042 at   | 1.57 | 0.00 |
| <i>Ncf1</i>                              | neutrophil cytosolic factor 1                                                                                                                                       | 1451767 at   | 1.57 | 0.01 |

|                       |                                                                                     |              |      |      |
|-----------------------|-------------------------------------------------------------------------------------|--------------|------|------|
| <i>Enpp4</i>          | ectonucleotide pyrophosphatase/phosphodiesterase 4                                  | 1434580 at   | 1.57 | 0.02 |
| <i>2500002L14Rik</i>  | RIKEN cDNA 2500002L14 gene                                                          | 1423729 a at | 1.57 | 0.00 |
| <i>Ctdsp2</i>         | CTD (carboxy-terminal domain, RNA polymerase II, polypeptide A) small phosphatase 2 | 1423660 at   | 1.57 | 0.02 |
| <i>Lvl1</i>           | LTV1 homolog (S. cerevisiae)                                                        | 1426813 at   | 1.57 | 0.04 |
| <i>1500032H18Rik</i>  | RIKEN cDNA 1500032H18 gene                                                          | 1439261 x at | 1.57 | 0.00 |
| <i>Rff1</i>           | ring finger and FYVE like domain containing protein                                 | 1434432 at   | 1.57 | 0.03 |
| <i>Sellh</i>          | Sell (suppressor of lin-12) 1 homolog (C. elegans)                                  | 1425187 at   | 1.57 | 0.00 |
| <i>BC060631</i>       | cDNA sequence BC060631                                                              | 1434381 at   | 1.57 | 0.01 |
| <i>2310024N18Rik</i>  | RIKEN cDNA 2310024N18 gene                                                          | 1453482 at   | 1.57 | 0.00 |
| <i>Sxtp3a</i>         | syntaxin binding protein 3A                                                         | 1416653 at   | 1.57 | 0.01 |
| <i>Lrch1</i>          | leucine-rich repeats and calponin homology (CH) domain containing 1                 | 1442502 at   | 1.57 | 0.00 |
| ---                   | ---                                                                                 | 1452870 at   | 1.57 | 0.00 |
| <i>Trib3</i>          | tribbles homolog 3 (Drosophila)                                                     | 1456225 x at | 1.57 | 0.00 |
| <i>Zfp568</i>         | zinc finger protein 568                                                             | 1435091 at   | 1.57 | 0.02 |
| <i>Pigl</i>           | Phosphatidylinositol glycan, class L                                                | 1440965 at   | 1.56 | 0.02 |
| <i>2610208M17Rik</i>  | RIKEN cDNA 2610208M17 gene                                                          | 1460345 at   | 1.56 | 0.00 |
| <i>Cdh22</i>          | cadherin 22                                                                         | 1424767 at   | 1.56 | 0.00 |
| <i>Noc4l</i>          | nucleolar complex associated 4 homolog (S. cerevisiae)                              | 1423827 s at | 1.56 | 0.00 |
| <i>Fem1b</i>          | feminization 1 homolog b (C. elegans)                                               | 1418324 at   | 1.56 | 0.00 |
| <i>Casp1</i>          | caspase 1                                                                           | 1449265 at   | 1.56 | 0.00 |
| <i>Lgi2</i>           | leucine-rich repeat LGI family, member 2                                            | 1457040 at   | 1.56 | 0.00 |
| <i>Srm</i>            | spermidine synthase                                                                 | 1421260 a at | 1.56 | 0.00 |
| <i>Abhd4</i>          | abhydrolase domain containing 4                                                     | 1416315 at   | 1.56 | 0.00 |
| <i>Ufm1</i>           | ubiquitin-fold modifier 1                                                           | 1449263 at   | 1.56 | 0.00 |
| <i>2410001C21Rik</i>  | RIKEN cDNA 2410001C21 gene                                                          | 1460362 at   | 1.56 | 0.00 |
| <i>Vrk3</i>           | vaccinia related kinase 3                                                           | 1418121 at   | 1.56 | 0.00 |
| <i>Psm11</i>          | proteasome (prosome, macropain) 26S subunit, non-ATPase, 11                         | 1456059 at   | 1.56 | 0.00 |
| <i>Tmem34</i>         | transmembrane protein 34                                                            | 1426628 at   | 1.56 | 0.03 |
| <i>Rab34</i>          | RAB34, member of RAS oncogene family                                                | 1416591 at   | 1.56 | 0.00 |
| <i>Dapk1</i>          | death associated protein kinase 1                                                   | 1426915 at   | 1.56 | 0.00 |
| <i>Sqstm1</i>         | sequestosome 1                                                                      | 1450957 a at | 1.56 | 0.00 |
| <i>1500034J01Rik</i>  | RIKEN cDNA 1500034J01 gene                                                          | 1429038 at   | 1.56 | 0.00 |
| <i>9030619P08Rik</i>  | RIKEN cDNA 9030619P08 gene                                                          | 1443889 at   | 1.56 | 0.00 |
| <i>Shc1</i>           | src homology 2 domain-containing transforming protein C1                            | 1422854 at   | 1.56 | 0.00 |
| <i>Kcna1</i>          | Potassium voltage-gated channel, subfamily Q, member 1                              | 1459443 at   | 1.56 | 0.05 |
| <i>Snf1lk2</i>        | SNF1-like kinase 2                                                                  | 1457276 at   | 1.56 | 0.00 |
| <i>Ubx2</i>           | UBX domain containing 2                                                             | 1426486 at   | 1.56 | 0.00 |
| <i>5730403M16Rik</i>  | RIKEN cDNA 5730403M16 gene                                                          | 1434343 at   | 1.56 | 0.00 |
| <i>Ipo4</i>           | importin 4                                                                          | 1436420 a at | 1.56 | 0.00 |
| <i>1110059G10Rik</i>  | RIKEN cDNA 1110059G10 gene                                                          | 1418048 at   | 1.55 | 0.03 |
| <i>Lhx6</i>           | LIM homeobox protein 6                                                              | 1425094 a at | 1.55 | 0.01 |
| <i>Ifnar2</i>         | interferon (alpha and beta) receptor 2                                              | 1451462 a at | 1.55 | 0.00 |
| <i>Hk3</i>            | hexokinase 3                                                                        | 1442798 x at | 1.55 | 0.02 |
| <i>Camkk2</i>         | calcium/calmodulin-dependent protein kinase kinase 2, beta                          | 1424475 at   | 1.55 | 0.00 |
| <i>Timeless</i>       | timeless homolog (Drosophila)                                                       | 1417586 at   | 1.55 | 0.01 |
| ---                   | Transcribed locus                                                                   | 1439616 at   | 1.55 | 0.02 |
| <i>Thrap2</i>         | thyroid hormone receptor associated protein 2                                       | 1434602 at   | 1.55 | 0.00 |
| <i>Wdr45</i>          | WD repeat domain 45                                                                 | 1424786 s at | 1.55 | 0.00 |
| ---                   | ---                                                                                 | 1458703 at   | 1.55 | 0.02 |
| <i>Igf3</i>           | insulin-like growth factor binding protein 3                                        | 1423062 at   | 1.55 | 0.00 |
| <i>Abce1</i>          | ATP-binding cassette, sub-family E (OABP), member 1                                 | 1416014 at   | 1.55 | 0.01 |
| <i>Slc35a2</i>        | solute carrier family 35 (UDP-galactose transporter), member 2                      | 1439433 s at | 1.55 | 0.00 |
| <i>Col4a2</i>         | procollagen, type IV, alpha 2                                                       | 1424051 at   | 1.55 | 0.00 |
| <i>Nsun2</i>          | NOL1/NOP2/Sun domain family 2                                                       | 1423850 at   | 1.55 | 0.00 |
| <i>Zfp496</i>         | zinc finger protein 496                                                             | 1434088 at   | 1.55 | 0.00 |
| <i>5430411K18Rik</i>  | RIKEN cDNA 5430411K18 gene                                                          | 1428419 at   | 1.55 | 0.01 |
| <i>Lig3</i>           | ligase III, DNA, ATP-dependent                                                      | 1425865 a at | 1.55 | 0.00 |
| <i>Sap30bp</i>        | SAP30 binding protein                                                               | 1449295 at   | 1.55 | 0.00 |
| <i>Rabgef1</i>        | RAB guanine nucleotide exchange factor (GEF) 1                                      | 1419067 a at | 1.55 | 0.00 |
| <i>Lrch1</i>          | leucine-rich repeats and calponin homology (CH) domain containing 1                 | 1438032 at   | 1.54 | 0.04 |
| <i>4930504E06Rik</i>  | RIKEN cDNA 4930504E06 gene                                                          | 1426656 at   | 1.54 | 0.00 |
| <i>C430014M02Rik</i>  | RIKEN cDNA C430014M02 gene                                                          | 1455339 at   | 1.54 | 0.00 |
| <i>Actn1</i>          | actinin, alpha 1                                                                    | 1452415 at   | 1.54 | 0.03 |
| <i>Snape4</i>         | small nuclear RNA activating complex, polypeptide 4                                 | 1455552 at   | 1.54 | 0.00 |
| <i>Rcn1</i>           | reticulocalbin 1                                                                    | 1417090 at   | 1.54 | 0.02 |
| ---                   | CDNA clone MGC:107680 IMAGE:6766535                                                 | 1436530 at   | 1.54 | 0.02 |
| <i>Rbm13</i>          | RNA binding motif protein 13                                                        | 1426426 at   | 1.54 | 0.00 |
| <i>Snrpa1</i>         | small nuclear ribonucleoprotein polypeptide A'                                      | 1417352 s at | 1.54 | 0.00 |
| <i>Lsg1</i>           | large subunit GTPase 1 homolog (S. cerevisiae)                                      | 1437630 at   | 1.54 | 0.00 |
| <i>Pard6b</i>         | par-6 (partitioning defective 6) homolog beta (C. elegans)                          | 1423175 s at | 1.54 | 0.00 |
| <i>Etf1</i>           | eukaryotic translation termination factor 1                                         | 1420023 at   | 1.54 | 0.00 |
| <i>Zfp217</i>         | zinc finger protein 217                                                             | 1437414 at   | 1.54 | 0.01 |
| <i>D10Wsu52e</i>      | DNA segment, Chr 10, Wayne State University 52, expressed                           | 1420129 s at | 1.54 | 0.00 |
| <i>Stam2</i>          | signal transducing adaptor molecule (SH3 domain and ITAM motif) 2                   | 1416974 at   | 1.53 | 0.02 |
| <i>A1848100</i>       | expressed sequence A1848100                                                         | 1455133 s at | 1.53 | 0.01 |
| <i>Eef2k</i>          | eukaryotic elongation factor-2 kinase                                               | 1437829 s at | 1.53 | 0.02 |
| <i>Rab10</i>          | RAB10, member RAS oncogene family                                                   | 1422664 at   | 1.53 | 0.00 |
| <i>Socs1</i>          | suppressor of cytokine signaling 1                                                  | 1440047 at   | 1.53 | 0.02 |
| <i>Slc35b3</i>        | solute carrier family 35, member B3                                                 | 1448937 at   | 1.53 | 0.01 |
| <i>Gtpp4</i>          | GTP binding protein 4                                                               | 1450873 at   | 1.53 | 0.00 |
| <i>Ubb /// Gm1821</i> | ubiquitin B /// gene model 1821, (NCBI)                                             | 1453723 x at | 1.53 | 0.00 |
| <i>4933421E11Rik</i>  | RIKEN cDNA 4933421E11 gene                                                          | 1428162 at   | 1.53 | 0.10 |
| <i>Pabpc1</i>         | poly A binding protein, cytoplasmic 1                                               | 1418883 a at | 1.53 | 0.00 |
| <i>1110014J01Rik</i>  | RIKEN cDNA 1110014J01 gene                                                          | 1448141 at   | 1.53 | 0.00 |
| <i>Abi1</i>           | abl-interactor 1                                                                    | 1450890 a at | 1.53 | 0.10 |
| <i>Itgb1</i>          | integrin beta 1 (fibronectin receptor beta)                                         | 1452545 a at | 1.53 | 0.07 |
| <i>C530014P21Rik</i>  | RIKEN cDNA C530014P21 gene                                                          | 1441577 at   | 1.53 | 0.02 |
| ---                   | ---                                                                                 | 1422687 at   | 1.53 | 0.00 |
| <i>Malt1</i>          | mucosa associated lymphoid tissue lymphoma translocation gene 1                     | 1456126 at   | 1.53 | 0.01 |
| <i>Coasy</i>          | Coenzyme A synthase                                                                 | 1443829 x at | 1.53 | 0.02 |
| <i>Mcm6</i>           | minichromosome maintenance deficient 6 (MIS5 homolog, S. pombe) (S. cerevisiae)     | 1438852 x at | 1.53 | 0.02 |
| <i>Ccbp2</i>          | chemokine binding protein 2                                                         | 1437937 at   | 1.53 | 0.03 |
| <i>Arpc5</i>          | actin related protein 2/3 complex, subunit 5                                        | 1448129 at   | 1.53 | 0.00 |
| <i>Flnb</i>           | filamin, beta                                                                       | 1426750 at   | 1.53 | 0.01 |
| <i>Mki67ip</i>        | Mki67 (FHA domain) interacting nucleolar phosphoprotein                             | 1424001 at   | 1.53 | 0.00 |
| <i>2610028H24Rik</i>  | RIKEN cDNA 2610028H24 gene                                                          | 1453919 at   | 1.53 | 0.00 |
| <i>AV025504</i>       | Expressed sequence AV025504                                                         | 1433898 at   | 1.53 | 0.01 |

|                               |                                                                                                         |              |      |      |
|-------------------------------|---------------------------------------------------------------------------------------------------------|--------------|------|------|
| <i>Nras</i>                   | neuroblastoma ras oncogene                                                                              | 1454060 a at | 1.53 | 0.02 |
| <i>Inhbb</i>                  | inhibin beta-B                                                                                          | 1426859 at   | 1.53 | 0.02 |
| <i>Picalm</i>                 | phosphatidylinositol binding clathrin assembly protein                                                  | 1451316 a at | 1.53 | 0.01 |
| <i>Ypel5</i>                  | vipee-like 5 (Drosophila)                                                                               | 1451196 at   | 1.53 | 0.00 |
| <i>Gngt2</i>                  | guanine nucleotide binding protein (G protein), gamma transducing activity polypeptide 2                | 1428733 at   | 1.53 | 0.00 |
| <i>Tom1 // LOC545878</i>      | target of myb1 homolog (chicken) // similar to TOM1                                                     | 1431188 a at | 1.53 | 0.01 |
| <i>Rpl23</i>                  | ribosomal protein L23                                                                                   | 1422859 a at | 1.53 | 0.00 |
| <i>Tpm4</i>                   | tropomyosin 4                                                                                           | 1433883 at   | 1.53 | 0.02 |
| <i>Rab11a</i>                 | RAB11a, member RAS oncogene family                                                                      | 1449256 a at | 1.53 | 0.00 |
| <i>Snora65</i>                | small nucleolar RNA, H/ACA box 65                                                                       | 1435655 at   | 1.53 | 0.01 |
| <i>D17Wsu104e</i>             | DNA segment, Chr 17, Wayne State University 104, expressed                                              | 1448439 at   | 1.52 | 0.02 |
| <i>1700066J24Rik</i>          | RIKEN cDNA 1700066J24 gene                                                                              | 1436150 at   | 1.52 | 0.02 |
| <i>Heatr1</i>                 | HEAT repeat containing 1                                                                                | 1424522 at   | 1.52 | 0.00 |
| <i>A530088H08Rik</i>          | RIKEN cDNA A530088H08 gene                                                                              | 1447493 at   | 1.52 | 0.07 |
| <i>Prep</i>                   | prolyl endopeptidase                                                                                    | 1439942 at   | 1.52 | 0.03 |
| <i>Phc2</i>                   | polyhomeotic-like 2 (Drosophila)                                                                        | 1416048 at   | 1.52 | 0.01 |
| <i>Eif3s1</i>                 | eukaryotic translation initiation factor 3, subunit 1 alpha                                             | 1426395 s at | 1.52 | 0.01 |
| <i>Ick</i>                    | intestinal cell kinase                                                                                  | 1448310 at   | 1.52 | 0.00 |
| <i>Dpp9</i>                   | dipeptidylpeptidase 9                                                                                   | 1455884 at   | 1.52 | 0.01 |
| <i>Hivp3</i>                  | human immunodeficiency virus type 1 enhancer binding protein 3                                          | 1429134 at   | 1.52 | 0.00 |
| <i>Scamp2</i>                 | secretory carrier membrane protein 2                                                                    | 1416611 at   | 1.52 | 0.00 |
| <i>Pprc1</i>                  | peroxisome proliferative activated receptor, gamma, coactivator-related 1                               | 1426381 at   | 1.52 | 0.00 |
| <i>1110008L16Rik</i>          | RIKEN cDNA 1110008L16 gene                                                                              | 1428775 at   | 1.52 | 0.00 |
| <i>Rhog</i>                   | ras homolog gene family, member G                                                                       | 1422572 at   | 1.52 | 0.00 |
| <i>1190005P17Rik</i>          | RIKEN cDNA 1190005P17 gene                                                                              | 1428475 at   | 1.52 | 0.00 |
| <i>BC087945</i>               | cDNA sequence BC087945                                                                                  | 1427966 at   | 1.52 | 0.00 |
| <i>2010004M13Rik</i>          | RIKEN cDNA 2010004M13 gene                                                                              | 1455646 at   | 1.52 | 0.00 |
| <i>Stard5</i>                 | StAR-related lipid transfer (START) domain containing 5                                                 | 1422821 s at | 1.52 | 0.00 |
| <i>Parp4</i>                  | poly (ADP-ribose) polymerase family, member 4                                                           | 1441026 at   | 1.52 | 0.05 |
| <i>Inpp5d</i>                 | inositol polyphosphate-5-phosphatase D                                                                  | 1418110 a at | 1.52 | 0.00 |
| <i>Bet1l</i>                  | blocked early in transport 1 homolog (S. cerevisiae)-like                                               | 1453570 x at | 1.52 | 0.00 |
| <i>Entpd1</i>                 | ectonucleoside triphosphate diphosphohydrolase 1                                                        | 1453586 at   | 1.52 | 0.03 |
| <i>0910001A06Rik</i>          | RIKEN cDNA 0910001A06 gene                                                                              | 1423829 at   | 1.52 | 0.02 |
| <i>Csmd1</i>                  | CUB and Sushi multiple domains 1                                                                        | 1443179 at   | 1.52 | 0.00 |
| ---                           | ---                                                                                                     | 1460133 at   | 1.52 | 0.02 |
| <i>Rnf4</i>                   | ring finger protein 4                                                                                   | 1423654 a at | 1.52 | 0.03 |
| <i>Peci</i>                   | peroxisomal delta3, delta2-enoyl-Coenzyme A isomerase                                                   | 1431012 a at | 1.52 | 0.00 |
| <i>Rod1</i>                   | ROD1 regulator of differentiation 1 (S. pombe)                                                          | 1424084 at   | 1.52 | 0.07 |
| ---                           | ---                                                                                                     | 1458586 at   | 1.51 | 0.03 |
| <i>Seh1l</i>                  | SEH1-like (S. cerevisiae)                                                                               | 1419967 at   | 1.51 | 0.07 |
| <i>Trib3</i>                  | tribbles homolog 3 (Drosophila)                                                                         | 1426065 a at | 1.51 | 0.00 |
| <i>Rbm34</i>                  | RNA binding motif protein 34                                                                            | 1436595 at   | 1.51 | 0.07 |
| <i>Dnajc1</i>                 | DnaJ (Hsp40) homolog, subfamily C, member 1                                                             | 1420500 at   | 1.51 | 0.00 |
| <i>2400006N03Rik</i>          | RIKEN cDNA 2400006N03 gene                                                                              | 1441814 s at | 1.51 | 0.00 |
| <i>Tax1bp1</i>                | Tax1 (human T-cell leukemia virus type 1) binding protein 1                                             | 1448399 at   | 1.51 | 0.00 |
| <i>Rnf121</i>                 | ring finger protein 121                                                                                 | 1426503 a at | 1.51 | 0.00 |
| <i>Slc9a3r1</i>               | solute carrier family 9 (sodium/hydrogen exchanger), isoform 3 regulator 1                              | 1438116 x at | 1.51 | 0.00 |
| <i>Cltb</i>                   | clathrin, light polypeptide (Lcb)                                                                       | 1460740 at   | 1.51 | 0.00 |
| <i>5033414K04Rik</i>          | RIKEN cDNA 5033414K04 gene                                                                              | 1436999 at   | 1.51 | 0.00 |
| <i>Tmem19</i>                 | transmembrane protein 19                                                                                | 1416261 at   | 1.51 | 0.00 |
| <i>Tmem62</i>                 | transmembrane protein 62                                                                                | 1455350 at   | 1.51 | 0.00 |
| <i>Psmc2</i>                  | proteasome (prosome, macropain) 26S subunit, ATPase 2                                                   | 1426611 at   | 1.51 | 0.00 |
| <i>Polr3gl</i>                | polymerase (RNA) III (DNA directed) polypeptide G like                                                  | 1451364 at   | 1.51 | 0.00 |
| <i>Phca</i>                   | phytoceramidase, alkaline                                                                               | 1429520 a at | 1.51 | 0.02 |
| <i>C330023M02Rik</i>          | RIKEN cDNA C330023M02 gene                                                                              | 1439027 at   | 1.51 | 0.02 |
| <i>Zfp697</i>                 | zinc finger protein 697                                                                                 | 1427594 at   | 1.51 | 0.02 |
| <i>Ralb</i>                   | v-ral simian leukemia viral oncogene homolog B (ras related)                                            | 1417744 a at | 1.51 | 0.00 |
| <i>Tmed10 // LOC634748</i>    | transmembrane emp24-like trafficking protein 10 (yeast) // similar to transmembrane trafficking protein | 1439444_x at | 1.51 | 0.00 |
| <i>C1galt1</i>                | core 1 UDP-galactose:N-acetylgalactosamine-alpha-R beta 1,3-galactosyltransferase                       | 1450745 at   | 1.51 | 0.00 |
| <i>Ell2</i>                   | elongation factor RNA polymerase II 2                                                                   | 1450744 at   | 1.51 | 0.07 |
| <i>Dclre1b</i>                | DNA cross-link repair 1B, PSO2 homolog (S. cerevisiae)                                                  | 1440383 at   | 1.51 | 0.00 |
| <i>Plp2</i>                   | proteolipid protein 2                                                                                   | 1453572 a at | 1.50 | 0.01 |
| <i>Ubb // Gm1821</i>          | ubiquitin B // gene model 1821, (NCBI)                                                                  | 1435643 x at | 1.50 | 0.00 |
| <i>Prmt5</i>                  | protein arginine N-methyltransferase 5                                                                  | 1427439 s at | 1.50 | 0.00 |
| <i>Fkbp10</i>                 | FK506 binding protein 10                                                                                | 1415951 at   | 1.50 | 0.02 |
| <i>Lrp10</i>                  | low-density lipoprotein receptor-related protein 10                                                     | 1416836 at   | 1.50 | 0.00 |
| <i>Etf1</i>                   | eukaryotic translation termination factor 1                                                             | 1420024 s at | 1.50 | 0.00 |
| <i>Zfp294</i>                 | zinc finger protein 294                                                                                 | 1452612 at   | 1.50 | 0.00 |
| <i>2610020H08Rik</i>          | RIKEN cDNA 2610020H08 gene                                                                              | 1436673 at   | 1.50 | 0.00 |
| <i>Cnot6</i>                  | CCR4-NOT transcription complex, subunit 6                                                               | 1426683 at   | 1.50 | 0.01 |
| <i>Btg1</i>                   | B-cell translocation gene 1, anti-proliferative                                                         | 1437455 a at | 1.50 | 0.03 |
| <i>BC003993</i>               | cDNA sequence BC003993                                                                                  | 1438278 a at | 1.50 | 0.01 |
| ---                           | ---                                                                                                     | 1446947 at   | 1.50 | 0.03 |
| <i>Psm2</i>                   | proteasome (prosome, macropain) subunit, alpha type 2                                                   | 1448206 at   | 1.50 | 0.00 |
| <i>D230025D16Rik</i>          | RIKEN cDNA D230025D16 gene                                                                              | 1426521 at   | 1.50 | 0.01 |
| <i>Furin</i>                  | furin (paired basic amino acid cleaving enzyme)                                                         | 1418518 at   | 1.50 | 0.00 |
| <i>Zfp207</i>                 | zinc finger protein 207                                                                                 | 1423545 a at | 1.50 | 0.04 |
| <i>2310061J03Rik</i>          | RIKEN cDNA 2310061J03 gene                                                                              | 1449304 at   | 1.50 | 0.00 |
| <i>Psm3</i>                   | proteasome (prosome, macropain) subunit, alpha type 3                                                   | 1448442 a at | 1.50 | 0.00 |
| <i>Atf4</i>                   | activating transcription factor 4                                                                       | 1448135 at   | 1.50 | 0.00 |
| <i>Zfp313</i>                 | zinc finger protein 313                                                                                 | 1427874 at   | 1.50 | 0.00 |
| <i>Prg1</i>                   | proteoglycan 1, secretory granule                                                                       | 1417426 at   | 1.50 | 0.05 |
| <i>2810457I06Rik</i>          | RIKEN cDNA 2810457I06 gene                                                                              | 1436805 at   | 1.50 | 0.00 |
| <i>LOC623809 // LOC677159</i> | similar to non-SMC element 1 homolog // similar to non-SMC element 1 homolog                            | 1455927 x at | 1.50 | 0.00 |
| <i>Cdc42</i>                  | cell division cycle 42 homolog (S. cerevisiae)                                                          | 1435807 at   | 1.50 | 0.02 |
| <i>Gabarapl2</i>              | gamma-aminobutyric acid (GABA-A) receptor-associated protein-like 2                                     | 1441376 at   | 1.50 | 0.02 |
| <i>Dnaj1</i>                  | DnaJ (Hsp40) homolog, subfamily A, member 1                                                             | 1437220 x at | 1.50 | 0.00 |
| <i>Odf1</i>                   | oral-facial-digital syndrome 1 gene homolog (human)                                                     | 1427172 at   | 1.50 | 0.01 |
| <i>2610511O17Rik</i>          | RIKEN cDNA 2610511O17 gene                                                                              | 1452665 at   | 1.50 | 0.00 |
| <i>Mfsd1</i>                  | major facilitator superfamily domain containing 1                                                       | 1424129 at   | 1.50 | 0.00 |
| <i>Eif2s2</i>                 | eukaryotic translation initiation factor 2, subunit 2 (beta)                                            | 1456617 a at | 1.50 | 0.01 |
| <i>Vti1a</i>                  | vesicle transport through interaction with t-SNAREs homolog 1A (yeast)                                  | 1419190 at   | 1.50 | 0.00 |
| <i>Nup50</i>                  | nucleoporin 50                                                                                          | 1450722 at   | 1.50 | 0.01 |
| <i>C530014P21Rik</i>          | RIKEN cDNA C530014P21 gene                                                                              | 1447510 at   | 1.50 | 0.03 |
| <i>Lpin2</i>                  | lipin 2                                                                                                 | 1452836 at   | 1.50 | 0.04 |
| <i>Rassf1</i>                 | Ras association (RalGDS/AF-6) domain family 1                                                           | 1441737 s at | 1.50 | 0.00 |



| Gene Symbol                                | Gene Name                                                                                                                               | Affymetrix ID                | Fold-Change | %FDR |
|--------------------------------------------|-----------------------------------------------------------------------------------------------------------------------------------------|------------------------------|-------------|------|
|                                            | <b>Down-Regulated</b>                                                                                                                   |                              |             |      |
| <i>Sulf1</i>                               | sulfatase 1                                                                                                                             | 1436319 at                   | -1.50       | 0.00 |
| <i>Fxyd2</i>                               | FXYD domain-containing ion transport regulator 2                                                                                        | 1419378 a at                 | -1.50       | 0.00 |
| <i>Hist2h2be</i>                           | histone 2, H2be                                                                                                                         | 1455095 at                   | -1.50       | 0.01 |
| <i>Fgf13</i>                               | fibroblast growth factor 13                                                                                                             | 1418497 at                   | -1.50       | 0.00 |
| <i>Ube2y2</i>                              | ubiquitin-conjugating enzyme E2 variant 2                                                                                               | 1429131 at                   | -1.50       | 0.00 |
| <i>Igsf4a</i>                              | immunoglobulin superfamily, member 4A                                                                                                   | 1417378 at                   | -1.50       | 0.00 |
| <i>Myo10</i>                               | myosin X                                                                                                                                | 1454731 at                   | -1.50       | 0.00 |
| <i>1110001J03Rik</i>                       | RIKEN cDNA 1110001J03 gene                                                                                                              | 1416367 at                   | -1.50       | 0.00 |
| <i>Fzd2</i>                                | frizzled homolog 2 (Drosophila)                                                                                                         | 1418533 s at                 | -1.50       | 0.01 |
| <i>Gprasp1</i>                             | G protein-coupled receptor associated sorting protein 1                                                                                 | 1424455 at                   | -1.50       | 0.00 |
| <i>Ddx5</i>                                | DEAD (Asp-Glu-Ala-Asp) box polypeptide 5                                                                                                | 1423645 a at                 | -1.50       | 0.01 |
| <i>Zfp68</i>                               | zinc finger protein 68                                                                                                                  | 1457571 at                   | -1.50       | 0.00 |
| <i>Mrpl39</i>                              | mitochondrial ribosomal protein L39                                                                                                     | 1417966 at                   | -1.50       | 0.00 |
| <i>Dnajc11</i>                             | DnaJ (Hsp40) homolog, subfamily C, member 11                                                                                            | 1433881 at                   | -1.50       | 0.00 |
| ---                                        | ---                                                                                                                                     | 1416737 at                   | -1.50       | 0.01 |
| <i>Zbtb20</i>                              | zinc finger and BTB domain containing 20                                                                                                | 1439278 at                   | -1.50       | 0.00 |
| <i>Dbt</i>                                 | dihydroliipoamide branched chain transacylase E2                                                                                        | 1449118 at                   | -1.50       | 0.00 |
| ---                                        | ---                                                                                                                                     | 1438215 at                   | -1.50       | 0.00 |
| <i>Iqsec1</i>                              | IQ motif and Sec7 domain 1                                                                                                              | 1452327 at                   | -1.50       | 0.00 |
| <i>Lrrfip2</i>                             | leucine rich repeat (in FLII) interacting protein 2                                                                                     | 1436378 at                   | -1.50       | 0.00 |
| <i>Gpr137b /// LOC664862 /// LOC673335</i> | G protein-coupled receptor 137B /// similar to transmembrane 7 superfamily member 1 /// similar to transmembrane 7 superfamily member 1 | 1429775_a at                 | -1.50       | 0.00 |
| <i>Notch3</i>                              | Notch gene homolog 3 (Drosophila)                                                                                                       | 1421965 s at                 | -1.50       | 0.01 |
| <i>Spnb2</i>                               | spectrin beta 2                                                                                                                         | 1452143 at                   | -1.50       | 0.00 |
| <i>Eif2c4</i>                              | eukaryotic translation initiation factor 2C, 4                                                                                          | 1429779 at                   | -1.50       | 0.00 |
| <i>Ayl2</i>                                | acyltransferase like 2                                                                                                                  | 1424460 s at                 | -1.50       | 0.00 |
| <i>Ptcd2</i>                               | pentatricopeptide repeat domain 2                                                                                                       | 1423769 at                   | -1.50       | 0.00 |
| <i>2410025L10Rik</i>                       | RIKEN cDNA 2410025L10 gene                                                                                                              | 1428403 at                   | -1.50       | 0.01 |
| <i>Higd1a</i>                              | HIG1 domain family, member 1A                                                                                                           | 1416480 a at                 | -1.50       | 0.00 |
| <i>Hexb</i>                                | hexosaminidase B                                                                                                                        | 1460180 at                   | -1.50       | 0.01 |
| <i>Ttc7</i>                                | tetratricopeptide repeat domain 7                                                                                                       | 1435334 at                   | -1.50       | 0.01 |
| <i>Bxdc2</i>                               | brix domain containing 2                                                                                                                | 1423841 at                   | -1.50       | 0.00 |
| <i>Msrb2</i>                               | methionine sulfoxide reductase B2                                                                                                       | 1424433 at                   | -1.50       | 0.00 |
| <i>Mrpl47</i>                              | mitochondrial ribosomal protein L47                                                                                                     | 1429054 at                   | -1.50       | 0.00 |
| <i>Rass8</i>                               | Ras association (RalGDS/AF-6) domain family 8                                                                                           | 1452283 at                   | -1.50       | 0.00 |
| <i>1200015N20Rik</i>                       | RIKEN cDNA 1200015N20 gene                                                                                                              | 1448557 at                   | -1.50       | 0.01 |
| <i>Mrps2</i>                               | mitochondrial ribosomal protein S2                                                                                                      | 1420846 at                   | -1.50       | 0.00 |
| <i>Arpp19</i>                              | cAMP-regulated phosphoprotein 19                                                                                                        | 1422609 at                   | -1.50       | 0.00 |
| <i>Cd81</i>                                | CD 81 antigen                                                                                                                           | 1416330 at                   | -1.50       | 0.00 |
| <i>Tpcn1</i>                               | two pore channel 1                                                                                                                      | 1434930 at                   | -1.50       | 0.01 |
| <i>Prkca</i>                               | Protein kinase C, alpha                                                                                                                 | 1446598 at                   | -1.50       | 0.01 |
| <i>4930402E16Rik</i>                       | RIKEN cDNA 4930402E16 gene                                                                                                              | 1434480 at                   | -1.50       | 0.00 |
| <i>2610203C20Rik</i>                       | RIKEN cDNA 2610203C20 gene                                                                                                              | 1455160 at                   | -1.50       | 0.00 |
| <i>Zfp192</i>                              | zinc finger protein 192                                                                                                                 | 1455778 at                   | -1.50       | 0.00 |
| <i>Abib2</i>                               | ankyrin repeat and BTB (POZ) domain containing 2                                                                                        | 1433454 at                   | -1.50       | 0.01 |
| <i>6720462K09Rik</i>                       | RIKEN cDNA 6720462K09 gene                                                                                                              | 1456896 at                   | -1.50       | 0.00 |
| <i>Lsm14b</i>                              | LSM14 homolog B (SCD6, S. cerevisiae)                                                                                                   | 1455155 at                   | -1.50       | 0.00 |
| ---                                        | Transcribed locus                                                                                                                       | 1441389 at                   | -1.50       | 0.01 |
| <i>Ogt</i>                                 | O-linked N-acetylglucosamine (GlcNAc) transferase (UDP-N-acetylglucosamine:polypeptide-N-acetylglucosaminyl transferase)                | 1425517_s at                 | -1.50       | 0.00 |
| <i>Homer1</i>                              | homer homolog 1 (Drosophila)                                                                                                            | 1439662 at                   | -1.50       | 0.00 |
| <i>Vegfb</i>                               | vascular endothelial growth factor B                                                                                                    | 1451803 a at                 | -1.50       | 0.00 |
| <i>Cysl1r1</i>                             | cysteinylnyl leukotriene receptor 1                                                                                                     | 1418944 at                   | -1.50       | 0.01 |
| <i>Snx5</i>                                | sorting nexin 5                                                                                                                         | 1417647 at                   | -1.50       | 0.00 |
| <i>Clqdc2</i>                              | Clq domain containing 2                                                                                                                 | 1417393 a at                 | -1.50       | 0.01 |
| <i>Fath /// LOC672128</i>                  | fat tumor suppressor homolog (Drosophila) /// similar to fat tumor suppressor homolog                                                   | 1433857 at                   | -1.50       | 0.00 |
| <i>Mmrn1</i>                               | multimerin 1                                                                                                                            | 1437260 at                   | -1.50       | 0.00 |
| <i>Igsf4a</i>                              | immunoglobulin superfamily, member 4A                                                                                                   | 1417377 at                   | -1.50       | 0.00 |
| <i>St3gal6</i>                             | ST3 beta-galactoside alpha-2,3-sialyltransferase 6                                                                                      | 1449079 s at                 | -1.50       | 0.00 |
| <i>Reps2</i>                               | RALBP1 associated Eps domain containing protein 2                                                                                       | 1435389 at                   | -1.50       | 0.00 |
| <i>BC034664</i>                            | cDNA sequence BC034664                                                                                                                  | 1455588 at                   | -1.50       | 0.00 |
| <i>Golga4</i>                              | golgi autoantigen, golgin subfamily a, 4                                                                                                | 1460213 at                   | -1.50       | 0.00 |
| <i>Wdr35</i>                               | WD repeat domain 35                                                                                                                     | 1454790 at                   | -1.50       | 0.00 |
| <i>Adm</i>                                 | adrenomedullin                                                                                                                          | 1416077 at                   | -1.51       | 0.01 |
| <i>Dusp22</i>                              | dual specificity phosphatase 22                                                                                                         | 1448985 at                   | -1.51       | 0.00 |
| <i>Tfrc</i>                                | transferrin receptor                                                                                                                    | AFFX-TransRecMur/X57349_3_at | -1.51       | 0.01 |
| <i>Myadm</i>                               | myeloid-associated differentiation marker                                                                                               | 1423321 at                   | -1.51       | 0.00 |
| <i>Tmem41b</i>                             | transmembrane protein 41B                                                                                                               | 1460122 at                   | -1.51       | 0.00 |
| <i>1110031B06Rik</i>                       | RIKEN cDNA 1110031B06 gene                                                                                                              | 1423745 at                   | -1.51       | 0.00 |
| <i>Ogt</i>                                 | O-linked N-acetylglucosamine (GlcNAc) transferase (UDP-N-acetylglucosamine:polypeptide-N-acetylglucosaminyl transferase)                | 1425516_at                   | -1.51       | 0.00 |
| <i>Sfrs14</i>                              | splicing factor, arginine/serine-rich 14                                                                                                | 1435798 a at                 | -1.51       | 0.00 |
| <i>Lmo2</i>                                | LIM domain only 2                                                                                                                       | 1454086 a at                 | -1.51       | 0.00 |
| <i>LOC432971</i>                           | hypothetical gene supported by AK038224                                                                                                 | 1446618 at                   | -1.51       | 0.01 |
| <i>Cttnb1</i>                              | catenin (cadherin associated protein), beta 1                                                                                           | 1420811 a at                 | -1.51       | 0.00 |
| <i>Rnf128</i>                              | ring finger protein 128                                                                                                                 | 1449036 at                   | -1.51       | 0.00 |
| <i>Pigo</i>                                | phosphatidylinositol glycan, class O                                                                                                    | 1438155 x at                 | -1.51       | 0.00 |
| <i>Zfp3</i>                                | zinc finger protein 3                                                                                                                   | 1439563 at                   | -1.51       | 0.01 |
| <i>2310040A07Rik</i>                       | RIKEN cDNA 2310040A07 gene                                                                                                              | 1428739 at                   | -1.51       | 0.00 |
| <i>Nfyc</i>                                | nuclear transcription factor-Y gamma                                                                                                    | 1448963 at                   | -1.51       | 0.00 |
| <i>Zfp597</i>                              | zinc finger protein 597                                                                                                                 | 1460589 at                   | -1.51       | 0.00 |
| <i>Dock6 /// LOC670024</i>                 | dedicator of cytokinesis 6 /// similar to Dedicator of cytokinesis protein 6                                                            | 1427240 at                   | -1.51       | 0.01 |
| <i>Nmnat1</i>                              | nicotinamide nucleotide adenyltransferase 1                                                                                             | 1425773 s at                 | -1.51       | 0.00 |
| <i>Pnck</i>                                | pregnancy upregulated non-ubiquitously expressed CaM kinase                                                                             | 1422711 a at                 | -1.51       | 0.00 |
| <i>Ppm1l</i>                               | protein phosphatase 1 (formerly 2C)-like                                                                                                | 1435699 at                   | -1.51       | 0.01 |
| <i>Nqo2</i>                                | NAD(P)H dehydrogenase, quinone 2                                                                                                        | 1455590 at                   | -1.51       | 0.00 |
| <i>Tln2</i>                                | talin 2                                                                                                                                 | 1435700 at                   | -1.51       | 0.00 |
| <i>Srpk2</i>                               | serine/arginine-rich protein specific kinase 2                                                                                          | 1448603 at                   | -1.51       | 0.00 |
| <i>Stk39</i>                               | serine/threonine kinase 39, STE20/SPS1 homolog (yeast)                                                                                  | 1419550 a at                 | -1.51       | 0.01 |
| ---                                        | Transcribed locus                                                                                                                       | 1444643 at                   | -1.51       | 0.00 |
| <i>Idh3a</i>                               | isocitrate dehydrogenase 3 (NAD+) alpha                                                                                                 | 1422500 at                   | -1.51       | 0.00 |

|                                    |                                                                                                                                         |              |       |      |
|------------------------------------|-----------------------------------------------------------------------------------------------------------------------------------------|--------------|-------|------|
| <i>Hnrph1</i>                      | heterogeneous nuclear ribonucleoprotein H1                                                                                              | 1415872 at   | -1.51 | 0.00 |
| <i>Mtr</i>                         | 5-methyltetrahydrofolate-homocysteine methyltransferase                                                                                 | 1439811 at   | -1.51 | 0.00 |
| <i>Vim</i>                         | vimentin                                                                                                                                | 1456292 a at | -1.51 | 0.01 |
| <i>Trio</i>                        | Triple functional domain (PTPRF interacting)                                                                                            | 1442248 at   | -1.51 | 0.00 |
| <i>6330416G13Rik</i>               | RIKEN cDNA 6330416G13 gene                                                                                                              | 1426315 a at | -1.51 | 0.00 |
| <i>Unc5b</i>                       | unc-5 homolog B (C. elegans)                                                                                                            | 1453269 at   | -1.51 | 0.00 |
| <i>Gna12</i>                       | guanine nucleotide binding protein, alpha 12                                                                                            | 1455008 at   | -1.51 | 0.00 |
| <i>Zdhhc2</i>                      | zinc finger, DHHC domain containing 2                                                                                                   | 1452656 at   | -1.51 | 0.00 |
| <i>1810049H13Rik</i>               | RIKEN cDNA 1810049H13 gene                                                                                                              | 1460254 at   | -1.51 | 0.00 |
| <i>A430106J12Rik</i>               | RIKEN cDNA A430106J12 gene                                                                                                              | 1436025 at   | -1.51 | 0.00 |
| ---                                | ---                                                                                                                                     | 1449505 at   | -1.51 | 0.00 |
| <i>2900024O10Rik</i>               | RIKEN cDNA 2900024O10 gene                                                                                                              | 1437261 at   | -1.51 | 0.00 |
| <i>Kif2a</i>                       | Kinesin family member 2A                                                                                                                | 1450053 at   | -1.51 | 0.00 |
| <i>Depdc6</i>                      | DEP domain containing 6                                                                                                                 | 1451348 at   | -1.51 | 0.00 |
| <i>Cyhr1</i>                       | cysteine and histidine rich 1                                                                                                           | 1435328 at   | -1.51 | 0.01 |
| <i>Za20d2</i>                      | zinc finger, A20 domain containing 2                                                                                                    | 1416083 at   | -1.51 | 0.00 |
| <i>Kcnt2</i>                       | Potassium channel, subfamily T, member 2                                                                                                | 1459971 at   | -1.51 | 0.00 |
| <i>Pdk2</i>                        | pyruvate dehydrogenase kinase, isoenzyme 2                                                                                              | 1448825 at   | -1.51 | 0.01 |
| <i>Igsf3</i>                       | immunoglobulin superfamily, member 3                                                                                                    | 1455048 at   | -1.51 | 0.01 |
| <i>Rnmt1</i>                       | RNA methyltransferase like 1                                                                                                            | 1428766 at   | -1.51 | 0.00 |
| <i>Mrg1</i>                        | myeloid ecotropic viral integration site-related gene 1                                                                                 | 1440091 at   | -1.51 | 0.01 |
| <i>Prkag2</i>                      | protein kinase, AMP-activated, gamma 2 non-catalytic subunit                                                                            | 1451140 s at | -1.51 | 0.00 |
| ---                                | Transcribed locus                                                                                                                       | 1434097 at   | -1.51 | 0.00 |
| <i>Pcmd1</i>                       | protein-L-isoaspartate (D-aspartate) O-methyltransferase domain containing 1                                                            | 1455388 at   | -1.51 | 0.00 |
| <i>A1317395</i>                    | expressed sequence A1317395                                                                                                             | 1425596 at   | -1.51 | 0.00 |
| <i>Mtap2</i>                       | microtubule-associated protein 2                                                                                                        | 1434194 at   | -1.51 | 0.00 |
| <i>Nrp2</i>                        | neuropilin 2                                                                                                                            | 1435349 at   | -1.52 | 0.00 |
| <i>3110050K21Rik</i>               | RIKEN cDNA 3110050K21 gene                                                                                                              | 1434894 at   | -1.52 | 0.00 |
| <i>Smad7</i>                       | MAD homolog 7 (Drosophila)                                                                                                              | 1423389 at   | -1.52 | 0.00 |
| <i>Arhgef3</i>                     | Rho guanine nucleotide exchange factor (GEF) 3                                                                                          | 1424250 a at | -1.52 | 0.00 |
| <i>Mrpl39</i>                      | mitochondrial ribosomal protein L39                                                                                                     | 1448909 a at | -1.52 | 0.00 |
| <i>Phf17</i>                       | PHD finger protein 17                                                                                                                   | 1452179 at   | -1.52 | 0.01 |
| <i>C330006A16Rik</i>               | RIKEN cDNA C330006A16 gene                                                                                                              | 1433618 at   | -1.52 | 0.00 |
| <i>Dock7</i>                       | dedicator of cytokinesis 7                                                                                                              | 1425315 at   | -1.52 | 0.00 |
| <i>Cdc37l1</i>                     | cell division cycle 37 homolog (S. cerevisiae)-like 1                                                                                   | 1417740 at   | -1.52 | 0.00 |
| <i>Rarg</i>                        | retinoic acid receptor, gamma                                                                                                           | 1419415 a at | -1.52 | 0.01 |
| <i>Adk</i>                         | adenosine kinase                                                                                                                        | 1438292 x at | -1.52 | 0.00 |
| <i>Kcnj8</i>                       | potassium inwardly-rectifying channel, subfamily J, member 8                                                                            | 1418142 at   | -1.52 | 0.00 |
| <i>Zfp39</i>                       | zinc finger protein 39                                                                                                                  | 1441198 at   | -1.52 | 0.00 |
| <i>Ski</i>                         | Sloan-Kettering viral oncogene homolog                                                                                                  | 1456547 at   | -1.52 | 0.01 |
| <i>Ankrd26</i>                     | ankyrin repeat domain 26                                                                                                                | 1436071 at   | -1.52 | 0.00 |
| <i>Pbx1 /// LOC676870</i>          | pre B-cell leukemia transcription factor 1 /// region containing RIKEN cDNA 2310056B04 gene; pre B-cell leukemia transcription factor 1 | 1425383_a_at | -1.52 | 0.00 |
| <i>Maoa</i>                        | monoamine oxidase A                                                                                                                     | 1442676 at   | -1.52 | 0.00 |
| ---                                | Transcribed locus                                                                                                                       | 1448095 at   | -1.52 | 0.00 |
| <i>Coq5</i>                        | coenzyme Q5 homolog, methyltransferase (yeast)                                                                                          | 1417264 at   | -1.52 | 0.00 |
| <i>Ubiad1</i>                      | UbiA prenyltransferase domain containing 1                                                                                              | 1424213 at   | -1.52 | 0.00 |
| <i>1700012G19Rik</i>               | RIKEN cDNA 1700012G19 gene                                                                                                              | 1428788 at   | -1.52 | 0.00 |
| <i>Fmod</i>                        | fibromodulin                                                                                                                            | 1437685 x at | -1.52 | 0.00 |
| <i>Zranb1</i>                      | zinc finger, RAN-binding domain containing 1                                                                                            | 1436228 at   | -1.52 | 0.00 |
| <i>4930535B03Rik</i>               | RIKEN cDNA 4930535B03 gene                                                                                                              | 1438028 at   | -1.52 | 0.00 |
| <i>Oxct1</i>                       | 3-oxoacid CoA transferase 1                                                                                                             | 1436750 a at | -1.52 | 0.00 |
| <i>Lgals7</i>                      | lectin, galactose binding, soluble 7                                                                                                    | 1436356 at   | -1.52 | 0.00 |
| <i>Zfhd1b</i>                      | zinc finger homeobox 1b                                                                                                                 | 1456389 at   | -1.52 | 0.00 |
| <i>Map3k5 /// LOC675366</i>        | mitogen activated protein kinase kinase kinase 5 /// similar to mitogen activated protein kinase kinase kinase 5                        | 1421340_at   | -1.52 | 0.00 |
| <i>Sfrs6</i>                       | splicing factor, arginine/serine-rich 6                                                                                                 | 1448454 at   | -1.52 | 0.00 |
| <i>Gsta4</i>                       | glutathione S-transferase, alpha 4                                                                                                      | 1416368 at   | -1.52 | 0.00 |
| <i>Gpr23</i>                       | G protein-coupled receptor 23                                                                                                           | 1439665 at   | -1.52 | 0.01 |
| <i>Tm7sf3</i>                      | transmembrane 7 superfamily member 3                                                                                                    | 1452664 a at | -1.52 | 0.00 |
| <i>Myh10</i>                       | myosin, heavy polypeptide 10, non-muscle                                                                                                | 1452740 at   | -1.52 | 0.00 |
| <i>Inpp1</i>                       | inositol polyphosphate phosphatase-like 1                                                                                               | 1460394 a at | -1.52 | 0.00 |
| <i>Acad11</i>                      | acyl-Coenzyme A dehydrogenase family, member 11                                                                                         | 1433545 s at | -1.52 | 0.00 |
| <i>Egals7</i>                      | lectin, galactose binding, soluble 7                                                                                                    | 1424594 at   | -1.52 | 0.00 |
| <i>Ric8b</i>                       | resistance to inhibitors of cholinesterase 8 homolog B (C. elegans)                                                                     | 1435096 at   | -1.52 | 0.00 |
| <i>Pigv</i>                        | phosphatidylinositol glycan, class Y                                                                                                    | 1428556 at   | -1.52 | 0.00 |
| <i>Mrps6</i>                       | mitochondrial ribosomal protein S6                                                                                                      | 1424440 at   | -1.52 | 0.00 |
| <i>Galc</i>                        | galactosylceramidase                                                                                                                    | 1452907 at   | -1.52 | 0.00 |
| <i>Mfl1</i>                        | myeloid leukemia factor 1                                                                                                               | 1418589 a at | -1.52 | 0.00 |
| <i>1110060D06Rik /// Dock5</i>     | RIKEN cDNA 1110060D06 gene /// dedicator of cytokinesis 5                                                                               | 1430291 at   | -1.52 | 0.00 |
| <i>Tmem38a</i>                     | transmembrane protein 38a                                                                                                               | 1424178 at   | -1.52 | 0.01 |
| <i>Lig4</i>                        | ligase IV, DNA, ATP-dependent                                                                                                           | 1439487 at   | -1.52 | 0.00 |
| <i>Pcyt2</i>                       | phosphate cytidylyltransferase 2, ethanolamine                                                                                          | 1420493 a at | -1.52 | 0.00 |
| <i>Ank1</i>                        | ankyrin 1, erythroid                                                                                                                    | 1419421 at   | -1.52 | 0.00 |
| <i>0610012G03Rik /// LOC638521</i> | RIKEN cDNA 0610012G03 gene /// hypothetical protein LOC638521                                                                           | 1448540 a at | -1.52 | 0.00 |
| <i>D930001I22Rik</i>               | RIKEN cDNA D930001I22 gene                                                                                                              | 1454935 at   | -1.52 | 0.00 |
| <i>Neur12</i>                      | neuronalized-like 2 (Drosophila)                                                                                                        | 1429141 at   | -1.52 | 0.00 |
| <i>Tanc2</i>                       | tetratricopeptide repeat, ankyrin repeat and coiled-coil containing 2                                                                   | 1435078 at   | -1.52 | 0.01 |
| <i>Wwtr1</i>                       | WW domain containing transcription regulator 1                                                                                          | 1417818 at   | -1.52 | 0.00 |
| <i>Csf1r</i>                       | colony stimulating factor 1 receptor                                                                                                    | 1419873 s at | -1.53 | 0.01 |
| <i>Usp2</i>                        | ubiquitin specific peptidase 2                                                                                                          | 1417169 at   | -1.53 | 0.01 |
| <i>Hbld2</i>                       | HESB like domain containing 2                                                                                                           | 1423651 at   | -1.53 | 0.00 |
| <i>Arpp19</i>                      | cAMP-regulated phosphoprotein 19                                                                                                        | 1450685 at   | -1.53 | 0.01 |
| <i>Tloc1</i>                       | translocation protein 1                                                                                                                 | 1455698 at   | -1.53 | 0.01 |
| <i>9130004J05Rik</i>               | RIKEN cDNA 9130004J05 gene                                                                                                              | 1430191 at   | -1.53 | 0.00 |
| <i>Grsf1</i>                       | G-rich RNA sequence binding factor 1                                                                                                    | 1437838 x at | -1.53 | 0.00 |
| <i>Mospd2</i>                      | motile sperm domain containing 2                                                                                                        | 1424124 at   | -1.53 | 0.00 |
| <i>Hdhd2</i>                       | haloacid dehalogenase-like hydrolase domain containing 2                                                                                | 1428507 at   | -1.53 | 0.00 |
| <i>Pcgf3</i>                       | polycomb group ring finger 3                                                                                                            | 1428423 at   | -1.53 | 0.00 |
| <i>Rgma</i>                        | RGM domain family, member A                                                                                                             | 1438241 at   | -1.53 | 0.00 |
| <i>Mbn1</i>                        | muscleblind-like 1 (Drosophila)                                                                                                         | 1416904 at   | -1.53 | 0.00 |
| <i>Dsp</i>                         | desmoplakin                                                                                                                             | 1435493 at   | -1.53 | 0.00 |
| <i>Rnf166</i>                      | ring finger protein 166                                                                                                                 | 1436906 at   | -1.53 | 0.00 |
| <i>Fbxl10</i>                      | F-box and leucine-rich repeat protein 10                                                                                                | 1459861 s at | -1.53 | 0.00 |
| <i>Stard4</i>                      | StAR-related lipid transfer (START) domain containing 4                                                                                 | 1455011 at   | -1.53 | 0.01 |
| <i>Ppp4r2</i>                      | protein phosphatase 4, regulatory subunit 2                                                                                             | 1433851 at   | -1.53 | 0.00 |
| <i>AW061290</i>                    | expressed sequence AW061290                                                                                                             | 1438036 x at | -1.53 | 0.00 |

|                                           |                                                                                                   |              |       |      |
|-------------------------------------------|---------------------------------------------------------------------------------------------------|--------------|-------|------|
| <i>Arfl4</i>                              | ADP-ribosylation factor 4-like                                                                    | 1418250 at   | -1.53 | 0.00 |
| <i>Podxl2</i>                             | podocalyxin-like 2                                                                                | 1455622 at   | -1.53 | 0.00 |
| <i>2610021A01Rik</i> /// <i>LOC668572</i> | RIKEN cDNA 2610021A01 gene /// similar to zinc finger protein 347                                 | 1438786 a at | -1.53 | 0.01 |
| <i>Zbib12</i>                             | zinc finger and BTB domain containing 12                                                          | 1436382 at   | -1.53 | 0.01 |
| <i>Hspb8</i>                              | heat shock protein 8                                                                              | 1417013 at   | -1.53 | 0.00 |
| <i>Rcor3</i>                              | REST corepressor 3                                                                                | 1425352 at   | -1.53 | 0.00 |
| <i>Ndufab1</i>                            | NADH dehydrogenase (ubiquinone) 1, alpha/beta subcomplex, 1                                       | 1453565 at   | -1.53 | 0.01 |
| <i>Sema3d</i>                             | sema domain, immunoglobulin domain (Ig), short basic domain, secreted, (semaphorin) 3D            | 1429459 at   | -1.53 | 0.00 |
| <i>Sesn3</i>                              | sestrin 3                                                                                         | 1449303 at   | -1.53 | 0.00 |
| <i>5430419D17Rik</i> /// <i>LOC546006</i> | RIKEN cDNA 5430419D17 gene /// similar to deleted in malignant brain tumors 1 isoform c precursor | 1440645 at   | -1.53 | 0.00 |
| <i>Trmt5</i>                              | TRM5 tRNA methyltransferase 5 homolog ( <i>S. cerevisiae</i> )                                    | 1452086 at   | -1.53 | 0.00 |
| <i>Palld</i>                              | palladin, cytoskeletal associated protein                                                         | 1433768 at   | -1.53 | 0.00 |
| <i>Mrg1</i>                               | Myeloid ecotropic viral integration site-related gene 1                                           | 1443926 at   | -1.53 | 0.00 |
| <i>Rala</i>                               | v-ral simian leukemia viral oncogene homolog A (ras related)                                      | 1450870 at   | -1.53 | 0.00 |
| <i>C130009A20Rik</i>                      | RIKEN cDNA C130009A20 gene                                                                        | 1444109 at   | -1.53 | 0.00 |
| <i>Bcl7a</i>                              | B-cell CLL/lymphoma 7A                                                                            | 1428207 at   | -1.53 | 0.00 |
| <i>Hsp110</i>                             | heat shock protein 110                                                                            | 1425993 a at | -1.53 | 0.01 |
| ---                                       | ---                                                                                               | 1435380 at   | -1.53 | 0.00 |
| <i>Adam23</i>                             | a disintegrin and metallopeptidase domain 23                                                      | 1447946 at   | -1.53 | 0.00 |
| <i>Pum1</i>                               | pumilio 1 ( <i>Drosophila</i> )                                                                   | 1423117 at   | -1.53 | 0.00 |
| <i>Bpgm</i>                               | 2,3-bisphosphoglycerate mutase                                                                    | 1415865 s at | -1.53 | 0.01 |
| <i>Hes6</i>                               | hairy and enhancer of split 6 ( <i>Drosophila</i> )                                               | 1436050 x at | -1.53 | 0.00 |
| <i>Wnk2</i>                               | WNK lysine deficient protein kinase 2                                                             | 1453355 at   | -1.53 | 0.01 |
| <i>Stard7</i>                             | START domain containing 7                                                                         | 1449628 s at | -1.53 | 0.00 |
| <i>Hexb</i>                               | hexosaminidase B                                                                                  | 1437874 s at | -1.53 | 0.01 |
| <i>Dpp4</i>                               | dipeptidylpeptidase 4                                                                             | 1459973 x at | -1.53 | 0.00 |
| <i>Letm1</i>                              | leucine zipper-EF-hand containing transmembrane protein 1                                         | 1420826 at   | -1.53 | 0.00 |
| <i>Ank2</i>                               | ankyrin 2, brain                                                                                  | 1434264 at   | -1.54 | 0.00 |
| <i>Ptgfrn</i>                             | prostaglandin F2 receptor negative regulator                                                      | 1434891 at   | -1.54 | 0.00 |
| <i>Bola3</i>                              | bolA-like 3 ( <i>E. coli</i> )                                                                    | 1433970 at   | -1.54 | 0.00 |
| <i>Adcyap1r1</i>                          | adenylate cyclase activating polypeptide 1 receptor 1                                             | 1429022 at   | -1.54 | 0.00 |
| <i>Cdc42ep3</i>                           | CDC42 effector protein (Rho GTPase binding) 3                                                     | 1450700 at   | -1.54 | 0.00 |
| <i>Atp2a2</i>                             | ATPase, Ca++ transporting, cardiac muscle, slow twitch 2                                          | 1427251 at   | -1.54 | 0.01 |
| <i>Bicd2</i>                              | bicaudal D homolog 2 ( <i>Drosophila</i> )                                                        | 1437875 at   | -1.54 | 0.00 |
| <i>Tdrd3</i>                              | tudor domain containing 3                                                                         | 1434869 at   | -1.54 | 0.00 |
| <i>Enpp2</i>                              | ectonucleotide pyrophosphatase/phosphodiesterase 2                                                | 1448136 at   | -1.54 | 0.01 |
| <i>Ctmb1</i>                              | catenin (cadherin associated protein), beta 1                                                     | 1450008 a at | -1.54 | 0.00 |
| <i>Wdr6</i>                               | WD repeat domain 6                                                                                | 1455940 x at | -1.54 | 0.00 |
| <i>Apbb1</i>                              | amyloid beta (A4) precursor protein-binding, family B, member 1                                   | 1423893 x at | -1.54 | 0.01 |
| ---                                       | ---                                                                                               | 1424746 at   | -1.54 | 0.00 |
| <i>Mrpl51</i>                             | mitochondrial ribosomal protein L51                                                               | 1416879 at   | -1.54 | 0.01 |
| ---                                       | ---                                                                                               | 1434243 s at | -1.54 | 0.00 |
| <i>Reln</i>                               | reelin                                                                                            | 1449465 at   | -1.54 | 0.00 |
| <i>Trip11</i>                             | thyroid hormone receptor interactor 11                                                            | 1427406 at   | -1.54 | 0.00 |
| <i>Ptprs</i>                              | protein tyrosine phosphatase, receptor type, S                                                    | 1426794 at   | -1.54 | 0.00 |
| <i>Tm9sf3</i>                             | transmembrane 9 superfamily member 3                                                              | 1428412 at   | -1.54 | 0.00 |
| <i>Zfp306</i>                             | zinc finger protein 306                                                                           | 1422551 at   | -1.54 | 0.00 |
| <i>Clqmf7</i>                             | Clq and tumor necrosis factor related protein 7                                                   | 1460163 at   | -1.54 | 0.00 |
| <i>Egln1</i>                              | EGL nine homolog 1 ( <i>C. elegans</i> )                                                          | 1423785 at   | -1.54 | 0.00 |
| <i>Wnk1</i>                               | WNK lysine deficient protein kinase 1                                                             | 1433676 at   | -1.54 | 0.00 |
| <i>5730403B10Rik</i>                      | RIKEN cDNA 5730403B10 gene                                                                        | 1460172 at   | -1.54 | 0.00 |
| <i>Csrp1</i>                              | cysteine and glycine-rich protein 1                                                               | 1425811 a at | -1.54 | 0.00 |
| <i>Ank2</i>                               | ankyrin 2, brain                                                                                  | 1434265 s at | -1.54 | 0.00 |
| <i>Mef2a</i>                              | myocyte enhancer factor 2A                                                                        | 1421252 a at | -1.54 | 0.00 |
| <i>Tic3</i>                               | tetratricopeptide repeat domain 3                                                                 | 1441684 at   | -1.54 | 0.00 |
| <i>Reep5</i>                              | Receptor accessory protein 5                                                                      | 1442128 at   | -1.54 | 0.00 |
| <i>Fut11</i>                              | fucosyltransferase 11                                                                             | 1437748 at   | -1.54 | 0.00 |
| <i>Ppfbp2</i>                             | protein tyrosine phosphatase, receptor-type, F interacting protein, binding protein 2             | 1417801 a at | -1.54 | 0.00 |
| <i>D9Erd256e</i>                          | DNA segment, Chr 9, ERATO Doi 256, expressed                                                      | 1459326 at   | -1.54 | 0.00 |
| <i>Dach1</i>                              | dachshund 1 ( <i>Drosophila</i> )                                                                 | 1433743 at   | -1.54 | 0.00 |
| <i>Satb1</i>                              | special AT-rich sequence binding protein 1                                                        | 1416007 at   | -1.54 | 0.00 |
| <i>Rilp</i>                               | Rab interacting lysosomal protein                                                                 | 1457696 at   | -1.55 | 0.01 |
| <i>2700049H19Rik</i>                      | RIKEN cDNA 2700049H19 gene                                                                        | 1427113 s at | -1.55 | 0.00 |
| <i>4833426J09Rik</i>                      | RIKEN cDNA 4833426J09 gene                                                                        | 1428996 at   | -1.55 | 0.01 |
| <i>0610009K11Rik</i>                      | RIKEN cDNA 0610009K11 gene                                                                        | 1434118 at   | -1.55 | 0.00 |
| <i>Ncbp2</i>                              | nuclear cap binding protein subunit 2                                                             | 1423045 at   | -1.55 | 0.01 |
| <i>Cables2</i>                            | Cdk5 and Abl enzyme substrate 2                                                                   | 1452307 at   | -1.55 | 0.00 |
| <i>Slc37a4</i>                            | solute carrier family 37 (glycerol-6-phosphate transporter), member 4                             | 1417042 at   | -1.55 | 0.00 |
| <i>Vldlr</i>                              | very low density lipoprotein receptor                                                             | 1435893 at   | -1.55 | 0.01 |
| <i>Abcc8</i>                              | ATP-binding cassette, sub-family C (CFTR/MRP), member 8                                           | 1455765 a at | -1.55 | 0.01 |
| <i>B230380D07Rik</i>                      | RIKEN cDNA B230380D07 gene                                                                        | 1436841 at   | -1.55 | 0.00 |
| <i>1110002B05Rik</i>                      | RIKEN cDNA 1110002B05 gene                                                                        | 1448388 a at | -1.55 | 0.00 |
| <i>Itp1</i>                               | Inositol 1,4,5-triphosphate receptor 1                                                            | 1457189 at   | -1.55 | 0.00 |
| <i>Pura</i>                               | purine rich element binding protein A                                                             | 1420628 at   | -1.55 | 0.00 |
| <i>Socs5</i>                              | suppressor of cytokine signaling 5                                                                | 1423350 at   | -1.55 | 0.00 |
| <i>Bgn</i>                                | biglycan                                                                                          | 1448323 a at | -1.55 | 0.01 |
| <i>Clec3b</i>                             | C-type lectin domain family 3, member b                                                           | 1449466 at   | -1.55 | 0.01 |
| <i>Lrp6</i>                               | low density lipoprotein receptor-related protein 6                                                | 1451022 at   | -1.55 | 0.00 |
| <i>Pum1</i>                               | pumilio 1 ( <i>Drosophila</i> )                                                                   | 1456054 a at | -1.55 | 0.00 |
| <i>Laptm4b</i>                            | lysosomal-associated protein transmembrane 4B                                                     | 1416148 at   | -1.55 | 0.00 |
| <i>Col8a1</i>                             | procollagen, type VIII, alpha 1                                                                   | 1447819 x at | -1.55 | 0.00 |
| <i>Pp11r</i>                              | placental protein 11 related                                                                      | 1449937 at   | -1.55 | 0.00 |
| <i>AA409368</i>                           | expressed sequence AA409368                                                                       | 1457466 at   | -1.55 | 0.00 |
| <i>Seca</i>                               | sarcoglycan, alpha (dystrophin-associated glycoprotein)                                           | 1422654 at   | -1.55 | 0.00 |
| <i>E2f6</i>                               | E2F transcription factor 6                                                                        | 1448835 at   | -1.55 | 0.00 |
| <i>B130021B11Rik</i>                      | RIKEN cDNA B130021B11 gene                                                                        | 1438989 s at | -1.55 | 0.00 |
| <i>Dct</i>                                | dopachrome tautomerase                                                                            | 1418028 at   | -1.55 | 0.00 |
| <i>Srf</i>                                | serum response factor                                                                             | 1418255 s at | -1.55 | 0.00 |
| <i>Rnf11</i>                              | ring finger protein 11                                                                            | 1452058 a at | -1.55 | 0.00 |
| <i>Ephb3</i>                              | Eph receptor B3                                                                                   | 1451550 at   | -1.55 | 0.01 |
| <i>Zbtb20</i>                             | zinc finger and BTB domain containing 20                                                          | 1422064 at   | -1.55 | 0.00 |
| <i>1700034H14Rik</i>                      | RIKEN cDNA 1700034H14 gene                                                                        | 1452785 at   | -1.55 | 0.00 |
| <i>A430106J12Rik</i>                      | RIKEN cDNA A430106J12 gene                                                                        | 1437216 at   | -1.55 | 0.00 |
| <i>Tmem109</i>                            | transmembrane protein 109                                                                         | 1456057 x at | -1.55 | 0.00 |
| <i>Asb15</i>                              | ankyrin repeat and SOCS box-containing protein 15                                                 | 1460281 at   | -1.55 | 0.00 |

|                             |                                                                                                                                           |              |       |      |
|-----------------------------|-------------------------------------------------------------------------------------------------------------------------------------------|--------------|-------|------|
| <i>Glrx5</i>                | glutaredoxin 5 homolog ( <i>S. cerevisiae</i> )                                                                                           | 1428553 at   | -1.55 | 0.00 |
| ---                         | Adult male corpora quadrigenina cDNA, RIKEN full-length enriched library, clone: B230209O07 product: unclassifiable, full insert sequence | 1436096_at   | -1.55 | 0.00 |
| <i>Bgn</i>                  | biglycan                                                                                                                                  | 1416405 at   | -1.55 | 0.01 |
| <i>Itsn1</i>                | intersectin 1 (SH3 domain protein 1A)                                                                                                     | 1452338 s at | -1.55 | 0.00 |
| <i>Smpd1</i>                | sphingomyelin phosphodiesterase 1, acid lysosomal                                                                                         | 1447874 x at | -1.55 | 0.00 |
| <i>Sdc2</i>                 | syndecan 2                                                                                                                                | 1417011 at   | -1.56 | 0.00 |
| <i>LOC552912</i>            | hypothetical LOC552912                                                                                                                    | 1456499 at   | -1.56 | 0.00 |
| <i>4930402E16Rik</i>        | RIKEN cDNA 4930402E16 gene                                                                                                                | 1459869 x at | -1.56 | 0.00 |
| <i>Dynll2</i>               | dynein light chain LC8-type 2                                                                                                             | 1418371 at   | -1.56 | 0.00 |
| ---                         | ---                                                                                                                                       | 1436138 at   | -1.56 | 0.00 |
| <i>AA536717</i>             | expressed sequence AA536717                                                                                                               | 1435686 at   | -1.56 | 0.00 |
| <i>Tmem109</i>              | transmembrane protein 109                                                                                                                 | 1437008 x at | -1.56 | 0.00 |
| <i>Vapb</i>                 | vesicle-associated membrane protein, associated protein B and C                                                                           | 1436079 s at | -1.56 | 0.00 |
| ---                         | ---                                                                                                                                       | 1430245 at   | -1.56 | 0.00 |
| <i>Maf</i>                  | avian musculoaponeurotic fibrosarcoma (v-maf) AS42 oncogene homolog                                                                       | 1458600 at   | -1.56 | 0.01 |
| <i>5730494M16Rik</i>        | RIKEN cDNA 5730494M16 gene                                                                                                                | 1441960 x at | -1.56 | 0.01 |
| <i>Nav1</i>                 | Neuron navigator 1                                                                                                                        | 1446497 at   | -1.56 | 0.00 |
| <i>Sez6l2</i>               | seizure related 6 homolog like 2                                                                                                          | 1434641 x at | -1.56 | 0.00 |
| <i>5730405O12Rik</i>        | RIKEN cDNA 5730405O12 gene                                                                                                                | 1432843 at   | -1.56 | 0.01 |
| <i>Enpp3</i>                | ectonucleotide pyrophosphatase/phosphodiesterase 3                                                                                        | 1427302 at   | -1.56 | 0.00 |
| <i>Esrra</i>                | estrogen related receptor, alpha                                                                                                          | 1460652 at   | -1.56 | 0.00 |
| <i>Ankrd12</i>              | Ankyrin repeat domain 12                                                                                                                  | 1447165 at   | -1.56 | 0.00 |
| <i>Luc7l2</i>               | LUC7-like 2 ( <i>S. cerevisiae</i> )                                                                                                      | 1436767 at   | -1.56 | 0.00 |
| <i>Dnm1l</i>                | dynamitin 1-like                                                                                                                          | 1428086 at   | -1.56 | 0.00 |
| <i>1810021J13Rik</i>        | RIKEN cDNA 1810021J13 gene                                                                                                                | 1417174 at   | -1.56 | 0.00 |
| <i>Atxn1</i>                | ataxin 1                                                                                                                                  | 1438294 at   | -1.56 | 0.00 |
| <i>Zbtb20</i>               | zinc finger and BTB domain containing 20                                                                                                  | 1437598 at   | -1.56 | 0.00 |
| <i>Cvcs</i>                 | cytochrome c, somatic                                                                                                                     | 1445484 at   | -1.56 | 0.00 |
| <i>Senp7</i>                | SUMO1/sentrin specific peptidase 7                                                                                                        | 1438413 at   | -1.56 | 0.00 |
| <i>Ppp2r5c</i>              | protein phosphatase 2, regulatory subunit B (B56), gamma isoform                                                                          | 1434206 s at | -1.56 | 0.00 |
| <i>Cebpa</i>                | CCAAT/enhancer binding protein (C/EBP), alpha                                                                                             | 1418982 at   | -1.56 | 0.00 |
| <i>BC018601</i>             | cDNA sequence BC018601                                                                                                                    | 1460399 at   | -1.56 | 0.00 |
| <i>Atxn1</i>                | Ataxin 1                                                                                                                                  | 1445695 at   | -1.56 | 0.00 |
| <i>Mccc2</i>                | methylcrotonoyl-Coenzyme A carboxylase 2 (beta)                                                                                           | 1454840 at   | -1.56 | 0.00 |
| <i>Rora</i>                 | RAR-related orphan receptor alpha                                                                                                         | 1436326 at   | -1.56 | 0.00 |
| <i>Gdpd5</i>                | glycerophosphodiester phosphodiesterase domain containing 5                                                                               | 1424150 at   | -1.56 | 0.00 |
| <i>P2ry14</i>               | purinergic receptor P2Y, G-protein coupled, 14                                                                                            | 1424733 at   | -1.56 | 0.00 |
| <i>Mtx3</i>                 | metaxin 3                                                                                                                                 | 1434807 s at | -1.56 | 0.00 |
| <i>Arhgap12</i>             | Rho GTPase activating protein 12                                                                                                          | 1451525 at   | -1.56 | 0.00 |
| <i>Jarid2</i>               | jumonji, AT rich interactive domain 2                                                                                                     | 1422698 s at | -1.56 | 0.00 |
| <i>Sox17</i>                | SRY-box containing gene 17                                                                                                                | 1421657 a at | -1.56 | 0.00 |
| <i>Ms4a1</i>                | membrane-spanning 4-domains, subfamily A, member 1                                                                                        | 1423226 at   | -1.56 | 0.00 |
| <i>Grsf1</i>                | G-rich RNA sequence binding factor 1                                                                                                      | 1433824 x at | -1.56 | 0.00 |
| <i>Ccdc85a</i>              | coiled-coil domain containing 85A                                                                                                         | 1427157 at   | -1.56 | 0.00 |
| <i>Pstk</i>                 | phosphoseryl-tRNA kinase                                                                                                                  | 1455953 x at | -1.56 | 0.00 |
| <i>Manea</i>                | mannosidase, endo-alpha                                                                                                                   | 1455403 at   | -1.56 | 0.00 |
| <i>Phldb1</i>               | pleckstrin homology-like domain, family B, member 1                                                                                       | 1424467 at   | -1.56 | 0.00 |
| <i>Armc1</i>                | armadillo repeat containing 1                                                                                                             | 1415719 s at | -1.56 | 0.00 |
| <i>Stard8</i>               | START domain containing 8                                                                                                                 | 1427072 at   | -1.56 | 0.01 |
| <i>Lims1</i>                | LIM and senescent cell antigen-like domains 1                                                                                             | 1443947 at   | -1.57 | 0.00 |
| <i>Mfn1</i>                 | mitofusin 1                                                                                                                               | 1449697 s at | -1.57 | 0.00 |
| <i>Srd5a2l2</i>             | steroid 5 alpha-reductase 2-like 2                                                                                                        | 1437482 at   | -1.57 | 0.00 |
| <i>Coq10a</i>               | coenzyme Q10 homolog A (yeast)                                                                                                            | 1433628 at   | -1.57 | 0.00 |
| <i>Aprin</i>                | androgen-induced proliferation inhibitor                                                                                                  | 1436161 at   | -1.57 | 0.00 |
| <i>2900046L07Rik</i>        | RIKEN cDNA 2900046L07 gene                                                                                                                | 1432944 at   | -1.57 | 0.01 |
| <i>B930012P20Rik</i>        | RIKEN cDNA B930012P20 gene                                                                                                                | 1457802 at   | -1.57 | 0.01 |
| <i>Nox4</i>                 | NADPH oxidase 4                                                                                                                           | 1451827 a at | -1.57 | 0.00 |
| <i>Sfrp1</i>                | secreted frizzled-related sequence protein 1                                                                                              | 1428136 at   | -1.57 | 0.00 |
| <i>LOC676870</i>            | region containing RIKEN cDNA 2310056B04 gene; pre B-cell leukemia transcription factor 1                                                  | 1428646_at   | -1.57 | 0.00 |
| <i>Trdn</i>                 | triadin                                                                                                                                   | 1451801 at   | -1.57 | 0.00 |
| <i>1810063B05Rik</i>        | RIKEN cDNA 1810063B05 gene                                                                                                                | 1435864 a at | -1.57 | 0.00 |
| <i>Laptm4b</i>              | lysosomal-associated protein transmembrane 4B                                                                                             | 1436915 x at | -1.57 | 0.00 |
| <i>Chchd3</i>               | coiled-coil-helix-coiled-coil-helix domain containing 3                                                                                   | 1431241 at   | -1.57 | 0.00 |
| <i>Stox2</i>                | storkhead box 2                                                                                                                           | 1447624 s at | -1.57 | 0.00 |
| <i>Fez1</i>                 | fasciculation and elongation protein zeta 1 (zygin 1)                                                                                     | 1454674 at   | -1.57 | 0.00 |
| <i>Cpox</i>                 | coproporphyrinogen oxidase                                                                                                                | 1422493 at   | -1.57 | 0.01 |
| <i>B230208H17Rik</i>        | RIKEN cDNA B230208H17 gene                                                                                                                | 1452370 s at | -1.57 | 0.00 |
| ---                         | ---                                                                                                                                       | 1434886 at   | -1.57 | 0.00 |
| <i>Ctsh</i>                 | cathepsin H                                                                                                                               | 1443814 x at | -1.57 | 0.00 |
| <i>B3galtl</i>              | beta 1,3-galactosyltransferase-like                                                                                                       | 1457043 at   | -1.57 | 0.00 |
| <i>Actc1</i>                | actin, alpha, cardiac                                                                                                                     | 1415927 at   | -1.57 | 0.00 |
| <i>Irx5</i>                 | Iroquois related homeobox 5 ( <i>Drosophila</i> )                                                                                         | 1421072 at   | -1.57 | 0.00 |
| <i>Lamb1-1</i>              | laminin B1 subunit 1                                                                                                                      | 1424113 at   | -1.57 | 0.01 |
| <i>Hrc</i>                  | histidine rich calcium binding protein                                                                                                    | 1419109 at   | -1.57 | 0.00 |
| <i>Hnrph3 /// LOC669773</i> | heterogeneous nuclear ribonucleoprotein H3 /// similar to heterogeneous nuclear ribonucleoprotein H3 isoform a                            | 1455491_at   | -1.57 | 0.00 |
| <i>Ppapdc3</i>              | Phosphatidic acid phosphatase type 2 domain containing 3                                                                                  | 1442592 at   | -1.57 | 0.01 |
| <i>4732415M23Rik</i>        | RIKEN cDNA 4732415M23 gene                                                                                                                | 1435365 at   | -1.57 | 0.00 |
| <i>Tspan2</i>               | tetraspanin 2                                                                                                                             | 1432417 a at | -1.57 | 0.00 |
| <i>Pde4a</i>                | phosphodiesterase 4A, cAMP specific                                                                                                       | 1421535 a at | -1.57 | 0.00 |
| <i>Kif13a</i>               | kinesin family member 13A                                                                                                                 | 1451890 at   | -1.57 | 0.00 |
| <i>Mef2a</i>                | myocyte enhancer factor 2A                                                                                                                | 1427185 at   | -1.57 | 0.00 |
| <i>Emil1 /// LOC634102</i>  | echinoderm microtubule associated protein like 1 /// similar to echinoderm microtubule associated protein like 1                          | 1428321_at   | -1.57 | 0.00 |
| <i>A1428795</i>             | expressed sequence A1428795                                                                                                               | 1435456 at   | -1.57 | 0.00 |
| <i>Prpf19</i>               | PRP19/PSO4 pre-mRNA processing factor 19 homolog ( <i>S. cerevisiae</i> )                                                                 | 1419839 x at | -1.57 | 0.00 |
| <i>Grsf1</i>                | G-rich RNA sequence binding factor 1                                                                                                      | 1433457 s at | -1.57 | 0.00 |
| <i>Zfp28</i>                | zinc finger protein 28                                                                                                                    | 1439503 at   | -1.57 | 0.00 |
| <i>Unc5b</i>                | unc-5 homolog B ( <i>C. elegans</i> )                                                                                                     | 1435110 at   | -1.57 | 0.00 |
| <i>2310004L02Rik</i>        | RIKEN cDNA 2310004L02 gene                                                                                                                | 1416775 at   | -1.57 | 0.00 |
| <i>Rhobtb3</i>              | Rho-related BTB domain containing 3                                                                                                       | 1447869 x at | -1.57 | 0.01 |
| <i>Serpini1</i>             | serine (or cysteine) peptidase inhibitor, clade I, member 1                                                                               | 1448443 at   | -1.57 | 0.00 |
| <i>Jam2</i>                 | junction adhesion molecule 2                                                                                                              | 1431416 a at | -1.57 | 0.00 |
| <i>A1591476</i>             | Expressed sequence A1591476                                                                                                               | 1440439 at   | -1.57 | 0.00 |
| <i>Hnt</i>                  | neurotrimin                                                                                                                               | 1426283 at   | -1.57 | 0.00 |

|                      |                                                                                                                                                     |              |       |      |
|----------------------|-----------------------------------------------------------------------------------------------------------------------------------------------------|--------------|-------|------|
| <i>Pex1</i>          | peroxisome biogenesis factor 1                                                                                                                      | 1428716 at   | -1.57 | 0.00 |
| ---                  | ---                                                                                                                                                 | 1444480 at   | -1.58 | 0.00 |
| <i>Nptn</i>          | neuroplastin                                                                                                                                        | 1415821 at   | -1.58 | 0.00 |
| <i>Trim35</i>        | tripartite motif-containing 35                                                                                                                      | 1454650 at   | -1.58 | 0.00 |
| <i>Ogt</i>           | O-linked N-acetylglucosamine (GlcNAc) transferase (UDP-N-acetylglucosamine:polypeptide-N-acetylglucosaminyl transferase)                            | 1460631_at   | -1.58 | 0.00 |
| <i>Ugp2</i>          | UDP-glucose pyrophosphorylase 2                                                                                                                     | 1426460 a at | -1.58 | 0.00 |
| <i>Zfp161</i>        | zinc finger protein 161                                                                                                                             | 1420865 at   | -1.58 | 0.00 |
| <i>Spred2</i>        | Sprouty-related, EVH1 domain containing 2                                                                                                           | 1441415 at   | -1.58 | 0.00 |
| <i>Hod</i>           | homeobox only domain                                                                                                                                | 1428662 a at | -1.58 | 0.00 |
| <i>Prpf19</i>        | PRP19/PSO4 pre-mRNA processing factor 19 homolog (S. cerevisiae)                                                                                    | 1449635 at   | -1.58 | 0.00 |
| <i>Clstn1</i>        | calysntenin 1                                                                                                                                       | 1421861 at   | -1.58 | 0.00 |
| <i>Apln</i>          | apelin                                                                                                                                              | 1451038 at   | -1.58 | 0.00 |
| <i>Ugp2</i>          | UDP-glucose pyrophosphorylase 2                                                                                                                     | 1426461 at   | -1.58 | 0.00 |
| <i>Ranbp6</i>        | RAN binding protein 6                                                                                                                               | 1435167 at   | -1.58 | 0.00 |
| <i>Agpat5</i>        | 1-acylglycerol-3-phosphate O-acyltransferase 5 (lysophosphatidic acid acyltransferase, epsilon)                                                     | 1434287_at   | -1.58 | 0.00 |
| <i>Cbfa2l3h</i>      | core-binding factor, runt domain, alpha subunit 2, translocated to, 3 homolog (human)                                                               | 1418582 at   | -1.58 | 0.01 |
| <i>6530418L21Rik</i> | RIKEN cDNA 6530418L21 gene                                                                                                                          | 1444723 at   | -1.58 | 0.00 |
| <i>Cog6</i>          | component of oligomeric golgi complex 6                                                                                                             | 1426216 at   | -1.58 | 0.00 |
| <i>D9Erd720e</i>     | DNA segment, Chr 9, ERATO Doi 720, expressed                                                                                                        | 1457776 at   | -1.58 | 0.00 |
| <i>Palld</i>         | palladin, cytoskeletal associated protein                                                                                                           | 1427228 at   | -1.58 | 0.00 |
| <i>Lphn1</i>         | latrophilin 1                                                                                                                                       | 1428510 at   | -1.58 | 0.00 |
| ---                  | NOD-derived CD11c +ve dendritic cells cDNA, RIKEN full-length enriched library, clone:F630119A15 product:hypothetical protein, full insert sequence | 1434451_at   | -1.58 | 0.00 |
| <i>Ppm1b</i>         | protein phosphatase 1B, magnesium dependent, beta isoform                                                                                           | 1426382 at   | -1.58 | 0.00 |
| <i>Evi1</i>          | ecotropic viral integration site 1                                                                                                                  | 1438325 at   | -1.58 | 0.01 |
| <i>Plscr4</i>        | phospholipid scramblase 4                                                                                                                           | 1443406 at   | -1.58 | 0.01 |
| <i>Atp2a2</i>        | ATPase, Ca++ transporting, cardiac muscle, slow twitch 2                                                                                            | 1427250 at   | -1.58 | 0.00 |
| <i>Mef2a</i>         | myocyte enhancer factor 2A                                                                                                                          | 1427186 a at | -1.58 | 0.00 |
| <i>Afmid</i>         | arylfornamidase                                                                                                                                     | 1452944 at   | -1.58 | 0.00 |
| <i>Prkar2b</i>       | protein kinase, cAMP dependent regulatory, type II beta                                                                                             | 1456475 s at | -1.58 | 0.00 |
| <i>Nipa1</i>         | non imprinted in Prader-Willi/Angelman syndrome 1 homolog (human)                                                                                   | 1434864 at   | -1.58 | 0.00 |
| <i>Hdac2</i>         | histone deacetylase 2                                                                                                                               | 1445684 s at | -1.58 | 0.00 |
| <i>2510005D08Rik</i> | RIKEN cDNA 2510005D08 gene                                                                                                                          | 1418386 at   | -1.58 | 0.00 |
| <i>Emcn</i>          | endomucin                                                                                                                                           | 1425582 a at | -1.58 | 0.00 |
| <i>C330002I19Rik</i> | RIKEN cDNA C330002I19 gene                                                                                                                          | 1458528 at   | -1.58 | 0.00 |
| <i>Wyp1</i>          | WW domain containing E3 ubiquitin protein ligase 1                                                                                                  | 1427098 at   | -1.58 | 0.01 |
| <i>2310079P10Rik</i> | RIKEN cDNA 2310079P10 gene                                                                                                                          | 1428899 at   | -1.58 | 0.00 |
| <i>Aadacl1</i>       | arylacetamide deacetylase-like 1                                                                                                                    | 1455227 at   | -1.58 | 0.00 |
| <i>Abhd3</i>         | abhydrolase domain containing 3                                                                                                                     | 1417946 at   | -1.58 | 0.00 |
| <i>Tmem109</i>       | transmembrane protein 109                                                                                                                           | 1416032 at   | -1.58 | 0.00 |
| <i>Rasa1</i>         | RAS p21 protein activator 1                                                                                                                         | 1426477 at   | -1.58 | 0.00 |
| <i>Ywhaq</i>         | tyrosine 3-monoxygenase/tryptophan 5-monoxygenase activation protein, theta polypeptide                                                             | 1420829_a at | -1.58 | 0.00 |
| <i>2310039E09Rik</i> | RIKEN cDNA 2310039E09 gene                                                                                                                          | 1420551 at   | -1.59 | 0.00 |
| <i>Pip5k1a</i>       | phosphatidylinositol-4-phosphate 5-kinase, type 1 alpha                                                                                             | 1450389 s at | -1.59 | 0.00 |
| <i>Ankrd12</i>       | ankyrin repeat domain 12                                                                                                                            | 1440193 at   | -1.59 | 0.00 |
| <i>Pcdh17</i>        | protocadherin 17                                                                                                                                    | 1453070 at   | -1.59 | 0.00 |
| ---                  | Transcribed locus                                                                                                                                   | 1436570 at   | -1.59 | 0.00 |
| <i>Cpeb3</i>         | cytoplasmic polyadenylation element binding protein 3                                                                                               | 1445868 at   | -1.59 | 0.00 |
| <i>Zfp191</i>        | zinc finger protein 191                                                                                                                             | 1430650 at   | -1.59 | 0.01 |
| <i>A630051L19Rik</i> | RIKEN cDNA A630051L19 gene                                                                                                                          | 1455134 at   | -1.59 | 0.00 |
| <i>Tmem53</i>        | transmembrane protein 53                                                                                                                            | 1451479 a at | -1.59 | 0.00 |
| <i>Ints6</i>         | integrator complex subunit 6                                                                                                                        | 1423274 at   | -1.59 | 0.00 |
| <i>Mfhas1</i>        | malignant fibrous histiocytoma amplified sequence 1                                                                                                 | 1436897 at   | -1.59 | 0.00 |
| <i>Map3k4</i>        | mitogen activated protein kinase kinase kinase 4                                                                                                    | 1421450 a at | -1.59 | 0.00 |
| <i>Disp1</i>         | dispatched homolog 1 (Drosophila)                                                                                                                   | 1434795 at   | -1.59 | 0.00 |
| <i>Rnd3</i>          | Rho family GTPase 3                                                                                                                                 | 1416700 at   | -1.59 | 0.00 |
| <i>Tip1</i>          | tight junction protein 1                                                                                                                            | 1417749 a at | -1.59 | 0.00 |
| <i>Plxnb3</i>        | plexin B3                                                                                                                                           | 1440813 s at | -1.59 | 0.00 |
| <i>Foxp2</i>         | forkhead box P2                                                                                                                                     | 1438232 at   | -1.59 | 0.00 |
| <i>Zbtb20</i>        | zinc finger and BTB domain containing 20                                                                                                            | 1437065 at   | -1.59 | 0.00 |
| <i>Nrarp</i>         | Notch-regulated ankyrin repeat protein                                                                                                              | 1417986 at   | -1.59 | 0.00 |
| <i>Kdelc2</i>        | KDEL (Lys-Asp-Glu-Leu) containing 2                                                                                                                 | 1453071 s at | -1.59 | 0.00 |
| <i>Tnks2</i>         | tankyrase, TRF1-interacting ankyrin-related ADP-ribose polymerase 2                                                                                 | 1447522 s at | -1.59 | 0.00 |
| ---                  | ---                                                                                                                                                 | 1434115 at   | -1.59 | 0.00 |
| <i>Slc25a13</i>      | solute carrier family 25 (mitochondrial carrier, adenine nucleotide translocator), member 13                                                        | 1449481_at   | -1.59 | 0.00 |
| <i>Arnt2</i>         | Aryl hydrocarbon receptor nuclear translocator 2                                                                                                    | 1446894 at   | -1.59 | 0.00 |
| <i>Zfp597</i>        | zinc finger protein 597                                                                                                                             | 1435556 at   | -1.59 | 0.00 |
| <i>Mtif2</i>         | mitochondrial translational initiation factor 2                                                                                                     | 1415685 at   | -1.59 | 0.00 |
| <i>Bgn</i>           | biglycan                                                                                                                                            | 1437889 x at | -1.59 | 0.00 |
| <i>AW061290</i>      | expressed sequence AW061290                                                                                                                         | 1438035 at   | -1.59 | 0.00 |
| <i>Dscr6</i>         | Down syndrome critical region homolog 6 (human)                                                                                                     | 1420459 at   | -1.59 | 0.00 |
| <i>9430020K01Rik</i> | RIKEN cDNA 9430020K01 gene                                                                                                                          | 1428535 at   | -1.59 | 0.00 |
| <i>Rbpms2</i>        | RNA binding protein with multiple splicing 2                                                                                                        | 1424008 a at | -1.59 | 0.00 |
| <i>Acoi11</i>        | acyl-CoA thioesterase 11                                                                                                                            | 1429267 at   | -1.59 | 0.00 |
| <i>Kdr</i>           | kinase insert domain protein receptor                                                                                                               | 1449379 at   | -1.59 | 0.01 |
| <i>Klhl13</i>        | kelch-like 13 (Drosophila)                                                                                                                          | 1448269 a at | -1.59 | 0.01 |
| <i>MLL3</i>          | myeloid/lymphoid or mixed-lineage leukemia 3                                                                                                        | 1434178 at   | -1.59 | 0.00 |
| <i>A830073O21Rik</i> | RIKEN cDNA A830073O21 gene                                                                                                                          | 1434273 at   | -1.59 | 0.00 |
| <i>Pgam2</i>         | phosphoglycerate mutase 2                                                                                                                           | 1418373 at   | -1.59 | 0.00 |
| ---                  | ---                                                                                                                                                 | 1457894 at   | -1.59 | 0.01 |
| <i>Lysmd4</i>        | LysM, putative peptidoglycan-binding, domain containing 4                                                                                           | 1434093 at   | -1.59 | 0.00 |
| <i>Mrv1</i>          | MRV integration site 1                                                                                                                              | 1459665 s at | -1.59 | 0.01 |
| <i>Dnajb5</i>        | DnaJ (Hsp40) homolog, subfamily B, member 5                                                                                                         | 1421962 at   | -1.60 | 0.00 |
| <i>BC011209</i>      | cDNA sequence BC011209                                                                                                                              | 1424123 at   | -1.60 | 0.00 |
| <i>Mgat5</i>         | mannoside acetylglucosaminyltransferase 5                                                                                                           | 1428643 at   | -1.60 | 0.00 |
| <i>Xpo1</i>          | exportin 1, CRM1 homolog (yeast)                                                                                                                    | 1418442 at   | -1.60 | 0.00 |
| <i>Zfp128</i>        | zinc finger protein 128                                                                                                                             | 1458515 at   | -1.60 | 0.00 |
| <i>AW209491</i>      | expressed sequence AW209491                                                                                                                         | 1423512 at   | -1.60 | 0.00 |
| <i>Spred2</i>        | sprouty-related, EVH1 domain containing 2                                                                                                           | 1434403 at   | -1.60 | 0.00 |
| <i>Ogdh</i>          | oxoglutarate dehydrogenase (lipoamide)                                                                                                              | 1445632 at   | -1.60 | 0.01 |
| <i>Myh6</i>          | Myosin, heavy polypeptide 6, cardiac muscle, alpha                                                                                                  | 1458850 at   | -1.60 | 0.00 |
| <i>Nrk</i>           | Nik related kinase                                                                                                                                  | 1450079 at   | -1.60 | 0.00 |
| <i>2810482G21Rik</i> | RIKEN cDNA 2810482G21 gene                                                                                                                          | 1435754 at   | -1.60 | 0.00 |

|                                                                                                          |                                                                                                                                                                                     |              |       |      |
|----------------------------------------------------------------------------------------------------------|-------------------------------------------------------------------------------------------------------------------------------------------------------------------------------------|--------------|-------|------|
| <i>Ptger4</i>                                                                                            | prostaglandin E receptor 4 (subtype EP4)                                                                                                                                            | 1424208 at   | -1.60 | 0.01 |
| <i>Cks1b</i>                                                                                             | CDC28 protein kinase 1b                                                                                                                                                             | 1439514 at   | -1.60 | 0.00 |
| <i>Fxr1h</i>                                                                                             | fragile X mental retardation gene 1, autosomal homolog                                                                                                                              | 1452247 at   | -1.60 | 0.00 |
| <i>Cdc14a</i>                                                                                            | CDC14 cell division cycle 14 homolog A ( <i>S. cerevisiae</i> )                                                                                                                     | 1436913 at   | -1.60 | 0.00 |
| <i>Kcnb1</i> /// <i>Pascin2</i>                                                                          | potassium voltage gated channel, Shab-related subfamily, member 1 /// protein kinase C and casein kinase substrate in neurons 2                                                     | 1417810_a_at | -1.60 | 0.00 |
| ---                                                                                                      | ---                                                                                                                                                                                 | 1439500 at   | -1.60 | 0.00 |
| <i>Col5a1</i>                                                                                            | procollagen, type V, alpha 1                                                                                                                                                        | 1416740 at   | -1.60 | 0.01 |
| <i>Lrrtm3</i>                                                                                            | Leucine rich repeat transmembrane neuronal 3                                                                                                                                        | 1444477 at   | -1.60 | 0.00 |
| <i>Endog</i>                                                                                             | endonuclease G                                                                                                                                                                      | 1438317 a_at | -1.60 | 0.00 |
| <i>Asph</i>                                                                                              | aspartate-beta-hydroxylase                                                                                                                                                          | 1426015 s_at | -1.60 | 0.00 |
| ---                                                                                                      | Transcribed locus                                                                                                                                                                   | 1443847 x_at | -1.60 | 0.00 |
| <i>Rscad1</i>                                                                                            | radical S-adenosyl methionine domain containing 1                                                                                                                                   | 1440875 a_at | -1.60 | 0.00 |
| <i>Trio</i>                                                                                              | Triple functional domain (PTPRF interacting)                                                                                                                                        | 1457492 at   | -1.60 | 0.00 |
| <i>Jub</i>                                                                                               | ajuba                                                                                                                                                                               | 1421344 a_at | -1.60 | 0.00 |
| <i>Ches1</i>                                                                                             | checkpoint suppressor 1                                                                                                                                                             | 1434002 at   | -1.60 | 0.00 |
| <i>Ptprd</i>                                                                                             | protein tyrosine phosphatase, receptor type, D                                                                                                                                      | 1424886 at   | -1.60 | 0.01 |
| <i>Cox11</i>                                                                                             | COX11 homolog, cytochrome c oxidase assembly protein (yeast)                                                                                                                        | 1429188 at   | -1.60 | 0.00 |
| <i>Wdr33</i>                                                                                             | WD repeat domain 33                                                                                                                                                                 | 1455281 at   | -1.60 | 0.00 |
| <i>Ddit4l</i>                                                                                            | DNA-damage-inducible transcript 4-like                                                                                                                                              | 1439332 at   | -1.60 | 0.01 |
| <i>Ush1c</i>                                                                                             | Usher syndrome 1C homolog (human)                                                                                                                                                   | 1450001 a_at | -1.60 | 0.00 |
| <i>BC026657</i>                                                                                          | cDNA sequence BC026657                                                                                                                                                              | 1440064 at   | -1.60 | 0.00 |
| <i>Gpsn2</i>                                                                                             | glycoprotein, synaptic 2                                                                                                                                                            | 1429681 a_at | -1.60 | 0.00 |
| <i>Pex19</i>                                                                                             | peroxisome biogenesis factor 19                                                                                                                                                     | 1455208 at   | -1.60 | 0.00 |
| <i>Ankrd29</i>                                                                                           | ankyrin repeat domain 29                                                                                                                                                            | 1438756 at   | -1.60 | 0.00 |
| <i>Klhdc8a</i>                                                                                           | kelch domain containing 8A                                                                                                                                                          | 1441940 x_at | -1.60 | 0.00 |
| <i>Slc25a26</i>                                                                                          | solute carrier family 25 (mitochondrial carrier, phosphate carrier), member 26                                                                                                      | 1453886 a_at | -1.60 | 0.00 |
| ---                                                                                                      | ---                                                                                                                                                                                 | 1442470 at   | -1.60 | 0.00 |
| <i>Vtn</i>                                                                                               | vitronectin                                                                                                                                                                         | 1455098 a_at | -1.60 | 0.00 |
| <i>Krt1-10</i>                                                                                           | keratin complex 1, acidic, gene 10                                                                                                                                                  | 1452166 a_at | -1.60 | 0.00 |
| <i>Ankrd32</i>                                                                                           | ankyrin repeat domain 32                                                                                                                                                            | 1423577 at   | -1.60 | 0.00 |
| <i>Hefe2</i>                                                                                             | host cell factor C2                                                                                                                                                                 | 1438328 at   | -1.61 | 0.00 |
| <i>Slc12a7</i>                                                                                           | solute carrier family 12, member 7                                                                                                                                                  | 1418257 at   | -1.61 | 0.00 |
| <i>Nlk</i>                                                                                               | nemo like kinase                                                                                                                                                                    | 1419112 at   | -1.61 | 0.00 |
| <i>4833420G11Rik</i>                                                                                     | RIKEN cDNA 4833420G11 gene                                                                                                                                                          | 1455255 at   | -1.61 | 0.00 |
| <i>Msrb3</i>                                                                                             | methionine sulfoxide reductase B3                                                                                                                                                   | 1454997 at   | -1.61 | 0.00 |
| <i>Mrpl12</i>                                                                                            | mitochondrial ribosomal protein L12                                                                                                                                                 | 1452048 at   | -1.61 | 0.00 |
| <i>Car8</i>                                                                                              | carbonic anhydrase 8                                                                                                                                                                | 1457904 at   | -1.61 | 0.00 |
| <i>Scrn3</i>                                                                                             | secernin 3                                                                                                                                                                          | 1426917 s_at | -1.61 | 0.00 |
| <i>Spred2</i>                                                                                            | sprouty-related, EVH1 domain containing 2                                                                                                                                           | 1436892 at   | -1.61 | 0.00 |
| <i>Efcab2</i>                                                                                            | EF-hand calcium binding domain 2                                                                                                                                                    | 1420513 at   | -1.61 | 0.00 |
| <i>Clcn3</i>                                                                                             | chloride channel 3                                                                                                                                                                  | 1438366 x_at | -1.61 | 0.00 |
| <i>L1cam</i>                                                                                             | L1 cell adhesion molecule                                                                                                                                                           | 1450435 at   | -1.61 | 0.00 |
| ---                                                                                                      | ---                                                                                                                                                                                 | 1447724 x_at | -1.61 | 0.00 |
| <i>Niban</i>                                                                                             | niban protein                                                                                                                                                                       | 1454942 at   | -1.61 | 0.00 |
| <i>Adssl1</i>                                                                                            | adenylosuccinate synthetase like 1                                                                                                                                                  | 1449383 at   | -1.61 | 0.00 |
| <i>Trio</i>                                                                                              | Triple functional domain (PTPRF interacting)                                                                                                                                        | 1437505 at   | -1.61 | 0.00 |
| <i>Snx12</i>                                                                                             | Sorting nexin 12                                                                                                                                                                    | 1455465 at   | -1.61 | 0.00 |
| <i>Mylk</i>                                                                                              | myosin, light polypeptide kinase                                                                                                                                                    | 1425506 at   | -1.61 | 0.00 |
| <i>Zbtb20</i>                                                                                            | zinc finger and BTB domain containing 20                                                                                                                                            | 1438443 at   | -1.61 | 0.00 |
| ---                                                                                                      | Transcribed locus                                                                                                                                                                   | 1459630 at   | -1.61 | 0.01 |
| <i>Clcn3</i>                                                                                             | chloride channel 3                                                                                                                                                                  | 1416610 a_at | -1.61 | 0.00 |
| <i>Mapre2</i>                                                                                            | Microtubule-associated protein, RP/EB family, member 2                                                                                                                              | 1445492 at   | -1.61 | 0.00 |
| <i>2410127L17Rik</i> /// <i>LOC626107</i> /// <i>LOC666456</i> /// <i>LOC677519</i> /// <i>LOC677553</i> | RIKEN cDNA 2410127L17 gene /// similar to RIKEN cDNA 2410127L17 /// similar to CG11596-PA, isoform A /// similar to CG11596-PA, isoform A /// similar to RIKEN cDNA 2410127L17 gene | 1429458_at   | -1.61 | 0.00 |
| <i>D430047L21Rik</i>                                                                                     | RIKEN cDNA D430047L21 gene                                                                                                                                                          | 1435590 at   | -1.61 | 0.00 |
| <i>Ndn</i>                                                                                               | neccdin                                                                                                                                                                             | 1437853 x_at | -1.61 | 0.00 |
| <i>0610009O20Rik</i>                                                                                     | RIKEN cDNA 0610009O20 gene                                                                                                                                                          | 1452685 at   | -1.61 | 0.00 |
| <i>Ttc3</i>                                                                                              | tetratricopeptide repeat domain 3                                                                                                                                                   | 1416482 at   | -1.61 | 0.00 |
| <i>Dnahc8</i>                                                                                            | dynein, axonemal, heavy chain 8                                                                                                                                                     | 1424936 a_at | -1.61 | 0.00 |
| <i>Dhcr7</i>                                                                                             | 7-dehydrocholesterol reductase                                                                                                                                                      | 1448619 at   | -1.61 | 0.00 |
| <i>2810055G20Rik</i>                                                                                     | RIKEN cDNA 2810055G20 gene                                                                                                                                                          | 1445363 at   | -1.61 | 0.01 |
| ---                                                                                                      | ---                                                                                                                                                                                 | 1428280 at   | -1.61 | 0.00 |
| <i>Timm8a1</i>                                                                                           | translocase of inner mitochondrial membrane 8 homolog a1 (yeast)                                                                                                                    | 1416345 at   | -1.61 | 0.00 |
| <i>2610008E11Rik</i>                                                                                     | RIKEN cDNA 2610008E11 gene                                                                                                                                                          | 1429281 at   | -1.61 | 0.00 |
| <i>Abcc8</i>                                                                                             | ATP-binding cassette, sub-family C (CFTR/MRP), member 8                                                                                                                             | 1457066 at   | -1.61 | 0.00 |
| <i>Baz2b</i>                                                                                             | bromodomain adjacent to zinc finger domain, 2B                                                                                                                                      | 1440984 at   | -1.61 | 0.00 |
| <i>BC028528</i>                                                                                          | CDNA sequence BC028528                                                                                                                                                              | 1445301 at   | -1.61 | 0.00 |
| <i>Tesc</i>                                                                                              | tescalcin                                                                                                                                                                           | 1418744 s_at | -1.61 | 0.00 |
| <i>Daam1</i>                                                                                             | dishevelled associated activator of morphogenesis 1                                                                                                                                 | 1455244 at   | -1.61 | 0.00 |
| <i>Enpp3</i>                                                                                             | ectonucleotide pyrophosphatase/phosphodiesterase 3                                                                                                                                  | 1452384 at   | -1.61 | 0.01 |
| <i>Spna1</i> /// <i>LOC630963</i>                                                                        | spectrin alpha 1 /// similar to spectrin alpha 1                                                                                                                                    | 1421277 at   | -1.61 | 0.00 |
| <i>Hox</i>                                                                                               | homeobox only domain                                                                                                                                                                | 1451776 s_at | -1.62 | 0.00 |
| <i>Abcc9</i>                                                                                             | ATP-binding cassette, sub-family C (CFTR/MRP), member 9                                                                                                                             | 1435751 at   | -1.62 | 0.00 |
| <i>Sccpdh</i>                                                                                            | saccharopine dehydrogenase (putative)                                                                                                                                               | 1426510 at   | -1.62 | 0.00 |
| ---                                                                                                      | ---                                                                                                                                                                                 | 1459695 at   | -1.62 | 0.00 |
| ---                                                                                                      | ---                                                                                                                                                                                 | 1434444 s_at | -1.62 | 0.00 |
| <i>A1790298</i>                                                                                          | expressed sequence A1790298                                                                                                                                                         | 1427146 at   | -1.62 | 0.00 |
| <i>Fzd2</i>                                                                                              | frizzled homolog 2 ( <i>Drosophila</i> )                                                                                                                                            | 1418532 at   | -1.62 | 0.01 |
| <i>MGC73635</i>                                                                                          | similar to histone 2a                                                                                                                                                               | 1438009 at   | -1.62 | 0.00 |
| ---                                                                                                      | ---                                                                                                                                                                                 | 1434631 at   | -1.62 | 0.00 |
| <i>6720420G18Rik</i>                                                                                     | RIKEN cDNA 6720420G18 gene                                                                                                                                                          | 1432787 at   | -1.62 | 0.00 |
| <i>Sgce</i>                                                                                              | sarcoglycan, epsilon                                                                                                                                                                | 1420688 a_at | -1.62 | 0.00 |
| <i>Odz3</i>                                                                                              | odd Oz/ten-m homolog 3 ( <i>Drosophila</i> )                                                                                                                                        | 1449315 at   | -1.62 | 0.00 |
| <i>Kcnmb1</i>                                                                                            | potassium large conductance calcium-activated channel, subfamily M, beta member 1                                                                                                   | 1421400 at   | -1.62 | 0.00 |
| <i>Pts</i>                                                                                               | 6-pyruvoyl-tetrahydropterin synthase                                                                                                                                                | 1450660 at   | -1.62 | 0.00 |
| <i>Rab22a</i>                                                                                            | RAB22A, member RAS oncogene family                                                                                                                                                  | 1424504 at   | -1.62 | 0.00 |
| <i>Abcb1a</i>                                                                                            | ATP-binding cassette, sub-family B (MDR/TAP), member 1A                                                                                                                             | 1419759 at   | -1.62 | 0.00 |
| <i>Bicc1</i>                                                                                             | bicaudal C homolog 1 ( <i>Drosophila</i> )                                                                                                                                          | 1423484 at   | -1.62 | 0.00 |
| <i>Gtl3</i>                                                                                              | gene trap locus 3                                                                                                                                                                   | 1452896 at   | -1.62 | 0.00 |
| <i>Phf20l1</i>                                                                                           | PHD finger protein 20-like 1                                                                                                                                                        | 1454939 at   | -1.62 | 0.00 |
| <i>Scrn3</i>                                                                                             | secernin 3                                                                                                                                                                          | 1436573 at   | -1.62 | 0.00 |
| <i>9230110I02Rik</i>                                                                                     | RIKEN cDNA 9230110I02 gene                                                                                                                                                          | 1460499 at   | -1.62 | 0.00 |
| <i>Neol</i>                                                                                              | neogenin                                                                                                                                                                            | 1447693 s_at | -1.62 | 0.00 |
| <i>Syne1</i>                                                                                             | synaptic nuclear envelope 1                                                                                                                                                         | 1455493 at   | -1.62 | 0.00 |
| <i>Ccnt2</i>                                                                                             | cyclin T2                                                                                                                                                                           | 1427089 at   | -1.62 | 0.00 |

|                                                                                                |                                                                                                                                                                                                                                                                                                                                                                                                                                                                     |              |       |      |
|------------------------------------------------------------------------------------------------|---------------------------------------------------------------------------------------------------------------------------------------------------------------------------------------------------------------------------------------------------------------------------------------------------------------------------------------------------------------------------------------------------------------------------------------------------------------------|--------------|-------|------|
| <i>Abcb1a</i>                                                                                  | ATP-binding cassette, sub-family B (MDR/TAP), member 1A                                                                                                                                                                                                                                                                                                                                                                                                             | 1419758 at   | -1.62 | 0.00 |
| <i>Dab2</i>                                                                                    | disabled homolog 2 (Drosophila)                                                                                                                                                                                                                                                                                                                                                                                                                                     | 1423805 at   | -1.62 | 0.00 |
| ---                                                                                            | 16 days embryo head cDNA, RIKEN full-length enriched library, clone:C130051K14<br>product:unclassifiable, full insert sequence                                                                                                                                                                                                                                                                                                                                      | 1458324_x_at | -1.62 | 0.00 |
| ---                                                                                            | Transcribed locus                                                                                                                                                                                                                                                                                                                                                                                                                                                   | 1440015 at   | -1.62 | 0.00 |
| <i>Abhd8</i>                                                                                   | abhydrolase domain containing 8                                                                                                                                                                                                                                                                                                                                                                                                                                     | 1416863 at   | -1.62 | 0.00 |
| <i>Zfp647</i>                                                                                  | zinc finger protein 647                                                                                                                                                                                                                                                                                                                                                                                                                                             | 1455633 at   | -1.62 | 0.00 |
| <i>Pdzd6</i>                                                                                   | PDZ domain containing 6                                                                                                                                                                                                                                                                                                                                                                                                                                             | 1454350 at   | -1.62 | 0.00 |
| <i>Syne2</i>                                                                                   | synaptic nuclear envelope 2                                                                                                                                                                                                                                                                                                                                                                                                                                         | 1442285 at   | -1.62 | 0.00 |
| ---                                                                                            | ---                                                                                                                                                                                                                                                                                                                                                                                                                                                                 | 1428140 at   | -1.62 | 0.00 |
| <i>BC024659</i>                                                                                | cDNA sequence BC024659                                                                                                                                                                                                                                                                                                                                                                                                                                              | 1433986 at   | -1.62 | 0.00 |
| <i>Hfe2</i>                                                                                    | hemochromatosis type 2 (juvenile) (human homolog)                                                                                                                                                                                                                                                                                                                                                                                                                   | 1429223 a at | -1.62 | 0.00 |
| <i>Ugt1a2 /// Ugt1a6a /// Ugt1a10 /// Ugt1a7c /// Ugt1a5 /// Ugt1a9 /// Ugt1a6b /// Ugt1a1</i> | UDP glucuronosyltransferase 1 family, polypeptide A2 /// UDP glucuronosyltransferase 1 family, polypeptide A6A /// UDP glycosyltransferase 1 family, polypeptide A10 /// UDP glucuronosyltransferase 1 family, polypeptide A7C /// UDP glucuronosyltransferase 1 family, polypeptide A5 /// UDP glucuronosyltransferase 1 family, polypeptide A9 /// UDP glucuronosyltransferase 1 family, polypeptide A6B /// UDP glucuronosyltransferase 1 family, polypeptide A1 | 1426261_s_at | -1.62 | 0.00 |
| <i>Rcor3</i>                                                                                   | REST corepressor 3                                                                                                                                                                                                                                                                                                                                                                                                                                                  | 1428342 at   | -1.62 | 0.00 |
| <i>Slc25a29</i>                                                                                | solute carrier family 25 (mitochondrial carrier, palmitoylcarnitine transporter), member 29                                                                                                                                                                                                                                                                                                                                                                         | 1423979_a_at | -1.62 | 0.01 |
| <i>Acot7</i>                                                                                   | acyl-CoA thioesterase 7                                                                                                                                                                                                                                                                                                                                                                                                                                             | 1417094 at   | -1.62 | 0.00 |
| <i>Zfp101</i>                                                                                  | zinc finger protein 101                                                                                                                                                                                                                                                                                                                                                                                                                                             | 1450090 at   | -1.62 | 0.00 |
| <i>Fbxl7</i>                                                                                   | F-box and leucine-rich repeat protein 7                                                                                                                                                                                                                                                                                                                                                                                                                             | 1440441 at   | -1.62 | 0.01 |
| <i>Rgs4</i>                                                                                    | regulator of G-protein signaling 4                                                                                                                                                                                                                                                                                                                                                                                                                                  | 1416287 at   | -1.62 | 0.00 |
| <i>9630033F20Rik</i>                                                                           | RIKEN cDNA 9630033F20 gene                                                                                                                                                                                                                                                                                                                                                                                                                                          | 1447934 at   | -1.62 | 0.00 |
| <i>2410005O16Rik</i>                                                                           | RIKEN cDNA 2410005O16 gene                                                                                                                                                                                                                                                                                                                                                                                                                                          | 1457017 at   | -1.62 | 0.00 |
| <i>3110005L24Rik</i>                                                                           | RIKEN cDNA 3110005L24 gene                                                                                                                                                                                                                                                                                                                                                                                                                                          | 1431381 at   | -1.62 | 0.00 |
| <i>Bach2</i>                                                                                   | BTB and CNC homology 2                                                                                                                                                                                                                                                                                                                                                                                                                                              | 1440304 at   | -1.63 | 0.00 |
| <i>Endog</i>                                                                                   | endonuclease G                                                                                                                                                                                                                                                                                                                                                                                                                                                      | 1421097 at   | -1.63 | 0.00 |
| <i>Tmem16a</i>                                                                                 | transmembrane protein 16A                                                                                                                                                                                                                                                                                                                                                                                                                                           | 1459713 s at | -1.63 | 0.00 |
| <i>1810057P16Rik</i>                                                                           | RIKEN cDNA 1810057P16 gene                                                                                                                                                                                                                                                                                                                                                                                                                                          | 1440975 at   | -1.63 | 0.00 |
| <i>Demnd4b</i>                                                                                 | DENN/MADD domain containing 4B                                                                                                                                                                                                                                                                                                                                                                                                                                      | 1427014 at   | -1.63 | 0.00 |
| <i>Mrg1</i>                                                                                    | myeloid ecotropic viral integration site-related gene 1                                                                                                                                                                                                                                                                                                                                                                                                             | 1457632 s at | -1.63 | 0.00 |
| <i>Gatm</i>                                                                                    | glycine amidinotransferase (L-arginine:glycine amidinotransferase)                                                                                                                                                                                                                                                                                                                                                                                                  | 1423569 at   | -1.63 | 0.00 |
| <i>Rapgef2</i>                                                                                 | Rap guanine nucleotide exchange factor (GEF) 2                                                                                                                                                                                                                                                                                                                                                                                                                      | 1452833 at   | -1.63 | 0.00 |
| <i>Rab3i1</i>                                                                                  | RAB3A interacting protein (rabin3)-like 1                                                                                                                                                                                                                                                                                                                                                                                                                           | 1428391 at   | -1.63 | 0.01 |
| <i>Cgml1 /// LOC677485</i>                                                                     | cingulin-like 1 /// similar to cingulin-like 1 isoform 1                                                                                                                                                                                                                                                                                                                                                                                                            | 1452309 at   | -1.63 | 0.00 |
| <i>Lrrc1</i>                                                                                   | leucine rich repeat containing 1                                                                                                                                                                                                                                                                                                                                                                                                                                    | 1452411 at   | -1.63 | 0.00 |
| <i>Cacna1s</i>                                                                                 | calcium channel, voltage-dependent, L type, alpha 1S subunit                                                                                                                                                                                                                                                                                                                                                                                                        | 1420442 at   | -1.63 | 0.00 |
| <i>6720477C19Rik</i>                                                                           | RIKEN cDNA 6720477C19 gene                                                                                                                                                                                                                                                                                                                                                                                                                                          | 1433184 at   | -1.63 | 0.00 |
| <i>Slc16a1</i>                                                                                 | solute carrier family 16 (monocarboxylic acid transporters), member 1                                                                                                                                                                                                                                                                                                                                                                                               | 1415802 at   | -1.63 | 0.00 |
| <i>Polrmt</i>                                                                                  | polymerase (RNA) mitochondrial (DNA directed)                                                                                                                                                                                                                                                                                                                                                                                                                       | 1437377_a at | -1.63 | 0.00 |
| <i>Cap2</i>                                                                                    | CAP, adenylate cyclase-associated protein, 2 (yeast)                                                                                                                                                                                                                                                                                                                                                                                                                | 1450910 at   | -1.63 | 0.00 |
| <i>Dusp3</i>                                                                                   | dual specificity phosphatase 3 (vaccinia virus phosphatase VHI1-related)                                                                                                                                                                                                                                                                                                                                                                                            | 1434472 at   | -1.63 | 0.00 |
| <i>Entpd5</i>                                                                                  | ectonucleoside triphosphate diphosphohydrolase 5                                                                                                                                                                                                                                                                                                                                                                                                                    | 1451765 a at | -1.63 | 0.00 |
| <i>Npnt</i>                                                                                    | nephronectin                                                                                                                                                                                                                                                                                                                                                                                                                                                        | 1452106 at   | -1.63 | 0.00 |
| <i>Dicer1</i>                                                                                  | Dicer1, Dcr-1 homolog (Drosophila)                                                                                                                                                                                                                                                                                                                                                                                                                                  | 1460571 at   | -1.63 | 0.00 |
| <i>Nfatc2</i>                                                                                  | nuclear factor of activated T-cells, cytoplasmic, calcineurin-dependent 2                                                                                                                                                                                                                                                                                                                                                                                           | 1426032 at   | -1.63 | 0.00 |
| <i>Eif4e /// LOC630527</i>                                                                     | eukaryotic translation initiation factor 4E /// hypothetical LOC630527                                                                                                                                                                                                                                                                                                                                                                                              | 1450908 at   | -1.63 | 0.00 |
| <i>AV009015</i>                                                                                | expressed sequence AV009015                                                                                                                                                                                                                                                                                                                                                                                                                                         | 1455014 at   | -1.63 | 0.00 |
| <i>BC022224</i>                                                                                | cDNA sequence BC022224                                                                                                                                                                                                                                                                                                                                                                                                                                              | 1425704 at   | -1.63 | 0.00 |
| <i>Tomm40l</i>                                                                                 | translocase of outer mitochondrial membrane 40 homolog-like (yeast)                                                                                                                                                                                                                                                                                                                                                                                                 | 1455614 at   | -1.63 | 0.00 |
| <i>Anks1</i>                                                                                   | ankyrin repeat and SAM domain containing 1                                                                                                                                                                                                                                                                                                                                                                                                                          | 1452204 at   | -1.63 | 0.00 |
| <i>Sox17</i>                                                                                   | SRV-box containing gene 17                                                                                                                                                                                                                                                                                                                                                                                                                                          | 1429177_x at | -1.63 | 0.00 |
| <i>Coq7</i>                                                                                    | demethyl-Q 7                                                                                                                                                                                                                                                                                                                                                                                                                                                        | 1416665 at   | -1.63 | 0.00 |
| <i>Ches1</i>                                                                                   | checkpoint suppressor 1                                                                                                                                                                                                                                                                                                                                                                                                                                             | 1436925 at   | -1.64 | 0.00 |
| <i>Klf12</i>                                                                                   | Kruppel-like factor 12                                                                                                                                                                                                                                                                                                                                                                                                                                              | 1439846 at   | -1.64 | 0.00 |
| <i>Magi2</i>                                                                                   | membrane associated guanylate kinase, WW and PDZ domain containing 2                                                                                                                                                                                                                                                                                                                                                                                                | 1454855 at   | -1.64 | 0.01 |
| <i>Zfp329</i>                                                                                  | zinc finger protein 329                                                                                                                                                                                                                                                                                                                                                                                                                                             | 1431830 at   | -1.64 | 0.00 |
| <i>Sirt3</i>                                                                                   | sirtuin 3 (silent mating type information regulation 2, homolog) 3 (S. cerevisiae)                                                                                                                                                                                                                                                                                                                                                                                  | 1417892 a at | -1.64 | 0.00 |
| <i>Akap1</i>                                                                                   | A kinase (PRKA) anchor protein 1                                                                                                                                                                                                                                                                                                                                                                                                                                    | 1449019 at   | -1.64 | 0.00 |
| <i>Cttnb1</i>                                                                                  | catenin (cadherin associated protein), beta 1                                                                                                                                                                                                                                                                                                                                                                                                                       | 1430533 a at | -1.64 | 0.00 |
| <i>A1428795</i>                                                                                | expressed sequence A1428795                                                                                                                                                                                                                                                                                                                                                                                                                                         | 1449520 at   | -1.64 | 0.00 |
| <i>Nfib</i>                                                                                    | nuclear factor I/B                                                                                                                                                                                                                                                                                                                                                                                                                                                  | 1454834 at   | -1.64 | 0.00 |
| <i>Csrp1</i>                                                                                   | cysteine and glycine-rich protein 1                                                                                                                                                                                                                                                                                                                                                                                                                                 | 1425810 a at | -1.64 | 0.00 |
| <i>Alas1</i>                                                                                   | aminolevulinic acid synthase 1                                                                                                                                                                                                                                                                                                                                                                                                                                      | 1455282 x at | -1.64 | 0.00 |
| <i>Dyrk2</i>                                                                                   | dual-specificity tyrosine-(Y)-phosphorylation regulated kinase 2                                                                                                                                                                                                                                                                                                                                                                                                    | 1428637 at   | -1.64 | 0.00 |
| <i>Gpsn2</i>                                                                                   | glycoprotein, synaptic 2                                                                                                                                                                                                                                                                                                                                                                                                                                            | 1416352 s at | -1.64 | 0.00 |
| <i>Ehd2 /// LOC673251</i>                                                                      | EH-domain containing 2 /// similar to EH-domain containing 2                                                                                                                                                                                                                                                                                                                                                                                                        | 1435785 at   | -1.64 | 0.00 |
| <i>Gpr177</i>                                                                                  | G protein-coupled receptor 177                                                                                                                                                                                                                                                                                                                                                                                                                                      | 1423825 at   | -1.64 | 0.00 |
| <i>Ppm1l</i>                                                                                   | protein phosphatase 1 (formerly 2C)-like                                                                                                                                                                                                                                                                                                                                                                                                                            | 1435787 at   | -1.64 | 0.00 |
| <i>6430570G24</i>                                                                              | hypothetical protein 6430570G24                                                                                                                                                                                                                                                                                                                                                                                                                                     | 1454901 at   | -1.64 | 0.01 |
| <i>Bche</i>                                                                                    | butyrylcholinesterase                                                                                                                                                                                                                                                                                                                                                                                                                                               | 1436098 at   | -1.64 | 0.00 |
| <i>C230004L04</i>                                                                              | hypothetical protein C230004L04                                                                                                                                                                                                                                                                                                                                                                                                                                     | 1457568 at   | -1.64 | 0.00 |
| <i>Cand2</i>                                                                                   | cullin-associated and neddylation-dissociated 2 (putative)                                                                                                                                                                                                                                                                                                                                                                                                          | 1429622 at   | -1.64 | 0.00 |
| <i>Drctnbn1a</i>                                                                               | down-regulated by Cttnb1, a                                                                                                                                                                                                                                                                                                                                                                                                                                         | 1450724 at   | -1.64 | 0.00 |
| <i>Crip2</i>                                                                                   | cysteine rich protein 2                                                                                                                                                                                                                                                                                                                                                                                                                                             | 1417311 at   | -1.64 | 0.00 |
| ---                                                                                            | Adult male liver tumor cDNA, RIKEN full-length enriched library, clone:C730040G13<br>product:unclassifiable, full insert sequence                                                                                                                                                                                                                                                                                                                                   | 1444108_at   | -1.64 | 0.00 |
| ---                                                                                            | ---                                                                                                                                                                                                                                                                                                                                                                                                                                                                 | 1439789 at   | -1.64 | 0.00 |
| <i>Tmcc2</i>                                                                                   | transmembrane and coiled-coil domains 2                                                                                                                                                                                                                                                                                                                                                                                                                             | 1428108 x at | -1.64 | 0.00 |
| <i>Sh3bgr</i>                                                                                  | SH3-binding domain glutamic acid-rich protein                                                                                                                                                                                                                                                                                                                                                                                                                       | 1422644 at   | -1.64 | 0.00 |
| <i>Ankrd44</i>                                                                                 | ankyrin repeat domain 44                                                                                                                                                                                                                                                                                                                                                                                                                                            | 1434856 at   | -1.64 | 0.00 |
| <i>Trio</i>                                                                                    | triple functional domain (TPRF interacting)                                                                                                                                                                                                                                                                                                                                                                                                                         | 1454711 at   | -1.64 | 0.00 |
| <i>Epha7</i>                                                                                   | Eph receptor A7                                                                                                                                                                                                                                                                                                                                                                                                                                                     | 1451991 at   | -1.64 | 0.00 |
| <i>P4ha2</i>                                                                                   | procollagen-proline, 2-oxoglutarate 4-dioxygenase (proline 4-hydroxylase), alpha II polypeptide                                                                                                                                                                                                                                                                                                                                                                     | 1417149_at   | -1.64 | 0.00 |
| <i>Cep68</i>                                                                                   | centrosomal protein 68                                                                                                                                                                                                                                                                                                                                                                                                                                              | 1456325 at   | -1.64 | 0.00 |
| <i>Ipo13</i>                                                                                   | importin 13                                                                                                                                                                                                                                                                                                                                                                                                                                                         | 1433464 at   | -1.64 | 0.00 |
| <i>LOC380843 /// LOC638266 /// LOC666794</i>                                                   | similar to RNA binding motif protein 24 /// similar to RNA binding motif protein 24 /// similar to RNA binding motif protein 24                                                                                                                                                                                                                                                                                                                                     | 1456180_at   | -1.64 | 0.00 |
| <i>Cox10</i>                                                                                   | COX10 homolog, cytochrome c oxidase assembly protein, heme A: farnesyltransferase (yeast)                                                                                                                                                                                                                                                                                                                                                                           | 1429329_at   | -1.64 | 0.00 |
| <i>Bank1</i>                                                                                   | B-cell scaffold protein with ankyrin repeats 1                                                                                                                                                                                                                                                                                                                                                                                                                      | 1456328 at   | -1.64 | 0.00 |
| <i>4930534B04Rik</i>                                                                           | RIKEN cDNA 4930534B04 gene                                                                                                                                                                                                                                                                                                                                                                                                                                          | 1429228 at   | -1.64 | 0.00 |
| <i>Tic19</i>                                                                                   | tetratricopeptide repeat domain 19                                                                                                                                                                                                                                                                                                                                                                                                                                  | 1427114 at   | -1.64 | 0.00 |

|                      |                                                                                                                                    |              |       |      |
|----------------------|------------------------------------------------------------------------------------------------------------------------------------|--------------|-------|------|
| <i>Cbl1</i>          | Casitas B-lineage lymphoma-like 1                                                                                                  | 1437203 at   | -1.65 | 0.00 |
| <i>Jarid2</i>        | jumonji, AT rich interactive domain 2                                                                                              | 1450710 at   | -1.65 | 0.00 |
| ---                  | Adult male brain cDNA, RIKEN full-length enriched library, clone:3526403L10<br>product:unclassifiable, full insert sequence        | 1440153_at   | -1.65 | 0.00 |
| <i>Gpt1</i>          | glutamic pyruvic transaminase 1, soluble                                                                                           | 1426502 s at | -1.65 | 0.00 |
| <i>Ejemp1</i>        | epidermal growth factor-containing fibulin-like extracellular matrix protein 1                                                     | 1427183 at   | -1.65 | 0.00 |
| <i>5730407107Rik</i> | RIKEN cDNA 5730407107 gene                                                                                                         | 1432916 at   | -1.65 | 0.00 |
| <i>Ldb3</i>          | LIM domain binding 3                                                                                                               | 1416752 at   | -1.65 | 0.00 |
| <i>Sc5d</i>          | sterol-C5-desaturase (fungal ERG3, delta-5-desaturase) homolog (S. cerevisiae)                                                     | 1434520 at   | -1.65 | 0.00 |
| ---                  | 13 days embryo forelimb cDNA, RIKEN full-length enriched library, clone:5930438H13<br>product:unclassifiable, full insert sequence | 1455150_at   | -1.65 | 0.00 |
| <i>Gpr155</i>        | G protein-coupled receptor 155                                                                                                     | 1452353 at   | -1.65 | 0.00 |
| <i>Htra1</i>         | Htra serine peptidase 1                                                                                                            | 1438251 x at | -1.65 | 0.00 |
| <i>A630025C20Rik</i> | RIKEN cDNA A630025C20 gene                                                                                                         | 1443779 s at | -1.65 | 0.00 |
| ---                  | ---                                                                                                                                | 1445315 at   | -1.65 | 0.00 |
| <i>Mef2a</i>         | myocyte enhancer factor 2A                                                                                                         | 1452347 at   | -1.65 | 0.00 |
| <i>Zfpn1a2</i>       | zinc finger protein, subfamily 1A, 2 (Helios)                                                                                      | 1456956 at   | -1.65 | 0.00 |
| <i>D430028G21Rik</i> | RIKEN cDNA D430028G21 gene                                                                                                         | 1451176 at   | -1.65 | 0.00 |
| <i>BC029103</i>      | cDNA sequence BC029103                                                                                                             | 1440226 at   | -1.65 | 0.00 |
| <i>Btb3</i>          | BTB (POZ) domain containing 3                                                                                                      | 1425660 at   | -1.65 | 0.00 |
| <i>Kif13a</i>        | kinesin family member 13A                                                                                                          | 1455746 at   | -1.65 | 0.00 |
| <i>Dlat</i>          | dihydrolipoamide S-acetyltransferase (E2 component of pyruvate dehydrogenase complex)                                              | 1452005_at   | -1.65 | 0.00 |
| <i>Pigh</i>          | phosphatidylinositol glycan, class H                                                                                               | 1455860 at   | -1.65 | 0.00 |
| <i>Vapb</i>          | vesicle-associated membrane protein, associated protein B and C                                                                    | 1458501 at   | -1.65 | 0.00 |
| <i>Osbpl3</i>        | oxysterol binding protein-like 3                                                                                                   | 1438724 at   | -1.65 | 0.00 |
| <i>Si5</i>           | suppression of tumorigenicity 5                                                                                                    | 1428372 at   | -1.65 | 0.00 |
| <i>2510005D08Rik</i> | RIKEN cDNA 2510005D08 gene                                                                                                         | 1449072 a at | -1.65 | 0.00 |
| ---                  | ---                                                                                                                                | 1440440 at   | -1.65 | 0.00 |
| <i>Tmpt</i>          | thymopoietin                                                                                                                       | 1426349 s at | -1.65 | 0.00 |
| <i>4931432P07Rik</i> | RIKEN cDNA 4931432P07 gene                                                                                                         | 1443415 at   | -1.65 | 0.00 |
| <i>Cdc14b</i>        | CDC14 cell division cycle 14 homolog B (S. cerevisiae)                                                                             | 1437070 at   | -1.65 | 0.01 |
| <i>Tmem141</i>       | transmembrane protein 141                                                                                                          | 1435259 s at | -1.65 | 0.00 |
| <i>Bicd2</i>         | bicaudal D homolog 2 (Drosophila)                                                                                                  | 1450733 at   | -1.66 | 0.00 |
| <i>Jam3</i>          | junction adhesion molecule 3                                                                                                       | 1423503 at   | -1.66 | 0.00 |
| <i>Tmod4</i>         | tropomodulin 4                                                                                                                     | 1449969 at   | -1.66 | 0.00 |
| <i>Tmem63b</i>       | transmembrane protein 63b                                                                                                          | 1452219 at   | -1.66 | 0.00 |
| <i>Zfp449</i>        | zinc finger protein 449                                                                                                            | 1439945 at   | -1.66 | 0.00 |
| <i>Dag1</i>          | dystroglycan 1                                                                                                                     | 1423872 a at | -1.66 | 0.00 |
| <i>E030016H06Rik</i> | RIKEN cDNA E030016H06 gene                                                                                                         | 1440443 at   | -1.66 | 0.00 |
| <i>Oxct1</i>         | 3-oxoacid CoA transferase 1                                                                                                        | 1455804 x at | -1.66 | 0.00 |
| <i>Ptik1</i>         | PFTAIRE protein kinase 1                                                                                                           | 1419249 at   | -1.66 | 0.00 |
| <i>Lrrc20</i>        | leucine rich repeat containing 20                                                                                                  | 1438422 at   | -1.66 | 0.00 |
| <i>Dag1</i>          | dystroglycan 1                                                                                                                     | 1426779 x at | -1.66 | 0.00 |
| <i>Rps6ka5</i>       | ribosomal protein S6 kinase, polypeptide 5                                                                                         | 1431050 at   | -1.66 | 0.00 |
| <i>Msi2</i>          | Musashi homolog 2 (Drosophila)                                                                                                     | 1421230 a at | -1.66 | 0.00 |
| <i>Apbb1</i>         | amyloid beta (A4) precursor protein-binding, family B, member 1                                                                    | 1423892 at   | -1.66 | 0.00 |
| <i>Adams10</i>       | a disintegrin-like and metallopeptidase (reprolysin type) with thrombospondin type 1 motif, 10                                     | 1427139_at   | -1.66 | 0.01 |
| <i>5730509K17Rik</i> | RIKEN cDNA 5730509K17 gene                                                                                                         | 1436426 at   | -1.66 | 0.01 |
| <i>4732466D17Rik</i> | RIKEN cDNA 4732466D17 gene                                                                                                         | 1426876 at   | -1.66 | 0.00 |
| <i>Slc26a6</i>       | solute carrier family 26, member 6                                                                                                 | 1416275 at   | -1.66 | 0.01 |
| <i>1810049H13Rik</i> | RIKEN cDNA 1810049H13 gene                                                                                                         | 1441878 s at | -1.66 | 0.00 |
| <i>Mbnl2</i>         | Muscleblind-like 2                                                                                                                 | 1446475 at   | -1.66 | 0.00 |
| <i>Map3k4</i>        | mitogen activated protein kinase kinase kinase 4                                                                                   | 1459800 s at | -1.66 | 0.00 |
| <i>Fmod</i>          | fibromodulin                                                                                                                       | 1438966 x at | -1.66 | 0.00 |
| <i>Dnase2a</i>       | deoxyribonuclease II alpha                                                                                                         | 1430135 at   | -1.66 | 0.00 |
| ---                  | Transcribed locus                                                                                                                  | 1441425 at   | -1.66 | 0.00 |
| <i>Myl1</i>          | myosin, light polypeptide 1                                                                                                        | 1452651 a at | -1.66 | 0.00 |
| <i>Trak1</i>         | trafficking protein, kinesin binding 1                                                                                             | 1452742 at   | -1.66 | 0.00 |
| <i>BC054059</i>      | cDNA sequence BC054059                                                                                                             | 1424729 at   | -1.66 | 0.00 |
| <i>Kcnk3</i>         | potassium channel, subfamily K, member 3                                                                                           | 1425342 a at | -1.66 | 0.01 |
| ---                  | ---                                                                                                                                | 1447057 at   | -1.66 | 0.00 |
| <i>AW112037</i>      | expressed sequence AW112037                                                                                                        | 1435326 at   | -1.66 | 0.00 |
| <i>Mrpl19</i>        | mitochondrial ribosomal protein L19                                                                                                | 1450405 at   | -1.66 | 0.00 |
| <i>Odz3</i>          | odd Oz/ten-m homolog 3 (Drosophila)                                                                                                | 1429178 at   | -1.66 | 0.00 |
| <i>Sfs1</i>          | splicing factor, arginine/serine-rich 1 (ASF/SF2)                                                                                  | 1428100 at   | -1.66 | 0.00 |
| <i>Smpx</i>          | small muscle protein, X-linked                                                                                                     | 1418095 at   | -1.66 | 0.00 |
| <i>Pea15</i>         | phosphoprotein enriched in astrocytes 15                                                                                           | 1416407 at   | -1.67 | 0.00 |
| <i>Ppm1l</i>         | protein phosphatase 1 (formerly 2C)-like                                                                                           | 1438012 at   | -1.67 | 0.00 |
| ---                  | 16 days embryo head cDNA, RIKEN full-length enriched library, clone:C130025B04<br>product:unclassifiable, full insert sequence     | 1439887_at   | -1.67 | 0.00 |
| <i>Gsk3b</i>         | glycogen synthase kinase 3 beta                                                                                                    | 1437001 at   | -1.67 | 0.00 |
| <i>Bnk</i>           | B-cell linker                                                                                                                      | 1451780 at   | -1.67 | 0.00 |
| <i>Cxxc5</i>         | CXXC finger 5                                                                                                                      | 1431469 a at | -1.67 | 0.00 |
| <i>Stk17b</i>        | serine/threonine kinase 17b (apoptosis-inducing)                                                                                   | 1450997 at   | -1.67 | 0.00 |
| <i>Usp15</i>         | ubiquitin specific peptidase 15                                                                                                    | 1455842 x at | -1.67 | 0.00 |
| <i>Sirt5</i>         | sirtuin 5 (silent mating type information regulation 2 homolog) 5 (S. cerevisiae)                                                  | 1428916 s at | -1.67 | 0.00 |
| <i>Jam2</i>          | junction adhesion molecule 2                                                                                                       | 1449408 at   | -1.67 | 0.00 |
| <i>Ppif</i>          | peptidylprolyl isomerase F (cyclophilin F)                                                                                         | 1416940 at   | -1.67 | 0.00 |
| <i>Slc2a4</i>        | solute carrier family 2 (facilitated glucose transporter), member 4                                                                | 1415959 at   | -1.67 | 0.01 |
| <i>Nfib</i>          | nuclear factor I/B                                                                                                                 | 1427680 a at | -1.67 | 0.00 |
| <i>1810058I24Rik</i> | RIKEN cDNA 1810058I24 gene                                                                                                         | 1442129 at   | -1.67 | 0.00 |
| <i>AW493563</i>      | expressed sequence AW493563                                                                                                        | 1441751 at   | -1.67 | 0.00 |
| <i>Igf2r</i>         | insulin-like growth factor 2 receptor                                                                                              | 1424112 at   | -1.67 | 0.00 |
| <i>Larp5</i>         | La ribonucleoprotein domain family, member 5                                                                                       | 1434598 at   | -1.67 | 0.00 |
| <i>Dbh</i>           | dopamine beta hydroxylase                                                                                                          | 1450670 at   | -1.67 | 0.00 |
| <i>Fcgrt</i>         | Fc receptor, IgG, alpha chain transporter                                                                                          | 1416978 at   | -1.67 | 0.00 |
| <i>Trdn</i>          | triadin                                                                                                                            | 1426142 a at | -1.67 | 0.00 |
| <i>Rhoq</i>          | ras homolog gene family, member Q                                                                                                  | 1427918 a at | -1.67 | 0.00 |
| <i>Mdga1</i>         | MAM domain containing glycosylphosphatidylinositol anchor 1                                                                        | 1432062 at   | -1.67 | 0.00 |
| <i>Sln</i>           | sarcophilin                                                                                                                        | 1420884 at   | -1.67 | 0.00 |
| <i>Setd8</i>         | SET domain containing (lysine methyltransferase) 8                                                                                 | 1426406 at   | -1.67 | 0.01 |
| <i>Scmh1</i>         | sex comb on midleg homolog 1                                                                                                       | 1439554 at   | -1.67 | 0.00 |
| <i>Zbtb20</i>        | zinc finger and BTB domain containing 20                                                                                           | 1439128 at   | -1.67 | 0.00 |
| <i>Ralgps2</i>       | Ral GEF with PH domain and SH3 binding motif 2                                                                                     | 1428789 at   | -1.67 | 0.00 |



|                                                                |                                                                                                                                                                 |              |       |      |
|----------------------------------------------------------------|-----------------------------------------------------------------------------------------------------------------------------------------------------------------|--------------|-------|------|
| 2310046A06Rik ///<br>2810047F03Rik                             | RIKEN cDNA 2310046A06 gene /// RIKEN cDNA 2810047F03 gene                                                                                                       | 1453059_at   | -1.67 | 0.00 |
| 2700097O09Rik                                                  | RIKEN cDNA 2700097O09 gene                                                                                                                                      | 1428810_at   | -1.67 | 0.00 |
| <i>Rcsd1</i>                                                   | RCS domain containing 1                                                                                                                                         | 1442866_at   | -1.67 | 0.00 |
| <i>Xrcc6bp1</i>                                                | XRCC6 binding protein 1                                                                                                                                         | 1453380_a_at | -1.67 | 0.00 |
| <i>Jph2</i>                                                    | junctophilin 2                                                                                                                                                  | 1421453_at   | -1.67 | 0.01 |
| BC004004                                                       | cDNA sequence BC004004                                                                                                                                          | 1438534_x_at | -1.68 | 0.00 |
| <i>Epb4.114a</i>                                               | erythrocyte protein band 4.1-like 4a                                                                                                                            | 1449167_at   | -1.68 | 0.00 |
| <i>St6gal1</i>                                                 | beta galactoside alpha 2,6 sialyltransferase 1                                                                                                                  | 1420928_at   | -1.68 | 0.00 |
| <i>Csflr</i>                                                   | colony stimulating factor 1 receptor                                                                                                                            | 1419872_at   | -1.68 | 0.01 |
| ---                                                            | ---                                                                                                                                                             | 1438702_at   | -1.68 | 0.00 |
| <i>Txndc13</i>                                                 | thioredoxin domain containing 13                                                                                                                                | 1453120_at   | -1.68 | 0.00 |
| 6430570G24                                                     | hypothetical protein 6430570G24                                                                                                                                 | 1434277_a_at | -1.68 | 0.01 |
| BC026432                                                       | cDNA sequence BC026432                                                                                                                                          | 1424506_at   | -1.68 | 0.00 |
| <i>Kcnk3</i>                                                   | potassium channel, subfamily K, member 3                                                                                                                        | 1426058_a_at | -1.68 | 0.01 |
| <i>Pla2g4e</i>                                                 | phospholipase A2, group IVE                                                                                                                                     | 1429862_at   | -1.68 | 0.00 |
| <i>Reep1</i>                                                   | Receptor accessory protein 1                                                                                                                                    | 1449662_at   | -1.68 | 0.00 |
| AI585793                                                       | expressed sequence AI585793                                                                                                                                     | 1438719_at   | -1.68 | 0.00 |
| <i>Mrpl1</i>                                                   | mitochondrial ribosomal protein L1                                                                                                                              | 1423351_at   | -1.68 | 0.00 |
| <i>Igl-V1</i> /// 2010309G21Rik ///<br>LOC207685 /// LOC386520 | immunoglobulin lambda chain, variable 1 /// RIKEN cDNA 2010309G21 gene ///<br>hypothetical protein LOC207685 /// similar to Ig lambda-b3 chain C region - mouse | 1428720_s_at | -1.68 | 0.00 |
| AI585793                                                       | Expressed sequence AI585793                                                                                                                                     | 1455597_at   | -1.68 | 0.00 |
| LOC434128                                                      | Similar to KIAA1183 protein                                                                                                                                     | 1435960_at   | -1.68 | 0.00 |
| ---                                                            | 12 days embryo spinal ganglion cDNA, RIKEN full-length enriched library,<br>clone:D130046A02 product:unclassifiable, full insert sequence                       | 1439632_at   | -1.68 | 0.00 |
| 2900062L11Rik                                                  | RIKEN cDNA 2900062L11 gene                                                                                                                                      | 1428333_at   | -1.68 | 0.00 |
| <i>Sik38</i>                                                   | serine/threonine kinase 38                                                                                                                                      | 1439938_at   | -1.68 | 0.00 |
| <i>Camk1d</i>                                                  | calcium/calmodulin-dependent protein kinase ID                                                                                                                  | 1426389_at   | -1.68 | 0.00 |
| B230337E12Rik                                                  | RIKEN cDNA B230337E12 gene                                                                                                                                      | 1434671_at   | -1.68 | 0.00 |
| C630002B14Rik                                                  | RIKEN cDNA C630002B14 gene                                                                                                                                      | 1427057_at   | -1.68 | 0.00 |
| D430028G21Rik                                                  | RIKEN cDNA D430028G21 gene                                                                                                                                      | 1439185_x_at | -1.68 | 0.00 |
| <i>Thra</i>                                                    | thyroid hormone receptor alpha                                                                                                                                  | 1443952_at   | -1.68 | 0.00 |
| <i>Zfp629</i>                                                  | zinc finger protein 629                                                                                                                                         | 1436537_at   | -1.68 | 0.00 |
| <i>Il10rb</i>                                                  | interleukin 10 receptor, beta                                                                                                                                   | 1419455_at   | -1.68 | 0.00 |
| <i>Pstk</i>                                                    | phosphoseryl-tRNA kinase                                                                                                                                        | 1434516_at   | -1.68 | 0.00 |
| <i>She</i>                                                     | src homology 2 domain-containing transforming protein E                                                                                                         | 1457094_at   | -1.68 | 0.00 |
| 1810029C22Rik                                                  | RIKEN cDNA 1810029C22 gene                                                                                                                                      | 1449971_a_at | -1.68 | 0.00 |
| <i>Fbln1</i>                                                   | fibulin 1                                                                                                                                                       | 1451119_a_at | -1.68 | 0.01 |
| AI851716                                                       | expressed sequence AI851716                                                                                                                                     | 1455139_at   | -1.69 | 0.00 |
| <i>Trak1</i>                                                   | trafficking protein, kinesin binding 1                                                                                                                          | 1428327_at   | -1.69 | 0.00 |
| <i>Macf1</i>                                                   | microtubule-actin crosslinking factor 1                                                                                                                         | 1428848_a_at | -1.69 | 0.00 |
| <i>Pura</i>                                                    | purine rich element binding protein A                                                                                                                           | 1456898_at   | -1.69 | 0.00 |
| <i>Asb1</i>                                                    | ankyrin repeat and SOCS box-containing protein 1                                                                                                                | 1434961_at   | -1.69 | 0.00 |
| <i>Fbxo5</i>                                                   | F-box only protein 5                                                                                                                                            | 1429499_at   | -1.69 | 0.00 |
| <i>Als2cr19</i>                                                | Amyotrophic lateral sclerosis 2 (juvenile) chromosome region, candidate 19 (human)                                                                              | 1445377_at   | -1.69 | 0.00 |
| <i>Optn</i>                                                    | optineurin                                                                                                                                                      | 1435679_at   | -1.69 | 0.00 |
| D6Wsu176e                                                      | DNA segment, Chr 6, Wayne State University 176, expressed                                                                                                       | 1448904_at   | -1.69 | 0.00 |
| <i>Abra</i>                                                    | actin-binding Rho activating protein                                                                                                                            | 1458455_at   | -1.69 | 0.00 |
| 4930543C13Rik                                                  | RIKEN cDNA 4930543C13 gene                                                                                                                                      | 1430154_at   | -1.69 | 0.00 |
| <i>Them4</i>                                                   | thioesterase superfamily member 4                                                                                                                               | 1427055_at   | -1.69 | 0.00 |
| <i>Ntf3</i>                                                    | neurotrophin 3                                                                                                                                                  | 1450803_at   | -1.69 | 0.00 |
| 1110007M04Rik                                                  | RIKEN cDNA 1110007M04 gene                                                                                                                                      | 1427997_at   | -1.69 | 0.00 |
| <i>Zfp191</i>                                                  | zinc finger protein 191                                                                                                                                         | 1430651_s_at | -1.69 | 0.00 |
| <i>Bzw2</i>                                                    | basic leucine zipper and W2 domains 2                                                                                                                           | 1423456_at   | -1.69 | 0.00 |
| 6330505F04Rik                                                  | RIKEN cDNA 6330505F04 gene                                                                                                                                      | 1426832_at   | -1.69 | 0.00 |
| <i>Epha4</i>                                                   | Eph receptor A4                                                                                                                                                 | 1456863_at   | -1.69 | 0.00 |
| <i>Bnc1</i>                                                    | basonuclin 1                                                                                                                                                    | 1424890_at   | -1.69 | 0.00 |
| <i>Gcap14</i>                                                  | granule cell antiserum positive 14                                                                                                                              | 1453240_a_at | -1.69 | 0.00 |
| <i>Gm944</i>                                                   | gene model 944, (NCBI)                                                                                                                                          | 1436827_at   | -1.69 | 0.00 |
| <i>Snrpd3</i>                                                  | Small nuclear ribonucleoprotein D3                                                                                                                              | 1449629_s_at | -1.69 | 0.00 |
| ---                                                            | ---                                                                                                                                                             | 1423613_at   | -1.69 | 0.00 |
| <i>Bace2</i>                                                   | beta-site APP-cleaving enzyme 2                                                                                                                                 | 1416673_at   | -1.69 | 0.00 |
| <i>Prps2</i>                                                   | phosphoribosyl pyrophosphate synthetase 2                                                                                                                       | 1454843_at   | -1.69 | 0.00 |
| 2410003P15Rik                                                  | RIKEN cDNA 2410003P15 gene                                                                                                                                      | 1448337_at   | -1.69 | 0.00 |
| <i>Phlpp</i>                                                   | PH domain and leucine rich repeat protein phosphatase                                                                                                           | 1426994_at   | -1.69 | 0.00 |
| <i>Clmn</i>                                                    | calmin                                                                                                                                                          | 1439117_at   | -1.69 | 0.00 |
| <i>Ints12</i>                                                  | integrator complex subunit 12                                                                                                                                   | 1428985_at   | -1.69 | 0.00 |
| <i>Dut</i>                                                     | deoxyuridine triphosphatase                                                                                                                                     | 1419270_a_at | -1.69 | 0.00 |
| <i>Dnajb5</i>                                                  | DnaJ (Hsp40) homolog, subfamily B, member 5                                                                                                                     | 1450436_s_at | -1.70 | 0.00 |
| <i>Prrx1</i>                                                   | paired related homeobox 1                                                                                                                                       | 1425528_at   | -1.70 | 0.00 |
| <i>Fahd1</i>                                                   | fumarylacetoacetate hydrolase domain containing 1                                                                                                               | 1419547_at   | -1.70 | 0.00 |
| <i>Mrps6</i>                                                   | mitochondrial ribosomal protein S6                                                                                                                              | 1447585_s_at | -1.70 | 0.00 |
| <i>Palm2</i>                                                   | paralemmin 2                                                                                                                                                    | 1441055_at   | -1.70 | 0.00 |
| <i>Sik39</i>                                                   | serine/threonine kinase 39, STE20/SPS1 homolog (yeast)                                                                                                          | 1419551_s_at | -1.70 | 0.00 |
| <i>Pbx1</i>                                                    | Pre B-cell leukemia transcription factor 1                                                                                                                      | 1440954_at   | -1.70 | 0.01 |
| <i>Arpc5l</i>                                                  | actin related protein 2/3 complex, subunit 5-like                                                                                                               | 1436421_s_at | -1.70 | 0.00 |
| <i>Dmx1l</i>                                                   | Dmx-like 1                                                                                                                                                      | 1424672_at   | -1.70 | 0.00 |
| <i>Reep5</i>                                                   | receptor accessory protein 5                                                                                                                                    | 1426376_at   | -1.70 | 0.00 |
| <i>Tspan6</i>                                                  | tetraspanin 6                                                                                                                                                   | 1416872_at   | -1.70 | 0.00 |
| <i>Rtn4ip1</i>                                                 | reticulum 4 interacting protein 1                                                                                                                               | 1417668_at   | -1.70 | 0.01 |
| <i>Prox1</i>                                                   | prospero-related homeobox 1                                                                                                                                     | 1437894_at   | -1.70 | 0.00 |
| <i>Akr1c19</i>                                                 | aldo-keto reductase family 1, member C19                                                                                                                        | 1455454_at   | -1.70 | 0.00 |
| <i>Iipr1</i>                                                   | inositol 1,4,5-trisphosphate receptor 1                                                                                                                         | 1460203_at   | -1.70 | 0.00 |
| <i>Cdh2</i>                                                    | cadherin 2                                                                                                                                                      | 1418815_at   | -1.70 | 0.00 |
| <i>Tmem64</i>                                                  | transmembrane protein 64                                                                                                                                        | 1433735_a_at | -1.70 | 0.00 |
| 3110031B13Rik                                                  | RIKEN cDNA 3110031B13 gene                                                                                                                                      | 1435696_s_at | -1.70 | 0.00 |
| <i>Klhdc1</i>                                                  | kelch domain containing 1                                                                                                                                       | 1443932_at   | -1.70 | 0.00 |
| <i>Dpysl2</i>                                                  | dihydropyrimidinase-like 2                                                                                                                                      | 1433770_at   | -1.70 | 0.00 |
| 2310005E10Rik                                                  | RIKEN cDNA 2310005E10 gene                                                                                                                                      | 1425684_at   | -1.70 | 0.00 |
| <i>Dyrk2</i>                                                   | dual-specificity tyrosine-(Y)-phosphorylation regulated kinase 2                                                                                                | 1436918_at   | -1.70 | 0.00 |
| <i>Ccdc85a</i>                                                 | coiled-coil domain containing 85A                                                                                                                               | 1452332_at   | -1.70 | 0.00 |
| <i>Prkca</i>                                                   | protein kinase C, alpha                                                                                                                                         | 1450945_at   | -1.70 | 0.00 |
| <i>Mrc2</i>                                                    | mannose receptor, C type 2                                                                                                                                      | 1421045_at   | -1.70 | 0.01 |
| <i>Gil3</i>                                                    | gene trap locus 3                                                                                                                                               | 1419462_s_at | -1.70 | 0.00 |
| BC028265                                                       | cDNA sequence BC028265                                                                                                                                          | 1452623_at   | -1.70 | 0.00 |
| <i>Auts2</i>                                                   | autism susceptibility candidate 2                                                                                                                               | 1438680_at   | -1.70 | 0.00 |
| <i>Deb1</i>                                                    | differentially expressed in B16F10 1                                                                                                                            | 1427955_a_at | -1.71 | 0.00 |

|                      |                                                                                                                                        |         |      |       |      |
|----------------------|----------------------------------------------------------------------------------------------------------------------------------------|---------|------|-------|------|
| <i>Zfp706</i>        | zinc finger protein 706                                                                                                                | 1456177 | x at | -1.71 | 0.00 |
| <i>Sdc2</i>          | syndecan 2                                                                                                                             | 1448545 | at   | -1.71 | 0.00 |
| <i>Rgs10</i>         | regulator of G-protein signalling 10                                                                                                   | 1416882 | at   | -1.71 | 0.00 |
| ---                  | ---                                                                                                                                    | 1418534 | at   | -1.71 | 0.00 |
| <i>C230078M08Rik</i> | RIKEN cDNA C230078M08 gene                                                                                                             | 1435564 | at   | -1.71 | 0.00 |
| <i>2310067B10Rik</i> | RIKEN cDNA 2310067B10 gene                                                                                                             | 1426984 | at   | -1.71 | 0.00 |
| <i>Ivms1abp</i>      | influenza virus NS1A binding protein                                                                                                   | 1425718 | a at | -1.71 | 0.00 |
| <i>Pgm2l1</i>        | phosphoglucomutase 2-like 1                                                                                                            | 1456478 | at   | -1.71 | 0.00 |
| <i>Serbp1</i>        | Serpine1 mRNA binding protein 1                                                                                                        | 1440195 | at   | -1.71 | 0.00 |
| <i>Rhot2</i>         | ras homolog gene family, member T2                                                                                                     | 1426822 | at   | -1.71 | 0.00 |
| <i>Msi2</i>          | Musashi homolog 2 (Drosophila)                                                                                                         | 1436818 | a at | -1.71 | 0.00 |
| <i>Epb4.1l3</i>      | erythrocyte protein band 4.1-like 3                                                                                                    | 1419062 | at   | -1.71 | 0.00 |
| <i>Gsn</i>           | gelsolin                                                                                                                               | 1437171 | x at | -1.71 | 0.00 |
| <i>E330009J07Rik</i> | RIKEN cDNA E330009J07 gene                                                                                                             | 1449056 | at   | -1.71 | 0.00 |
| <i>Cnot6l</i>        | CCR4-NOT transcription complex, subunit 6-like                                                                                         | 1434311 | at   | -1.71 | 0.00 |
| <i>Synpo2</i>        | synaptopodin 2                                                                                                                         | 1441206 | at   | -1.71 | 0.00 |
| <i>A630025C20Rik</i> | RIKEN cDNA A630025C20 gene                                                                                                             | 1455121 | at   | -1.71 | 0.00 |
| <i>Mef2c</i>         | myocyte enhancer factor 2C                                                                                                             | 1451507 | at   | -1.71 | 0.00 |
| <i>Usp18</i>         | Ubiquitin specific peptidase 18                                                                                                        | 1444449 | at   | -1.71 | 0.00 |
| <i>Kcnj14</i>        | potassium inwardly-rectifying channel, subfamily J, member 14                                                                          | 1452243 | at   | -1.71 | 0.00 |
| <i>Nme3</i>          | expressed in non-metastatic cells 3                                                                                                    | 1448905 | at   | -1.71 | 0.00 |
| <i>Dag1</i>          | dystroglycan 1                                                                                                                         | 1456131 | x at | -1.71 | 0.00 |
| <i>Tbx20</i>         | T-box 20                                                                                                                               | 1425158 | at   | -1.71 | 0.00 |
| <i>Itga9</i>         | integrin alpha 9                                                                                                                       | 1460285 | at   | -1.71 | 0.00 |
| <i>Pia2</i>          | praja 2, RING-H2 motif containing                                                                                                      | 1424442 | a at | -1.71 | 0.00 |
| <i>Kifc3</i>         | kinesin family member C3                                                                                                               | 1416199 | at   | -1.71 | 0.00 |
| <i>Ccdc80</i>        | coiled-coil domain containing 80                                                                                                       | 1424186 | at   | -1.71 | 0.01 |
| <i>Tmem51</i>        | transmembrane protein 51                                                                                                               | 1424383 | at   | -1.71 | 0.00 |
| <i>F3</i>            | coagulation factor III                                                                                                                 | 1417408 | at   | -1.71 | 0.00 |
| ---                  | ---                                                                                                                                    | 1442593 | at   | -1.71 | 0.00 |
| <i>Rbbp6</i>         | retinoblastoma binding protein 6                                                                                                       | 1425115 | at   | -1.71 | 0.00 |
| <i>Mak10</i>         | MAK10 homolog, amino-acid N-acetyltransferase subunit, (S. cerevisiae)                                                                 | 1433570 | s at | -1.71 | 0.00 |
| <i>Glt28d2</i>       | glycosyltransferase 28 domain containing 2                                                                                             | 1455455 | at   | -1.71 | 0.00 |
| <i>1810014B01Rik</i> | RIKEN cDNA 1810014B01 gene                                                                                                             | 1429260 | at   | -1.71 | 0.00 |
| <i>Ythd3</i>         | YTH domain family 3                                                                                                                    | 1426840 | at   | -1.72 | 0.00 |
| <i>Wdr40b</i>        | WD repeat domain 40B                                                                                                                   | 1434170 | at   | -1.72 | 0.00 |
| <i>Fzd7</i>          | frizzled homolog 7 (Drosophila)                                                                                                        | 1450044 | at   | -1.72 | 0.00 |
| <i>Trf</i>           | transferrin                                                                                                                            | 1425546 | a at | -1.72 | 0.00 |
| <i>5430431D22Rik</i> | RIKEN cDNA 5430431D22 gene                                                                                                             | 1431110 | at   | -1.72 | 0.00 |
| <i>9630058J23Rik</i> | RIKEN cDNA 9630058J23 gene                                                                                                             | 1436795 | at   | -1.72 | 0.00 |
| <i>Msi2</i>          | Musashi homolog 2 (Drosophila)                                                                                                         | 1435520 | at   | -1.72 | 0.00 |
| <i>Mef2c</i>         | Myocyte enhancer factor 2C                                                                                                             | 1446484 | at   | -1.72 | 0.00 |
| <i>Cep68</i>         | centrosomal protein 68                                                                                                                 | 1436034 | at   | -1.72 | 0.00 |
| <i>Ptger3</i>        | prostaglandin E receptor 3 (subtype EP3)                                                                                               | 1450344 | a at | -1.72 | 0.00 |
| <i>Oxa1l</i>         | oxidase assembly 1-like                                                                                                                | 1423738 | at   | -1.72 | 0.00 |
| <i>Omd</i>           | osteonodulin                                                                                                                           | 1418745 | at   | -1.72 | 0.00 |
| <i>2310047C04Rik</i> | RIKEN cDNA 2310047C04 gene                                                                                                             | 1458439 | a at | -1.72 | 0.00 |
| <i>Cdh2</i>          | Cadherin 2                                                                                                                             | 1439307 | at   | -1.72 | 0.00 |
| <i>Rcor3</i>         | REST corepressor 3                                                                                                                     | 1442538 | at   | -1.72 | 0.00 |
| <i>Serbp1</i>        | Serpine1 mRNA binding protein 1                                                                                                        | 1418565 | at   | -1.72 | 0.00 |
| <i>Arhgap20</i>      | Rho GTPase activating protein 20                                                                                                       | 1429918 | at   | -1.72 | 0.00 |
| <i>Pitpnc1</i>       | phosphatidylinositol transfer protein, cytoplasmic 1                                                                                   | 1431074 | a at | -1.72 | 0.01 |
| <i>Opa3</i>          | optic atrophy 3 (human)                                                                                                                | 1455131 | at   | -1.72 | 0.00 |
| <i>Sncaip</i>        | synuclein, alpha interacting protein (synphilin)                                                                                       | 1423499 | at   | -1.72 | 0.00 |
| <i>322402P14Rik</i>  | RIKEN cDNA 322402P14 gene                                                                                                              | 1455091 | at   | -1.72 | 0.00 |
| <i>Runx1t1</i>       | runt-related transcription factor 1; translocated to, 1 (cyclin D-related)                                                             | 1444615 | x at | -1.72 | 0.00 |
| <i>Zfp397</i>        | zinc finger protein 397                                                                                                                | 1435664 | at   | -1.72 | 0.00 |
| <i>Cox7c</i>         | cytochrome c oxidase, subunit VIIc                                                                                                     | 1459885 | s at | -1.73 | 0.00 |
| <i>Stmn1</i>         | stathmin 1                                                                                                                             | 1415849 | s at | -1.73 | 0.00 |
| <i>Chchd7</i>        | Coiled-coil-helix-coiled-coil-helix domain containing 7                                                                                | 1444318 | at   | -1.73 | 0.00 |
| <i>Bri3bp</i>        | Bri3 binding protein                                                                                                                   | 1428744 | s at | -1.73 | 0.00 |
| <i>Rnf128</i>        | ring finger protein 128                                                                                                                | 1418318 | at   | -1.73 | 0.00 |
| <i>Mbnl1</i>         | muscleblind-like 1 (Drosophila)                                                                                                        | 1457924 | at   | -1.73 | 0.00 |
| <i>Lamb2</i>         | laminin, beta 2                                                                                                                        | 1416513 | at   | -1.73 | 0.00 |
| <i>Tspan3</i>        | tetraspanin 3                                                                                                                          | 1416009 | at   | -1.73 | 0.00 |
| <i>Nudt21</i>        | nudix (nucleoside diphosphate linked moiety X)-type motif 21                                                                           | 1428339 | at   | -1.73 | 0.00 |
| <i>Nr3c1</i>         | nuclear receptor subfamily 3, group C, member 1                                                                                        | 1421866 | at   | -1.73 | 0.00 |
| <i>Sdc1</i>          | syndecan 1                                                                                                                             | 1415943 | at   | -1.73 | 0.00 |
| <i>D19Wsu12e</i>     | DNA segment, Chr 19, Wayne State University 12, expressed                                                                              | 1433702 | at   | -1.73 | 0.00 |
| <i>C630002B14Rik</i> | RIKEN cDNA C630002B14 gene                                                                                                             | 1443558 | s at | -1.73 | 0.00 |
| <i>Tbc1d4</i>        | TBC1 domain family, member 4                                                                                                           | 1455903 | at   | -1.73 | 0.00 |
| <i>5430405N12Rik</i> | RIKEN cDNA 5430405N12 gene                                                                                                             | 1456070 | at   | -1.73 | 0.00 |
| <i>2210010L05Rik</i> | RIKEN cDNA 2210010L05 gene                                                                                                             | 1424464 | s at | -1.73 | 0.00 |
| <i>Tesc</i>          | tescalcin                                                                                                                              | 1418743 | a at | -1.73 | 0.00 |
| <i>Tmem108</i>       | transmembrane protein 108                                                                                                              | 1454729 | at   | -1.73 | 0.00 |
| <i>Prdm1</i>         | PR domain containing 1, with ZNF domain                                                                                                | 1420425 | at   | -1.73 | 0.00 |
| <i>Pea15</i>         | phosphoprotein enriched in astrocytes 15                                                                                               | 1416406 | at   | -1.73 | 0.00 |
| <i>Hfe2</i>          | hemochromatosis type 2 (juvenile) (human homolog)                                                                                      | 1454137 | s at | -1.73 | 0.00 |
| <i>Ube2g1</i>        | ubiquitin-conjugating enzyme E2G 1 (UBC7 homolog, C. elegans)                                                                          | 1455094 | s at | -1.73 | 0.00 |
| ---                  | Transcribed locus                                                                                                                      | 1435935 | at   | -1.73 | 0.00 |
| <i>2310067E19Rik</i> | RIKEN cDNA 2310067E19 gene                                                                                                             | 1453448 | at   | -1.74 | 0.00 |
| <i>Ebf1</i>          | early B-cell factor 1                                                                                                                  | 1448293 | at   | -1.74 | 0.00 |
| <i>Pde4d</i>         | Phosphodiesterase 4D, cAMP specific                                                                                                    | 1443289 | at   | -1.74 | 0.00 |
| <i>Plxnc1</i>        | plexin C1                                                                                                                              | 1423213 | at   | -1.74 | 0.00 |
| <i>Fcmd</i>          | Fukuyama type congenital muscular dystrophy homolog (human)                                                                            | 1446624 | at   | -1.74 | 0.00 |
| <i>Pura</i>          | purine rich element binding protein A                                                                                                  | 1453783 | at   | -1.74 | 0.00 |
| <i>G430002G23Rik</i> | RIKEN cDNA G430002G23 gene                                                                                                             | 1416804 | at   | -1.74 | 0.00 |
| <i>D4Bwg0951e</i>    | DNA segment, Chr 4, Brigham & Women's Genetics 0951 expressed                                                                          | 1428384 | at   | -1.74 | 0.00 |
| <i>Arhgef9</i>       | Cdc42 guanine nucleotide exchange factor (GEF) 9                                                                                       | 1436577 | at   | -1.74 | 0.00 |
| <i>Dip2c</i>         | DIP2 disco-interacting protein 2 homolog C (Drosophila)                                                                                | 1429064 | at   | -1.74 | 0.00 |
| <i>Trak1</i>         | trafficking protein, kinesin binding 1                                                                                                 | 1456755 | at   | -1.74 | 0.00 |
| <i>Kitl</i>          | kit ligand                                                                                                                             | 1426152 | a at | -1.74 | 0.00 |
| <i>Spsb4</i>         | splA/ryanodine receptor domain and SOCS box containing 4                                                                               | 1451419 | at   | -1.74 | 0.01 |
| ---                  | 0 day neonate cerebellum cDNA, RIKEN full-length enriched library, clone:C230004E12 product.hypothetical protein, full insert sequence | 1443306 | _at  | -1.74 | 0.00 |
| <i>Xrcc2</i>         | X-ray repair complementing defective repair in Chinese hamster cells 2                                                                 | 1455335 | at   | -1.74 | 0.00 |
| <i>Htra1</i>         | HtrA serine peptidase 1                                                                                                                | 1416749 | at   | -1.74 | 0.00 |

|                               |                                                                                                                                      |              |       |      |
|-------------------------------|--------------------------------------------------------------------------------------------------------------------------------------|--------------|-------|------|
| <i>Etv1</i>                   | ets variant gene 1                                                                                                                   | 1450684 at   | -1.74 | 0.00 |
| <i>Col6a2</i>                 | procollagen, type VI, alpha 2                                                                                                        | 1426947 x at | -1.74 | 0.01 |
| <i>Auts2</i>                  | Autism susceptibility candidate 2                                                                                                    | 1441869 x at | -1.74 | 0.00 |
| <i>6430510M02Rik</i>          | RIKEN cDNA 6430510M02 gene                                                                                                           | 1457218 at   | -1.74 | 0.00 |
| <i>Serpina1a // Serpina1b</i> | serine (or cysteine) peptidase inhibitor, clade A, member 1a // serine (or cysteine) peptidase inhibitor, clade A, member 1b         | 1451513_x_at | -1.74 | 0.01 |
| <i>Plekhh1</i>                | pleckstrin homology domain containing, family H (with MyTH4 domain) member 1                                                         | 1452517 at   | -1.74 | 0.00 |
| <i>LOC676870</i>              | region containing RIKEN cDNA 2310056B04 gene; pre B-cell leukemia transcription factor 1                                             | 1428647_at   | -1.74 | 0.00 |
| <i>Pfkf</i>                   | phosphofructokinase, liver, B-type                                                                                                   | 1439148 a at | -1.74 | 0.00 |
| <i>Zfp706</i>                 | zinc finger protein 706                                                                                                              | 1426678 at   | -1.74 | 0.00 |
| <i>Gpd2</i>                   | glycerol phosphate dehydrogenase 2, mitochondrial                                                                                    | 1428323 at   | -1.74 | 0.00 |
| <i>Magi2</i>                  | Membrane associated guanylate kinase, WW and PDZ domain containing 2                                                                 | 1440807 at   | -1.74 | 0.00 |
| <i>4833423F13Rik</i>          | RIKEN cDNA 4833423F13 gene                                                                                                           | 1430622 at   | -1.74 | 0.00 |
| <i>Nr1d1</i>                  | nuclear receptor subfamily 1, group D, member 1                                                                                      | 1426464 at   | -1.74 | 0.00 |
| <i>Phldb1</i>                 | pleckstrin homology-like domain, family B, member 1                                                                                  | 1424468 s at | -1.75 | 0.00 |
| ---                           | PREDICTED: Mus musculus hypothetical LOC434436 (LOC434436), mRNA                                                                     | 1447393 at   | -1.75 | 0.00 |
| <i>Mkks</i>                   | McKusick-Kaufman syndrome protein                                                                                                    | 1454014 a at | -1.75 | 0.00 |
| <i>2310047C04Rik</i>          | RIKEN cDNA 2310047C04 gene                                                                                                           | 1454878 at   | -1.75 | 0.00 |
| <i>Pi16</i>                   | peptidase inhibitor 16                                                                                                               | 1453839 a at | -1.75 | 0.01 |
| <i>Prkag2</i>                 | protein kinase, AMP-activated, gamma 2 non-catalytic subunit                                                                         | 1423831 at   | -1.75 | 0.00 |
| <i>Tmem48</i>                 | transmembrane protein 48                                                                                                             | 1433813 at   | -1.75 | 0.00 |
| <i>Ptprd</i>                  | Protein tyrosine phosphatase, receptor type, D                                                                                       | 1443053 at   | -1.75 | 0.00 |
| ---                           | ---                                                                                                                                  | 1437987 at   | -1.75 | 0.00 |
| <i>Sec14l1</i>                | SEC14-like 1 (S. cerevisiae)                                                                                                         | 1453412 a at | -1.75 | 0.00 |
| <i>Zb1b20</i>                 | Zinc finger and BTB domain containing 20                                                                                             | 1440565 at   | -1.75 | 0.00 |
| <i>Prickle1</i>               | Prickle like 1 (Drosophila)                                                                                                          | 1442400 at   | -1.75 | 0.00 |
| <i>Tbx20</i>                  | T-box 20                                                                                                                             | 1453351 at   | -1.75 | 0.00 |
| <i>Kcnp2</i>                  | Kv channel-interacting protein 2                                                                                                     | 1425870 a at | -1.75 | 0.01 |
| <i>A530016L24Rik</i>          | RIKEN cDNA A530016L24 gene                                                                                                           | 1451606 at   | -1.75 | 0.00 |
| ---                           | ---                                                                                                                                  | 1433968 a at | -1.75 | 0.00 |
| <i>Dnmt3a</i>                 | DNA methyltransferase 3A                                                                                                             | 1423066 at   | -1.75 | 0.00 |
| <i>Fbxl7</i>                  | F-box and leucine-rich repeat protein 7                                                                                              | 1457966 at   | -1.75 | 0.00 |
| <i>Mgrn1</i>                  | mahogunin, ring finger 1                                                                                                             | 1454645 at   | -1.75 | 0.00 |
| <i>Podxl</i>                  | podocalyxin-like                                                                                                                     | 1448688 at   | -1.75 | 0.01 |
| <i>2810416A17Rik</i>          | RIKEN cDNA 2810416A17 gene                                                                                                           | 1433266 at   | -1.75 | 0.00 |
| <i>2410022L05Rik</i>          | RIKEN cDNA 2410022L05 gene                                                                                                           | 1420113 s at | -1.76 | 0.00 |
| <i>B3galnt2</i>               | UDP-GalNAc:betaGlcNAc beta 1,3-galactosaminyltransferase, polypeptide 2                                                              | 1454842 a at | -1.76 | 0.00 |
| <i>Slc8a1</i>                 | Solute carrier family 8 (sodium/calcium exchanger), member 1                                                                         | 1444985 at   | -1.76 | 0.00 |
| <i>Rbm3</i>                   | RNA binding motif protein 3                                                                                                          | 1429169 at   | -1.76 | 0.00 |
| ---                           | Transcribed locus                                                                                                                    | 1438078 at   | -1.76 | 0.00 |
| <i>Tmcc2</i>                  | transmembrane and coiled-coil domains 2                                                                                              | 1452666 a at | -1.76 | 0.00 |
| <i>Slc25a29</i>               | solute carrier family 25 (mitochondrial carrier, palmitoylcarnitine transporter), member 29                                          | 1438187_at   | -1.76 | 0.00 |
| <i>4930402H24Rik</i>          | RIKEN cDNA 4930402H24 gene                                                                                                           | 1453465 x at | -1.76 | 0.00 |
| <i>Gpsm1</i>                  | G-protein signalling modulator 1 (AGS3-like, C. elegans)                                                                             | 1436917 s at | -1.76 | 0.01 |
| <i>H2-Aa</i>                  | histocompatibility 2, class II antigen A, alpha                                                                                      | 1435290 x at | -1.76 | 0.00 |
| <i>Mrpl45</i>                 | mitochondrial ribosomal protein L45                                                                                                  | 1423492 at   | -1.76 | 0.00 |
| <i>Zfyve21</i>                | zinc finger, FYVE domain containing 21                                                                                               | 1424670 s at | -1.76 | 0.00 |
| <i>Ube2n</i>                  | ubiquitin-conjugating enzyme E2N                                                                                                     | 1435384 at   | -1.76 | 0.00 |
| <i>Smpd1</i>                  | sphingomyelin phosphodiesterase 1, acid lysosomal                                                                                    | 1448621 a at | -1.76 | 0.00 |
| ---                           | ---                                                                                                                                  | 1434581 at   | -1.76 | 0.00 |
| <i>1190017O12Rik</i>          | RIKEN cDNA 1190017O12 gene                                                                                                           | 1417402 at   | -1.76 | 0.00 |
| <i>Zfp238</i>                 | zinc finger protein 238                                                                                                              | 1417010 at   | -1.76 | 0.00 |
| <i>1110012J17Rik</i>          | RIKEN cDNA 1110012J17 gene                                                                                                           | 1429053 at   | -1.76 | 0.00 |
| <i>Pdzd3</i>                  | PDZ domain containing 3                                                                                                              | 1449330 at   | -1.76 | 0.00 |
| <i>Sncg</i>                   | synuclein, gamma                                                                                                                     | 1417788 at   | -1.76 | 0.00 |
| <i>Arhgap5</i>                | Rho GTPase activating protein 5                                                                                                      | 1450896 at   | -1.76 | 0.00 |
| <i>Atp8a1</i>                 | ATPase, aminophospholipid transporter (APLT), class I, type 8A, member 1                                                             | 1444355 at   | -1.76 | 0.00 |
| ---                           | ---                                                                                                                                  | 1443534 at   | -1.76 | 0.01 |
| <i>Ets1</i>                   | E26 avian leukemia oncogene 1, 5' domain                                                                                             | 1452163 at   | -1.76 | 0.00 |
| <i>Cpox</i>                   | coproporphyrinogen oxidase                                                                                                           | 1422492 at   | -1.76 | 0.00 |
| <i>Snai2</i>                  | snail homolog 2 (Drosophila)                                                                                                         | 1418673 at   | -1.76 | 0.00 |
| ---                           | 12 days embryo spinal cord cDNA, RIKEN full-length enriched library, clone: C530050B12 product: unclassifiable, full insert sequence | 1439035_at   | -1.76 | 0.00 |
| <i>Elk3</i>                   | ELK3, member of ETS oncogene family                                                                                                  | 1448797 at   | -1.76 | 0.00 |
| <i>Cables1 // LOC635753</i>   | Cdk5 and Abl enzyme substrate 1 // similar to Cdk5 and Abl enzyme substrate 1                                                        | 1422477 at   | -1.76 | 0.00 |
| <i>Srpk2</i>                  | serine/arginine-rich protein specific kinase 2                                                                                       | 1417134 at   | -1.77 | 0.00 |
| <i>C230093N12Rik</i>          | RIKEN cDNA C230093N12 gene                                                                                                           | 1426893 at   | -1.77 | 0.00 |
| ---                           | ---                                                                                                                                  | 1446963 at   | -1.77 | 0.00 |
| ---                           | Transcribed locus                                                                                                                    | 1456885 at   | -1.77 | 0.00 |
| <i>Gnb11</i>                  | Guanine nucleotide binding protein (G protein), beta polypeptide 1-like                                                              | 1441391 at   | -1.77 | 0.00 |
| <i>Glt25d2</i>                | glycosyltransferase 25 domain containing 2                                                                                           | 1437930 at   | -1.77 | 0.00 |
| <i>D4Erid429e</i>             | DNA segment, Chr 4, ERATO Doi 429, expressed                                                                                         | 1454868 at   | -1.77 | 0.00 |
| <i>Zfyve21</i>                | zinc finger, FYVE domain containing 21                                                                                               | 1424669 at   | -1.77 | 0.00 |
| <i>Yip4</i>                   | Yip1 domain family, member 4                                                                                                         | 1450418 a at | -1.77 | 0.00 |
| <i>Aspa</i>                   | aspartoacylase (aminoacylase) 2                                                                                                      | 1418472 at   | -1.77 | 0.00 |
| <i>AU041783</i>               | expressed sequence AU041783                                                                                                          | 1436870 s at | -1.77 | 0.01 |
| <i>Hemk1</i>                  | HemK methyltransferase family member 1                                                                                               | 1430287 s at | -1.77 | 0.00 |
| <i>Nek1</i>                   | NIMA (never in mitosis gene a)-related expressed kinase 1                                                                            | 1434267 at   | -1.77 | 0.00 |
| <i>Bdh1</i>                   | 3-hydroxybutyrate dehydrogenase, type 1                                                                                              | 1452257 at   | -1.77 | 0.00 |
| <i>2410005O16Rik</i>          | RIKEN cDNA 2410005O16 gene                                                                                                           | 1457999 at   | -1.77 | 0.00 |
| <i>Olfm1</i>                  | olfactomedin 1                                                                                                                       | 1425784 a at | -1.77 | 0.00 |
| ---                           | Transcribed locus                                                                                                                    | 1440411 at   | -1.77 | 0.00 |
| <i>B230317C12Rik</i>          | RIKEN cDNA B230317C12 gene                                                                                                           | 1417147 at   | -1.77 | 0.00 |
| <i>Chordc1</i>                | Cysteine and histidine-rich domain (CHORD)-containing, zinc-binding protein 1                                                        | 1435574 at   | -1.77 | 0.00 |
| <i>Ankrd50</i>                | ankrin repeat domain 50                                                                                                              | 1435880 at   | -1.77 | 0.00 |
| <i>Pgm5</i>                   | phosphoglucomutase 5                                                                                                                 | 1437871 at   | -1.77 | 0.00 |
| <i>Ncald</i>                  | neurocalcin delta                                                                                                                    | 1417568 at   | -1.77 | 0.00 |
| <i>Slc22a1</i>                | solute carrier family 22 (organic cation transporter), member 1                                                                      | 1418118 at   | -1.77 | 0.00 |
| <i>Mrpl19</i>                 | mitochondrial ribosomal protein L19                                                                                                  | 1421914 s at | -1.78 | 0.00 |
| <i>Rcbt2</i>                  | regulator of chromosome condensation (RCC1) and BTB (POZ) domain containing protein 2                                                | 1416390_at   | -1.78 | 0.00 |
| <i>Cx3cr1</i>                 | chemokine (C-X3-C) receptor 1                                                                                                        | 1450020 at   | -1.78 | 0.00 |
| <i>Lpgat1</i>                 | lysophosphatidylglycerol acyltransferase 1                                                                                           | 1424350 s at | -1.78 | 0.00 |
| <i>Etv1</i>                   | ets variant gene 1                                                                                                                   | 1422607 at   | -1.78 | 0.00 |
| <i>Lace1</i>                  | lactation elevated 1                                                                                                                 | 1427073 at   | -1.78 | 0.00 |

|                         |                                                                                                                                    |              |       |      |
|-------------------------|------------------------------------------------------------------------------------------------------------------------------------|--------------|-------|------|
| 4930533K18Rik /// Bicc1 | RIKEN cDNA 4930533K18 gene /// bicaudal C homolog 1 (Drosophila)                                                                   | 1436029 at   | -1.78 | 0.00 |
| Ccdc3                   | coiled-coil domain containing 3                                                                                                    | 1428549 at   | -1.78 | 0.00 |
| Tbx3                    | T-box 3                                                                                                                            | 1437479 x at | -1.78 | 0.00 |
| Larp5                   | La ribonucleoprotein domain family, member 5                                                                                       | 1434597 at   | -1.78 | 0.00 |
| Atxn1                   | Ataxin 1                                                                                                                           | 1457605 at   | -1.78 | 0.00 |
| Pde3b                   | phosphodiesterase 3B, cGMP-inhibited                                                                                               | 1433694 at   | -1.78 | 0.00 |
| Ebfl                    | Early B-cell factor 1                                                                                                              | 1441627 at   | -1.78 | 0.00 |
| Mterfd3                 | MTERF domain containing 3                                                                                                          | 1455700 at   | -1.78 | 0.00 |
| Cideb                   | cell death-inducing DNA fragmentation factor, alpha subunit-like effector B                                                        | 1418976 s at | -1.78 | 0.00 |
| Tmem25                  | transmembrane protein 25                                                                                                           | 1452962 at   | -1.78 | 0.00 |
| Rragd                   | Ras-related GTP binding D                                                                                                          | 1434909 at   | -1.78 | 0.00 |
| Itpkb                   | inositol 1,4,5-trisphosphate 3-kinase B                                                                                            | 1441058 at   | -1.78 | 0.00 |
| Iffl81                  | intraflagellar transport 81 homolog (Chlamydomonas)                                                                                | 1449407 at   | -1.78 | 0.00 |
| ---                     | Adult male hypothalamus cDNA, RIKEN full-length enriched library, clone:A230069E07 product:unclassifiable, full insert sequence    | 1456813 at   | -1.78 | 0.01 |
| Rgs4                    | regulator of G-protein signaling 4                                                                                                 | 1416286 at   | -1.78 | 0.00 |
| Itpkb                   | inositol 1,4,5-trisphosphate 3-kinase B                                                                                            | 1435272 at   | -1.78 | 0.00 |
| Bmp6                    | bone morphogenetic protein 6                                                                                                       | 1450759 at   | -1.78 | 0.00 |
| Fcmd                    | Fukuyama type congenital muscular dystrophy homolog (human)                                                                        | 1435801 at   | -1.78 | 0.00 |
| 1200009O22Rik           | RIKEN cDNA 1200009O22 gene                                                                                                         | 1452961 at   | -1.78 | 0.00 |
| Adcv5                   | adenylate cyclase 5                                                                                                                | 1455296 at   | -1.78 | 0.00 |
| Gpm6a                   | glycoprotein m6a                                                                                                                   | 1426442 at   | -1.78 | 0.00 |
| D530005L17Rik           | RIKEN cDNA D530005L17 gene                                                                                                         | 1451469 at   | -1.78 | 0.00 |
| Nfia                    | nuclear factor I/A                                                                                                                 | 1446990 at   | -1.78 | 0.00 |
| Yip7                    | Yip1 domain family, member 7                                                                                                       | 1422927 at   | -1.78 | 0.00 |
| Tgfb1                   | transforming growth factor, beta induced                                                                                           | 1437463 x at | -1.78 | 0.00 |
| A830039H10Rik           | RIKEN cDNA A830039H10 gene                                                                                                         | 1456712 at   | -1.78 | 0.00 |
| ---                     | ---                                                                                                                                | 1455690 at   | -1.78 | 0.00 |
| Phf17                   | PHD finger protein 17                                                                                                              | 1426752 at   | -1.78 | 0.00 |
| Vegfa                   | vascular endothelial growth factor A                                                                                               | 1451959 a at | -1.78 | 0.00 |
| Asph                    | aspartate-beta-hydroxylase                                                                                                         | 1450058 at   | -1.78 | 0.00 |
| Pvr13                   | poliovirus receptor-related 3                                                                                                      | 1448673 at   | -1.79 | 0.00 |
| Ppp1r12b                | protein phosphatase 1, regulatory (inhibitor) subunit 12B                                                                          | 1434786 at   | -1.79 | 0.00 |
| Ptpla                   | protein tyrosine phosphatase-like (proline instead of catalytic arginine), member a                                                | 1457434 s at | -1.79 | 0.00 |
| Oact2                   | O-acyltransferase (membrane bound) domain containing 2                                                                             | 1425029 a at | -1.79 | 0.00 |
| Centg2                  | centaurin, gamma 2                                                                                                                 | 1435433 at   | -1.79 | 0.00 |
| Zfp462                  | Zinc finger protein 462                                                                                                            | 1456789 at   | -1.79 | 0.00 |
| 2700049H19Rik           | RIKEN cDNA 2700049H19 gene                                                                                                         | 1427112 at   | -1.79 | 0.00 |
| Ephx1                   | epoxide hydrolase 1, microsomal                                                                                                    | 1422438 at   | -1.79 | 0.01 |
| Ncald                   | Neurocalcin delta                                                                                                                  | 1458037 at   | -1.79 | 0.00 |
| 1200009F10Rik           | RIKEN cDNA 1200009F10 gene                                                                                                         | 1429065 at   | -1.79 | 0.00 |
| Slit2                   | slit homolog 2 (Drosophila)                                                                                                        | 1424659 at   | -1.79 | 0.00 |
| ---                     | ---                                                                                                                                | 1457227 at   | -1.79 | 0.00 |
| Tfrc                    | transferrin receptor                                                                                                               | 1422966 a at | -1.79 | 0.01 |
| Tubb2c                  | tubulin, beta 2c                                                                                                                   | 1423642 at   | -1.79 | 0.00 |
| Mapre2                  | microtubule-associated protein, RP/EB family, member 2                                                                             | 1451990 at   | -1.79 | 0.00 |
| Itp2                    | inositol 1,4,5-trisphosphate receptor 2                                                                                            | 1424833 at   | -1.79 | 0.00 |
| Pitpnc1                 | phosphatidylinositol transfer protein, cytoplasmic 1                                                                               | 1452939 a at | -1.79 | 0.00 |
| ---                     | 0 day neonate thymus cDNA, RIKEN full-length enriched library, clone:A430079C03 product:unclassifiable, full insert sequence       | 1455601 at   | -1.79 | 0.00 |
| Abtb2                   | ankyrin repeat and BTB (POZ) domain containing 2                                                                                   | 1433453 a at | -1.79 | 0.00 |
| Amd1                    | S-adenosylmethionine decarboxylase 1                                                                                               | 1448484 at   | -1.79 | 0.00 |
| Rhobtb3                 | Rho-related BTB domain containing 3                                                                                                | 1433647 s at | -1.79 | 0.00 |
| Heph                    | hephaestin                                                                                                                         | 1448696 at   | -1.79 | 0.00 |
| Hmgb3                   | high mobility group box 3                                                                                                          | 1416155 at   | -1.80 | 0.00 |
| Crhr2                   | corticotropin releasing hormone receptor 2                                                                                         | 1422012 at   | -1.80 | 0.00 |
| Cdon                    | cell adhesion molecule-related/down-regulated by oncogenes                                                                         | 1434957 at   | -1.80 | 0.00 |
| Gmps                    | guanine monophosphate synthetase                                                                                                   | 1435656 at   | -1.80 | 0.00 |
| Slc6a6                  | solute carrier family 6 (neurotransmitter transporter, taurine), member 6                                                          | 1421346 a at | -1.80 | 0.01 |
| 4931420C21Rik           | RIKEN cDNA 4931420C21 gene                                                                                                         | 1418749 at   | -1.80 | 0.00 |
| Tob1                    | transducer of ErbB-2.1                                                                                                             | 1423176 at   | -1.80 | 0.00 |
| Camd1                   | cullin associated and neddylation disassociated 1                                                                                  | 1435781 at   | -1.80 | 0.00 |
| Acvr2a                  | Activin receptor IIA                                                                                                               | 1437382 at   | -1.80 | 0.00 |
| Tial1                   | Tial1 cytotoxic granule-associated RNA binding protein-like 1                                                                      | 1452821 at   | -1.80 | 0.00 |
| ---                     | ---                                                                                                                                | 1438537 at   | -1.80 | 0.00 |
| Pde7a                   | phosphodiesterase 7A                                                                                                               | 1423313 at   | -1.80 | 0.00 |
| 1110007M04Rik           | RIKEN cDNA 1110007M04 gene                                                                                                         | 1435333 at   | -1.80 | 0.00 |
| Gstt1                   | glutathione S-transferase, theta 1                                                                                                 | 1418186 at   | -1.80 | 0.01 |
| Acvr2a                  | Activin receptor IIA                                                                                                               | 1439643 at   | -1.80 | 0.00 |
| Nudt8                   | nudix (nucleoside diphosphate linked moiety X)-type motif 8                                                                        | 1450111 a at | -1.80 | 0.00 |
| A930008G19Rik           | RIKEN cDNA A930008G19 gene                                                                                                         | 1455428 at   | -1.80 | 0.00 |
| Homer1                  | homer homolog 1 (Drosophila)                                                                                                       | 1421768 a at | -1.80 | 0.00 |
| Zfp306                  | zinc finger protein 306                                                                                                            | 1437892 at   | -1.80 | 0.00 |
| Slc38a1                 | solute carrier family 38, member 1                                                                                                 | 1454764 s at | -1.80 | 0.00 |
| Abcb7                   | ATP-binding cassette, sub-family B (MDR/TAP), member 7                                                                             | 1435006 s at | -1.80 | 0.00 |
| Nudt3                   | nudix (nucleotide diphosphate linked moiety X)-type motif 3                                                                        | 1451575 a at | -1.80 | 0.00 |
| C230093N12Rik           | RIKEN cDNA C230093N12 gene                                                                                                         | 1426894 s at | -1.80 | 0.00 |
| Osbp1a                  | oxysterol binding protein-like 1A                                                                                                  | 1460192 at   | -1.80 | 0.00 |
| Ankrd25                 | ankyrin repeat domain 25                                                                                                           | 1460559 at   | -1.80 | 0.00 |
| Narf                    | nuclear prelamin A recognition factor                                                                                              | 1425344 at   | -1.80 | 0.00 |
| 1700110N18Rik           | RIKEN cDNA 1700110N18 gene                                                                                                         | 1430596 s at | -1.80 | 0.00 |
| Ccdc21                  | coiled-coil domain containing 21                                                                                                   | 1451212 at   | -1.81 | 0.00 |
| Ehbp1                   | EH domain binding protein 1                                                                                                        | 1442772 at   | -1.81 | 0.00 |
| Ivns1abp                | influenza virus NS1A binding protein                                                                                               | 1450084 s at | -1.81 | 0.00 |
| Loarf2                  | LON peptidase N-terminal domain and ring finger 2                                                                                  | 1429965 at   | -1.81 | 0.00 |
| Mrp13                   | Mitochondrial ribosomal protein L3                                                                                                 | 1440636 at   | -1.81 | 0.00 |
| Map2k6                  | mitogen activated protein kinase kinase 6                                                                                          | 1426850 a at | -1.81 | 0.00 |
| Irx4                    | Iroquois related homeobox 4 (Drosophila)                                                                                           | 1419539 at   | -1.81 | 0.00 |
| ---                     | Adult male urinary bladder cDNA, RIKEN full-length enriched library, clone:9530098H01 product:unclassifiable, full insert sequence | 1439362 at   | -1.81 | 0.00 |
| Waspip                  | Wiskott-Aldrich syndrome protein interacting protein                                                                               | 1436954 at   | -1.81 | 0.00 |
| Gnb5                    | guanine nucleotide binding protein, beta 5                                                                                         | 1422208 a at | -1.81 | 0.00 |
| 2900054C01Rik           | RIKEN cDNA 2900054C01 gene                                                                                                         | 1429625 at   | -1.81 | 0.00 |
| Mum11                   | melanoma associated antigen (mutated) 1-like 1                                                                                     | 1455238 at   | -1.81 | 0.00 |
| Bmp6                    | Bone morphogenetic protein 6                                                                                                       | 1459947 at   | -1.81 | 0.00 |
| Smpd3a                  | sphingomyelin phosphodiesterase, acid-like 3A                                                                                      | 1416635 at   | -1.81 | 0.00 |
| Pdss1                   | prenyl (solanesyl) diphosphate synthase, subunit 1                                                                                 | 1431893 a at | -1.81 | 0.00 |

|                                              |                                                                                                                                                                                                                              |              |       |      |
|----------------------------------------------|------------------------------------------------------------------------------------------------------------------------------------------------------------------------------------------------------------------------------|--------------|-------|------|
| <i>Tgfb3</i>                                 | transforming growth factor, beta 3                                                                                                                                                                                           | 1417455 at   | -1.81 | 0.00 |
| <i>Mrpl34</i>                                | mitochondrial ribosomal protein L34                                                                                                                                                                                          | 1416349 at   | -1.81 | 0.00 |
| <i>Ccnd2</i>                                 | cyclin D2                                                                                                                                                                                                                    | 1434745 at   | -1.81 | 0.00 |
| <i>5730472N09Rik</i>                         | RIKEN cDNA 5730472N09 gene                                                                                                                                                                                                   | 1454621 s at | -1.81 | 0.00 |
| <i>Myl4</i>                                  | myosin, light polypeptide 4                                                                                                                                                                                                  | 1422580 at   | -1.81 | 0.00 |
| <i>Ptprla</i>                                | protein tyrosine phosphatase-like (proline instead of catalytic arginine), member a                                                                                                                                          | 1456315 a at | -1.81 | 0.00 |
| <i>3222402P14Rik</i>                         | RIKEN cDNA 3222402P14 gene                                                                                                                                                                                                   | 1437869 at   | -1.81 | 0.00 |
| <i>Kcnk2</i>                                 | potassium channel, subfamily K, member 2                                                                                                                                                                                     | 1449158 at   | -1.81 | 0.00 |
| <i>AW547186</i>                              | expressed sequence AW547186                                                                                                                                                                                                  | 1433854 at   | -1.81 | 0.00 |
| <i>Gsn</i>                                   | gelsolin                                                                                                                                                                                                                     | 1436991 x at | -1.81 | 0.00 |
| <i>Zfp422-rs1</i>                            | zinc finger protein 422, related sequence 1                                                                                                                                                                                  | 1429560 at   | -1.81 | 0.00 |
| <i>Nrxn1</i>                                 | neurexin 1                                                                                                                                                                                                                   | 1454691 at   | -1.81 | 0.00 |
| ---                                          | 16 days neonate heart cDNA, RIKEN full-length enriched library, clone:D830033B01 product:unclassifiable, full insert sequence                                                                                                | 1444153_at   | -1.81 | 0.01 |
| <i>Tspan18</i>                               | tetraspanin 18                                                                                                                                                                                                               | 1442174 at   | -1.81 | 0.00 |
| <i>Mgl1</i>                                  | monoglyceride lipase                                                                                                                                                                                                         | 1453836 a at | -1.82 | 0.00 |
| <i>Ahr</i>                                   | aryl-hydrocarbon receptor                                                                                                                                                                                                    | 1422631 at   | -1.82 | 0.00 |
| ---                                          | ---                                                                                                                                                                                                                          | 1458099 at   | -1.82 | 0.00 |
| <i>Farp2</i>                                 | FERM, RhoGEF and pleckstrin domain protein 2                                                                                                                                                                                 | 1435985 at   | -1.82 | 0.00 |
| <i>Grhl2</i>                                 | grainyhead-like 2 (Drosophila)                                                                                                                                                                                               | 1427046 at   | -1.82 | 0.00 |
| <i>LOC667373 /// LOC669129 /// LOC676702</i> | similar to interferon-induced protein with tetratricopeptide repeats 1 /// similar to interferon-induced protein with tetratricopeptide repeats 1 /// similar to interferon-induced protein with tetratricopeptide repeats 1 | 1435529_at   | -1.82 | 0.00 |
| <i>2400010G15Rik</i>                         | RIKEN cDNA 2400010G15 gene                                                                                                                                                                                                   | 1424259 at   | -1.82 | 0.00 |
| <i>9930024M15Rik</i>                         | RIKEN cDNA 9930024M15 gene                                                                                                                                                                                                   | 1457801 at   | -1.82 | 0.00 |
| <i>Camk2n1</i>                               | calcium/calmodulin-dependent protein kinase II inhibitor 1                                                                                                                                                                   | 1456609 at   | -1.82 | 0.00 |
| <i>Acrv1</i>                                 | activin A receptor, type 1                                                                                                                                                                                                   | 1448460 at   | -1.82 | 0.00 |
| <i>Frzb</i>                                  | frizzled-related protein                                                                                                                                                                                                     | 1416658 at   | -1.82 | 0.00 |
| <i>Tbc1d16</i>                               | TBC1 domain family, member 16                                                                                                                                                                                                | 1435763 at   | -1.82 | 0.00 |
| <i>2700089E24Rik</i>                         | RIKEN cDNA 2700089E24 gene                                                                                                                                                                                                   | 1453208 at   | -1.82 | 0.00 |
| <i>Gata4</i>                                 | GATA binding protein 4                                                                                                                                                                                                       | 1418863 at   | -1.82 | 0.00 |
| <i>1500001A10Rik</i>                         | RIKEN cDNA 1500001A10 gene                                                                                                                                                                                                   | 1435062 at   | -1.82 | 0.00 |
| <i>Mgl1</i>                                  | monoglyceride lipase                                                                                                                                                                                                         | 1426785 s at | -1.82 | 0.00 |
| <i>A1663975</i>                              | Expressed sequence A1663975                                                                                                                                                                                                  | 1440084 at   | -1.82 | 0.00 |
| <i>Mrpl18</i>                                | mitochondrial ribosomal protein L18                                                                                                                                                                                          | 1448373 at   | -1.82 | 0.00 |
| <i>Rab21</i>                                 | RAB21, member RAS oncogene family                                                                                                                                                                                            | 1437742 at   | -1.82 | 0.00 |
| <i>Prox1</i>                                 | prospero-related homeobox 1                                                                                                                                                                                                  | 1457432 at   | -1.82 | 0.00 |
| <i>Nkiras1</i>                               | NFKB inhibitor interacting Ras-like protein 1                                                                                                                                                                                | 1428503 a at | -1.82 | 0.00 |
| <i>Frmd6</i>                                 | FERM domain containing 6                                                                                                                                                                                                     | 1451264 at   | -1.82 | 0.00 |
| <i>Ptprb</i>                                 | protein tyrosine phosphatase, receptor type, B                                                                                                                                                                               | 1427486 at   | -1.83 | 0.00 |
| <i>Hrsp12</i>                                | heat-responsive protein 12                                                                                                                                                                                                   | 1428326 s at | -1.83 | 0.00 |
| <i>BC017612</i>                              | cDNA sequence BC017612                                                                                                                                                                                                       | 1419403 at   | -1.83 | 0.00 |
| <i>9930021J17Rik</i>                         | RIKEN cDNA 9930021J17 gene                                                                                                                                                                                                   | 1437371 at   | -1.83 | 0.00 |
| <i>Kbtbd3</i>                                | kelch repeat and BTB (POZ) domain containing 3                                                                                                                                                                               | 1439062 at   | -1.83 | 0.00 |
| <i>1700113I22Rik</i>                         | RIKEN cDNA 1700113I22 gene                                                                                                                                                                                                   | 1454256 s at | -1.83 | 0.00 |
| <i>Rgs2</i>                                  | regulator of G-protein signaling 2                                                                                                                                                                                           | 1419247 at   | -1.83 | 0.00 |
| <i>AW547186</i>                              | expressed sequence AW547186                                                                                                                                                                                                  | 1454741 s at | -1.83 | 0.00 |
| <i>Il17d</i>                                 | interleukin 17D                                                                                                                                                                                                              | 1435714 x at | -1.83 | 0.00 |
| <i>Plekha6</i>                               | pleckstrin homology domain containing, family A member 6                                                                                                                                                                     | 1427149 at   | -1.83 | 0.00 |
| <i>Slc4a4</i>                                | solute carrier family 4 (anion exchanger), member 4                                                                                                                                                                          | 1426432 a at | -1.83 | 0.00 |
| <i>Gtl2</i>                                  | GTL2, imprinted maternally expressed untranslated mRNA                                                                                                                                                                       | 1436713 s at | -1.83 | 0.00 |
| <i>Entpd5</i>                                | ectonucleoside triphosphate diphosphohydrolase 5                                                                                                                                                                             | 1417384 at   | -1.83 | 0.00 |
| <i>E430002G05Rik</i>                         | RIKEN cDNA E430002G05 gene                                                                                                                                                                                                   | 1433529 at   | -1.83 | 0.00 |
| <i>Iff81</i>                                 | intraflagellar transport 81 homolog (Chlamydomonas)                                                                                                                                                                          | 1419286 s at | -1.83 | 0.00 |
| <i>6330403M23Rik</i>                         | RIKEN cDNA 6330403M23 gene                                                                                                                                                                                                   | 1455538 at   | -1.83 | 0.00 |
| <i>1110019J04Rik</i>                         | RIKEN cDNA 1110019J04 gene                                                                                                                                                                                                   | 1415733 a at | -1.83 | 0.00 |
| <i>Ar</i>                                    | androgen receptor                                                                                                                                                                                                            | 1437064 at   | -1.83 | 0.00 |
| <i>Ndn</i>                                   | necdin                                                                                                                                                                                                                       | 1415923 at   | -1.83 | 0.00 |
| <i>Ndn</i>                                   | necdin                                                                                                                                                                                                                       | 1455792 x at | -1.83 | 0.00 |
| <i>Clen3</i>                                 | chloride channel 3                                                                                                                                                                                                           | 1433486 at   | -1.83 | 0.00 |
| <i>5730472N09Rik</i>                         | RIKEN cDNA 5730472N09 gene                                                                                                                                                                                                   | 1449714 at   | -1.83 | 0.00 |
| <i>Ndn</i>                                   | necdin                                                                                                                                                                                                                       | 1435383 x at | -1.83 | 0.00 |
| <i>Vav3</i>                                  | vav 3 oncogene                                                                                                                                                                                                               | 1417122 at   | -1.83 | 0.00 |
| <i>Npy1r</i>                                 | neuropeptide Y receptor Y1                                                                                                                                                                                                   | 1421471 at   | -1.83 | 0.00 |
| <i>Ube2a</i>                                 | ubiquitin-conjugating enzyme E2A, RAD6 homolog (S. cerevisiae)                                                                                                                                                               | 1417609 at   | -1.84 | 0.00 |
| <i>Pea15</i>                                 | Phosphoprotein enriched in astrocytes 15                                                                                                                                                                                     | 1459733 at   | -1.84 | 0.00 |
| <i>Plagl1</i>                                | pleiomorphic adenoma gene-like 1                                                                                                                                                                                             | 1426208 x at | -1.84 | 0.00 |
| <i>Hccs</i>                                  | holocytochrome c synthetase                                                                                                                                                                                                  | 1420889 at   | -1.84 | 0.00 |
| <i>A930008G19Rik</i>                         | RIKEN cDNA A930008G19 gene                                                                                                                                                                                                   | 1431173 at   | -1.84 | 0.00 |
| <i>Arhgef6</i>                               | Rac/Cdc42 guanine nucleotide exchange factor (GEF) 6                                                                                                                                                                         | 1429012 at   | -1.84 | 0.00 |
| <i>D030029J20Rik</i>                         | RIKEN cDNA D030029J20 gene                                                                                                                                                                                                   | 1437885 at   | -1.84 | 0.00 |
| <i>Tspan6</i>                                | tetraspanin 6                                                                                                                                                                                                                | 1448501 at   | -1.84 | 0.00 |
| <i>1700021F05Rik</i>                         | RIKEN cDNA 1700021F05 gene                                                                                                                                                                                                   | 1421019 at   | -1.84 | 0.00 |
| <i>Pfkm</i>                                  | phosphofruktokinase, muscle                                                                                                                                                                                                  | 1416780 at   | -1.84 | 0.00 |
| <i>Vegfc</i>                                 | vascular endothelial growth factor C                                                                                                                                                                                         | 1419417 at   | -1.84 | 0.00 |
| <i>Sfrp2</i>                                 | secreted frizzled-related protein 2                                                                                                                                                                                          | 1448201 at   | -1.84 | 0.00 |
| <i>Fhod3</i>                                 | formin homology 2 domain containing 3                                                                                                                                                                                        | 1435551 at   | -1.84 | 0.00 |
| <i>Gga2</i>                                  | golgi associated, gamma adaptin ear containing, ARF binding protein 2                                                                                                                                                        | 1428141 at   | -1.84 | 0.00 |
| <i>Rgnef</i>                                 | Rho-guanine nucleotide exchange factor                                                                                                                                                                                       | 1419458 at   | -1.84 | 0.00 |
| <i>Nhlrc1</i>                                | NHL repeat containing 1                                                                                                                                                                                                      | 1435213 at   | -1.84 | 0.00 |
| <i>Lbh</i>                                   | limb-bud and heart                                                                                                                                                                                                           | 1429088 at   | -1.84 | 0.00 |
| <i>Thy1</i>                                  | thymus cell antigen 1, theta                                                                                                                                                                                                 | 1423135 at   | -1.84 | 0.00 |
| <i>6430514L14Rik</i>                         | RIKEN cDNA 6430514L14 gene                                                                                                                                                                                                   | 1425213 at   | -1.84 | 0.00 |
| <i>Ndn</i>                                   | necdin                                                                                                                                                                                                                       | 1435382 at   | -1.84 | 0.00 |
| <i>Aldh5a1</i>                               | aldehyde dehydrogenase family 5, subfamily A1                                                                                                                                                                                | 1453065 at   | -1.85 | 0.00 |
| <i>C030018P15Rik</i>                         | RIKEN cDNA C030018P15 gene                                                                                                                                                                                                   | 1419940 at   | -1.85 | 0.00 |
| <i>Cacna1c</i>                               | Calcium channel, voltage-dependent, L type, alpha 1C subunit                                                                                                                                                                 | 1441679 at   | -1.85 | 0.00 |
| <i>Dbh</i>                                   | dopamine beta hydroxylase                                                                                                                                                                                                    | 1459848 x at | -1.85 | 0.00 |
| <i>Ebf3</i>                                  | early B-cell factor 3                                                                                                                                                                                                        | 1452751 at   | -1.85 | 0.00 |
| <i>Ppapdc3</i>                               | phosphatidic acid phosphatase type 2 domain containing 3                                                                                                                                                                     | 1424362 at   | -1.85 | 0.00 |
| <i>Dach1</i>                                 | Dachshund 1 (Drosophila)                                                                                                                                                                                                     | 1447174 at   | -1.85 | 0.01 |
| <i>Elov15</i>                                | ELOVL family member 5, elongation of long chain fatty acids (yeast)                                                                                                                                                          | 1437211 x at | -1.85 | 0.00 |
| <i>Cacnb2</i>                                | calcium channel, voltage-dependent, beta 2 subunit                                                                                                                                                                           | 1452476 at   | -1.85 | 0.00 |
| <i>Klhl23</i>                                | kelch-like 23 (Drosophila)                                                                                                                                                                                                   | 1435743 at   | -1.85 | 0.00 |
| <i>Vil2</i>                                  | villin 2                                                                                                                                                                                                                     | 1450850 at   | -1.85 | 0.00 |
| <i>1110003E01Rik</i>                         | RIKEN cDNA 1110003E01 gene                                                                                                                                                                                                   | 1416767 a at | -1.85 | 0.00 |
| <i>Zfp715</i>                                | zinc finger protein 715                                                                                                                                                                                                      | 1434461 at   | -1.85 | 0.00 |

|                                                                                                                                                                                                        |                                                                                                                                                                                                                                                                                                                                                                                                                                                                                               |              |       |      |
|--------------------------------------------------------------------------------------------------------------------------------------------------------------------------------------------------------|-----------------------------------------------------------------------------------------------------------------------------------------------------------------------------------------------------------------------------------------------------------------------------------------------------------------------------------------------------------------------------------------------------------------------------------------------------------------------------------------------|--------------|-------|------|
| <i>Shox2</i>                                                                                                                                                                                           | short stature homeobox 2                                                                                                                                                                                                                                                                                                                                                                                                                                                                      | 1438042 at   | -1.85 | 0.00 |
| <i>Syne1</i>                                                                                                                                                                                           | synaptic nuclear envelope 1                                                                                                                                                                                                                                                                                                                                                                                                                                                                   | 1421545 a at | -1.85 | 0.00 |
| <i>Rora</i>                                                                                                                                                                                            | RAR-related orphan receptor alpha                                                                                                                                                                                                                                                                                                                                                                                                                                                             | 1457177 at   | -1.85 | 0.00 |
| <i>Zc3h8</i>                                                                                                                                                                                           | zinc finger CCCH type containing 8                                                                                                                                                                                                                                                                                                                                                                                                                                                            | 1418495 at   | -1.85 | 0.00 |
| <i>Cacna2d1</i>                                                                                                                                                                                        | Calcium channel, voltage-dependent, alpha2/delta subunit 1                                                                                                                                                                                                                                                                                                                                                                                                                                    | 1446324 at   | -1.85 | 0.00 |
| <i>Pp1fr</i>                                                                                                                                                                                           | placental protein 11 related                                                                                                                                                                                                                                                                                                                                                                                                                                                                  | 1449938 at   | -1.85 | 0.00 |
| <i>Tnfrsf8</i>                                                                                                                                                                                         | tumor necrosis factor, alpha-induced protein 8                                                                                                                                                                                                                                                                                                                                                                                                                                                | 1416950 at   | -1.85 | 0.00 |
| <i>AA407270</i>                                                                                                                                                                                        | expressed sequence AA407270                                                                                                                                                                                                                                                                                                                                                                                                                                                                   | 1455180 at   | -1.86 | 0.00 |
| <i>1110003F05Rik</i>                                                                                                                                                                                   | RIKEN cDNA 1110003F05 gene                                                                                                                                                                                                                                                                                                                                                                                                                                                                    | 1441964 at   | -1.86 | 0.00 |
| <i>Myo10</i>                                                                                                                                                                                           | Myosin X                                                                                                                                                                                                                                                                                                                                                                                                                                                                                      | 1427363 at   | -1.86 | 0.00 |
| <i>Pitpnc1</i>                                                                                                                                                                                         | phosphatidylinositol transfer protein, cytoplasmic 1                                                                                                                                                                                                                                                                                                                                                                                                                                          | 1428878 a at | -1.86 | 0.00 |
| <i>Dkk3</i>                                                                                                                                                                                            | dickkopf homolog 3 (Xenopus laevis)                                                                                                                                                                                                                                                                                                                                                                                                                                                           | 1417312 at   | -1.86 | 0.00 |
| <i>Stard10</i>                                                                                                                                                                                         | START domain containing 10                                                                                                                                                                                                                                                                                                                                                                                                                                                                    | 1448956 at   | -1.86 | 0.00 |
| <i>Lims1</i>                                                                                                                                                                                           | LIM and senescent cell antigen-like domains 1                                                                                                                                                                                                                                                                                                                                                                                                                                                 | 1418232 s at | -1.86 | 0.00 |
| <i>Camk1d</i>                                                                                                                                                                                          | Calcium/calmodulin-dependent protein kinase ID                                                                                                                                                                                                                                                                                                                                                                                                                                                | 1438643 at   | -1.86 | 0.00 |
| <i>Narf</i>                                                                                                                                                                                            | nuclear prelamin A recognition factor                                                                                                                                                                                                                                                                                                                                                                                                                                                         | 1451678 at   | -1.86 | 0.00 |
| <i>Tnxb</i>                                                                                                                                                                                            | tenascin XB                                                                                                                                                                                                                                                                                                                                                                                                                                                                                   | 1450798 at   | -1.86 | 0.01 |
| <i>5730409N24Rik</i>                                                                                                                                                                                   | RIKEN cDNA 5730409N24 gene                                                                                                                                                                                                                                                                                                                                                                                                                                                                    | 1430362 at   | -1.87 | 0.01 |
| <i>Samd12</i>                                                                                                                                                                                          | sterile alpha motif domain containing 12                                                                                                                                                                                                                                                                                                                                                                                                                                                      | 1458114 at   | -1.87 | 0.00 |
| <i>Kcnd3</i>                                                                                                                                                                                           | potassium voltage-gated channel, Shal-related family, member 3                                                                                                                                                                                                                                                                                                                                                                                                                                | 1435720 at   | -1.87 | 0.00 |
| <i>Dact1</i>                                                                                                                                                                                           | dapper homolog 1, antagonist of beta-catenin (Xenopus)                                                                                                                                                                                                                                                                                                                                                                                                                                        | 1417937 at   | -1.87 | 0.00 |
| <i>AA536749</i>                                                                                                                                                                                        | expressed sequence AA536749                                                                                                                                                                                                                                                                                                                                                                                                                                                                   | 1456763 at   | -1.87 | 0.00 |
| <i>Atp1b2</i>                                                                                                                                                                                          | ATPase, Na <sup>+</sup> /K <sup>+</sup> transporting, beta 2 polypeptide                                                                                                                                                                                                                                                                                                                                                                                                                      | 1435148 at   | -1.87 | 0.00 |
| <i>Metm</i>                                                                                                                                                                                            | meteorin, glial cell differentiation regulator                                                                                                                                                                                                                                                                                                                                                                                                                                                | 1427100 at   | -1.87 | 0.00 |
| <i>Elov15</i>                                                                                                                                                                                          | ELOVL family member 5, elongation of long chain fatty acids (yeast)                                                                                                                                                                                                                                                                                                                                                                                                                           | 1415840 at   | -1.87 | 0.00 |
| <i>Ltbp1</i>                                                                                                                                                                                           | latent transforming growth factor beta binding protein 1                                                                                                                                                                                                                                                                                                                                                                                                                                      | 1448870 at   | -1.87 | 0.00 |
| <i>Mllt4</i>                                                                                                                                                                                           | myeloid/lymphoid or mixed lineage-leukemia translocation to 4 homolog (Drosophila)                                                                                                                                                                                                                                                                                                                                                                                                            | 1436303 at   | -1.87 | 0.00 |
| <i>Supv31l</i>                                                                                                                                                                                         | suppressor of var1, 3-like 1 (S. cerevisiae)                                                                                                                                                                                                                                                                                                                                                                                                                                                  | 1460557 at   | -1.87 | 0.00 |
| <i>Hevl</i>                                                                                                                                                                                            | hairy/enhancer-of-split related with YRPW motif-like                                                                                                                                                                                                                                                                                                                                                                                                                                          | 1419303 at   | -1.87 | 0.00 |
| <i>Zbtb20</i>                                                                                                                                                                                          | zinc finger and BTB domain containing 20                                                                                                                                                                                                                                                                                                                                                                                                                                                      | 1451577 at   | -1.87 | 0.00 |
| <i>Macf1</i>                                                                                                                                                                                           | microtubule-actin crosslinking factor 1                                                                                                                                                                                                                                                                                                                                                                                                                                                       | 1428847 a at | -1.87 | 0.00 |
| <i>Rwdd4a</i>                                                                                                                                                                                          | RWD domain containing 4A                                                                                                                                                                                                                                                                                                                                                                                                                                                                      | 1424244 at   | -1.87 | 0.00 |
| <i>Ivms1abp</i>                                                                                                                                                                                        | influenza virus NS1A binding protein                                                                                                                                                                                                                                                                                                                                                                                                                                                          | 1420961 a at | -1.87 | 0.00 |
| <i>Dnaja1</i>                                                                                                                                                                                          | DnaJ (Hsp40) homolog, subfamily A, member 1                                                                                                                                                                                                                                                                                                                                                                                                                                                   | 1445729 at   | -1.87 | 0.00 |
| <i>Kcnj5</i>                                                                                                                                                                                           | potassium inwardly-rectifying channel, subfamily J, member 5                                                                                                                                                                                                                                                                                                                                                                                                                                  | 1441590 at   | -1.87 | 0.00 |
| <i>Dspg3</i>                                                                                                                                                                                           | dermatan sulphate proteoglycan 3                                                                                                                                                                                                                                                                                                                                                                                                                                                              | 1421114 a at | -1.87 | 0.00 |
| <i>6330509G02Rik</i>                                                                                                                                                                                   | RIKEN cDNA 6330509G02 gene                                                                                                                                                                                                                                                                                                                                                                                                                                                                    | 1457354 at   | -1.87 | 0.00 |
| <i>Zadh1</i>                                                                                                                                                                                           | zinc binding alcohol dehydrogenase, domain containing 1                                                                                                                                                                                                                                                                                                                                                                                                                                       | 1429474 at   | -1.87 | 0.00 |
| <i>Atp8a1</i>                                                                                                                                                                                          | ATPase, aminophospholipid transporter (APLT), class I, type 8A, member 1                                                                                                                                                                                                                                                                                                                                                                                                                      | 1423597 at   | -1.87 | 0.01 |
| <i>Maf</i>                                                                                                                                                                                             | avian musculoaponeurotic fibrosarcoma (v-maf) AS42 oncogene homolog                                                                                                                                                                                                                                                                                                                                                                                                                           | 1447849 s at | -1.87 | 0.00 |
| <i>Sr1 // LOC669709</i>                                                                                                                                                                                | sarcalumenin // similar to sarcalumenin                                                                                                                                                                                                                                                                                                                                                                                                                                                       | 1436867 at   | -1.87 | 0.00 |
| <i>Pank4</i>                                                                                                                                                                                           | pantothenate kinase 4                                                                                                                                                                                                                                                                                                                                                                                                                                                                         | 1435004 at   | -1.87 | 0.00 |
| <i>Bicc1</i>                                                                                                                                                                                           | bicaudal C homolog 1 (Drosophila)                                                                                                                                                                                                                                                                                                                                                                                                                                                             | 1441137 at   | -1.87 | 0.00 |
| <i>Egln1</i>                                                                                                                                                                                           | EGL nine homolog 1 (C. elegans)                                                                                                                                                                                                                                                                                                                                                                                                                                                               | 1451110 at   | -1.87 | 0.00 |
| <i>Alad</i>                                                                                                                                                                                            | aminolevulinate, delta-, dehydratase                                                                                                                                                                                                                                                                                                                                                                                                                                                          | 1424877 a at | -1.88 | 0.00 |
| <i>Slca2b1</i>                                                                                                                                                                                         | solute carrier organic anion transporter family, member 2b1                                                                                                                                                                                                                                                                                                                                                                                                                                   | 1433933 s at | -1.88 | 0.01 |
| <i>4933403F05Rik</i>                                                                                                                                                                                   | RIKEN cDNA 4933403F05 gene                                                                                                                                                                                                                                                                                                                                                                                                                                                                    | 1434978 at   | -1.88 | 0.00 |
| <i>Susd5</i>                                                                                                                                                                                           | sushi domain containing 5                                                                                                                                                                                                                                                                                                                                                                                                                                                                     | 1438636 s at | -1.88 | 0.00 |
| <i>Clasp1</i>                                                                                                                                                                                          | CLIP associating protein 1                                                                                                                                                                                                                                                                                                                                                                                                                                                                    | 1452265 at   | -1.88 | 0.00 |
| <i>Bri3</i>                                                                                                                                                                                            | brain protein I3                                                                                                                                                                                                                                                                                                                                                                                                                                                                              | 1416924 at   | -1.88 | 0.00 |
| <i>Entpd5</i>                                                                                                                                                                                          | ectonucleoside triphosphate diphosphohydrolase 5                                                                                                                                                                                                                                                                                                                                                                                                                                              | 1417382 at   | -1.88 | 0.00 |
| <i>LOC270335 // LOC434328 // LOC544983 // LOC545175 // LOC619711 // LOC622782 // LOC623857 // LOC624831 // LOC665837 // LOC666017 // LOC666200 // LOC666464 // LOC668524 // LOC670117 // LOC670242</i> | hypothetical gene supported by BC019681; BC027236 // hypothetical LOC434328 // hypothetical LOC544983 // hypothetical LOC545175 // hypothetical LOC619711 // hypothetical LOC622782 // hypothetical protein LOC623857 // hypothetical LOC624831 // hypothetical protein LOC665837 // hypothetical protein LOC666017 // hypothetical protein LOC666200 // hypothetical protein LOC666464 // hypothetical protein LOC668524 // hypothetical protein LOC670117 // hypothetical protein LOC670242 | 1423071_x at | -1.88 | 0.00 |
| <i>Col6a2</i>                                                                                                                                                                                          | procollagen, type VI, alpha 2                                                                                                                                                                                                                                                                                                                                                                                                                                                                 | 1452250 a at | -1.88 | 0.01 |
| <i>Atp2a3</i>                                                                                                                                                                                          | ATPase, Ca <sup>++</sup> transporting, ubiquitous                                                                                                                                                                                                                                                                                                                                                                                                                                             | 1421129 a at | -1.88 | 0.00 |
| <i>9530096D07Rik</i>                                                                                                                                                                                   | RIKEN cDNA 9530096D07 gene                                                                                                                                                                                                                                                                                                                                                                                                                                                                    | 1444450 at   | -1.88 | 0.00 |
| <i>Pde4b</i>                                                                                                                                                                                           | Phosphodiesterase 4B, cAMP specific                                                                                                                                                                                                                                                                                                                                                                                                                                                           | 1447237 at   | -1.88 | 0.00 |
| <i>5730406M06Rik</i>                                                                                                                                                                                   | RIKEN cDNA 5730406M06 gene                                                                                                                                                                                                                                                                                                                                                                                                                                                                    | 1437041 at   | -1.88 | 0.00 |
| <i>Thrb</i>                                                                                                                                                                                            | Thyroid hormone receptor beta                                                                                                                                                                                                                                                                                                                                                                                                                                                                 | 1443100 at   | -1.88 | 0.00 |
| <i>Atxn2</i>                                                                                                                                                                                           | ataxin 2                                                                                                                                                                                                                                                                                                                                                                                                                                                                                      | 1419866 s at | -1.88 | 0.00 |
| <i>Ors1l</i>                                                                                                                                                                                           | glutamyl-tRNA synthase (glutamine-hydrolyzing)-like 1                                                                                                                                                                                                                                                                                                                                                                                                                                         | 1456542 s at | -1.88 | 0.00 |
| <i>2010001E11Rik // A1317395</i>                                                                                                                                                                       | RIKEN cDNA 2010001E11 gene // expressed sequence A1317395                                                                                                                                                                                                                                                                                                                                                                                                                                     | 1451760 s at | -1.88 | 0.00 |
| <i>AW495713</i>                                                                                                                                                                                        | expressed sequence AW495713                                                                                                                                                                                                                                                                                                                                                                                                                                                                   | 1441522 at   | -1.88 | 0.00 |
| <i>Sesn1</i>                                                                                                                                                                                           | Sestrin 1                                                                                                                                                                                                                                                                                                                                                                                                                                                                                     | 1441649 at   | -1.89 | 0.00 |
| <i>Sirt5</i>                                                                                                                                                                                           | sirtuin 5 (silent mating type information regulation 2 homolog) 5 (S. cerevisiae)                                                                                                                                                                                                                                                                                                                                                                                                             | 1428915 at   | -1.89 | 0.00 |
| <i>Usp15</i>                                                                                                                                                                                           | ubiquitin specific peptidase 15                                                                                                                                                                                                                                                                                                                                                                                                                                                               | 1436891 at   | -1.89 | 0.00 |
| <i>Dapk2</i>                                                                                                                                                                                           | death-associated kinase 2                                                                                                                                                                                                                                                                                                                                                                                                                                                                     | 1451453 at   | -1.89 | 0.00 |
| <i>Pcolce2</i>                                                                                                                                                                                         | procollagen C-endopeptidase enhancer 2                                                                                                                                                                                                                                                                                                                                                                                                                                                        | 1451527 at   | -1.89 | 0.01 |
| <i>Pck1</i>                                                                                                                                                                                            | phosphoenolpyruvate carboxykinase 1, cytosolic                                                                                                                                                                                                                                                                                                                                                                                                                                                | 1423439 at   | -1.89 | 0.00 |
| <i>Tmem64</i>                                                                                                                                                                                          | transmembrane protein 64                                                                                                                                                                                                                                                                                                                                                                                                                                                                      | 1434307 at   | -1.89 | 0.00 |
| <i>D230012E17Rik</i>                                                                                                                                                                                   | RIKEN cDNA D230012E17 gene                                                                                                                                                                                                                                                                                                                                                                                                                                                                    | 1436317 at   | -1.89 | 0.00 |
| <i>Elk3</i>                                                                                                                                                                                            | ELK3, member of ETS oncogene family                                                                                                                                                                                                                                                                                                                                                                                                                                                           | 1417662 at   | -1.89 | 0.01 |
| <i>Ces3</i>                                                                                                                                                                                            | carboxylesterase 3                                                                                                                                                                                                                                                                                                                                                                                                                                                                            | 1435371 x at | -1.89 | 0.00 |
| <i>Trpc3</i>                                                                                                                                                                                           | transient receptor potential cation channel, subfamily C, member 3                                                                                                                                                                                                                                                                                                                                                                                                                            | 1417577 at   | -1.89 | 0.00 |
| <i>Msi2</i>                                                                                                                                                                                            | Musashi homolog 2 (Drosophila)                                                                                                                                                                                                                                                                                                                                                                                                                                                                | 1435521 at   | -1.89 | 0.00 |
| <i>Akap6</i>                                                                                                                                                                                           | A kinase (PRKA) anchor protein 6                                                                                                                                                                                                                                                                                                                                                                                                                                                              | 1440859 at   | -1.89 | 0.00 |
| <i>Scd2</i>                                                                                                                                                                                            | stearoyl-Coenzyme A desaturase 2                                                                                                                                                                                                                                                                                                                                                                                                                                                              | 1415822 at   | -1.89 | 0.00 |
| <i>BC037032</i>                                                                                                                                                                                        | cDNA Sequence BC037032                                                                                                                                                                                                                                                                                                                                                                                                                                                                        | 1444682 at   | -1.89 | 0.00 |
| <i>Rom1</i>                                                                                                                                                                                            | rod outer segment membrane protein 1                                                                                                                                                                                                                                                                                                                                                                                                                                                          | 1448996 at   | -1.89 | 0.00 |
| <i>Tns3</i>                                                                                                                                                                                            | tensin 3                                                                                                                                                                                                                                                                                                                                                                                                                                                                                      | 1455333 at   | -1.89 | 0.00 |
| <i>Anp32a</i>                                                                                                                                                                                          | acidic (leucine-rich) nuclear phosphoprotein 32 family, member A                                                                                                                                                                                                                                                                                                                                                                                                                              | 1421918 at   | -1.89 | 0.00 |
| <i>Ppp1r14c</i>                                                                                                                                                                                        | Protein phosphatase 1, regulatory (inhibitor) subunit 14c                                                                                                                                                                                                                                                                                                                                                                                                                                     | 1443799 at   | -1.90 | 0.00 |
| <i>Gmn</i>                                                                                                                                                                                             | geminin                                                                                                                                                                                                                                                                                                                                                                                                                                                                                       | 1417506 at   | -1.90 | 0.00 |
| <i>BC004004</i>                                                                                                                                                                                        | cDNA sequence BC004004                                                                                                                                                                                                                                                                                                                                                                                                                                                                        | 1434276 x at | -1.90 | 0.00 |
| <i>B230380D07Rik</i>                                                                                                                                                                                   | RIKEN cDNA B230380D07 gene                                                                                                                                                                                                                                                                                                                                                                                                                                                                    | 1436842 at   | -1.90 | 0.00 |
| <i>A930004K21Rik</i>                                                                                                                                                                                   | RIKEN cDNA A930004K21 gene                                                                                                                                                                                                                                                                                                                                                                                                                                                                    | 1435956 at   | -1.90 | 0.00 |
| <i>2810013C04Rik</i>                                                                                                                                                                                   | RIKEN cDNA 2810013C04 gene                                                                                                                                                                                                                                                                                                                                                                                                                                                                    | 1452991 at   | -1.90 | 0.00 |
| <i>Sfrp1</i>                                                                                                                                                                                           | secreted frizzled-related sequence protein 1                                                                                                                                                                                                                                                                                                                                                                                                                                                  | 1460187 at   | -1.90 | 0.00 |
| <i>Svep1</i>                                                                                                                                                                                           | sushi, von Willebrand factor type A, EGF and pentraxin domain containing 1                                                                                                                                                                                                                                                                                                                                                                                                                    | 1419182 at   | -1.90 | 0.00 |
| <i>Tpm1</i>                                                                                                                                                                                            | tropomyosin 1, alpha                                                                                                                                                                                                                                                                                                                                                                                                                                                                          | 1423721 at   | -1.90 | 0.00 |
| <i>Olfml1</i>                                                                                                                                                                                          | olfactomedin-like 1                                                                                                                                                                                                                                                                                                                                                                                                                                                                           | 1455663 at   | -1.90 | 0.00 |

|                      |                                                                                                   |              |       |      |
|----------------------|---------------------------------------------------------------------------------------------------|--------------|-------|------|
| <i>Ankrd24</i>       | ankyrin repeat domain 24                                                                          | 1430776 s at | -1.90 | 0.00 |
| <i>AW495713</i>      | expressed sequence AW495713                                                                       | 1437077 at   | -1.90 | 0.00 |
| <i>2810406C15Rik</i> | RIKEN cDNA 2810406C15 gene                                                                        | 1423847 at   | -1.91 | 0.00 |
| <i>2810055F11Rik</i> | RIKEN cDNA 2810055F11 gene                                                                        | 1424692 at   | -1.91 | 0.00 |
| <i>Setd8</i>         | SET domain containing (lysine methyltransferase) 8                                                | 1460687 at   | -1.91 | 0.00 |
| ---                  | ---                                                                                               | 1439305 at   | -1.91 | 0.00 |
| <i>8430408J09Rik</i> | RIKEN cDNA 8430408J09 gene                                                                        | 1430196 at   | -1.91 | 0.00 |
| <i>9630033F20Rik</i> | RIKEN cDNA 9630033F20 gene                                                                        | 1439859 at   | -1.91 | 0.00 |
| <i>5730472N09Rik</i> | RIKEN cDNA 5730472N09 gene                                                                        | 1433493 at   | -1.91 | 0.00 |
| <i>Sema6a</i>        | sema domain, transmembrane domain (TM), and cytoplasmic domain, (semaphorin) 6A                   | 1436458 at   | -1.91 | 0.00 |
| <i>BC004004</i>      | cDNA sequence BC004004                                                                            | 1416609 at   | -1.91 | 0.00 |
| <i>Rxrg</i>          | retinoid X receptor gamma                                                                         | 1418782 at   | -1.91 | 0.00 |
| <i>Ccnd2</i>         | cyclin D2                                                                                         | 1455956 x at | -1.91 | 0.00 |
| <i>Nr2f1</i>         | nuclear receptor subfamily 2, group F, member 1                                                   | 1418157 at   | -1.91 | 0.00 |
| <i>Klf12</i>         | Kruppel-like factor 12                                                                            | 1455521 at   | -1.91 | 0.00 |
| <i>Trp53inp2</i>     | tumor protein p53 inducible nuclear protein 2                                                     | 1452646 at   | -1.91 | 0.00 |
| <i>Med12l</i>        | mediator of RNA polymerase II transcription, subunit 12 homolog (yeast)-like                      | 1452864 at   | -1.91 | 0.00 |
| <i>Mtap4</i>         | Microtubule-associated protein 4                                                                  | 1439467 at   | -1.91 | 0.00 |
| <i>Plp1</i>          | proteolipid protein (myelin) 1                                                                    | 1451718 at   | -1.91 | 0.00 |
| <i>4833416E15Rik</i> | RIKEN cDNA 4833416E15 gene                                                                        | 1440339 at   | -1.91 | 0.00 |
| <i>Cacna2d1</i>      | Calcium channel, voltage-dependent, alpha2/delta subunit 1                                        | 1441608 at   | -1.91 | 0.00 |
| <i>Speg</i>          | SPEG complex locus                                                                                | 1425968 s at | -1.92 | 0.00 |
| <i>Pfkfb1</i>        | 6-phosphofructo-2-kinase/fructose-2,6-biphosphatase 1                                             | 1427213 at   | -1.92 | 0.00 |
| <i>Gpsm1</i>         | G-protein signalling modulator 1 (AGS3-like, C. elegans)                                          | 1423690 s at | -1.92 | 0.00 |
| <i>Ahrh</i>          | aryl-hydrocarbon receptor repressor                                                               | 1420796 at   | -1.92 | 0.00 |
| <i>Iplr1</i>         | inositol 1,4,5-triphosphate receptor 1                                                            | 1417279 at   | -1.92 | 0.00 |
| <i>Mapt</i>          | microtubule-associated protein tau                                                                | 1455028 at   | -1.92 | 0.00 |
| <i>Mtap1b</i>        | microtubule-associated protein 1 B                                                                | 1450397 at   | -1.92 | 0.00 |
| <i>Igsf4c</i>        | immunoglobulin superfamily, member 4C                                                             | 1426263 at   | -1.92 | 0.00 |
| <i>Atxn2</i>         | ataxin 2                                                                                          | 1438143 s at | -1.92 | 0.00 |
| <i>E030049G20Rik</i> | RIKEN cDNA E030049G20 gene                                                                        | 1444086 at   | -1.92 | 0.00 |
| <i>Runx1t1</i>       | runt-related transcription factor 1; translocated to, 1 (cyclin D-related)                        | 1448785 at   | -1.92 | 0.00 |
| <i>1110018F16Rik</i> | RIKEN cDNA 1110018F16 gene                                                                        | 1429468 at   | -1.92 | 0.00 |
| <i>Id4</i>           | inhibitor of DNA binding 4                                                                        | 1423259 at   | -1.92 | 0.00 |
| <i>D7Erd715e</i>     | DNA segment, Chr 7, ERATO Doi 715, expressed                                                      | 1436964 at   | -1.92 | 0.00 |
| <i>9530009M10Rik</i> | RIKEN cDNA 9530009M10 gene                                                                        | 1445850 at   | -1.92 | 0.00 |
| <i>Spata13</i>       | Spermatogenesis associated 13                                                                     | 1438543 at   | -1.92 | 0.00 |
| <i>Smarca3</i>       | SWI/SNF related, matrix associated, actin dependent regulator of chromatin, subfamily d, member 3 | 1418467_at   | -1.93 | 0.00 |
| <i>Ppat</i>          | phosphoribosyl pyrophosphate amidotransferase                                                     | 1452831 s at | -1.93 | 0.00 |
| <i>Id4</i>           | inhibitor of DNA binding 4                                                                        | 1450928 at   | -1.93 | 0.00 |
| <i>Paqr4</i>         | progesterin and adipoQ receptor family member IV                                                  | 1423101 at   | -1.93 | 0.00 |
| <i>Cdh11</i>         | cadherin 11                                                                                       | 1450757 at   | -1.93 | 0.00 |
| <i>E430016P22Rik</i> | RIKEN cDNA E430016P22 gene                                                                        | 1456756 at   | -1.93 | 0.00 |
| <i>Gas2l3</i>        | growth arrest-specific 2 like 3                                                                   | 1437244 at   | -1.93 | 0.00 |
| <i>Ptiplad2</i>      | protein tyrosine phosphatase-like A domain containing 2                                           | 1450967 at   | -1.93 | 0.00 |
| <i>Pitpnc1</i>       | phosphatidylinositol transfer protein, cytoplasmic 1                                              | 1452940 x at | -1.93 | 0.00 |
| <i>Dsc2</i>          | desmocollin 2                                                                                     | 1426911 at   | -1.93 | 0.00 |
| <i>Plxdc2</i>        | plexin domain containing 2                                                                        | 1418912 at   | -1.93 | 0.00 |
| ---                  | ---                                                                                               | 1441193 at   | -1.93 | 0.00 |
| <i>Ejcab2</i>        | EF-hand calcium binding domain 2                                                                  | 1449884 at   | -1.93 | 0.00 |
| <i>2810432L12Rik</i> | RIKEN cDNA 2810432L12 gene                                                                        | 1423679 at   | -1.93 | 0.00 |
| <i>Pde7a</i>         | phosphodiesterase 7A                                                                              | 1423314 s at | -1.93 | 0.00 |
| <i>Ebf1</i>          | early B-cell factor 1                                                                             | 1416302 at   | -1.93 | 0.00 |
| <i>1700110N18Rik</i> | RIKEN cDNA 1700110N18 gene                                                                        | 1455299 at   | -1.94 | 0.00 |
| <i>Prkcm</i>         | protein kinase C, mu                                                                              | 1422673 at   | -1.94 | 0.00 |
| <i>Sfrs7</i>         | splicing factor, arginine/serine-rich 7                                                           | 1424033 at   | -1.94 | 0.00 |
| <i>Phf17</i>         | PHD finger protein 17                                                                             | 1452180 at   | -1.94 | 0.00 |
| <i>Mgll</i>          | monoglyceride lipase                                                                              | 1450391 a at | -1.94 | 0.00 |
| <i>5033430I15Rik</i> | RIKEN cDNA 5033430I15 gene                                                                        | 1432509 at   | -1.94 | 0.00 |
| <i>Higd1b</i>        | HIG1 domain family, member 1B                                                                     | 1449860 at   | -1.94 | 0.00 |
| <i>Olfml2b</i>       | olfactomedin-like 2B                                                                              | 1423915 at   | -1.94 | 0.00 |
| <i>2210015D19Rik</i> | RIKEN cDNA 2210015D19 gene                                                                        | 1438285 at   | -1.94 | 0.00 |
| <i>BC028528</i>      | cDNA sequence BC028528                                                                            | 1427996 at   | -1.94 | 0.00 |
| <i>Txndc14</i>       | thioredoxin domain containing 14                                                                  | 1452130 at   | -1.94 | 0.00 |
| <i>Mef2c</i>         | myocyte enhancer factor 2C                                                                        | 1451506 at   | -1.94 | 0.00 |
| <i>Ptprm</i>         | protein tyrosine phosphatase, receptor type, M                                                    | 1422541 at   | -1.94 | 0.00 |
| <i>D13Erd787e</i>    | DNA segment, Chr 13, ERATO Doi 787, expressed                                                     | 1457304 at   | -1.94 | 0.00 |
| <i>Tef</i>           | thyrotroph embryonic factor                                                                       | 1438033 at   | -1.94 | 0.00 |
| <i>B230218O03</i>    | hypothetical protein B230218O03                                                                   | 1439777 at   | -1.94 | 0.00 |
| <i>Ccnd2</i>         | cyclin D2                                                                                         | 1448229 s at | -1.94 | 0.00 |
| <i>Palld</i>         | palladin, cytoskeletal associated protein                                                         | 1440635 at   | -1.94 | 0.00 |
| <i>Ppm2c</i>         | protein phosphatase 2C, magnesium dependent, catalytic subunit                                    | 1438201 at   | -1.94 | 0.00 |
| <i>Slc25a36</i>      | solute carrier family 25, member 36                                                               | 1438520 at   | -1.94 | 0.00 |
| <i>Ebf1</i>          | Early B-cell factor 1                                                                             | 1446669 at   | -1.95 | 0.00 |
| <i>Rbmx</i>          | RNA binding motif protein, X chromosome                                                           | 1416355 at   | -1.95 | 0.00 |
| <i>Mitf</i>          | microphthalmia-associated transcription factor                                                    | 1455214 at   | -1.95 | 0.00 |
| <i>Snca</i>          | synuclein, alpha                                                                                  | 1436853 a at | -1.95 | 0.01 |
| ---                  | PREDICTED: Mus musculus similar to 60S ribosomal protein L12 (LOC382344), mRNA                    | 1445539_at   | -1.95 | 0.00 |
| <i>Timp2</i>         | tissue inhibitor of metalloproteinase 2                                                           | 1454677 at   | -1.95 | 0.00 |
| <i>Ccdc80</i>        | coiled-coil domain containing 80                                                                  | 1424187 at   | -1.95 | 0.00 |
| <i>Ptcd2</i>         | Pentatricopeptide repeat domain 2                                                                 | 1458108 at   | -1.95 | 0.00 |
| <i>B3galnt2</i>      | UDP-GalNAc:betaGlcNAc beta 1,3-galactosaminyltransferase, polypeptide 2                           | 1434135 at   | -1.95 | 0.00 |
| <i>1810013L24Rik</i> | RIKEN cDNA 1810013L24 gene                                                                        | 1436478 at   | -1.95 | 0.00 |
| <i>Kcnj3</i>         | potassium inwardly-rectifying channel, subfamily J, member 3                                      | 1421468 at   | -1.95 | 0.00 |
| <i>Ebf3</i>          | early B-cell factor 3                                                                             | 1428349 s at | -1.95 | 0.00 |
| <i>Gdpd1</i>         | glycerophosphodiester phosphodiesterase domain containing 1                                       | 1424077 at   | -1.95 | 0.00 |
| <i>Dmpk</i>          | dystrophin myotonia-protein kinase                                                                | 1434944 at   | -1.95 | 0.00 |
| <i>A1464131</i>      | expressed sequence A1464131                                                                       | 1435417 at   | -1.95 | 0.00 |
| <i>Ccnd2</i>         | cyclin D2                                                                                         | 1430127 a at | -1.95 | 0.00 |
| <i>Prgfr</i>         | prostaglandin F receptor                                                                          | 1449828 at   | -1.95 | 0.00 |
| <i>Plxnd1</i>        | Plexin D1                                                                                         | 1451475 at   | -1.95 | 0.00 |
| <i>A1256396</i>      | EST A1256396                                                                                      | 1457042 at   | -1.96 | 0.00 |
| <i>Gsn</i>           | gelsolin                                                                                          | 1415812 at   | -1.96 | 0.00 |
| <i>D13Bwg1146e</i>   | DNA segment, Chr 13, Brigham & Women's Genetics 1146 expressed                                    | 1437559 at   | -1.96 | 0.00 |
| <i>Osbpl1a</i>       | oxysterol binding protein-like 1A                                                                 | 1416823 a at | -1.96 | 0.00 |

|                              |                                                                                                                                         |              |       |      |
|------------------------------|-----------------------------------------------------------------------------------------------------------------------------------------|--------------|-------|------|
| <i>2900084M01Rik</i>         | RIKEN cDNA 2900084M01 gene                                                                                                              | 1424790 at   | -1.96 | 0.00 |
| <i>Slc4a4</i>                | solute carrier family 4 (anion exchanger), member 4                                                                                     | 1452071 at   | -1.96 | 0.00 |
| <i>Tmem47</i>                | Transmembrane protein 47                                                                                                                | 1420514 at   | -1.96 | 0.00 |
| <i>Mef2c</i>                 | myocyte enhancer factor 2C                                                                                                              | 1421028 a at | -1.96 | 0.00 |
| <i>Fmod</i>                  | fibromodulin                                                                                                                            | 1415939 at   | -1.96 | 0.00 |
| <i>Jam2</i>                  | junction adhesion molecule 2                                                                                                            | 1419288 at   | -1.96 | 0.00 |
| <i>Per3</i>                  | period homolog 3 (Drosophila)                                                                                                           | 1460662 at   | -1.96 | 0.01 |
| <i>Nrarp</i>                 | Notch-regulated ankyrin repeat protein                                                                                                  | 1417985 at   | -1.96 | 0.00 |
| <i>Rora</i>                  | RAR-related orphan receptor alpha                                                                                                       | 1443511 at   | -1.96 | 0.00 |
| <i>Asb14</i>                 | ankyrin repeat and SOCS box-containing protein 14                                                                                       | 1449547 at   | -1.96 | 0.00 |
| <i>Mef2c</i>                 | Myocyte enhancer factor 2C                                                                                                              | 1458551 at   | -1.96 | 0.00 |
| <i>Mmachc</i>                | methylmalonic aciduria cblC type, with homocystinuria                                                                                   | 1418915 at   | -1.96 | 0.00 |
| <i>Itih5</i>                 | inter-alpha (globulin) inhibitor H5                                                                                                     | 1436755 at   | -1.96 | 0.00 |
| <i>H2-Aa /// H2-Ea</i>       | histocompatibility 2, class II antigen A, alpha /// histocompatibility 2, class II antigen E alpha                                      | 1452431_s at | -1.96 | 0.00 |
| <i>Nr3c1</i>                 | nuclear receptor subfamily 3, group C, member 1                                                                                         | 1421867 at   | -1.97 | 0.00 |
| <i>Thbs2</i>                 | thrombospondin 2                                                                                                                        | 1447862 x at | -1.97 | 0.00 |
| <i>Slc8a1</i>                | solute carrier family 8 (sodium/calcium exchanger), member 1                                                                            | 1437675 at   | -1.97 | 0.00 |
| <i>Tmod1</i>                 | tropomodulin 1                                                                                                                          | 1422754 at   | -1.97 | 0.00 |
| <i>Tn</i>                    | Titin                                                                                                                                   | 1446450 at   | -1.97 | 0.00 |
| <i>AB182283</i>              | cDNA sequence AB182283                                                                                                                  | 1455509 at   | -1.97 | 0.00 |
| <i>C78692</i>                | expressed sequence C78692                                                                                                               | 1446288 at   | -1.97 | 0.00 |
| <i>Apccd1</i>                | adenomatosis polyposis coli down-regulated 1                                                                                            | 1449070 x at | -1.97 | 0.00 |
| <i>Yipf4</i>                 | Yip1 domain family, member 4                                                                                                            | 1426417 at   | -1.97 | 0.00 |
| <i>Dmn</i>                   | desmuslin                                                                                                                               | 1455610 at   | -1.97 | 0.00 |
| <i>Tmem38a</i>               | transmembrane protein 38a                                                                                                               | 1424177 at   | -1.97 | 0.00 |
| <i>Zfp422-rs1</i>            | zinc finger protein 422, related sequence 1                                                                                             | 1434896 at   | -1.97 | 0.00 |
| <i>Nrp1</i>                  | neuropilin 1                                                                                                                            | 1448943 at   | -1.97 | 0.00 |
| <i>Ptgr</i>                  | prostaglandin F receptor                                                                                                                | 1446331 at   | -1.97 | 0.00 |
| <i>Gpc1</i>                  | glypican 1                                                                                                                              | 1417389 at   | -1.97 | 0.00 |
| ---                          | Mus musculus, clone IMAGE:1512359, mRNA                                                                                                 | 1434766 at   | -1.97 | 0.00 |
| <i>Gup1</i>                  | Gup1, glycerol uptake/transporter homolog (yeast)                                                                                       | 1424553 at   | -1.97 | 0.00 |
| <i>Rwdd4a</i>                | RWD domain containing 4A                                                                                                                | 1457983 s at | -1.97 | 0.00 |
| <i>Gas2l3</i>                | growth arrest-specific 2 like 3                                                                                                         | 1453416 at   | -1.98 | 0.00 |
| <i>Hdgfip3 /// Tm6sf1</i>    | hepatoma-derived growth factor, related protein 3 /// transmembrane 6 superfamily member 1                                              | 1424443 at   | -1.98 | 0.00 |
| <i>A930031D07Rik</i>         | RIKEN cDNA A930031D07 gene                                                                                                              | 1436021 at   | -1.98 | 0.00 |
| ---                          | ---                                                                                                                                     | 1417466 at   | -1.98 | 0.00 |
| <i>Fbln1</i>                 | fibulin 1                                                                                                                               | 1422540 at   | -1.98 | 0.00 |
| <i>Txndc14 /// LOC433144</i> | thioredoxin domain containing 14 /// similar to thioredoxin-related transmembrane protein 2                                             | 1437454_a at | -1.98 | 0.00 |
| <i>Abcc9</i>                 | ATP-binding cassette, sub-family C (CFTR/MRP), member 9                                                                                 | 1435752 s at | -1.98 | 0.00 |
| <i>6030490I01Rik</i>         | RIKEN cDNA 6030490I01 gene                                                                                                              | 1437873 at   | -1.98 | 0.00 |
| ---                          | ---                                                                                                                                     | 1438796 at   | -1.98 | 0.00 |
| <i>Pctk2</i>                 | PCTAIRE-motif protein kinase 2                                                                                                          | 1435143 at   | -1.98 | 0.00 |
| <i>4732466D17Rik</i>         | RIKEN cDNA 4732466D17 gene                                                                                                              | 1438980 x at | -1.98 | 0.00 |
| ---                          | Adult male corpora quadrigemina cDNA, RIKEN full-length enriched library, clone:B230306E21 product:unclassifiable, full insert sequence | 1439994 at   | -1.98 | 0.00 |
| <i>Golga4</i>                | golgi autoantigen, golgin subfamily a, 4                                                                                                | 1448803 at   | -1.98 | 0.00 |
| <i>Kcna1</i>                 | potassium voltage-gated channel, shaker-related subfamily, member 1                                                                     | 1417416 at   | -1.98 | 0.00 |
| ---                          | Adult male urinary bladder cDNA, RIKEN full-length enriched library, clone:9530098H01 product:unclassifiable, full insert sequence      | 1441885_s at | -1.98 | 0.00 |
| <i>Esrrb</i>                 | estrogen related receptor, beta                                                                                                         | 1436926 at   | -1.99 | 0.00 |
| <i>Slc25a19</i>              | solute carrier family 25 (mitochondrial deoxynucleotide carrier), member 19                                                             | 1424316 at   | -1.99 | 0.00 |
| <i>6430601A21Rik</i>         | RIKEN cDNA 6430601A21 gene                                                                                                              | 1434682 at   | -1.99 | 0.00 |
| <i>Rpre1</i>                 | arginine/proline rich coiled-coil 1                                                                                                     | 1424040 at   | -1.99 | 0.00 |
| <i>Efnb2</i>                 | ephrin B2                                                                                                                               | 1419638 at   | -1.99 | 0.00 |
| <i>BC054438</i>              | cDNA sequence BC054438                                                                                                                  | 1447915 x at | -1.99 | 0.00 |
| <i>Rasgrp2</i>               | RAS, guanyl releasing protein 2                                                                                                         | 1442264 at   | -1.99 | 0.00 |
| <i>Trak2</i>                 | trafficking protein, kinesin binding 2                                                                                                  | 1435016 at   | -1.99 | 0.00 |
| ---                          | ---                                                                                                                                     | 1444269 at   | -1.99 | 0.00 |
| <i>Arl15</i>                 | ADP-ribosylation factor-like 15                                                                                                         | 1458605 at   | -1.99 | 0.00 |
| <i>Orsl1</i>                 | glutaminyl-tRNA synthase (glutamine-hydrolyzing)-like 1                                                                                 | 1429317 at   | -1.99 | 0.00 |
| ---                          | ---                                                                                                                                     | 1422697 s at | -1.99 | 0.00 |
| <i>Hk2</i>                   | hexokinase 2                                                                                                                            | 1422612 at   | -1.99 | 0.00 |
| ---                          | ---                                                                                                                                     | 1459219 at   | -1.99 | 0.00 |
| <i>D7Erd715e</i>             | DNA segment, Chr 7, ERATO Doi 715, expressed                                                                                            | 1455087 at   | -1.99 | 0.00 |
| <i>I110032E23Rik</i>         | RIKEN cDNA I110032E23 gene                                                                                                              | 1459490 at   | -1.99 | 0.00 |
| <i>Pbx1</i>                  | Pre B-cell leukemia transcription factor 1                                                                                              | 1430183 at   | -1.99 | 0.00 |
| <i>Ppm1a</i>                 | protein phosphatase 1A, magnesium dependent, alpha isoform                                                                              | 1425537 at   | -1.99 | 0.00 |
| <i>Zbtb20</i>                | zinc finger and BTB domain containing 20                                                                                                | 1437066 at   | -1.99 | 0.00 |
| <i>Gfra1</i>                 | glial cell line derived neurotrophic factor family receptor alpha 1                                                                     | 1439015 at   | -2.00 | 0.00 |
| <i>4833428M15Rik</i>         | RIKEN cDNA 4833428M15 gene                                                                                                              | 1431471 at   | -2.00 | 0.00 |
| <i>Dhrs7c</i>                | dehydrogenase/reductase (SDR family) member 7C                                                                                          | 1444504 at   | -2.00 | 0.00 |
| <i>Arhgef6</i>               | Rac/Cdc42 guanine nucleotide exchange factor (GEF) 6                                                                                    | 1442292 at   | -2.00 | 0.00 |
| <i>Srxn2</i>                 | sushi-repeat-containing protein, X-linked 2                                                                                             | 1427919 at   | -2.00 | 0.00 |
| <i>Ppm1k</i>                 | protein phosphatase 1K (PP2C domain containing)                                                                                         | 1441988 at   | -2.00 | 0.00 |
| <i>Pbx1</i>                  | Pre B-cell leukemia transcription factor 1                                                                                              | 1442846 at   | -2.00 | 0.00 |
| <i>Pbx1</i>                  | pre B-cell leukemia transcription factor 1                                                                                              | 1440037 at   | -2.00 | 0.00 |
| <i>Mar-07</i>                | membrane-associated ring finger (C3HC4) 7                                                                                               | 1440966 at   | -2.00 | 0.00 |
| <i>4930402H24Rik</i>         | RIKEN cDNA 4930402H24 gene                                                                                                              | 1430285 at   | -2.00 | 0.00 |
| <i>Slc4a3</i>                | solute carrier family 4 (anion exchanger), member 3                                                                                     | 1453687 at   | -2.00 | 0.00 |
| <i>Adrb1</i>                 | adrenergic receptor, beta 1                                                                                                             | 1423420 at   | -2.01 | 0.00 |
| <i>Kcnn2</i>                 | potassium intermediate/small conductance calcium-activated channel, subfamily N, member 2                                               | 1448927_at   | -2.01 | 0.00 |
| ---                          | Adult male olfactory brain cDNA, RIKEN full-length enriched library, clone:6430530M09 product:unclassifiable, full insert sequence      | 1460061_at   | -2.01 | 0.00 |
| <i>Ppara</i>                 | peroxisome proliferator activated receptor alpha                                                                                        | 1449051 at   | -2.01 | 0.00 |
| <i>Mtss1</i>                 | metastasis suppressor 1                                                                                                                 | 1424826 s at | -2.01 | 0.00 |
| <i>Ankrd25</i>               | ankyrin repeat domain 25                                                                                                                | 1425991 a at | -2.01 | 0.00 |
| <i>Chchd3</i>                | coiled-coil-helix-coiled-coil-helix domain containing 3                                                                                 | 1459143 at   | -2.01 | 0.00 |
| <i>Dpysl4</i>                | dihydropyrimidinase-like 4                                                                                                              | 1418298 s at | -2.01 | 0.00 |
| ---                          | ---                                                                                                                                     | 1456625 at   | -2.01 | 0.00 |
| <i>Cacnb2</i>                | calcium channel, voltage-dependent, beta 2 subunit                                                                                      | 1456401 at   | -2.01 | 0.00 |
| ---                          | Transcribed locus                                                                                                                       | 1458309 at   | -2.01 | 0.00 |
| <i>Itgb1bp2</i>              | integrin beta 1 binding protein 2                                                                                                       | 1423238 at   | -2.01 | 0.00 |



|                      |                                                                                                                                 |              |       |      |
|----------------------|---------------------------------------------------------------------------------------------------------------------------------|--------------|-------|------|
| ---                  | 13 days embryo heart cDNA, RIKEN full-length enriched library, clone:D330025O06<br>product:unclassifiable, full insert sequence | 1458081_at   | -2.01 | 0.00 |
| <i>Neo1</i>          | neogenin                                                                                                                        | 1444295_at   | -2.01 | 0.00 |
| <i>Nnat</i>          | neuronatin                                                                                                                      | 1423506_a_at | -2.02 | 0.00 |
| <i>Gucy1a3</i>       | guanylate cyclase 1, soluble, alpha 3                                                                                           | 1420533_at   | -2.02 | 0.00 |
| <i>Sik23</i>         | serine/threonine kinase 23                                                                                                      | 1418798_s_at | -2.02 | 0.00 |
| <i>1300001I01Rik</i> | RIKEN cDNA 1300001I01 gene                                                                                                      | 1428106_at   | -2.02 | 0.00 |
| <i>Car7</i>          | carbonic anhydrase 7                                                                                                            | 1443824_s_at | -2.02 | 0.00 |
| <i>1500005K14Rik</i> | RIKEN cDNA 1500005K14 gene                                                                                                      | 1456603_at   | -2.02 | 0.00 |
| <i>2410025L10Rik</i> | RIKEN cDNA 2410025L10 gene                                                                                                      | 1428404_at   | -2.02 | 0.00 |
| <i>Efnb2</i>         | ephrin B2                                                                                                                       | 1419639_at   | -2.02 | 0.00 |
| <i>BC004004</i>      | cDNA sequence BC004004                                                                                                          | 1416608_a_at | -2.02 | 0.00 |
| <i>Homer1</i>        | homer homolog 1 (Drosophila)                                                                                                    | 1425710_a_at | -2.02 | 0.00 |
| <i>Zfp191</i>        | zinc finger protein 191                                                                                                         | 1426896_at   | -2.02 | 0.00 |
| <i>Mapre2</i>        | microtubule-associated protein, RP/EB family, member 2                                                                          | 1451989_a_at | -2.02 | 0.00 |
| <i>Pfkfb2</i>        | 6-phosphofructo-2-kinase/fructose-2,6-bisphosphatase 2                                                                          | 1422090_a_at | -2.02 | 0.00 |
| <i>Lama2</i>         | laminin, alpha 2                                                                                                                | 1426285_at   | -2.02 | 0.00 |
| <i>Sync</i>          | syncoilin                                                                                                                       | 1422118_at   | -2.02 | 0.00 |
| <i>Hist2h2be</i>     | histone 2, H2be                                                                                                                 | 1447854_s_at | -2.03 | 0.00 |
| <i>D7Wsu130e</i>     | DNA segment, Chr 7, Wayne State University 130, expressed                                                                       | 1458040_at   | -2.03 | 0.01 |
| <i>2310014F07Rik</i> | RIKEN cDNA 2310014F07 gene                                                                                                      | 1453552_at   | -2.03 | 0.00 |
| <i>Rwdd4a</i>        | RWD domain containing 4A                                                                                                        | 1424243_at   | -2.03 | 0.00 |
| <i>4930534B04Rik</i> | RIKEN cDNA 4930534B04 gene                                                                                                      | 1429229_s_at | -2.03 | 0.00 |
| <i>Rgs5</i>          | regulator of G-protein signaling 5                                                                                              | 1420940_x_at | -2.03 | 0.00 |
| <i>Slc2a12</i>       | solute carrier family 2 (facilitated glucose transporter), member 12                                                            | 1435911_s_at | -2.03 | 0.00 |
| <i>5430416B10Rik</i> | RIKEN cDNA 5430416B10 gene                                                                                                      | 1454558_at   | -2.03 | 0.00 |
| <i>BC053994</i>      | cDNA sequence BC053994                                                                                                          | 1455750_at   | -2.03 | 0.00 |
| <i>Pde7a</i>         | phosphodiesterase 7A                                                                                                            | 1450933_at   | -2.04 | 0.00 |
| <i>Nr3c1</i>         | nuclear receptor subfamily 3, group C, member 1                                                                                 | 1460303_at   | -2.04 | 0.00 |
| <i>Ndr4</i>          | N-myc downstream regulated gene 4                                                                                               | 1426615_s_at | -2.04 | 0.00 |
| <i>Doc2g</i>         | double C2, gamma                                                                                                                | 1450707_at   | -2.04 | 0.00 |
| <i>Dnaj4</i>         | DnaJ (Hsp40) homolog, subfamily A, member 4                                                                                     | 1434196_at   | -2.04 | 0.00 |
| <i>Arhgap20</i>      | Rho GTPase activating protein 20                                                                                                | 1427522_at   | -2.05 | 0.00 |
| <i>1700113I22Rik</i> | RIKEN cDNA 1700113I22 gene                                                                                                      | 1432073_at   | -2.05 | 0.00 |
| <i>Asb5</i>          | ankyrin repeat and SOCs box-containing protein 5                                                                                | 1449356_at   | -2.05 | 0.00 |
| <i>2310061C15Rik</i> | RIKEN cDNA 2310061C15 gene                                                                                                      | 1427922_at   | -2.05 | 0.00 |
| <i>Klhl4</i>         | kelch-like 4 (Drosophila)                                                                                                       | 1439078_at   | -2.05 | 0.00 |
| <i>9430082L08Rik</i> | RIKEN cDNA 9430082L08 gene                                                                                                      | 1430929_at   | -2.05 | 0.00 |
| <i>Ccnd2</i>         | cyclin D2                                                                                                                       | 1416122_at   | -2.05 | 0.00 |
| <i>Entpd5</i>        | ectonucleoside triphosphate diphosphohydrolase 5                                                                                | 1433763_at   | -2.05 | 0.00 |
| <i>Sost</i>          | sclerostin                                                                                                                      | 1450179_at   | -2.06 | 0.00 |
| <i>Myl7</i>          | myosin, light polypeptide 7, regulatory                                                                                         | 1449071_at   | -2.06 | 0.00 |
| ---                  | ---                                                                                                                             | 1455539_at   | -2.06 | 0.00 |
| <i>2610018G03Rik</i> | RIKEN cDNA 2610018G03 gene                                                                                                      | 1419033_at   | -2.06 | 0.00 |
| <i>Fgf7</i>          | fibroblast growth factor 7                                                                                                      | 1438405_at   | -2.06 | 0.00 |
| <i>Myc1</i>          | myc target 1                                                                                                                    | 1452072_at   | -2.06 | 0.00 |
| <i>Sh3d19</i>        | SH3 domain protein D19                                                                                                          | 1449084_s_at | -2.06 | 0.00 |
| <i>Tcea3</i>         | transcription elongation factor A (SII), 3                                                                                      | 1424531_a_at | -2.06 | 0.00 |
| <i>Acp12</i>         | acid phosphatase-like 2                                                                                                         | 1429390_at   | -2.06 | 0.00 |
| <i>Fndc5</i>         | fibronectin type III domain containing 5                                                                                        | 1453135_at   | -2.06 | 0.00 |
| <i>Rhpn2</i>         | rhophilin, Rho GTPase binding protein 2                                                                                         | 1434628_a_at | -2.06 | 0.00 |
| ---                  | Transcribed locus                                                                                                               | 1457306_at   | -2.06 | 0.00 |
| <i>Gng11</i>         | guanine nucleotide binding protein (G protein), gamma 11                                                                        | 1448942_at   | -2.06 | 0.00 |
| <i>Gas2l3</i>        | growth arrest-specific 2 like 3                                                                                                 | 1455980_a_at | -2.06 | 0.00 |
| <i>Smyd1</i>         | SET and MYND domain containing 1                                                                                                | 1441667_s_at | -2.06 | 0.00 |
| <i>Ebf1</i>          | early B-cell factor 1                                                                                                           | 1416301_a_at | -2.06 | 0.00 |
| <i>Chchd3</i>        | Coiled-coil-helix-coiled-coil-helix domain containing 3                                                                         | 1437599_at   | -2.07 | 0.00 |
| <i>Slc24a3</i>       | solute carrier family 24 (sodium/potassium/calcium exchanger), member 3                                                         | 1424308_at   | -2.07 | 0.00 |
| <i>Ncam1</i>         | neural cell adhesion molecule 1                                                                                                 | 1426865_a_at | -2.07 | 0.00 |
| <i>Prrx1</i>         | paired related homeobox 1                                                                                                       | 1439774_at   | -2.07 | 0.00 |
| <i>Sema3b</i>        | sema domain, immunoglobulin domain (Ig), short basic domain, secreted, (semaphorin) 3B                                          | 1448415_a_at | -2.07 | 0.00 |
| <i>Olfml3</i>        | olfactomedin-like 3                                                                                                             | 1448475_at   | -2.08 | 0.00 |
| <i>BF642829</i>      | expressed sequence BF642829                                                                                                     | 1435484_at   | -2.08 | 0.00 |
| <i>Slc38a3</i>       | solute carrier family 38, member 3                                                                                              | 1418706_at   | -2.08 | 0.00 |
| <i>Fbln2</i>         | fibulin 2                                                                                                                       | 1423407_a_at | -2.08 | 0.00 |
| <i>Aqp7</i>          | aquaporin 7                                                                                                                     | 1418848_at   | -2.08 | 0.00 |
| <i>Heyl</i>          | hairy/enhancer-of-split related with YRPW motif-like                                                                            | 1438886_at   | -2.08 | 0.00 |
| ---                  | Transcribed locus                                                                                                               | 1458585_at   | -2.08 | 0.00 |
| ---                  | Transcribed locus                                                                                                               | 1457373_at   | -2.08 | 0.00 |
| <i>Hnt</i>           | neurotrimin                                                                                                                     | 1458492_x_at | -2.08 | 0.00 |
| <i>Sesn3</i>         | sestrin 3                                                                                                                       | 1453313_at   | -2.08 | 0.00 |
| <i>Mrm1</i>          | mitochondrial rRNA methyltransferase 1 homolog (S. cerevisiae)                                                                  | 1424219_at   | -2.08 | 0.00 |
| <i>Olf78</i>         | olfactory receptor 78                                                                                                           | 1440009_at   | -2.08 | 0.00 |
| <i>Msr2</i>          | macrophage scavenger receptor 2                                                                                                 | 1448891_at   | -2.09 | 0.00 |
| <i>Pgm2l1</i>        | phosphoglucomutase 2-like 1                                                                                                     | 1452841_at   | -2.09 | 0.00 |
| <i>Kciv2</i>         | potassium channel, subfamily V, member 2                                                                                        | 1440537_at   | -2.09 | 0.00 |
| <i>Rgs2</i>          | regulator of G-protein signaling 2                                                                                              | 1419248_at   | -2.09 | 0.00 |
| <i>A1118064</i>      | Expressed sequence A1118064                                                                                                     | 1457721_at   | -2.09 | 0.00 |
| <i>Ryr3</i>          | ryanodine receptor 3                                                                                                            | 1427427_at   | -2.09 | 0.00 |
| <i>Tgfb1</i>         | transforming growth factor, beta induced                                                                                        | 1448123_s_at | -2.09 | 0.00 |
| <i>AW061234</i>      | expressed sequence AW061234                                                                                                     | 1454984_at   | -2.09 | 0.00 |
| <i>Mfhas1</i>        | Malignant fibrous histiocytoma amplified sequence 1                                                                             | 1439929_at   | -2.09 | 0.00 |
| <i>Lynx1</i>         | Ly6/neurotoxin 1                                                                                                                | 1441952_x_at | -2.09 | 0.00 |
| <i>Atp2b2</i>        | ATPase, Ca <sup>++</sup> transporting, plasma membrane 2                                                                        | 1433888_at   | -2.09 | 0.00 |
| <i>Mgl2</i>          | macrophage galactose N-acetyl-galactosamine specific lectin 2                                                                   | 1438467_at   | -2.10 | 0.00 |
| <i>Pdxx</i>          | PDZ domain containing, X chromosome                                                                                             | 1449834_at   | -2.10 | 0.00 |
| <i>Tspan12</i>       | tetraspanin 12                                                                                                                  | 1454604_s_at | -2.10 | 0.00 |
| <i>Tgfb1</i>         | transforming growth factor, beta induced                                                                                        | 1456250_x_at | -2.10 | 0.00 |
| <i>Col14a1</i>       | procollagen, type XIV, alpha 1                                                                                                  | 1428455_at   | -2.10 | 0.00 |
| <i>1700110N18Rik</i> | RIKEN cDNA 1700110N18 gene                                                                                                      | 1453593_at   | -2.10 | 0.00 |
| <i>Vit</i>           | vitrin                                                                                                                          | 1426231_at   | -2.10 | 0.00 |
| <i>C330006P03Rik</i> | RIKEN cDNA C330006P03 gene                                                                                                      | 1436387_at   | -2.10 | 0.00 |
| <i>Apcdd1</i>        | adenomatous polyposis coli down-regulated 1                                                                                     | 1454822_x_at | -2.10 | 0.00 |
| <i>9530058B02Rik</i> | RIKEN cDNA 9530058B02 gene                                                                                                      | 1417212_at   | -2.10 | 0.00 |
| <i>Jarid2</i>        | Jumonji, AT rich interactive domain 2                                                                                           | 1456661_at   | -2.10 | 0.00 |
| <i>Slk</i>           | STE20-like kinase (yeast)                                                                                                       | 1441262_at   | -2.10 | 0.00 |

|                               |                                                                                                                                    |              |       |      |
|-------------------------------|------------------------------------------------------------------------------------------------------------------------------------|--------------|-------|------|
| <i>Igf1</i>                   | insulin-like growth factor 1                                                                                                       | 1452014 a at | -2.10 | 0.00 |
| <i>Nr1d2</i>                  | nuclear receptor subfamily 1, group D, member 2                                                                                    | 1416958 at   | -2.11 | 0.00 |
| <i>Ppargc1a</i>               | peroxisome proliferative activated receptor, gamma, coactivator 1 alpha                                                            | 1456395 at   | -2.11 | 0.00 |
| <i>Ptpr</i>                   | protein tyrosine phosphatase, receptor type, R                                                                                     | 1426047 a at | -2.11 | 0.00 |
| <i>Cygb</i>                   | cytoglobin                                                                                                                         | 1423630 at   | -2.11 | 0.00 |
| ---                           | 0 day neonate eyeball cDNA, RIKEN full-length enriched library, clone:E130004J04<br>product:unclassifiable, full insert sequence   | 1439906_at   | -2.11 | 0.00 |
| <i>Ches1</i>                  | Checkpoint suppressor 1                                                                                                            | 1447325 at   | -2.12 | 0.00 |
| <i>Neb1</i>                   | nebullette                                                                                                                         | 1438452 at   | -2.12 | 0.00 |
| <i>Phf2</i>                   | putative homeodomain transcription factor 2                                                                                        | 1437067 at   | -2.12 | 0.00 |
| <i>Prnd</i>                   | prion protein dublet                                                                                                               | 1425681 a at | -2.12 | 0.00 |
| <i>Pon1</i>                   | paraoxonase 1                                                                                                                      | 1418190 at   | -2.12 | 0.00 |
| <i>Kif6</i>                   | kinesin family member 6                                                                                                            | 1442238 a at | -2.12 | 0.00 |
| <i>Daam1</i>                  | dishevelled associated activator of morphogenesis 1                                                                                | 1431035 at   | -2.12 | 0.00 |
| <i>Plcb1</i>                  | phospholipase C, beta 1                                                                                                            | 1435043 at   | -2.12 | 0.00 |
| <i>Sdc1</i>                   | syndecan 1                                                                                                                         | 1437279 x at | -2.12 | 0.00 |
| <i>Pitpnc1</i>                | phosphatidylinositol transfer protein, cytoplasmic 1                                                                               | 1435066 at   | -2.12 | 0.00 |
| <i>Nr1d2</i>                  | nuclear receptor subfamily 1, group D, member 2                                                                                    | 1416959 at   | -2.12 | 0.00 |
| <i>Lbh</i>                    | limb-bud and heart                                                                                                                 | 1451629 at   | -2.12 | 0.00 |
| <i>Ramp1</i>                  | receptor (calcitonin) activity modifying protein 1                                                                                 | 1417481 at   | -2.12 | 0.00 |
| <i>Dusp18</i>                 | dual specificity phosphatase 18                                                                                                    | 1451270 at   | -2.12 | 0.00 |
| <i>2700081O15Rik</i>          | RIKEN cDNA 2700081O15 gene                                                                                                         | 1437291 at   | -2.13 | 0.00 |
| <i>1700012H17Rik</i>          | RIKEN cDNA 1700012H17 gene                                                                                                         | 1437150 at   | -2.13 | 0.00 |
| <i>Hspb3</i>                  | heat shock protein 3                                                                                                               | 1449872 at   | -2.13 | 0.00 |
| <i>Mvo6</i>                   | myosin VI                                                                                                                          | 1435559 at   | -2.13 | 0.00 |
| <i>1700020114Rik</i>          | RIKEN cDNA 1700020114 gene                                                                                                         | 1428411 at   | -2.13 | 0.00 |
| <i>Mest</i>                   | mesoderm specific transcript                                                                                                       | 1423294 at   | -2.13 | 0.00 |
| <i>Antxr1</i>                 | anthrax toxin receptor 1                                                                                                           | 1451446 at   | -2.13 | 0.00 |
| <i>NdrG4</i>                  | N-myc downstream regulated gene 4                                                                                                  | 1436188 a at | -2.13 | 0.00 |
| <i>Nid2</i>                   | nidogen 2                                                                                                                          | 1423516 a at | -2.13 | 0.00 |
| <i>Abcc9</i>                  | ATP-binding cassette, sub-family C (CFTR/MRP), member 9                                                                            | 1420408 a at | -2.14 | 0.00 |
| <i>Fat4</i>                   | FAT tumor suppressor homolog 4 (Drosophila)                                                                                        | 1459749 s at | -2.14 | 0.00 |
| <i>Mtss1</i>                  | metastasis suppressor 1                                                                                                            | 1434036 at   | -2.14 | 0.00 |
| <i>Itg6</i>                   | integrin beta 6                                                                                                                    | 1422983 at   | -2.14 | 0.00 |
| <i>6330407118Rik</i>          | RIKEN cDNA 6330407118 gene                                                                                                         | 1429579 at   | -2.14 | 0.00 |
| <i>Slc36a2</i>                | solute carrier family 36 (proton/amino acid symporter), member 2                                                                   | 1436521 at   | -2.14 | 0.00 |
| <i>2310061C15Rik</i>          | RIKEN cDNA 2310061C15 gene                                                                                                         | 1452597 at   | -2.14 | 0.00 |
| <i>Serpinf1</i>               | serine (or cysteine) peptidase inhibitor, clade F, member 1                                                                        | 1416168 at   | -2.14 | 0.00 |
| <i>Abca8b</i>                 | ATP-binding cassette, sub-family A (ABC1), member 8b                                                                               | 1427546 at   | -2.14 | 0.00 |
| <i>Stxbp6</i>                 | syntaxin binding protein 6 (amisvn)                                                                                                | 1435396 at   | -2.14 | 0.00 |
| <i>Nrp1</i>                   | neuropilin 1                                                                                                                       | 1457198 at   | -2.14 | 0.00 |
| <i>Rps6ka5</i>                | ribosomal protein S6 kinase, polypeptide 5                                                                                         | 1440343 at   | -2.14 | 0.00 |
| <i>2700089E24Rik</i>          | RIKEN cDNA 2700089E24 gene                                                                                                         | 1460464 at   | -2.15 | 0.01 |
| <i>Ephb1</i>                  | Eph receptor B1                                                                                                                    | 1455188 at   | -2.15 | 0.00 |
| <i>Cpxm1</i>                  | carboxypeptidase X 1 (M14 family)                                                                                                  | 1448901 at   | -2.15 | 0.00 |
| ---                           | Adult male diencephalon cDNA, RIKEN full-length enriched library, clone:9330183L06<br>product:unclassifiable, full insert sequence | 1438778_at   | -2.15 | 0.00 |
| <i>1110003E01Rik</i>          | RIKEN cDNA 1110003E01 gene                                                                                                         | 1435464 at   | -2.15 | 0.00 |
| <i>Matn2</i>                  | matrilin 2                                                                                                                         | 1455978 a at | -2.15 | 0.00 |
| <i>Prdm16</i>                 | PR domain containing 16                                                                                                            | 1440870 at   | -2.15 | 0.00 |
| <i>BC072620</i>               | cDNA sequence BC072620                                                                                                             | 1456838 at   | -2.15 | 0.00 |
| <i>Fndc1</i>                  | fibronectin type III domain containing 1                                                                                           | 1453321 at   | -2.15 | 0.00 |
| <i>Clec7a</i>                 | C-type lectin domain family 7, member a                                                                                            | 1420699 at   | -2.15 | 0.00 |
| <i>LOC629378 // LOC666671</i> | hypothetical protein LOC629378 // similar to thymus expressed gene 3-like                                                          | 1434415 at   | -2.15 | 0.00 |
| <i>Ptprb</i>                  | Protein tyrosine phosphatase, receptor type, B                                                                                     | 1436367 at   | -2.15 | 0.00 |
| <i>1110058L19Rik</i>          | RIKEN cDNA 1110058L19 gene                                                                                                         | 1418327 at   | -2.15 | 0.00 |
| <i>C330008K14Rik</i>          | RIKEN cDNA C330008K14 gene                                                                                                         | 1436194 at   | -2.15 | 0.00 |
| <i>8030447M02Rik</i>          | RIKEN cDNA 8030447M02 gene                                                                                                         | 1458601 at   | -2.15 | 0.00 |
| <i>A730009E18Rik</i>          | RIKEN cDNA A730009E18 gene                                                                                                         | 1460147 at   | -2.15 | 0.00 |
| <i>Mef2c</i>                  | myocyte enhancer factor 2C                                                                                                         | 1424852 at   | -2.15 | 0.00 |
| <i>D13Bwg1146e</i>            | DNA segment, Chr 13, Brigham & Women's Genetics 1146 expressed                                                                     | 1457743 at   | -2.16 | 0.00 |
| <i>Mfap3l</i>                 | microfibrillar-associated protein 3-like                                                                                           | 1428804 at   | -2.16 | 0.00 |
| <i>Tnfrsf19</i>               | tumor necrosis factor receptor superfamily, member 19                                                                              | 1448147 at   | -2.16 | 0.00 |
| <i>Pitpnc1</i>                | phosphatidylinositol transfer protein, cytoplasmic 1                                                                               | 1428025 s at | -2.16 | 0.00 |
| <i>Ptin</i>                   | pleiotrophin                                                                                                                       | 1448254 at   | -2.16 | 0.00 |
| <i>Slc9a9</i>                 | solute carrier family 9 (sodium/hydrogen exchanger), isoform 9                                                                     | 1433719 at   | -2.16 | 0.00 |
| <i>Ebf3</i>                   | early B-cell factor 3                                                                                                              | 1460666 a at | -2.16 | 0.00 |
| <i>6430601A21Rik</i>          | RIKEN cDNA 6430601A21 gene                                                                                                         | 1437305 at   | -2.16 | 0.00 |
| <i>Nfia</i>                   | nuclear factor I/A                                                                                                                 | 1438236 at   | -2.16 | 0.00 |
| <i>Osbpl6</i>                 | oxysterol binding protein-like 6                                                                                                   | 1457881 at   | -2.17 | 0.00 |
| <i>RbmX</i>                   | RNA binding motif protein, X chromosome                                                                                            | 1426863 at   | -2.17 | 0.00 |
| <i>Cidec</i>                  | cell death-inducing DFFA-like effector c                                                                                           | 1452260 at   | -2.17 | 0.00 |
| ---                           | ---                                                                                                                                | 1420942 s at | -2.17 | 0.00 |
| <i>Nope</i>                   | neighbor of Punc E11                                                                                                               | 1416473 a at | -2.17 | 0.00 |
| <i>Tpm2</i>                   | tropomyosin 2, beta                                                                                                                | 1419738 a at | -2.17 | 0.00 |
| <i>Mdh1</i>                   | malate dehydrogenase 1, NAD (soluble)                                                                                              | 1438338 at   | -2.17 | 0.00 |
| <i>1110018M03Rik</i>          | RIKEN cDNA 1110018M03 gene                                                                                                         | 1419376 at   | -2.17 | 0.00 |
| ---                           | ---                                                                                                                                | 1438041 at   | -2.17 | 0.00 |
| <i>Scn7a</i>                  | sodium channel, voltage-gated, type VII, alpha                                                                                     | 1427495 at   | -2.17 | 0.00 |
| <i>Nfib</i>                   | nuclear factor I/B                                                                                                                 | 1434101 at   | -2.18 | 0.00 |
| <i>2310068J10Rik</i>          | RIKEN cDNA 2310068J10 gene                                                                                                         | 1435399 at   | -2.18 | 0.00 |
| <i>VegfC</i>                  | vascular endothelial growth factor C                                                                                               | 1439766 x at | -2.18 | 0.00 |
| <i>6330417G04Rik</i>          | RIKEN cDNA 6330417G04 gene                                                                                                         | 1440849 at   | -2.18 | 0.00 |
| <i>Prrx1</i>                  | paired related homeobox 1                                                                                                          | 1425526 a at | -2.18 | 0.00 |
| <i>E130203B14Rik</i>          | RIKEN cDNA E130203B14 gene                                                                                                         | 1455050 at   | -2.18 | 0.00 |
| <i>Sep-04</i>                 | septin 4                                                                                                                           | 1448729 a at | -2.18 | 0.00 |
| <i>Casq2</i>                  | calsequestrin 2                                                                                                                    | 1422529 s at | -2.19 | 0.00 |
| <i>A1605517</i>               | expressed sequence A1605517                                                                                                        | 1457797 at   | -2.19 | 0.00 |
| <i>1110003F05Rik</i>          | RIKEN cDNA 1110003F05 gene                                                                                                         | 1429735 at   | -2.19 | 0.00 |
| <i>Ppp1r12b</i>               | Protein phosphatase 1, regulatory (inhibitor) subunit 12B                                                                          | 1457338 at   | -2.19 | 0.00 |
| <i>Tcf21</i>                  | transcription factor 21                                                                                                            | 1417447 at   | -2.19 | 0.00 |
| <i>Bach2</i>                  | BTB and CNC homology 2                                                                                                             | 1437667 a at | -2.19 | 0.00 |
| <i>Ptprd</i>                  | protein tyrosine phosphatase, receptor type, D                                                                                     | 1429052 at   | -2.19 | 0.00 |
| <i>Sep-04</i>                 | septin 4                                                                                                                           | 1455422 x at | -2.20 | 0.00 |
| <i>Adcy7</i>                  | adenylate cyclase 7                                                                                                                | 1450065 at   | -2.20 | 0.00 |
| <i>Chek2</i>                  | CHK2 checkpoint homolog (S. pombe)                                                                                                 | 1422747 at   | -2.20 | 0.00 |
| ---                           | ---                                                                                                                                | 1440989 at   | -2.20 | 0.00 |

|                                         |                                                                                                                                                                                                                             |              |       |      |
|-----------------------------------------|-----------------------------------------------------------------------------------------------------------------------------------------------------------------------------------------------------------------------------|--------------|-------|------|
| <i>Ndufab1</i>                          | NADH dehydrogenase (ubiquinone) 1, alpha/beta subcomplex, 1                                                                                                                                                                 | 1435934 at   | -2.20 | 0.00 |
| <i>Timp2</i>                            | tissue inhibitor of metalloproteinase 2                                                                                                                                                                                     | 1450040 at   | -2.20 | 0.00 |
| <i>1110007C02Rik</i>                    | RIKEN cDNA 1110007C02 gene                                                                                                                                                                                                  | 1429189 at   | -2.20 | 0.00 |
| <i>Ppp1r14a</i>                         | protein phosphatase 1, regulatory (inhibitor) subunit 14A                                                                                                                                                                   | 1418086 at   | -2.20 | 0.00 |
| <i>Cyp2e1</i>                           | cytochrome P450, family 2, subfamily e, polypeptide 1                                                                                                                                                                       | 1415994 at   | -2.20 | 0.01 |
| <i>Col6a1</i>                           | procollagen, type VI, alpha 1                                                                                                                                                                                               | 1448590 at   | -2.21 | 0.01 |
| <i>Col4a4</i>                           | procollagen, type IV, alpha 4                                                                                                                                                                                               | 1440250 at   | -2.21 | 0.00 |
| <i>Opcml</i>                            | opioid binding protein/cell adhesion molecule-like                                                                                                                                                                          | 1457446 at   | -2.21 | 0.00 |
| <i>Dnmt3a</i>                           | DNA methyltransferase 3A                                                                                                                                                                                                    | 1442309 at   | -2.21 | 0.00 |
| <i>Kctd12b</i>                          | potassium channel tetramerisation domain containing 12b                                                                                                                                                                     | 1440355 at   | -2.21 | 0.00 |
| <i>Ppargc1a</i>                         | peroxisome proliferative activated receptor, gamma, coactivator 1 alpha                                                                                                                                                     | 1437751 at   | -2.21 | 0.00 |
| ---                                     | ---                                                                                                                                                                                                                         | 1436275 at   | -2.21 | 0.00 |
| <i>Fbxo30</i>                           | F-box protein 30                                                                                                                                                                                                            | 1436550 at   | -2.21 | 0.00 |
| <i>E030004N02Rik</i>                    | RIKEN cDNA E030004N02 gene                                                                                                                                                                                                  | 1436515 at   | -2.22 | 0.00 |
| <i>Magi3</i>                            | membrane associated guanylate kinase, WW and PDZ domain containing 3                                                                                                                                                        | 1435461 at   | -2.22 | 0.00 |
| <i>Rps6ka2</i>                          | ribosomal protein S6 kinase, polypeptide 2                                                                                                                                                                                  | 1417542 at   | -2.22 | 0.00 |
| <i>Ppic7</i>                            | PTC7 protein phosphatase homolog (S. cerevisiae)                                                                                                                                                                            | 1455958 s at | -2.22 | 0.00 |
| <i>Nr3c2</i>                            | nuclear receptor subfamily 3, group C, member 2                                                                                                                                                                             | 1435991 at   | -2.22 | 0.00 |
| <i>2410005O16Rik</i>                    | RIKEN cDNA 2410005O16 gene                                                                                                                                                                                                  | 1438034 at   | -2.22 | 0.00 |
| <i>Pcdh18</i>                           | protocadherin 18                                                                                                                                                                                                            | 1422889 at   | -2.22 | 0.00 |
| <i>Calm1</i>                            | calmodulin 1                                                                                                                                                                                                                | 1433592 at   | -2.22 | 0.00 |
| <i>D630040G17Rik // LOC622675</i>       | RIKEN cDNA D630040G17 gene // similar to zinc finger protein 64 (predicted)                                                                                                                                                 | 1442562 at   | -2.22 | 0.00 |
| <i>Fn3k</i>                             | fructosamine 3 kinase                                                                                                                                                                                                       | 1418311 at   | -2.22 | 0.00 |
| <i>Ar</i>                               | androgen receptor                                                                                                                                                                                                           | 1455647 at   | -2.23 | 0.00 |
| <i>Runx1t1</i>                          | runt-related transcription factor 1; translocated to, 1 (cyclin D-related)                                                                                                                                                  | 1437784 at   | -2.23 | 0.00 |
| <i>D13Erd787e</i>                       | DNA segment, Chr 13, ERATO Doi 787, expressed                                                                                                                                                                               | 1420098 s at | -2.23 | 0.00 |
| <i>1110018J23Rik</i>                    | RIKEN cDNA 1110018J23 gene                                                                                                                                                                                                  | 1429024 at   | -2.23 | 0.00 |
| <i>Sacs</i>                             | sacsin                                                                                                                                                                                                                      | 1434958 at   | -2.23 | 0.00 |
| <i>Crip1</i>                            | cysteine-rich protein 1 (intestinal)                                                                                                                                                                                        | 1416326 at   | -2.23 | 0.00 |
| <i>Akl</i>                              | adenylate kinase 1                                                                                                                                                                                                          | 1422184 a at | -2.23 | 0.00 |
| <i>Alas1</i>                            | aminolevulinic acid synthase 1                                                                                                                                                                                              | 1424126 at   | -2.23 | 0.00 |
| <i>Pank1</i>                            | pantothenate kinase 1                                                                                                                                                                                                       | 1418715 at   | -2.24 | 0.00 |
| <i>Nr3c1</i>                            | nuclear receptor subfamily 3, group C, member 1                                                                                                                                                                             | 1457635 s at | -2.24 | 0.00 |
| <i>Dep1</i>                             | diabetic embryopathy 1                                                                                                                                                                                                      | 1427602 at   | -2.24 | 0.00 |
| <i>Gdf10</i>                            | growth differentiation factor 10                                                                                                                                                                                            | 1424007 at   | -2.24 | 0.00 |
| <i>Ppp1r16b</i>                         | protein phosphatase 1, regulatory (inhibitor) subunit 16B                                                                                                                                                                   | 1455080 at   | -2.24 | 0.00 |
| <i>Pias2</i>                            | protein inhibitor of activated STAT 2                                                                                                                                                                                       | 1428725 at   | -2.24 | 0.00 |
| <i>BC054438</i>                         | cDNA sequence BC054438                                                                                                                                                                                                      | 1436698 x at | -2.24 | 0.00 |
| <i>Syne2</i>                            | synaptic nuclear envelope 2                                                                                                                                                                                                 | 1427982 s at | -2.24 | 0.00 |
| <i>Ndufs4</i>                           | NADH dehydrogenase (ubiquinone) Fe-S protein 4                                                                                                                                                                              | 1418117 at   | -2.24 | 0.00 |
| <i>Ppp1r3c</i>                          | protein phosphatase 1, regulatory (inhibitor) subunit 3C                                                                                                                                                                    | 1425631 at   | -2.25 | 0.00 |
| <i>Mapt</i>                             | microtubule-associated protein tau                                                                                                                                                                                          | 1424719 a at | -2.25 | 0.00 |
| <i>Mbp</i>                              | myelin basic protein                                                                                                                                                                                                        | 1419646 a at | -2.25 | 0.00 |
| <i>Tgfb1</i>                            | transforming growth factor, beta induced                                                                                                                                                                                    | 1415871 at   | -2.25 | 0.00 |
| <i>Esrrg</i>                            | estrogen-related receptor gamma                                                                                                                                                                                             | 1455267 at   | -2.25 | 0.00 |
| <i>BC054438</i>                         | cDNA sequence BC054438                                                                                                                                                                                                      | 1434621 at   | -2.25 | 0.00 |
| <i>2610301F02Rik</i>                    | RIKEN cDNA 2610301F02 gene                                                                                                                                                                                                  | 1447251 x at | -2.25 | 0.00 |
| <i>Acp12</i>                            | acid phosphatase-like 2                                                                                                                                                                                                     | 1456735 x at | -2.25 | 0.00 |
| <i>Ehbp1</i>                            | EH domain binding protein 1                                                                                                                                                                                                 | 1424586 at   | -2.25 | 0.00 |
| <i>Slc4a4</i>                           | solute carrier family 4 (anion exchanger), member 4                                                                                                                                                                         | 1434096 at   | -2.25 | 0.00 |
| <i>Pde5a</i>                            | Phosphodiesterase 5A, cGMP-specific                                                                                                                                                                                         | 1455970 at   | -2.26 | 0.00 |
| <i>4933403F05Rik</i>                    | RIKEN cDNA 4933403F05 gene                                                                                                                                                                                                  | 1434977 at   | -2.26 | 0.00 |
| <i>Nqo2</i>                             | NAD(PH) dehydrogenase, quinone 2                                                                                                                                                                                            | 1436189 at   | -2.26 | 0.00 |
| <i>Pcdh18</i>                           | protocadherin 18                                                                                                                                                                                                            | 1422890 at   | -2.26 | 0.00 |
| <i>Per3</i>                             | period homolog 3 (Drosophila)                                                                                                                                                                                               | 1441445 at   | -2.26 | 0.00 |
| <i>Kif13a</i>                           | Kinesin family member 13A                                                                                                                                                                                                   | 1447853 x at | -2.26 | 0.00 |
| <i>Zadh1</i>                            | zinc binding alcohol dehydrogenase, domain containing 1                                                                                                                                                                     | 1453156 s at | -2.26 | 0.00 |
| <i>Actr3b</i>                           | ARP3 actin-related protein 3 homolog B (yeast)                                                                                                                                                                              | 1435605 at   | -2.26 | 0.00 |
| <i>Stard9 // LOC668856 // LOC670354</i> | START domain containing 9 // similar to StAR-related lipid transfer protein 9 (StARD9) (START domain-containing protein 9) // similar to StAR-related lipid transfer protein 9 (StARD9) (START domain-containing protein 9) | 1436324_at   | -2.26 | 0.00 |
| <i>Mpped2</i>                           | metallophosphoesterase domain containing 2                                                                                                                                                                                  | 1435285 at   | -2.27 | 0.00 |
| ---                                     | Adult male vesicular gland cDNA, RIKEN full-length enriched library, clone:G630023F10 product:unclassifiable, full insert sequence                                                                                          | 1442917_at   | -2.27 | 0.00 |
| <i>Grb14</i>                            | growth factor receptor bound protein 14                                                                                                                                                                                     | 1417673 at   | -2.27 | 0.00 |
| <i>Lims1</i>                            | LIM and senescent cell antigen-like domains 1                                                                                                                                                                               | 1441411 at   | -2.27 | 0.00 |
| <i>Zadh1</i>                            | zinc binding alcohol dehydrogenase, domain containing 1                                                                                                                                                                     | 1433503 at   | -2.27 | 0.00 |
| <i>Btbd3</i>                            | BTB (POZ) domain containing 3                                                                                                                                                                                               | 1433868 at   | -2.27 | 0.00 |
| <i>Slc2a4</i>                           | solute carrier family 2 (facilitated glucose transporter), member 4                                                                                                                                                         | 1415958 at   | -2.27 | 0.00 |
| <i>Lamb3</i>                            | laminin, beta 3                                                                                                                                                                                                             | 1417812 a at | -2.27 | 0.00 |
| <i>Mcc</i>                              | mutated in colorectal cancers                                                                                                                                                                                               | 1438081 at   | -2.27 | 0.00 |
| <i>Cxzc6</i>                            | CXXC finger 6                                                                                                                                                                                                               | 1429448 s at | -2.28 | 0.00 |
| <i>Gpc6</i>                             | Glypican 6                                                                                                                                                                                                                  | 1443201 at   | -2.28 | 0.00 |
| <i>Rasgrp2</i>                          | RAS, guanyl releasing protein 2                                                                                                                                                                                             | 1417804 at   | -2.28 | 0.00 |
| <i>6330436F06Rik</i>                    | RIKEN cDNA 6330436F06 gene                                                                                                                                                                                                  | 1433015 at   | -2.28 | 0.00 |
| <i>Mtss1</i>                            | metastasis suppressor 1                                                                                                                                                                                                     | 1440847 at   | -2.28 | 0.00 |
| <i>2900069M18Rik</i>                    | RIKEN cDNA 2900069M18 gene                                                                                                                                                                                                  | 1460531 at   | -2.28 | 0.00 |
| <i>D15Erd30e</i>                        | DNA segment, Chr 15, ERATO Doi 30, expressed                                                                                                                                                                                | 1442833 at   | -2.29 | 0.00 |
| <i>Pdlim2</i>                           | PDZ and LIM domain 2                                                                                                                                                                                                        | 1423946 at   | -2.29 | 0.00 |
| <i>1500016O10Rik</i>                    | RIKEN cDNA 1500016O10 gene                                                                                                                                                                                                  | 1438641 x at | -2.29 | 0.00 |
| <i>Mrc1</i>                             | mannose receptor, C type 1                                                                                                                                                                                                  | 1450430 at   | -2.29 | 0.00 |
| <i>Pank1</i>                            | pantothenate kinase 1                                                                                                                                                                                                       | 1431028 at   | -2.29 | 0.00 |
| <i>D630040G17Rik // LOC622675</i>       | RIKEN cDNA D630040G17 gene // similar to zinc finger protein 64 (predicted)                                                                                                                                                 | 1439493 at   | -2.29 | 0.00 |
| <i>Slc25a26</i>                         | solute carrier family 25 (mitochondrial carrier, phosphate carrier), member 26                                                                                                                                              | 1428929 s at | -2.30 | 0.00 |
| <i>Sh3rf1</i>                           | SH3 domain containing ring finger 1                                                                                                                                                                                         | 1445178 at   | -2.30 | 0.00 |
| ---                                     | Transcribed locus                                                                                                                                                                                                           | 1445421 at   | -2.30 | 0.00 |
| <i>2610024A01Rik</i>                    | RIKEN cDNA 2610024A01 gene                                                                                                                                                                                                  | 1428077 at   | -2.30 | 0.00 |
| <i>Lpin1</i>                            | lipin 1                                                                                                                                                                                                                     | 1426516 a at | -2.30 | 0.00 |
| ---                                     | ---                                                                                                                                                                                                                         | 1435194 at   | -2.30 | 0.00 |
| <i>Gata4</i>                            | GATA binding protein 4                                                                                                                                                                                                      | 1441364 at   | -2.30 | 0.00 |
| <i>Fabp7</i>                            | fatty acid binding protein 7, brain                                                                                                                                                                                         | 1450779 at   | -2.30 | 0.00 |
| <i>B3galt2</i>                          | UDP-Gal:betaGlcNAc beta 1,3-galactosyltransferase, polypeptide 2                                                                                                                                                            | 1423084 at   | -2.30 | 0.00 |
| <i>2310061C15Rik</i>                    | RIKEN cDNA 2310061C15 gene                                                                                                                                                                                                  | 1427921 s at | -2.30 | 0.00 |
| <i>Ccnh</i>                             | cyclin H                                                                                                                                                                                                                    | 1418585 at   | -2.31 | 0.00 |
| <i>Kcnd2</i>                            | potassium voltage-gated channel, Shal-related family, member 2                                                                                                                                                              | 1422835 at   | -2.31 | 0.00 |
| <i>Auts2</i>                            | autism susceptibility candidate 2                                                                                                                                                                                           | 1457139 at   | -2.31 | 0.00 |
| <i>Fndc5</i>                            | fibronectin type III domain containing 5                                                                                                                                                                                    | 1435115 at   | -2.31 | 0.00 |

|                            |                                                                                                                                   |              |       |      |
|----------------------------|-----------------------------------------------------------------------------------------------------------------------------------|--------------|-------|------|
| <i>Eif4e</i> /// LOC630527 | eukaryotic translation initiation factor 4E /// hypothetical LOC630527                                                            | 1423220 at   | -2.31 | 0.00 |
| ---                        | ---                                                                                                                               | 1458847 at   | -2.31 | 0.00 |
| <i>AW548124</i>            | expressed sequence AW548124                                                                                                       | 1460411 s at | -2.31 | 0.00 |
| <i>Cd83</i>                | CD83 antigen                                                                                                                      | 1416111 at   | -2.32 | 0.00 |
| <i>Col8a1</i>              | procollagen, type VIII, alpha 1                                                                                                   | 1418440 at   | -2.32 | 0.00 |
| <i>BB164513</i>            | Expressed sequence BB164513                                                                                                       | 1439397 at   | -2.32 | 0.00 |
| ---                        | ---                                                                                                                               | 1458341 x at | -2.32 | 0.00 |
| <i>Upk3b</i>               | uroplakin 3B                                                                                                                      | 1434237 at   | -2.32 | 0.00 |
| <i>Dnajb14</i>             | Dnaj (Hsp40) homolog, subfamily B, member 14                                                                                      | 1430561 at   | -2.33 | 0.00 |
| <i>Rasgrp3</i>             | RAS, guanyl releasing protein 3                                                                                                   | 1438030 at   | -2.33 | 0.00 |
| <i>Hevl</i>                | hairy/enhancer-of-split related with YRPW motif-like                                                                              | 1419302 at   | -2.33 | 0.00 |
| <i>Tmem65</i>              | transmembrane protein 65                                                                                                          | 1452942 at   | -2.33 | 0.00 |
| <i>G0s2</i>                | G0/G1 switch gene 2                                                                                                               | 1448700 at   | -2.33 | 0.00 |
| <i>Emilin2</i>             | elastin microfibril interfacier 2                                                                                                 | 1435264 at   | -2.33 | 0.00 |
| <i>A1956758</i>            | expressed sequence A1956758                                                                                                       | 1460003 at   | -2.33 | 0.00 |
| <i>Dnmt3a</i>              | DNA methyltransferase 3A                                                                                                          | 1423063 at   | -2.33 | 0.00 |
| <i>Mitf</i>                | microphthalmia-associated transcription factor                                                                                    | 1422025 at   | -2.33 | 0.00 |
| <i>Prkaa2</i>              | protein kinase, AMP-activated, alpha 2 catalytic subunit                                                                          | 1429464 at   | -2.34 | 0.00 |
| <i>Colec12</i>             | collectin sub-family member 12                                                                                                    | 1419693 at   | -2.34 | 0.00 |
| <i>Ckb</i>                 | creatine kinase, brain                                                                                                            | 1455106 a at | -2.34 | 0.00 |
| <i>1110021L09Rik</i>       | RIKEN cDNA 1110021L09 gene                                                                                                        | 1428795 at   | -2.34 | 0.00 |
| <i>Ppp1r3c</i>             | protein phosphatase 1, regulatory (inhibitor) subunit 3C                                                                          | 1433691 at   | -2.34 | 0.00 |
| <i>Thbs2</i>               | thrombospondin 2                                                                                                                  | 1450663 at   | -2.34 | 0.00 |
| <i>Alkbh7</i>              | alkB, alkylation repair homolog 7 (E. coli)                                                                                       | 1428516 a at | -2.35 | 0.00 |
| <i>Ces3</i>                | carboxylesterase 3                                                                                                                | 1435370 a at | -2.35 | 0.00 |
| <i>Rpa3</i>                | replication protein A3                                                                                                            | 1448938 at   | -2.35 | 0.00 |
| <i>Mycn</i>                | v-myc myelocytomatosis viral related oncogene, neuroblastoma derived (avian)                                                      | 1417155 at   | -2.35 | 0.00 |
| <i>A130092J06Rik</i>       | RIKEN cDNA A130092J06 gene                                                                                                        | 1433657 at   | -2.35 | 0.00 |
| <i>Ppargc1a</i>            | Peroxisome proliferative activated receptor, gamma, coactivator 1 alpha                                                           | 1434100 x at | -2.36 | 0.00 |
| ---                        | ---                                                                                                                               | 1436219 at   | -2.36 | 0.00 |
| <i>BF642829</i>            | expressed sequence BF642829                                                                                                       | 1440227 at   | -2.36 | 0.00 |
| <i>Lynx1</i>               | Ly6/neurotoxin 1                                                                                                                  | 1417283 at   | -2.36 | 0.00 |
| <i>Rgs2</i>                | regulator of G-protein signaling 2                                                                                                | 1447830 s at | -2.36 | 0.00 |
| <i>Postn</i>               | periostin, osteoblast specific factor                                                                                             | 1423606 at   | -2.36 | 0.00 |
| <i>Per3</i>                | period homolog 3 (Drosophila)                                                                                                     | 1421087 at   | -2.37 | 0.00 |
| <i>Syde2</i> /// LOC639654 | synapse defective 1, Rho GTPase, homolog 2 (C. elegans) /// similar to synapse defective 1, Rho GTPase, homolog 1                 | 1437424_at   | -2.37 | 0.00 |
| <i>Ddit4l</i>              | DNA-damage-inducible transcript 4-like                                                                                            | 1444139 at   | -2.37 | 0.00 |
| <i>Lims1</i>               | LIM and senescent cell antigen-like domains 1                                                                                     | 1418230 a at | -2.37 | 0.00 |
| <i>Sipa1l2</i>             | signal-induced proliferation-associated 1 like 2                                                                                  | 1434261 at   | -2.37 | 0.00 |
| <i>Car3</i>                | carbonic anhydrase 3                                                                                                              | 1453588 at   | -2.37 | 0.00 |
| <i>P2ry1</i>               | purinergic receptor P2Y, G-protein coupled 1                                                                                      | 1421456 at   | -2.38 | 0.00 |
| <i>Ddef1</i>               | Development and differentiation enhancing                                                                                         | 1438301 at   | -2.38 | 0.00 |
| <i>Timp2</i>               | tissue inhibitor of metalloproteinase 2                                                                                           | 1420924 at   | -2.38 | 0.00 |
| ---                        | Adult male aorta and vein cDNA, RIKEN full-length enriched library, clone:A530095B21 product:unclassifiable, full insert sequence | 1457883_at   | -2.38 | 0.00 |
| <i>Ces3</i>                | carboxylesterase 3                                                                                                                | 1449081 at   | -2.38 | 0.00 |
| <i>Ppargc1a</i>            | Peroxisome proliferative activated receptor, gamma, coactivator 1 alpha                                                           | 1434099 at   | -2.38 | 0.00 |
| <i>Plscr4</i>              | phospholipid scramblase 4                                                                                                         | 1433626 at   | -2.38 | 0.00 |
| <i>Mpped2</i>              | metallophosphoesterase domain containing 2                                                                                        | 1431751 a at | -2.38 | 0.00 |
| <i>LOC672274</i>           | similar to Transcription factor SOX-4                                                                                             | 1433575 at   | -2.38 | 0.00 |
| <i>Ppig</i>                | peptidyl-prolyl isomerase G (cyclophilin G)                                                                                       | 1434475 at   | -2.38 | 0.00 |
| <i>Prickle1</i>            | prickle like 1 (Drosophila)                                                                                                       | 1452249 at   | -2.38 | 0.00 |
| <i>Naalad2</i>             | N-acetylated alpha-linked acidic dipeptidase 2                                                                                    | 1422671 s at | -2.39 | 0.00 |
| <i>Meox2</i>               | mesenchyme homeobox 2                                                                                                             | 1424234 s at | -2.39 | 0.00 |
| <i>Npr3</i>                | natriuretic peptide receptor 3                                                                                                    | 1448024 at   | -2.39 | 0.00 |
| <i>Pde7a</i>               | phosphodiesterase 7A                                                                                                              | 1458218 s at | -2.39 | 0.00 |
| <i>B430119L13Rik</i>       | RIKEN cDNA B430119L13 gene                                                                                                        | 1435648 at   | -2.39 | 0.00 |
| <i>B230343J05Rik</i>       | RIKEN cDNA B230343J05 gene                                                                                                        | 1436432 at   | -2.40 | 0.00 |
| <i>Colec11</i>             | collectin sub-family member 11                                                                                                    | 1429179 at   | -2.40 | 0.00 |
| <i>Gmps</i>                | guanine monophosphate synthetase                                                                                                  | 1455057 at   | -2.40 | 0.00 |
| <i>Siah2</i>               | seven in absentia 2                                                                                                               | 1448170 at   | -2.40 | 0.00 |
| <i>Kcna1</i>               | potassium voltage-gated channel, shaker-related subfamily, member 1                                                               | 1437230 at   | -2.40 | 0.00 |
| <i>Timp2</i>               | tissue inhibitor of metalloproteinase 2                                                                                           | 1433662 s at | -2.40 | 0.00 |
| <i>Klf12</i>               | Kruppel-like factor 12                                                                                                            | 1439847 s at | -2.41 | 0.00 |
| <i>AW548124</i>            | expressed sequence AW548124                                                                                                       | 1454838 s at | -2.41 | 0.00 |
| <i>Stk23</i>               | serine/threonine kinase 23                                                                                                        | 1447806 s at | -2.41 | 0.00 |
| <i>Nope</i>                | neighbor of Punc E11                                                                                                              | 1416474 at   | -2.41 | 0.00 |
| <i>Srpk2</i>               | serine/arginine-rich protein specific kinase 2                                                                                    | 1417135 at   | -2.42 | 0.00 |
| <i>Vegfc</i>               | vascular endothelial growth factor C                                                                                              | 1440739 at   | -2.42 | 0.00 |
| <i>Garn14</i>              | GTPase activating RANGAP domain-like 4                                                                                            | 1434754 at   | -2.42 | 0.00 |
| <i>Slc25a29</i>            | solute carrier family 25 (mitochondrial carrier, palmitoylecarnitine transporter), member 29                                      | 1438188_x_at | -2.42 | 0.00 |
| <i>C130009A20Rik</i>       | RIKEN cDNA C130009A20 gene                                                                                                        | 1447623 s at | -2.42 | 0.00 |
| <i>Csrp2</i>               | cysteine and glycine-rich protein 2                                                                                               | 1420731 a at | -2.42 | 0.00 |
| <i>C730029A08Rik</i>       | RIKEN cDNA C730029A08 gene                                                                                                        | 1436168 at   | -2.42 | 0.00 |
| <i>Pla2g5</i>              | phospholipase A2, group V                                                                                                         | 1417814 at   | -2.43 | 0.00 |
| <i>Cpxm2</i>               | carboxypeptidase X 2 (M14 family)                                                                                                 | 1460248 at   | -2.43 | 0.00 |
| <i>Pnkd</i>                | paroxysmal nonkinesinogenic dyskinesia                                                                                            | 1418746 at   | -2.43 | 0.00 |
| <i>Bdh1</i>                | 3-hydroxybutyrate dehydrogenase, type 1                                                                                           | 1426959 at   | -2.43 | 0.00 |
| <i>Fkbp4</i>               | FK506 binding protein 4                                                                                                           | 1416362 a at | -2.43 | 0.00 |
| <i>Hrasls</i>              | HRAS-like suppressor                                                                                                              | 1428991 at   | -2.44 | 0.00 |
| ---                        | ---                                                                                                                               | 1442473 at   | -2.44 | 0.00 |
| <i>6330509G02Rik</i>       | RIKEN cDNA 6330509G02 gene                                                                                                        | 1434535 at   | -2.44 | 0.00 |
| <i>Jam2</i>                | junction adhesion molecule 2                                                                                                      | 1436568 at   | -2.44 | 0.00 |
| <i>2310010M20Rik</i>       | RIKEN cDNA 2310010M20 gene                                                                                                        | 1432107 at   | -2.44 | 0.00 |
| <i>Gja3</i>                | gap junction membrane channel protein alpha 3                                                                                     | 1439793 at   | -2.45 | 0.00 |
| <i>Srpk2</i>               | serine/arginine-rich protein specific kinase 2                                                                                    | 1435746 at   | -2.45 | 0.00 |
| <i>D330017J20Rik</i>       | RIKEN cDNA D330017J20 gene                                                                                                        | 1433847 at   | -2.45 | 0.00 |
| <i>A730046J16</i>          | hypothetical protein A730046J16                                                                                                   | 1433939 at   | -2.45 | 0.00 |
| <i>Car8</i> /// LOC676792  | carbonic anhydrase 8 /// similar to Carbonic anhydrase-related protein (CARP) (CA-VIII)                                           | 1427482 a at | -2.45 | 0.00 |
| <i>Fap</i>                 | fibroblast activation protein                                                                                                     | 1417552 at   | -2.46 | 0.00 |
| <i>Pkia</i>                | protein kinase inhibitor, alpha                                                                                                   | 1420859 at   | -2.46 | 0.00 |
| <i>Car14</i>               | carbonic anhydrase 14                                                                                                             | 1450725 s at | -2.46 | 0.00 |
| <i>Tnni3k</i>              | TNNI3 interacting kinase                                                                                                          | 1458482 at   | -2.47 | 0.00 |
| <i>Hccs</i>                | holocytochrome c synthetase                                                                                                       | 1420890 at   | -2.47 | 0.00 |
| <i>B330003H21</i>          | hypothetical protein B330003H21                                                                                                   | 1441139 at   | -2.47 | 0.00 |

|                                    |                                                                                                                                                                               |              |       |      |
|------------------------------------|-------------------------------------------------------------------------------------------------------------------------------------------------------------------------------|--------------|-------|------|
| <i>Mgp</i>                         | matrix Gla protein                                                                                                                                                            | 1448416 at   | -2.47 | 0.00 |
| <i>Ppp1r14c</i>                    | protein phosphatase 1, regulatory (inhibitor) subunit 14c                                                                                                                     | 1417701 at   | -2.47 | 0.00 |
| <i>Smtn</i>                        | smoothelin                                                                                                                                                                    | 1452469 a at | -2.47 | 0.00 |
| <i>D130058I21Rik</i>               | RIKEN cDNA D130058I21 gene                                                                                                                                                    | 1455794 at   | -2.47 | 0.00 |
| <i>Homer2</i>                      | homer homolog 2 (Drosophila)                                                                                                                                                  | 1424367 a at | -2.47 | 0.00 |
| <i>Reck</i>                        | reversion-inducing-cysteine-rich protein with kazal motifs                                                                                                                    | 1450784 at   | -2.47 | 0.00 |
| <i>Per3</i>                        | Period homolog 3 (Drosophila)                                                                                                                                                 | 1458176 at   | -2.47 | 0.00 |
| <i>Hdhd3</i>                       | haloacid dehalogenase-like hydrolase domain containing 3                                                                                                                      | 1425343 at   | -2.48 | 0.00 |
| <i>Gucy1b3</i>                     | guanylate cyclase 1, soluble, beta 3                                                                                                                                          | 1420872 at   | -2.48 | 0.00 |
| <i>Ddit3</i>                       | DNA-damage inducible transcript 3                                                                                                                                             | 1443897 at   | -2.48 | 0.00 |
| <i>Spsb4</i>                       | splA/ryanodine receptor domain and SOCS box containing 4                                                                                                                      | 1451418 a at | -2.48 | 0.00 |
| <i>Fbxw7</i>                       | F-box and WD-40 domain protein 7, archipelago homolog (Drosophila)                                                                                                            | 1424986 s at | -2.48 | 0.00 |
| <i>Frmad6</i>                      | FERM domain containing 6                                                                                                                                                      | 1457184 at   | -2.49 | 0.00 |
| <i>A1452195</i>                    | expressed sequence A1452195                                                                                                                                                   | 1435280 at   | -2.49 | 0.00 |
| <i>Eno3</i>                        | Enolase 3, beta muscle                                                                                                                                                        | 1449631 at   | -2.49 | 0.00 |
| <i>Hlf</i>                         | hepatic leukemia factor                                                                                                                                                       | 1434735 at   | -2.49 | 0.00 |
| <i>Mef2c</i>                       | myocyte enhancer factor 2C                                                                                                                                                    | 1421027 a at | -2.49 | 0.00 |
| <i>Till1</i>                       | tubulin tyrosine ligase-like 1                                                                                                                                                | 1426427 at   | -2.50 | 0.00 |
| <i>Dynll2</i>                      | dynein light chain LC8-type 2                                                                                                                                                 | 1418258 s at | -2.50 | 0.00 |
| <i>Prkaa2</i>                      | protein kinase, AMP-activated, alpha 2 catalytic subunit                                                                                                                      | 1429463 at   | -2.50 | 0.00 |
| <i>A930038C07Rik</i>               | RIKEN cDNA A930038C07 gene                                                                                                                                                    | 1460465 at   | -2.51 | 0.00 |
| <i>Mbp</i>                         | myelin basic protein                                                                                                                                                          | 1456228 x at | -2.51 | 0.00 |
| <i>Angptl2</i>                     | angiopoietin-like 2                                                                                                                                                           | 1421002 at   | -2.51 | 0.00 |
| <i>Tspan2</i>                      | tetraspanin 2                                                                                                                                                                 | 1424568 at   | -2.52 | 0.00 |
| <i>Asb15</i>                       | ankyrin repeat and SOCS box-containing protein 15                                                                                                                             | 1439836 at   | -2.52 | 0.00 |
| <i>Gpc6</i>                        | glypican 6                                                                                                                                                                    | 1419688 at   | -2.52 | 0.00 |
| <i>1700020I14Rik</i>               | RIKEN cDNA 1700020I14 gene                                                                                                                                                    | 1437774 at   | -2.52 | 0.00 |
| ---                                | Transcribed locus                                                                                                                                                             | 1444307 at   | -2.53 | 0.00 |
| <i>Fgf9</i>                        | fibroblast growth factor 9                                                                                                                                                    | 1438718 at   | -2.53 | 0.00 |
| <i>Fat4</i>                        | FAT tumor suppressor homolog 4 (Drosophila)                                                                                                                                   | 1460574 at   | -2.53 | 0.00 |
| <i>Fgf16</i>                       | fibroblast growth factor 16                                                                                                                                                   | 1420806 at   | -2.53 | 0.00 |
| <i>493043IH11Rik</i>               | RIKEN cDNA 493043IH11 gene                                                                                                                                                    | 1439484 at   | -2.53 | 0.00 |
| <i>Dnmt3a</i>                      | DNA methyltransferase 3A                                                                                                                                                      | 1460324 at   | -2.53 | 0.00 |
| <i>Ccdc69</i>                      | coiled-coil domain containing 69                                                                                                                                              | 1419985 s at | -2.53 | 0.00 |
| <i>Ank1</i>                        | ankyrin 1, erythroid                                                                                                                                                          | 1425677 a at | -2.53 | 0.00 |
| <i>2510006C20Rik</i>               | RIKEN cDNA 2510006C20 gene                                                                                                                                                    | 1419074 at   | -2.54 | 0.00 |
| <i>2610528E23Rik</i>               | RIKEN cDNA 2610528E23 gene                                                                                                                                                    | 1428519 at   | -2.54 | 0.00 |
| <i>Opct /// LOC639942</i>          | glutaminy-peptide cyclotransferase (glutaminy cyclase) /// similar to Glutaminy-peptide cyclotransferase precursor (QC) (Glutaminy-tRNA cyclotransferase) (Glutaminy cyclase) | 1426622_a at | -2.54 | 0.00 |
| <i>Kif13a</i>                      | kinesin family member 13A                                                                                                                                                     | 1439532 s at | -2.54 | 0.00 |
| <i>C730029A08Rik</i>               | RIKEN cDNA C730029A08 gene                                                                                                                                                    | 1436169 at   | -2.55 | 0.00 |
| <i>Rbp1</i>                        | retinol binding protein 1, cellular                                                                                                                                           | 1448754 at   | -2.55 | 0.00 |
| <i>Dpf3</i>                        | D4, zinc and double PHD fingers, family 3                                                                                                                                     | 1442686 at   | -2.56 | 0.00 |
| <i>Scn7a</i>                       | sodium channel, voltage-gated, type VII, alpha                                                                                                                                | 1436044 at   | -2.56 | 0.00 |
| <i>Plxnb1</i>                      | plexin B1                                                                                                                                                                     | 1435254 at   | -2.56 | 0.00 |
| <i>Ank</i>                         | progressive ankylosis                                                                                                                                                         | 1450627 at   | -2.56 | 0.00 |
| <i>Fgd4</i>                        | FYVE, RhoGEF and PH domain containing 4                                                                                                                                       | 1455337 at   | -2.56 | 0.00 |
| <i>A930008G19Rik</i>               | RIKEN cDNA A930008G19 gene                                                                                                                                                    | 1447176 at   | -2.56 | 0.00 |
| <i>Gucy1b3</i>                     | guanylate cyclase 1, soluble, beta 3                                                                                                                                          | 1420871 at   | -2.57 | 0.00 |
| <i>Ak311</i>                       | adenylate kinase 3 alpha-like 1                                                                                                                                               | 1421830 at   | -2.57 | 0.00 |
| <i>1700040L02Rik</i>               | RIKEN cDNA 1700040L02 gene                                                                                                                                                    | 1428812 at   | -2.58 | 0.00 |
| <i>6720475J19Rik /// LOC670480</i> | RIKEN cDNA 6720475J19 gene /// similar to putative retrovirus-related gag protein                                                                                             | 1423072 at   | -2.58 | 0.00 |
| <i>D330050I23Rik</i>               | RIKEN cDNA D330050I23 gene                                                                                                                                                    | 1434301 at   | -2.58 | 0.00 |
| <i>Pltp</i>                        | phospholipid transfer protein                                                                                                                                                 | 1417963 at   | -2.59 | 0.00 |
| <i>Gucy1a3</i>                     | guanylate cyclase 1, soluble, alpha 3                                                                                                                                         | 1420534 at   | -2.59 | 0.00 |
| <i>Ntf3</i>                        | neurotrophin 3                                                                                                                                                                | 1434802 s at | -2.59 | 0.00 |
| <i>Cav2</i>                        | caveolin 2                                                                                                                                                                    | 1417327 at   | -2.60 | 0.00 |
| <i>Gucy1a3</i>                     | guanylate cyclase 1, soluble, alpha 3                                                                                                                                         | 1434141 at   | -2.60 | 0.00 |
| <i>Prickle1</i>                    | Prickle like 1 (Drosophila)                                                                                                                                                   | 1457637 at   | -2.60 | 0.00 |
| <i>Rassf3</i>                      | Ras association (RalGDS/AF-6) domain family 3                                                                                                                                 | 1448547 at   | -2.60 | 0.00 |
| <i>5730410E15Rik</i>               | RIKEN cDNA 5730410E15 gene                                                                                                                                                    | 1447609 at   | -2.60 | 0.00 |
| <i>2610301F02Rik</i>               | RIKEN cDNA 2610301F02 gene                                                                                                                                                    | 1457681 at   | -2.60 | 0.00 |
| <i>Aadacl1</i>                     | arylacacetamide deacetylase-like 1                                                                                                                                            | 1435135 at   | -2.61 | 0.00 |
| <i>Aqp1</i>                        | aquaporin 1                                                                                                                                                                   | 1416203 at   | -2.61 | 0.00 |
| <i>Ok</i>                          | quaking                                                                                                                                                                       | 1417073 a at | -2.61 | 0.00 |
| <i>Kitl</i>                        | Kit ligand                                                                                                                                                                    | 1440621 at   | -2.61 | 0.00 |
| <i>Gulp1</i>                       | GULP, engulfment adaptor PTB domain containing 1                                                                                                                              | 1453771 at   | -2.61 | 0.00 |
| ---                                | ---                                                                                                                                                                           | 1455090 at   | -2.61 | 0.00 |
| <i>Tmem45b</i>                     | transmembrane protein 45b                                                                                                                                                     | 1424357 at   | -2.61 | 0.00 |
| <i>9430047G12Rik</i>               | RIKEN cDNA 9430047G12 gene                                                                                                                                                    | 1458892 at   | -2.62 | 0.00 |
| <i>Myct1</i>                       | myc target 1                                                                                                                                                                  | 1438048 at   | -2.62 | 0.00 |
| <i>9330120H11Rik</i>               | RIKEN cDNA 9330120H11 gene                                                                                                                                                    | 1457671 at   | -2.62 | 0.00 |
| <i>Mef2c</i>                       | Myocyte enhancer factor 2C                                                                                                                                                    | 1439946 at   | -2.63 | 0.00 |
| <i>Rassf3</i>                      | Ras association (RalGDS/AF-6) domain family 3                                                                                                                                 | 1448546 at   | -2.63 | 0.00 |
| <i>Dpt</i>                         | dermatopontin                                                                                                                                                                 | 1418511 at   | -2.63 | 0.00 |
| <i>Igf1</i>                        | insulin-like growth factor 1                                                                                                                                                  | 1419519 at   | -2.63 | 0.00 |
| <i>Col15a1</i>                     | procollagen, type XV                                                                                                                                                          | 1448755 at   | -2.63 | 0.00 |
| <i>9630010G10Rik</i>               | RIKEN cDNA 9630010G10 gene                                                                                                                                                    | 1460121 at   | -2.64 | 0.00 |
| <i>Thbs2</i>                       | thrombospondin 2                                                                                                                                                              | 1422571 at   | -2.65 | 0.00 |
| <i>Kitl</i>                        | kit ligand                                                                                                                                                                    | 1448117 at   | -2.65 | 0.00 |
| ---                                | PREDICTED: Mus musculus hypothetical protein LOC628151 (LOC628151), mRNA                                                                                                      | 1445764 at   | -2.65 | 0.00 |
| <i>A930004K21Rik</i>               | RIKEN cDNA A930004K21 gene                                                                                                                                                    | 1436243 at   | -2.65 | 0.00 |
| <i>Cdc14b</i>                      | CDC14 cell division cycle 14 homolog B (S. cerevisiae)                                                                                                                        | 1429418 at   | -2.66 | 0.00 |
| <i>Pdlim4</i>                      | PDZ and LIM domain 4                                                                                                                                                          | 1417928 at   | -2.66 | 0.00 |
| <i>Cttnm8</i>                      | CKLF-like MARVEL transmembrane domain containing 8                                                                                                                            | 1427964 at   | -2.66 | 0.00 |
| <i>D330010C22Rik</i>               | RIKEN cDNA 330010C22 gene                                                                                                                                                     | 1436277 at   | -2.66 | 0.00 |
| <i>Pah</i>                         | phenylalanine hydroxylase                                                                                                                                                     | 1454638 a at | -2.66 | 0.00 |
| <i>Adcy7</i>                       | adenylate cyclase 7                                                                                                                                                           | 1456307 s at | -2.67 | 0.00 |
| <i>6330505F04Rik</i>               | RIKEN cDNA 6330505F04 gene                                                                                                                                                    | 1438496 a at | -2.67 | 0.00 |
| <i>Pltp</i>                        | phospholipid transfer protein                                                                                                                                                 | 1456424 s at | -2.67 | 0.00 |
| <i>Vsig4</i>                       | V-set and immunoglobulin domain containing 4                                                                                                                                  | 1451651 at   | -2.67 | 0.00 |
| <i>Meox2</i>                       | mesenchyme homeobox 2                                                                                                                                                         | 1424233 at   | -2.67 | 0.00 |
| <i>Slc6a6</i>                      | solute carrier family 6 (neurotransmitter transporter, taurine), member 6                                                                                                     | 1437149 at   | -2.68 | 0.00 |
| <i>Kif1b</i>                       | kinesin family member 1B                                                                                                                                                      | 1425270 at   | -2.68 | 0.00 |
| <i>A1317395</i>                    | expressed sequence A1317395                                                                                                                                                   | 1436109 at   | -2.69 | 0.00 |
| <i>Matn2</i>                       | matrilin 2                                                                                                                                                                    | 1419442 at   | -2.69 | 0.00 |

|                                              |                                                                                                                                 |              |       |      |
|----------------------------------------------|---------------------------------------------------------------------------------------------------------------------------------|--------------|-------|------|
| <i>Manba</i>                                 | mannosidase, beta A, lysosomal                                                                                                  | 1450626 at   | -2.69 | 0.00 |
| <i>Slc8a1</i>                                | Solute carrier family 8 (sodium/calcium exchanger), member 1                                                                    | 1447231 at   | -2.69 | 0.00 |
| <i>Epha4</i>                                 | Eph receptor A4                                                                                                                 | 1421928 at   | -2.69 | 0.00 |
| <i>Prkar2b</i>                               | protein kinase, cAMP dependent regulatory, type II beta                                                                         | 1438664 at   | -2.69 | 0.00 |
| <i>1110032E23Rik</i>                         | RIKEN cDNA 1110032E23 gene                                                                                                      | 1416805 at   | -2.70 | 0.00 |
| <i>Vin</i>                                   | vitronectin                                                                                                                     | 1420484 a at | -2.70 | 0.00 |
| <i>Tcf15</i>                                 | transcription factor 15                                                                                                         | 1449592 at   | -2.70 | 0.00 |
| <i>AI314604</i>                              | expressed sequence AI314604                                                                                                     | 1442075 at   | -2.70 | 0.00 |
| <i>Nhs1</i>                                  | NHS-like 1                                                                                                                      | 1426934 at   | -2.70 | 0.00 |
| <i>Npr3</i>                                  | natriuretic peptide receptor 3                                                                                                  | 1435184 at   | -2.71 | 0.00 |
| <i>Enpp3</i>                                 | ectonucleotide pyrophosphatase/phosphodiesterase 3                                                                              | 1439260 a at | -2.71 | 0.00 |
| <i>Comp</i>                                  | cartilage oligomeric matrix protein                                                                                             | 1419527 at   | -2.72 | 0.00 |
| <i>Fhl2</i>                                  | four and a half LIM domains 2                                                                                                   | 1419184 a at | -2.72 | 0.00 |
| <i>Eif4e</i>                                 | eukaryotic translation initiation factor 4E                                                                                     | 1450909 at   | -2.73 | 0.00 |
| ---                                          | ---                                                                                                                             | 1455374 at   | -2.73 | 0.00 |
| <i>BC026657</i>                              | cDNA sequence BC026657                                                                                                          | 1426880 at   | -2.74 | 0.00 |
| <i>Pfkfb2</i>                                | 6-phosphofructo-2-kinase/fructose-2,6-biphosphatase 2                                                                           | 1429486 at   | -2.75 | 0.00 |
| <i>Pkd2l2</i>                                | polycystic kidney disease 2-like 2                                                                                              | 1449469 at   | -2.75 | 0.00 |
| <i>Mamdc2</i>                                | MAM domain containing 2                                                                                                         | 1453152 at   | -2.76 | 0.00 |
| <i>Tpm2</i>                                  | tropomyosin 2, beta                                                                                                             | 1425028 a at | -2.76 | 0.00 |
| <i>Pitpnc1</i>                               | phosphatidylinositol transfer protein, cytoplasmic 1                                                                            | 1455204 at   | -2.76 | 0.00 |
| <i>Kcnd2</i>                                 | Potassium voltage-gated channel, Shal-related family, member 2                                                                  | 1459288 at   | -2.76 | 0.00 |
| <i>Lpin1</i>                                 | lipin 1                                                                                                                         | 1418288 at   | -2.78 | 0.00 |
| <i>ApoE</i>                                  | apolipoprotein E                                                                                                                | 1432466 a at | -2.78 | 0.00 |
| <i>Ppargc1b</i>                              | peroxisome proliferative activated receptor, gamma, coactivator 1 beta                                                          | 1449945 at   | -2.78 | 0.00 |
| <i>Zfp606</i>                                | zinc finger protein 606                                                                                                         | 1454951 at   | -2.79 | 0.00 |
| <i>Scn7a</i>                                 | sodium channel, voltage-gated, type VII, alpha                                                                                  | 1436043 at   | -2.79 | 0.00 |
| <i>Itm2a</i>                                 | integral membrane protein 2A                                                                                                    | 1451047 at   | -2.79 | 0.00 |
| <i>Asb2</i>                                  | ankyrin repeat and SOCS box-containing protein 2                                                                                | 1428444 at   | -2.79 | 0.00 |
| <i>1190002N15Rik</i>                         | RIKEN cDNA 1190002N15 gene                                                                                                      | 1433582 at   | -2.80 | 0.00 |
| <i>Asb10</i>                                 | ankyrin repeat and SOCS box-containing protein 10                                                                               | 1441581 at   | -2.80 | 0.00 |
| <i>Ldhh</i>                                  | Lactate dehydrogenase B                                                                                                         | 1442618 at   | -2.80 | 0.00 |
| <i>Kcnd2</i>                                 | Potassium voltage-gated channel, Shal-related family, member 2                                                                  | 1446065 at   | -2.81 | 0.00 |
| <i>1810012P15Rik</i>                         | RIKEN cDNA 1810012P15 gene                                                                                                      | 1436548 at   | -2.81 | 0.00 |
| <i>Obscn</i>                                 | obscurin, cytoskeletal calmodulin and titin-interacting RhoGEF                                                                  | 1443632 at   | -2.81 | 0.00 |
| <i>2610301F02Rik</i>                         | RIKEN cDNA 2610301F02 gene                                                                                                      | 1429946 at   | -2.82 | 0.00 |
| <i>Camk1d</i>                                | calcium/calmodulin-dependent protein kinase ID                                                                                  | 1452050 at   | -2.82 | 0.00 |
| <i>Ky</i>                                    | kypsochloisis peptidase                                                                                                         | 1440435 at   | -2.82 | 0.00 |
| <i>A530058N18Rik</i>                         | RIKEN cDNA A530058N18 gene                                                                                                      | 1443470 at   | -2.82 | 0.00 |
| <i>Fbxw7</i>                                 | F-box and WD-40 domain protein 7, archipelago homolog (Drosophila)                                                              | 1451558 at   | -2.83 | 0.00 |
| <i>BB144871</i>                              | expressed sequence BB144871                                                                                                     | 1436453 at   | -2.83 | 0.00 |
| <i>1500015O10Rik</i>                         | RIKEN cDNA 1500015O10 gene                                                                                                      | 1460049 s at | -2.83 | 0.00 |
| <i>Plxdc2</i>                                | plexin domain containing 2                                                                                                      | 1449270 at   | -2.83 | 0.00 |
| <i>Runx1t1</i>                               | runt-related transcription factor 1; translocated to, 1 (cyclin D-related)                                                      | 1427640 a at | -2.83 | 0.00 |
| <i>2900041A09Rik</i>                         | RIKEN cDNA 2900041A09 gene                                                                                                      | 1452766 at   | -2.83 | 0.00 |
| ---                                          | 16 days neonate heart cDNA, RIKEN full-length enriched library, clone:D830044D09 product:unclassifiable, full insert sequence   | 1442304_at   | -2.83 | 0.00 |
| <i>Arhgap18</i>                              | Rho GTPase activating protein 18                                                                                                | 1426952 at   | -2.83 | 0.00 |
| <i>Esrrg</i>                                 | estrogen-related receptor gamma                                                                                                 | 1457896 at   | -2.83 | 0.00 |
| <i>1810012P15Rik</i>                         | RIKEN cDNA 1810012P15 gene                                                                                                      | 1440234 at   | -2.84 | 0.00 |
| ---                                          | Transcribed locus                                                                                                               | 1445574 at   | -2.84 | 0.00 |
| <i>Pde7a</i>                                 | phosphodiesterase 7A                                                                                                            | 1451839 a at | -2.85 | 0.00 |
| <i>Pcdh12</i>                                | protocadherin 12                                                                                                                | 1437928 at   | -2.85 | 0.00 |
| <i>LOC380843 /// LOC638266 /// LOC666794</i> | similar to RNA binding motif protein 24 /// similar to RNA binding motif protein 24 /// similar to RNA binding motif protein 24 | 1443715_at   | -2.85 | 0.00 |
| <i>6030442H21Rik</i>                         | RIKEN cDNA 6030442H21 gene                                                                                                      | 1432746 at   | -2.86 | 0.00 |
| ---                                          | PREDICTED: Mus musculus similar to HYPOTHETICAL PROTEIN ORF-1137 (LOC626631), mRNA                                              | 1446524_at   | -2.86 | 0.00 |
| <i>Nov</i>                                   | nephroblastoma overexpressed gene                                                                                               | 1426851 a at | -2.88 | 0.00 |
| <i>Snai2</i>                                 | snail homolog 2 (Drosophila)                                                                                                    | 1447643 x at | -2.88 | 0.00 |
| <i>Lrrc17</i>                                | leucine rich repeat containing 17                                                                                               | 1429679 at   | -2.89 | 0.00 |
| <i>Vegfa</i>                                 | vascular endothelial growth factor A                                                                                            | 1420909 at   | -2.90 | 0.00 |
| <i>4631423F02Rik</i>                         | RIKEN cDNA 4631423F02 gene                                                                                                      | 1452707 at   | -2.90 | 0.00 |
| <i>Iqgap2</i>                                | IQ motif containing GTPase activating protein 2                                                                                 | 1433885 at   | -2.90 | 0.00 |
| <i>Igfbp5</i>                                | insulin-like growth factor binding protein 5                                                                                    | 1452114 s at | -2.91 | 0.00 |
| <i>Ung</i>                                   | uracil DNA glycosylase                                                                                                          | 1425753 s at | -2.92 | 0.00 |
| <i>Lepr</i>                                  | leptin receptor                                                                                                                 | 1456156 at   | -2.92 | 0.00 |
| <i>Lepr</i>                                  | leptin receptor                                                                                                                 | 1425644 at   | -2.92 | 0.00 |
| <i>Col4a4</i>                                | procollagen, type IV, alpha 4                                                                                                   | 1445328 at   | -2.93 | 0.00 |
| <i>Paqr9</i>                                 | progesterin and adipoQ receptor family member IX                                                                                | 1455025 at   | -2.93 | 0.00 |
| <i>Pank1</i>                                 | pantothenate kinase 1                                                                                                           | 1457110 at   | -2.93 | 0.00 |
| <i>Kcnk3</i>                                 | potassium channel, subfamily K, member 3                                                                                        | 1425341 at   | -2.94 | 0.00 |
| <i>Mfap4</i>                                 | microfibrillar-associated protein 4                                                                                             | 1424010 at   | -2.94 | 0.00 |
| <i>2310005P05Rik</i>                         | RIKEN cDNA 2310005P05 gene                                                                                                      | 1417877 at   | -2.94 | 0.00 |
| <i>Egln3</i>                                 | EGL nine homolog 3 (C. elegans)                                                                                                 | 1418648 at   | -2.95 | 0.00 |
| <i>Lrrc39</i>                                | leucine rich repeat containing 39                                                                                               | 1445841 at   | -2.95 | 0.00 |
| <i>Cxcr4</i>                                 | chemokine (C-X-C motif) receptor 4                                                                                              | 1448710 at   | -2.96 | 0.00 |
| <i>Ak311</i>                                 | adenylate kinase 3 alpha-like 1                                                                                                 | 1450387 s at | -2.97 | 0.00 |
| <i>Ptgfr</i>                                 | prostaglandin F receptor                                                                                                        | 1453924 a at | -2.97 | 0.00 |
| <i>Fgf12</i>                                 | fibroblast growth factor 12                                                                                                     | 1451693 a at | -2.97 | 0.00 |
| <i>Tmem86a</i>                               | transmembrane protein 86A                                                                                                       | 1428758 at   | -2.97 | 0.00 |
| <i>Kcnd2</i>                                 | potassium voltage-gated channel, Shal-related family, member 2                                                                  | 1450773 at   | -2.98 | 0.00 |
| <i>1110037P11Rik</i>                         | RIKEN cDNA 1110037P11 gene                                                                                                      | 1430269 at   | -2.98 | 0.00 |
| <i>Efh1</i>                                  | EF hand domain containing 1                                                                                                     | 1448507 at   | -2.98 | 0.00 |
| <i>1190002N15Rik</i>                         | RIKEN cDNA 1190002N15 gene                                                                                                      | 1433581 at   | -2.99 | 0.00 |
| <i>AI317158</i>                              | expressed sequence AI317158                                                                                                     | 1445481 at   | -2.99 | 0.00 |
| <i>Stc2</i>                                  | stanniocalcin 2                                                                                                                 | 1449484 at   | -2.99 | 0.00 |
| <i>Rab3a</i>                                 | RAB3A, member RAS oncogene family                                                                                               | 1422589 at   | -3.00 | 0.00 |
| <i>Mss1</i>                                  | metastasis suppressor 1                                                                                                         | 1446284 at   | -3.00 | 0.00 |
| <i>Ppil1</i>                                 | peptidylprolyl isomerase (cyclophilin)-like 1                                                                                   | 1428892 at   | -3.00 | 0.00 |
| <i>Hdac9</i>                                 | histone deacetylase 9                                                                                                           | 1434572 at   | -3.00 | 0.00 |
| <i>1500005K14Rik</i>                         | RIKEN cDNA 1500005K14 gene                                                                                                      | 1429764 at   | -3.01 | 0.00 |
| <i>Kctd12b</i>                               | potassium channel tetramerisation domain containing 12b                                                                         | 1442368 at   | -3.01 | 0.00 |
| <i>Spare1</i>                                | SPARC-like 1 (mast9, hevjin)                                                                                                    | 1416114 at   | -3.01 | 0.00 |
| <i>Wif1</i>                                  | Wnt inhibitory factor 1                                                                                                         | 1425425 a at | -3.03 | 0.00 |
| <i>Galm</i>                                  | galactose mutarotase                                                                                                            | 1452583 s at | -3.03 | 0.00 |
| <i>Upk3b</i>                                 | uroplakin 3B                                                                                                                    | 1454881 s at | -3.04 | 0.00 |

|                                   |                                                                                                                                                       |              |       |      |
|-----------------------------------|-------------------------------------------------------------------------------------------------------------------------------------------------------|--------------|-------|------|
| <i>Jph2</i>                       | junctionophilin 2                                                                                                                                     | 1455404 at   | -3.04 | 0.00 |
| <i>Sema3c</i>                     | sema domain, immunoglobulin domain (Ig), short basic domain, secreted, (semaphorin) 3C                                                                | 1429348 at   | -3.05 | 0.00 |
| <i>Pde4d</i>                      | phosphodiesterase 4D, cAMP specific                                                                                                                   | 1459311 at   | -3.05 | 0.00 |
| <i>Gpm6a</i>                      | glycoprotein m6a                                                                                                                                      | 1456741 s at | -3.06 | 0.00 |
| <i>Sox7</i>                       | SRY-box containing gene 7                                                                                                                             | 1416564 at   | -3.06 | 0.00 |
| ---                               | Transcribed locus                                                                                                                                     | 1437967 at   | -3.08 | 0.00 |
| <i>Wnt5a</i>                      | wingless-related MMTV integration site 5A                                                                                                             | 1436791 at   | -3.08 | 0.00 |
| <i>Fblim1</i>                     | filamin binding LIM protein 1                                                                                                                         | 1449141 at   | -3.08 | 0.00 |
| <i>4930534B04Rik</i>              | RIKEN cDNA 4930534B04 gene                                                                                                                            | 1441867 x at | -3.09 | 0.00 |
| ---                               | ---                                                                                                                                                   | 1450085 at   | -3.09 | 0.00 |
| <i>Kif1b</i>                      | kinesin family member 1B                                                                                                                              | 1455182 at   | -3.10 | 0.00 |
| <i>Acta2</i>                      | actin, alpha 2, smooth muscle, aorta                                                                                                                  | 1416454 s at | -3.11 | 0.00 |
| <i>Itih5</i>                      | inter-alpha (globulin) inhibitor H5                                                                                                                   | 1441946 at   | -3.11 | 0.00 |
| ---                               | 0 day neonate thymus cDNA, RIKEN full-length enriched library, clone:A430057L20 product:unclassifiable, full insert sequence                          | 1446205 at   | -3.11 | 0.00 |
| <i>Ppp1r14c /// 4930402H24Rik</i> | protein phosphatase 1, regulatory (inhibitor) subunit 14c /// RIKEN cDNA 4930402H24 gene                                                              | 1430286_s at | -3.12 | 0.00 |
| <i>Cenpa</i>                      | Centromere autoantigen A                                                                                                                              | 1444416 at   | -3.12 | 0.00 |
| <i>LOC669637</i>                  | similar to calcium channel, voltage-dependent, alpha 2/delta subunit 2                                                                                | 1450754 at   | -3.14 | 0.00 |
| ---                               | ---                                                                                                                                                   | 1444025 at   | -3.14 | 0.00 |
| <i>Nov</i>                        | nephroblastoma overexpressed gene                                                                                                                     | 1426852 x at | -3.15 | 0.00 |
| <i>Epha4</i>                      | Eph receptor A4                                                                                                                                       | 1421929 at   | -3.16 | 0.00 |
| <i>Lrrc3b</i>                     | leucine rich repeat containing 3B                                                                                                                     | 1451245 at   | -3.16 | 0.00 |
| <i>D330010C22Rik</i>              | RIKEN cDNA 330010C22 gene                                                                                                                             | 1444404 at   | -3.17 | 0.00 |
| <i>Kcnd2</i>                      | potassium voltage-gated channel, Shal-related family, member 2                                                                                        | 1422834 at   | -3.19 | 0.00 |
| <i>Epha4</i>                      | Eph receptor A4                                                                                                                                       | 1429021 at   | -3.21 | 0.00 |
| <i>Cpeb3</i>                      | cytoplasmic polyadenylation element binding protein 3                                                                                                 | 1437765 at   | -3.21 | 0.00 |
| <i>Hey1</i>                       | hairly/enhancer-of-split related with YRPW motif 1                                                                                                    | 1415999 at   | -3.21 | 0.00 |
| <i>Sl8sia4</i>                    | ST8 alpha-N-acetyl-neuraminidase alpha-2,8-sialyltransferase 4                                                                                        | 1419186 a at | -3.22 | 0.00 |
| <i>Tmc7</i>                       | transmembrane channel-like gene family 7                                                                                                              | 1456981 at   | -3.23 | 0.00 |
| <i>Tmprss13</i>                   | transmembrane protease, serine 13                                                                                                                     | 1427477 at   | -3.24 | 0.00 |
| <i>D0H4S114</i>                   | DNA segment, human D4S114                                                                                                                             | 1450839 at   | -3.24 | 0.00 |
| <i>D0H4S114</i>                   | DNA segment, human D4S114                                                                                                                             | 1436736 x at | -3.24 | 0.00 |
| <i>Slc22a3</i>                    | solute carrier family 22 (organic cation transporter), member 3                                                                                       | 1420444 at   | -3.25 | 0.00 |
| <i>Dnmt3a</i>                     | DNA methyltransferase 3A                                                                                                                              | 1423065 at   | -3.26 | 0.00 |
| <i>Mmp15</i>                      | matrix metalloproteinase 15                                                                                                                           | 1422597 at   | -3.26 | 0.00 |
| <i>Iqgap2</i>                     | IQ motif containing GTPase activating protein 2                                                                                                       | 1459894 at   | -3.27 | 0.00 |
| <i>Arhgap18</i>                   | Rho GTPase activating protein 18                                                                                                                      | 1438882 at   | -3.27 | 0.00 |
| <i>Cilp</i>                       | cartilage intermediate layer protein, nucleotide pyrophosphohydrolase                                                                                 | 1457296 at   | -3.28 | 0.00 |
| <i>Mmp15</i>                      | Matrix metalloproteinase 15                                                                                                                           | 1439734 at   | -3.28 | 0.00 |
| <i>2610301F02Rik</i>              | RIKEN cDNA 2610301F02 gene                                                                                                                            | 1447250 a at | -3.29 | 0.00 |
| <i>Fsd2</i>                       | fibronectin type III and SPRY domain containing 2                                                                                                     | 1457031 at   | -3.29 | 0.00 |
| <i>Cpeb3</i>                      | cytoplasmic polyadenylation element binding protein 3                                                                                                 | 1456048 at   | -3.30 | 0.00 |
| <i>Lum</i>                        | lumican                                                                                                                                               | 1423607 at   | -3.30 | 0.00 |
| <i>Hmcn1</i>                      | hemicentin 1                                                                                                                                          | 1438532 at   | -3.31 | 0.00 |
| <i>Dcakd</i>                      | dephospho-CoA kinase domain containing                                                                                                                | 1460205 at   | -3.32 | 0.00 |
| <i>Igf2</i>                       | insulin-like growth factor 2                                                                                                                          | 1448152 at   | -3.32 | 0.00 |
| <i>Stmn2</i>                      | stathmin-like 2                                                                                                                                       | 1423280 at   | -3.32 | 0.00 |
| ---                               | ---                                                                                                                                                   | 1441220 at   | -3.32 | 0.00 |
| <i>Myh11</i>                      | myosin, heavy polypeptide 11, smooth muscle                                                                                                           | 1448962 at   | -3.33 | 0.00 |
| <i>Sdpr</i>                       | serum deprivation response                                                                                                                            | 1416778 at   | -3.33 | 0.00 |
| <i>Cpeb3</i>                      | cytoplasmic polyadenylation element binding protein 3                                                                                                 | 1455372 at   | -3.33 | 0.00 |
| ---                               | ---                                                                                                                                                   | 1434423 at   | -3.35 | 0.00 |
| <i>Cxcl12</i>                     | chemokine (C-X-C motif) ligand 12                                                                                                                     | 1417574 at   | -3.35 | 0.00 |
| <i>Tspan13</i>                    | tetraspanin 13                                                                                                                                        | 1418643 at   | -3.35 | 0.00 |
| <i>Ok</i>                         | Quaking                                                                                                                                               | 1438892 at   | -3.37 | 0.00 |
| <i>Tbc1d10c</i>                   | TBC1 domain family, member 10c                                                                                                                        | 1454850 at   | -3.37 | 0.00 |
| <i>Kitl</i>                       | kit ligand                                                                                                                                            | 1415855 at   | -3.38 | 0.00 |
| <i>Col8a1</i>                     | procollagen, type VIII, alpha 1                                                                                                                       | 1455627 at   | -3.39 | 0.00 |
| <i>Mmp15</i>                      | matrix metalloproteinase 15                                                                                                                           | 1437462 x at | -3.40 | 0.00 |
| <i>Copg2as2</i>                   | coatamer protein complex, subunit gamma 2, antisense 2                                                                                                | 1427123 s at | -3.40 | 0.00 |
| <i>Cnn1</i>                       | calponin 1                                                                                                                                            | 1417917 at   | -3.40 | 0.00 |
| <i>Casq1</i>                      | calsequestrin 1                                                                                                                                       | 1422598 at   | -3.41 | 0.00 |
| <i>Tuba8</i>                      | tubulin, alpha 8                                                                                                                                      | 1419518 at   | -3.42 | 0.00 |
| <i>Syt12</i>                      | synaptotagmin-like 2                                                                                                                                  | 1421594 a at | -3.44 | 0.00 |
| <i>Asb10</i>                      | ankyrin repeat and SOCS box-containing protein 10                                                                                                     | 1421466 at   | -3.48 | 0.00 |
| <i>Kcna1</i>                      | potassium voltage-gated channel, shaker-related subfamily, member 1                                                                                   | 1455785 at   | -3.53 | 0.00 |
| <i>A530016O06Rik</i>              | RIKEN cDNA A530016O06 gene                                                                                                                            | 1434191 at   | -3.54 | 0.00 |
| <i>Dbp</i>                        | D site albumin promoter binding protein                                                                                                               | 1438211 s at | -3.54 | 0.00 |
| <i>Gas1</i>                       | growth arrest specific 1                                                                                                                              | 1416855 at   | -3.54 | 0.00 |
| <i>Igsf1</i>                      | immunoglobulin superfamily, member 1                                                                                                                  | 1433652 at   | -3.56 | 0.00 |
| <i>Tspan13</i>                    | tetraspanin 13                                                                                                                                        | 1460239 at   | -3.56 | 0.00 |
| <i>Wnt5a</i>                      | wingless-related MMTV integration site 5A                                                                                                             | 1448818 at   | -3.57 | 0.00 |
| <i>Cdkn1c</i>                     | cyclin-dependent kinase inhibitor 1C (P57)                                                                                                            | 1417649 at   | -3.58 | 0.00 |
| <i>Fbln5</i>                      | fibulin 5                                                                                                                                             | 1416164 at   | -3.59 | 0.00 |
| <i>Im2a</i>                       | integral membrane protein 2A                                                                                                                          | 1423608 at   | -3.60 | 0.00 |
| <i>Efnb3</i>                      | ephrin B3                                                                                                                                             | 1423085 at   | -3.61 | 0.00 |
| <i>Kif1b</i>                      | kinesin family member 1B                                                                                                                              | 1451642 at   | -3.63 | 0.00 |
| ---                               | 15 days embryo embryonic body below diaphragm cDNA, RIKEN full-length enriched library, clone:8230401F05 product:unclassifiable, full insert sequence | 1441111 at   | -3.64 | 0.00 |
| <i>Dbp</i>                        | D site albumin promoter binding protein                                                                                                               | 1418174 at   | -3.67 | 0.00 |
| <i>Ltbp4</i>                      | latent transforming growth factor beta binding protein 4                                                                                              | 1436665 a at | -3.68 | 0.00 |
| <i>Gas1</i>                       | growth arrest specific 1                                                                                                                              | 1448494 at   | -3.70 | 0.00 |
| <i>Myc1</i>                       | myc target 1                                                                                                                                          | 1447584 s at | -3.70 | 0.00 |
| <i>Plekhh1</i>                    | pleckstrin homology domain containing, family H (with MyTH4 domain) member 1                                                                          | 1435053 s at | -3.71 | 0.00 |
| <i>Iigb1</i>                      | integrin, beta-like 1                                                                                                                                 | 1425039 at   | -3.71 | 0.00 |
| <i>Hlf</i>                        | hepatic leukemia factor                                                                                                                               | 1434736 at   | -3.72 | 0.00 |
| <i>Myc1</i>                       | myc target 1                                                                                                                                          | 1426433 at   | -3.73 | 0.00 |
| <i>Abca9</i>                      | ATP-binding cassette transporter sub-family A member 9                                                                                                | 1440879 at   | -3.74 | 0.00 |
| <i>Ok</i>                         | quaking                                                                                                                                               | 1425597 a at | -3.76 | 0.00 |
| <i>Tmem25</i>                     | transmembrane protein 25                                                                                                                              | 1436644 x at | -3.77 | 0.00 |
| <i>Ptgif</i>                      | prostaglandin F receptor                                                                                                                              | 1420349 at   | -3.77 | 0.00 |
| <i>1200009O22Rik</i>              | RIKEN cDNA 1200009O22 gene                                                                                                                            | 1428922 at   | -3.78 | 0.00 |
| <i>Aqp7</i>                       | aquaporin 7                                                                                                                                           | 1418849 x at | -3.79 | 0.00 |
| <i>Fgf12</i>                      | fibroblast growth factor 12                                                                                                                           | 1440270 at   | -3.80 | 0.00 |
| <i>Tspan2</i>                     | tetraspanin 2                                                                                                                                         | 1424567 at   | -3.83 | 0.00 |

|                                              |                                                                                                      |              |        |      |
|----------------------------------------------|------------------------------------------------------------------------------------------------------|--------------|--------|------|
| <i>Cfd</i>                                   | complement factor D (adipsin)                                                                        | 1417867 at   | -3.83  | 0.00 |
| <i>Tmem16d</i>                               | transmembrane protein 16D (eight membrane-spanning domains)                                          | 1442143 at   | -3.84  | 0.00 |
| <i>BB001228</i>                              | expressed sequence BB001228                                                                          | 1455425 at   | -3.86  | 0.00 |
| <i>2610301F02Rik</i>                         | RIKEN cDNA 2610301F02 gene                                                                           | 1460125 at   | -3.86  | 0.00 |
| <i>Col6a3 /// LOC674521</i>                  | procollagen, type VI, alpha 3 /// similar to alpha 3 type VI collagen isoform 1 precursor            | 1424131 at   | -3.87  | 0.00 |
| <i>Epha4</i>                                 | Eph receptor A4                                                                                      | 1439757 s at | -3.87  | 0.00 |
| <i>Cenpa</i>                                 | centromere autoantigen A                                                                             | 1450842 a at | -3.88  | 0.00 |
| <i>Reep1</i>                                 | receptor accessory protein 1                                                                         | 1433509 s at | -3.89  | 0.00 |
| <i>1810011O10Rik</i>                         | RIKEN cDNA 1810011O10 gene                                                                           | 1451415 at   | -3.94  | 0.00 |
| <i>Ucp1</i>                                  | uncoupling protein 1 (mitochondrial, proton carrier)                                                 | 1418197 at   | -3.94  | 0.00 |
| <i>Islr</i>                                  | immunoglobulin superfamily containing leucine-rich repeat                                            | 1418450 at   | -3.99  | 0.00 |
| <i>Igf1</i>                                  | insulin-like growth factor 1                                                                         | 1437401 at   | -4.05  | 0.00 |
| <i>Tfrc</i>                                  | transferrin receptor                                                                                 | 1452661 at   | -4.06  | 0.00 |
| <i>Fblim1</i>                                | filamin binding LIM protein 1                                                                        | 1418569 at   | -4.06  | 0.00 |
| <i>Tagln</i>                                 | transgelin                                                                                           | 1423505 at   | -4.07  | 0.00 |
| <i>Lrtm1</i>                                 | leucine-rich repeats and transmembrane domains 1                                                     | 1443866 at   | -4.10  | 0.00 |
| <i>Ppargc1a</i>                              | peroxisome proliferative activated receptor, gamma, coactivator 1 alpha                              | 1460336 at   | -4.11  | 0.00 |
| <i>Igh-6</i>                                 | immunoglobulin heavy chain 6 (heavy chain of IgM)                                                    | 1427329 a at | -4.13  | 0.00 |
| <i>Iiga8</i>                                 | integrin alpha 8                                                                                     | 1427489 at   | -4.13  | 0.00 |
| <i>LOC668940 /// LOC669705 /// LOC674786</i> | hypothetical protein LOC668940 /// hypothetical protein LOC669705 /// hypothetical protein LOC674786 | 1444305_at   | -4.18  | 0.00 |
| <i>Cbr2</i>                                  | carbonyl reductase 2                                                                                 | 1418509 at   | -4.20  | 0.00 |
| <i>Mbp</i>                                   | myelin basic protein                                                                                 | 1433532 a at | -4.21  | 0.00 |
| <i>Copg2as2</i>                              | coatamer protein complex, subunit gamma 2, antisense 2                                               | 1427320 at   | -4.21  | 0.00 |
| <i>Car3</i>                                  | carbonic anhydrase 3                                                                                 | 1430584 s at | -4.22  | 0.00 |
| <i>Plekhh1</i>                               | pleckstrin homology domain containing, family H (with MyTH4 domain) member 1                         | 1447807 s at | -4.23  | 0.00 |
| <i>Sdpr</i>                                  | serum deprivation response                                                                           | 1416779 at   | -4.25  | 0.00 |
| <i>Agtrl1</i>                                | angiotensin receptor-like 1                                                                          | 1423037 at   | -4.26  | 0.00 |
| <i>Tuba4</i>                                 | tubulin, alpha 4                                                                                     | 1417373 a at | -4.28  | 0.00 |
| <i>Ogn</i>                                   | osteolectin                                                                                          | 1419662 at   | -4.33  | 0.00 |
| <i>Aspn</i>                                  | asporin                                                                                              | 1448421 s at | -4.35  | 0.00 |
| <i>Lrtm1</i>                                 | leucine-rich repeats and transmembrane domains 1                                                     | 1444429 at   | -4.37  | 0.00 |
| <i>Sh3kbp1</i>                               | SH3-domain kinase binding protein 1                                                                  | 1431592 a at | -4.38  | 0.00 |
| ---                                          | Transcribed locus                                                                                    | 1455961 at   | -4.38  | 0.00 |
| <i>Asph</i>                                  | aspartate-beta-hydroxylase                                                                           | 1425274 at   | -4.44  | 0.00 |
| <i>1700020C11Rik</i>                         | RIKEN cDNA 1700020C11 gene                                                                           | 1424223 at   | -4.44  | 0.00 |
| <i>Gpc6</i>                                  | glypican 6                                                                                           | 1428774 at   | -4.44  | 0.00 |
| <i>Sdpr</i>                                  | serum deprivation response                                                                           | 1443832 s at | -4.48  | 0.00 |
| <i>Ogn</i>                                   | osteolectin                                                                                          | 1419663 at   | -4.50  | 0.00 |
| ---                                          | ---                                                                                                  | 1446771 at   | -4.51  | 0.00 |
| <i>5730410E15Rik</i>                         | RIKEN cDNA 5730410E15 gene                                                                           | 1438667 at   | -4.53  | 0.00 |
| <i>Sertad4</i>                               | SERTA domain containing 4                                                                            | 1454877 at   | -4.53  | 0.00 |
| <i>Lmod3</i>                                 | leiomodrin 3 (fetal)                                                                                 | 1439658 at   | -4.60  | 0.00 |
| <i>2310042D19Rik</i>                         | RIKEN cDNA 2310042D19 gene                                                                           | 1429598 at   | -4.60  | 0.00 |
| <i>Myl9</i>                                  | myosin, light polypeptide 9, regulatory                                                              | 1452670 at   | -4.60  | 0.00 |
| <i>Clqtnf9</i>                               | Clq and tumor necrosis factor related protein 9                                                      | 1442033 at   | -4.61  | 0.00 |
| <i>Ecm2</i>                                  | extracellular matrix protein 2, female organ and adipocyte specific                                  | 1440096 at   | -4.63  | 0.00 |
| <i>Klhdc8a</i>                               | kelch domain containing 8A                                                                           | 1424885 at   | -4.78  | 0.00 |
| ---                                          | Transcribed locus, weakly similar to XP_328828.1 predicted protein [Neurospora crassa]               | 1434413 at   | -4.80  | 0.00 |
| <i>Colec11</i>                               | collectin sub-family member 11                                                                       | 1458345 s at | -4.85  | 0.00 |
| <i>Pcsk6</i>                                 | proprotein convertase subtilisin/kexin type 6                                                        | 1426981 at   | -4.85  | 0.00 |
| <i>Retla</i>                                 | resistin like alpha                                                                                  | 1449015 at   | -4.89  | 0.00 |
| <i>Sh3kbp1</i>                               | SH3-domain kinase binding protein 1                                                                  | 1460337 at   | -4.99  | 0.00 |
| <i>Akr1c14</i>                               | aldo-keto reductase family 1, member C14                                                             | 1418979 at   | -5.13  | 0.00 |
| <i>1810011O10Rik</i>                         | RIKEN cDNA 1810011O10 gene                                                                           | 1435595 at   | -5.17  | 0.00 |
| <i>Gpc6</i>                                  | glypican 6                                                                                           | 1437417 s at | -5.18  | 0.00 |
| <i>Inmt</i>                                  | indolethylamine N-methyltransferase                                                                  | 1418697 at   | -5.22  | 0.00 |
| <i>2210419108Rik</i>                         | RIKEN cDNA 2210419108 gene                                                                           | 1429637 at   | -5.24  | 0.00 |
| <i>Dmn</i>                                   | desmuslin                                                                                            | 1457275 at   | -5.28  | 0.00 |
| <i>Bex1</i>                                  | brain expressed gene 1                                                                               | 1448595 a at | -5.39  | 0.00 |
| <i>Simn2</i>                                 | stathmin-like 2                                                                                      | 1423281 at   | -5.52  | 0.00 |
| <i>Asph</i>                                  | aspartate-beta-hydroxylase                                                                           | 1425275 at   | -5.65  | 0.00 |
| <i>Klra3</i>                                 | killer cell lectin-like receptor, subfamily A, member 3                                              | 1425436 x at | -5.65  | 0.00 |
| <i>Fmod</i>                                  | fibromodulin                                                                                         | 1456084 x at | -5.67  | 0.00 |
| <i>Cenpf</i>                                 | centromere autoantigen F                                                                             | 1427161 at   | -5.76  | 0.00 |
| <i>Cyt1</i>                                  | cytokine like 1                                                                                      | 1456793 at   | -5.78  | 0.00 |
| <i>Col14a1</i>                               | procollagen, type XIV, alpha 1                                                                       | 1427168 a at | -5.81  | 0.00 |
| <i>Till1</i>                                 | tubulin tyrosine ligase-like 1                                                                       | 1436833 x at | -5.87  | 0.00 |
| <i>Aspn</i>                                  | asporin                                                                                              | 1416652 at   | -5.90  | 0.00 |
| <i>Tuba4</i>                                 | tubulin, alpha 4                                                                                     | 1417374 at   | -5.95  | 0.00 |
| <i>Sh3kbp1</i>                               | SH3-domain kinase binding protein 1                                                                  | 1456261 at   | -6.40  | 0.00 |
| <i>Abca8a</i>                                | ATP-binding cassette, sub-family A (ABC1), member 8a                                                 | 1427371 at   | -6.59  | 0.00 |
| <i>Gpr22</i>                                 | G protein-coupled receptor 22                                                                        | 1434673 at   | -6.66  | 0.00 |
| <i>Scube2</i>                                | signal peptide, CUB domain, EGF-like 2                                                               | 1453486 a at | -7.18  | 0.00 |
| <i>Gpr22</i>                                 | G protein-coupled receptor 22                                                                        | 1434672 at   | -7.34  | 0.00 |
| <i>Penk1</i>                                 | preproenkephalin 1                                                                                   | 1427038 at   | -7.73  | 0.00 |
| <i>4631408O11Rik</i>                         | RIKEN cDNA 4631408O11 gene                                                                           | 1429159 at   | -7.79  | 0.00 |
| <i>Iiga8</i>                                 | integrin alpha 8                                                                                     | 1454966 at   | -8.48  | 0.00 |
| <i>Car3</i>                                  | carbonic anhydrase 3                                                                                 | 1460256 at   | -8.52  | 0.00 |
| <i>H19</i>                                   | H19 fetal liver mRNA                                                                                 | 1448194 a at | -10.83 | 0.00 |
| <i>Agtrl1</i>                                | angiotensin receptor-like 1                                                                          | 1438651 a at | -14.04 | 0.00 |
| <i>Adipoq</i>                                | adiponectin, C1Q and collagen domain containing                                                      | 1422651 at   | -16.81 | 0.00 |
| <i>Car3</i>                                  | carbonic anhydrase 3                                                                                 | 1449434 at   | -38.05 | 0.00 |



TABLE S5 - Canonical pathways modified by LPS

| Ingenity Canonical Pathways                                                    | -log(p)-value Ratio | Molecules |
|--------------------------------------------------------------------------------|---------------------|-----------|
| Acute Inflammation Response Signaling                                          | 8.04E02             | 2.02E-01  |
| Interferon Signaling                                                           | 7.74E00             | 4.33E-01  |
| Activation of IRF by Cytosolic Pattern Recognition Receptors                   | 6.86E00             | 2.33E-01  |
| Hepatic Fibrosis / Hepatic Stellate Cell Activation                            | 6.15E00             | 2.01E-01  |
| Dendritic Cell Maturation                                                      | 6.04E00             | 1.51E-01  |
| Role of Macrophages, Fibroblasts and Endothelial Cells in Rheumatoid Arthritis | 5.59E00             | 1.34E-01  |
| Relapse and Mediated Apoptosis Signaling                                       | 5.27E00             | 1.24E-01  |
| Antigen Presentation Pathways                                                  | 5.19E00             | 2.56E-01  |
| Role of Pattern Recognition Receptors in Recognition of Bacteria and Viruses   | 5.08E00             | 1.21E-01  |
| Death Receptor Signaling                                                       | 4.72E00             | 1.94E-01  |
| IL-10 Signaling                                                                | 4.49E00             | 2.14E-01  |
| Role of RIG-I-like Receptors in Antiviral Innate Immunity                      | 4.19E00             | 1.98E-01  |
| Complement System                                                              | 4E+00               | 2.55E-01  |
| Bladder Cancer Signaling                                                       | 3.99E00             | 1.45E-01  |
| Pathogenesis of Multiple Sclerosis                                             | 3.84E00             | 3.96E-01  |
| Role of PKR in Interferon Induction and Antiviral Response                     | 3.82E00             | 2.39E-01  |
| JAK/Stat Signaling                                                             | 3.7E00              | 2.19E-01  |
| Glucocorticoid Receptor Signaling                                              | 3.67E00             | 1.25E-01  |
| GM-CSF Signaling                                                               | 3.62E00             | 2.09E-01  |
| IL-9 Signaling                                                                 | 3.42E00             | 2.43E-01  |
| Induction of Apoptosis by HIV1                                                 | 3.38E00             | 2E-01     |
| TREM1 Signaling                                                                | 3.29E00             | 1.74E-01  |
| NF-κB Signaling                                                                | 3.18E00             | 1.44E-01  |
| IL-17 Signaling                                                                | 3.18E00             | 1.89E-01  |
| Protein Signaling                                                              | 3.18E00             | 1.87E-01  |
| Type 1 Diabetes Mellitus Signaling                                             | 3.14E00             | 1.51E-01  |
| p38 MAPK Signaling                                                             | 3.08E00             | 1.77E-01  |
| Toll-like Receptor Signaling                                                   | 3.04E00             | 2.04E-01  |
| TNFR2 Signaling                                                                | 2.94E00             | 2.42E-01  |
| Neuroprotective Role of THOP1 in Alzheimer's Disease                           | 2.89E00             | 1.67E-01  |
| Hepatic Cholestasis                                                            | 2.84E00             | 1.21E-01  |
| Hepatic Activation                                                             | 2.74E00             | 1.55E-01  |
| Apoptosis Signaling                                                            | 2.74E00             | 1.67E-01  |
| Nitrogen Metabolism                                                            | 2.71E00             | 7.52E-02  |
| TNFR1 Signaling                                                                | 2.63E00             | 1.92E-01  |
| Production of Nitric Oxide and Reactive Oxygen Species in Macrophages          | 2.58E00             | 1.19E-01  |
| Growth Hormone Signaling                                                       | 2.57E00             | 1.71E-01  |
| Interplay between Dendritic Cells and Natural Killer Cells                     | 2.45E00             | 1.44E-01  |
| Oncostatin M Signaling                                                         | 2.45E00             | 2.29E-01  |
| Erythropoietin Signaling                                                       | 2.44E00             | 1.58E-01  |
| Type 1 Diabetes Mellitus Signaling                                             | 2.35E00             | 1.08E-01  |
| LXR/RXR Activation                                                             | 2.33E00             | 1.4E-01   |
| HIF-1 Signaling                                                                | 2.29E00             | 1.39E-01  |
| IL-15 Signaling                                                                | 2.21E00             | 1.64E-02  |
| Docosahexaenoic Acid (DHA) Signaling                                           | 2.2E00              | 1.67E-01  |
| Grass-venus-Host Disease Signaling                                             | 2.2E00              | 1.63E-01  |
| IL7 Signaling in Hematopoietic Progenitor Cells                                | 2.17E00             | 1.62E-02  |
| Atherosclerosis Signaling                                                      | 2.16E00             | 1.33E-01  |
| Lymphotxin β Receptor Signaling                                                | 2.15E00             | 1.64E-01  |
| Cellular-mediated Endocytosis Signaling                                        | 2.15E00             | 1.41E-01  |
| Relaxin Signaling                                                              | 2.04E00             | 1.48E-01  |
| NF-κB Activation by Viruses                                                    | 2.02E00             | 1.18E-02  |
| IL-4 Signaling                                                                 | 2.0E00              | 1.51E-01  |
| Amyotrophic Lateral Sclerosis Signaling                                        | 1.99E00             | 1.25E-01  |
| Wnt5a Entry via Endocytic Pathways                                             | 1.98E00             | 1.33E-01  |
| TWEAK Signaling                                                                | 1.95E00             | 1.84E-01  |
| Angiotensin Signaling                                                          | 1.95E00             | 1.49E-01  |
| Role of PI3K/AKT Signaling in the Pathogenesis of Influenza                    | 1.92E00             | 1.19E-01  |
| Pancreatic Adenocarcinoma Signaling                                            | 1.91E00             | 1.93E-01  |
| Systemic Lupus Erythematosus Signaling                                         | 1.91E00             | 1.29E-01  |
| Leptin Signaling                                                               | 1.89E00             | 1.33E-01  |
| Clastrin-mediated Endocytosis Signaling                                        | 1.88E00             | 1.2E-01   |
| PI3K/AKT Signaling                                                             | 1.85E00             | 1.15E-01  |
| Acute Myeloid Leukemia Signaling                                               | 1.84E00             | 1.46E-01  |
| p53 Signaling                                                                  | 1.79E00             | 1.41E-01  |
| RANK Signaling in Osteoclasts                                                  | 1.79E00             | 1.35E-01  |
| IL-10 Signaling                                                                | 1.75E00             | 1.35E-01  |
| Colorectal Cancer Metastasis Signaling                                         | 1.74E00             | 1.06E-01  |
| PKR/RXR Activation                                                             | 1.72E00             | 1.1E-01   |
| Small Cell Lung Cancer Signaling                                               | 1.71E00             | 1.24E-01  |
| Gloma Invasiveness Signaling                                                   | 1.7E00              | 1.58E-01  |
| CNTF Signaling                                                                 | 1.68E00             | 1.54E-01  |
| Primary Immunodeficiency Signaling                                             | 1.68E00             | 1.03E-01  |
| PPAR Signaling                                                                 | 1.59E00             | 1.22E-01  |
| VEGF Signaling                                                                 | 1.59E00             | 1.24E-01  |
| Ary Hydrocarbon Receptor Signaling                                             | 1.58E00             | 1.1E-01   |
| ERK/MAPK Signaling                                                             | 1.57E00             | 1.09E-01  |
| Role of NFAT in Regulation of the Immune Response                              | 1.57E00             | 1E-01     |
| Natural Killer Cell Signaling                                                  | 1.57E00             | 1.43E-01  |
| Renal Cell Carcinoma Signaling                                                 | 1.5E00              | 1.39E-01  |
| IL-12 Signaling and Production in Macrophages                                  | 1.5E00              | 9.77E-02  |
| Primary Immunodeficiency Signaling                                             | 1.5E00              | 1.11E-01  |
| CD27 Signaling in Lymphocytes                                                  | 1.47E00             | 1.4E-01   |
| Insulin Receptor Signaling                                                     | 1.47E00             | 1.14E-01  |
| Allograft Rejection Signaling                                                  | 1.42E00             | 1.02E-01  |
| LPS-stimulated MAPK Signaling                                                  | 1.42E00             | 1.28E-01  |
| Melanoma Signaling                                                             | 1.39E00             | 1.52E-01  |
| T Cell Receptor Signaling                                                      | 1.39E00             | 1.1E-01   |
| IL-3 Signaling                                                                 | 1.38E00             | 1.39E-01  |
| Nitric Oxide Signaling in the Cardiovascular System                            | 1.38E00             | 1.03E-01  |
| Iron homeostasis Signaling                                                     | 1.38E00             | 1.39E-01  |
| Role of Osteoblasts, Osteoclasts and Chondrocytes in Rheumatoid Arthritis      | 1.37E00             | 1.03E-01  |
| Macrophagy Signaling                                                           | 1.34E00             | 1.22E-01  |
| Semaphorin Signaling in Neurons                                                | 1.33E00             | 1.54E-01  |
| Leptin Signaling in Obesity                                                    | 1.31E00             | 1.22E-01  |
| Autocrine Thyroid Disease Signaling                                            | 1.31E00             | 9.84E-02  |
| IL-22 Signaling                                                                | 1.29E00             | 1.79E-01  |
| Role of Hypercytokinemia/hyperchemokinaemia in the Pathogenesis of Influenza   | 1.29E00             | 1.11E-01  |
| Lysine Biosynthesis                                                            | 1.29E00             | 4.55E-02  |
| NF-κB Signaling in Neutrophils                                                 | 1.29E00             | 1.04E-01  |
| Renin-Angiotensin Signaling                                                    | 1.28E00             | 1.08E-01  |
| Cellular Effects of Sildenafil (Viagra)                                        | 1.28E00             | 9.93E-02  |
| NHERF-2 Signaling in Breast Cancer                                             | 1.24E00             | 1.27E-02  |
| PPAR/RXR Activation                                                            | 1.2E00              | 1E-01     |
| Axonal Guidance Signaling                                                      | 1.19E00             | 8.89E-02  |
| Natural Killer Cell Signaling                                                  | 1.17E00             | 9.62E-02  |
| Gloma Signaling                                                                | 1.17E00             | 1.07E-01  |
| MIF Regulation of Innate Immunity                                              | 1.16E00             | 1.3E-01   |
| Lysine Biosynthesis                                                            | 1.12E00             | 8.67E-02  |
| Aggrin Interactions at Neuromuscular Junction                                  | 1.12E00             | 1.3E-01   |
| Prostate Cancer Signaling                                                      | 1.1E00              | 1.04E-01  |
| Alexis T Cell and B Cell Signaling in Rheumatoid Arthritis                     | 1.1E00              | 1.1E-01   |
| G-Protein Coupled Receptor Signaling                                           | 1.1E00              | 9.55E-02  |
| PDGF Signaling                                                                 | 1.09E00             | 1.18E-01  |
| ILK/IKK Signaling                                                              | 1.08E00             | 1.12E-01  |
| CD40 Signaling                                                                 | 1.06E00             | 1.19E-01  |
| Phospholipase C Signaling                                                      | 1.06E00             | 8.98E-02  |
| B-Box Gamma Signaling                                                          | 1.05E00             | 1.04E-01  |
| ICOS/ICOSL Signaling in T Helper Cells                                         | 1.03E00             | 9.84E-02  |
| IL-1 Signaling                                                                 | 1.03E00             | 1.04E-01  |
| Thyroid Cancer Signaling                                                       | 1.03E00             | 1.29E-01  |

|                                                                      |          |          |                                                                                                                                                                                                  |
|----------------------------------------------------------------------|----------|----------|--------------------------------------------------------------------------------------------------------------------------------------------------------------------------------------------------|
| Airway Pathology in Chronic Obstructive Pulmonary Disease            | 9.94E-01 | 2.22E-01 | CXCL3, MMP8                                                                                                                                                                                      |
| Chemokine Signaling                                                  | 9.94E-01 | 1.2E-01  | CCL13, RRA52, CAMK1D, CCL7, CXCR4, CXCL12, PLCB1, CCL5, CALM1                                                                                                                                    |
| ERK5 Signaling                                                       | 9.65E-01 | 1.13E-01 | MYC, RRA52, MAP3K8, MEF2C, RPS3KAS, RPS3KAS, GNA13, EGFR                                                                                                                                         |
| Hypoxia Signaling in the Cardiovascular System                       | 9.65E-01 | 1.14E-01 | UBD, VEGFA, NFKBIA, NFKBIE, HIF1A, NFKBIB, SLC24A4, UBE2L6                                                                                                                                       |
| PKCδ Signaling in T Lymphocytes                                      | 9.36E-01 | 8.63E-02 | RAC2, RRA52, NFKBIA, MAP3K8, NFKBIE, RAC1, PIK3R5, FCER1G, MAP3K8, NFKB2, NFKBIB, LCP2                                                                                                           |
| IL-2 Signaling                                                       | 9.37E-01 | 1.21E-01 | SHC1, RAC2, IL2RG, RRA52, SYK, RAC1, PIK3R5                                                                                                                                                      |
| IL-15 Production                                                     | 9.28E-01 | 1.33E-01 | JAK2, NFKB2, STAT1, IRF1                                                                                                                                                                         |
| Ephrin Receptor Signaling                                            | 9.26E-01 | 9.09E-02 | RAC2, PAK6, CXCR4, RAC1, VEGFC, EPHA4, JAK2, STAT3, PCF, VEGFA, EFNB2, SHC1, EPHB1, GNG11, RRA52, CXCL12, EFNB3, GNA13                                                                           |
| Integrin Signaling                                                   | 9.25E-01 | 9.41E-02 | RAC2, PAK6, RHOC, ITGA8 (includes EG-9516), RAC1, PIK3R5, TSPAN2, JMS1, CAPN10, IGF1R, SHC1, MYL7, MYL9 (includes EG-98932), SHC1, ITGB2, ITGAM, RRA52, ACTG2 (includes EG-72), ITGB6, TSPAN4    |
| FXR/RXR Activation                                                   | 8.92E-01 | 9.71E-02 | PPARA, RAC2, APOE, PON1, SDC1, IL1RN, RAC1, FBP1, PLTP, PPARGC1A                                                                                                                                 |
| Sphingolipid Metabolism                                              | 8.57E-01 | 7.78E-02 | LPN1, ACER2, SPTLC2, SPHK1, DUSP18, LPN3, ARS8, SGM51, FADS3                                                                                                                                     |
| MAPK Activation                                                      | 8.57E-01 | 1.12E-01 | CXCL10, SERPINE1, GSK3IA, CD14, GEFBP3, SEMA5B, GEFBP3, CCL4, PRK01                                                                                                                              |
| Calcium Signaling                                                    | 8.29E-01 | 8.29E-02 | CAMK1D, TRDN, HDAC9 (includes EG-9734), MYH7B (includes EG-668940), TPM2, MYH11, RCAN1, MYL7, ATP2B2, PRKAR2B, TPM3, RYR3, CASQ1, MEFC2, ASPH, CASQ2, CALM1                                      |
| PTEN Signaling                                                       | 8.44E-01 | 9.52E-02 | SHC1, BCL2L1, RAC2, RRA52, CDKN1A, RAC1, PIK3R5, NFKB2, EGFR, MAGI3                                                                                                                              |
| Ca2+/12 Signaling                                                    | 8.25E-01 | 9.6E-02  | MYL9 (includes EG-98932), RAC2, RRA52, NFKBIA, NFKBIE, RAC1, PIK3R5, MEFC2, GNA13, NFKB2, NFKBIB, MYL7                                                                                           |
| Aminoglycans Metabolism                                              | 8.22E-01 | 6.81E-02 | PDE7A, DUSP18, UAP1, PDE4B, PDE4D, CY5B61, CH13L3, GPTP2                                                                                                                                         |
| Fcγ Receptor-mediated Phagocytosis in Macrophages and Monocytes      | 7.98E-01 | 9.9E-02  | HMOX1, RAC2, SYK, HCK, RAC1, ACTG2 (includes EG-72), FCGRI1A, FCGRA3, LCP2, PRKD1                                                                                                                |
| Actin Cytoskeleton Signaling                                         | 7.98E-01 | 8.51E-02 | FGF16, RAC2, PAK6, RFP3, PIK3R5, RAC1, MYT1B (includes EG-868940), MYH11, MYL7, MYL9 (includes EG-98932), SHC1, IQGAP2, RRA52, FGF12, CD14, LBP, ACTG2 (includes EG-72), GNA13, FGF7, MSN        |
| FCγRIIb Signaling in B Lymphocytes                                   | 7.78E-01 | 8.93E-02 | SHC1, RRA52, SYK, PIK3R5, FCGR2B                                                                                                                                                                 |
| Breast Cancer Regulation by Slathmin1                                | 7.64E-01 | 9.05E-02 | PPP1R14C, CAMK1D, PPP1R3C, RAC1, TUBA8A, PIK3R5, PPP1R14A, CASQ1, RRA52, PRKAR2B, GNG11, TUBA8, CDKN1A, PLCB1, GNA13, ADCY7, PRKD1, CALM1                                                        |
| Mitogenic Development and Pigmentation Signaling                     | 7.61E-01 | 1.02E-01 | KITLG, SHC1, PRKAR2B, RRA52, MITF, PIK3R5, RPS3KAS, RPS3KAS, ADCY7                                                                                                                               |
| N-Glycan Degradation                                                 | 7.48E-01 | 1.29E-01 | EDEM1, MAN2A1, MANBA, CH13L3                                                                                                                                                                     |
| FGF Signaling                                                        | 7.38E-01 | 1.02E-01 | FGF16, RAC2, FGF9, FGF12, RAC1, PIK3R5, RPS3KAS, STAT3, FGF7                                                                                                                                     |
| CXCR4 Signaling                                                      | 7.38E-01 | 8.98E-02 | RAC2, PAK6, RHOC, CXCR4, RAC1, PIK3R5, MYL7, MYL9 (includes EG-98932), GNG11, RRA52, CXCL12, PLCB1, GNA13, ADCY7, PRKD1                                                                          |
| AMPK Signaling                                                       | 7.35E-01 | 7.88E-02 | PFKFB3, RAC2, ADIPOQ, RAC1, PIK3R5, PFKFB2, EIF4EBP1, PRKAR2B, ADRB1, AK1, PRKAA2, HLA-B, AK3L1                                                                                                  |
| Communication between Innate and Adaptive Immune Cells               | 7.32E-01 | 6.93E-02 | CXCL10, TLR2, IL1RN, FCER1G, CD83, CCL5, TLR3                                                                                                                                                    |
| Estrogen-Dependent Breast Cancer Signaling                           | 7.32E-01 | 15-01    | RAC2, RRA52, IGF1, RAC1, PIK3R5, NFKB2, EGFR                                                                                                                                                     |
| 4-1BB Signaling in T Lymphocytes                                     | 7.1E-01  | 1.18E-01 | NFKBIA, NFKBIE, NFKB2, NFKBIB                                                                                                                                                                    |
| p70S6K Signaling                                                     | 6.96E-01 | 9.16E-02 | SHC1, RAC2, IL2RG, IL4R, RRA52, SYK, MAPT, RAC1, PIK3R5, PLCB1, PRKD1, EGFR                                                                                                                      |
| HGF Signaling                                                        | 6.94E-01 | 9.71E-02 | RAC2, RRA52, MAP3K8, CDKN1A, RAC1, PIK3R5, MAP3K8, STAT3, IL6, PRKD1                                                                                                                             |
| T Helper Cell Differentiation                                        | 6.82E-01 | 9.72E-02 | IL2RG, IL4R, TNFRSF1A, FCER1G, STAT3, IL6, STAT1                                                                                                                                                 |
| SAMPK/JNK Signaling                                                  | 6.74E-01 | 9.09E-02 | SHC1, RAC2, DAXX, GNG11, RRA52, RAC1, PIK3R5, FCER1G, GNA13                                                                                                                                      |
| AT1R                                                                 | 6.65E-01 | 1.13E-01 | GADD45B, NFKBIA, GADD45G, CDKN1A, BID, CHEK2                                                                                                                                                     |
| Role of NFAT in Cardiac Hypertrophy                                  | 6.58E-01 | 8.21E-02 | RAC2, CAMK1D, RAC1, PIK3R5, HDAC9 (includes EG-9734), IL6, RCAN1, SHC1, GNG11, PRKAR2B, RRA52, IGF1, PLCB1, MEFC2, ADCY7, PRKD1, CALM1                                                           |
| Cholelyoloximin/Gastrin-mediated Signaling                           | 6.56E-01 | 9.62E-02 | SHC1, RRA52, IL1RN, RHOC, PLCB1, MEFC2, EPHA4, GNA13, PRKD1, EGFR                                                                                                                                |
| LRP3-Mediated Inhibition of FXR Function                             | 6.48E-01 | 7.98E-02 | PPP1R14C, RAC2, RRA52, TNFRSF1A, MYD88, IL1R2, SULT1A1, ACSL5, ALA51, CD114, ACSL4, FABP7, CYP2B6, PLTP, LBP, ABCG3, ALDH3A1                                                                     |
| Cytotoxic T Lymphocyte-mediated Apoptosis of Target Cells            | 6.38E-01 | 9.09E-02 | FCER1G, BID, FAS                                                                                                                                                                                 |
| Ceramide Signaling                                                   | 6.34E-01 | 9.2E-02  | RAC2, RRA52, CNKSR1, TNFRSF1A, RAC1, SPHK1, PIK3R5, NFKB2                                                                                                                                        |
| CD28 Signaling in T Helper Cells                                     | 6.24E-01 | 8.33E-02 | RAC2, NFKBIA, SYK, NFKBIE, RAC1, PIK3R5, FCER1G, NFKB2, NFKBIB, LCP2, CALM1                                                                                                                      |
| EGF Signaling                                                        | 6.23E-01 | 1.02E-01 | SHC1, RAC1, PRKAR2B, RRA52, NOV, IGF1, RAC1, PIK3R5, IGFBP5                                                                                                                                      |
| IGF-1 Signaling                                                      | 6.16E-01 | 9E-02    | B2M, FCER1G                                                                                                                                                                                      |
| Lipid Antigen Presentation by CD1                                    | 6.09E-01 | 8.7E-02  | RAC2, RHOC, ACER2, RAC1, SPHK1, PIK3R5, PLCB1, CASP4, GNA13, ADCY7                                                                                                                               |
| Sphingosine-1-phosphate Signaling                                    | 6.02E-01 | 8.62E-02 | PANK1, ENPP3, CILP                                                                                                                                                                               |
| Pantothenate and CoA Biosynthesis                                    | 5.96E-01 | 4.69E-02 | GNG11, RRA52, GUCY1A3, CDKN1A, PIK3R5, ADCY7, GUCY1B3                                                                                                                                            |
| Antiproliferative Role of Somatostatin Receptor 2                    | 5.91E-01 | 8.97E-02 | RAC2, PIK3R5, RAC1, HDAC9 (includes EG-9734), CASP4, CAPN10, UBD, TGM2, SHC1, BCL2L1, HSP9A, GNG11, IGF1, PENK, PLCB1, GOSR1, CASP12 (includes EG-12364), PRKD1, EGFR                            |
| Huntington's Disease Signaling                                       | 5.88E-01 | 7.92E-02 | RAC2, SRG1, CDNH, RAC1, JAK2, NFKB2, RBP1, VEGFA, C3P2B, PRKAR2B, PAH, ADCY7, SMAD1, PRKD1, PPARGC1A                                                                                             |
| RAR Activation                                                       | 5.52E-01 | 8.29E-02 | TMEM87B, GUCY1A3, PIK3R5, CASP4, MYC, EGF2, HMOX1, RRA52, EGF2, PLA2G5, PLCB1, GNA13, ADCY7, PRKD1, GUCY1B3                                                                                      |
| Endothelin-1 Signaling                                               | 5.52E-01 | 8.57E-02 | VEGFA, RAC2, PRKAR2B, RRA52, FGF9, CD4, RAC1, PIK3R5, VEGFC, PCF, WNT5A, EGFR                                                                                                                    |
| Ovarian Cancer Signaling                                             | 5.39E-01 | 8.57E-02 | MYC, BCL2L1, RAC2, RRA52, CDKN1A, RAC1, PIK3R5, HDAC9 (includes EG-9734), NFKB2                                                                                                                  |
| Chronic Myeloid Leukemia Signaling                                   | 5.26E-01 | 8.57E-02 | MYL9 (includes EG-98932), RHP23, IGF1, SEPT14, ACTG2 (includes EG-72), GNA13, CDCK4, ARHGAP8, MSN, MYL7                                                                                          |
| ATM Signaling                                                        | 5.21E-01 | 9.09E-02 | GMP5, GULL, GCLM, GPTP2                                                                                                                                                                          |
| Glutamate Metabolism                                                 | 5.21E-01 | 5.13E-02 | MAP3K8, RHOC, PIK3R5, IL6, EIF4E, MYL7, MYL9 (includes EG-98932), ADRB1, GNG11, PRKAR2B, RRA52, IGF1, PLCB1, MEFC2, MAP3K8, GNA13, ADCY7, CALM1, HSPB1                                           |
| Cardiac Hypertrophy Signaling                                        | 5.19E-01 | 7.82E-02 | MGST1, DNAH4, NQO2, DNAJA4, PIK3R5, JUNB, DNAJB14, MAFF, HMOX1, RRA52, GGLM, ACTG2 (includes EG-72), FKBP5, NFE2L2, PRK01                                                                        |
| RHO2-mediated Oxidative Stress Response                              | 5.15E-01 | 8.2E-02  | RAC2, RRA52, SYK, PLA2G5, RAC1, PIK3R5, FCER1G, LCP2, PRKD1                                                                                                                                      |
| Protein Ubiquitination Pathway                                       | 5.13E-01 | 7.9E-02  | RAC2, RRA52, TUBA8, TNFRSF1A, MAPT, RAC1, TUBA8A, PIK3R5, PLCB1, PRK01                                                                                                                           |
| Fcε Receptor Signaling                                               | 5.12E-01 | 8.74E-02 | SHC1, RAC2, RRA52, EIF4A1, RAC1, PIK3R5, EIF2AK2, EIF4E                                                                                                                                          |
| 14-3-3-mediated Signaling                                            | 5.06E-01 | 8.77E-02 | PRKAR2B, RRA52, PAK6, MAP3K8, RAC1, PLCB1, MAP3K8, NFKB2, ADCY7, PRKD1, EGFR                                                                                                                     |
| EIF2 Signaling                                                       | 5.04E-01 | 8E-02    | ENPP3, CILP, DUSP18                                                                                                                                                                              |
| GHRH Signaling                                                       | 5.02E-01 | 7.64E-02 | PPP1R14C, GNG11, PRKAR2B, ADRB1, PDE7A, PPP1R3C, PPP1R14A, PKIA, PDE4B, ADCY7, PDE4D                                                                                                             |
| Riboflavin Metabolism                                                | 4.96E-01 | 5.45E-02 | RAC2, RHOC, RAC1, PIK3R5, MYC, SHC1, IGF2, RRA52, IGF1, CDKN1A, PLCB1, WNT5A, EGFR                                                                                                               |
| Cardiac β-adrenergic Signaling                                       | 4.88E-01 | 7.75E-02 | TMEM87B, CXCL10, RAC2, RRA52, PLA2G5, RAC1, CCL5                                                                                                                                                 |
| Glucocorticoid Metabolism                                            | 4.83E-01 | 7.98E-02 | PPP1R14C, GCH1, PRKAR2B, COMT, PPP1R3C, PPP1R14A, ADCY7                                                                                                                                          |
| Role of MAPK Signaling in the Pathogenesis of Influenza              | 4.77E-01 | 9.33E-02 | NFKBIA, NFKBIE, NFKB2, NFKBIB                                                                                                                                                                    |
| Dopamine Receptor Signaling                                          | 4.77E-01 | 7.53E-02 | LIFR, SHC1, RAC2, RRA52, RAC1, PIK3R5, STAT3, JAK2, SMAD1, WNT5A                                                                                                                                 |
| Aβ1 Mediated Signaling                                               | 4.71E-01 | 9.52E-02 | RAC2, RRA52, PAK6, RAC1, PIK3R5, ACTG2 (includes EG-72), CAPN10, EGFR                                                                                                                            |
| Role of NANOG in Mammalian Embryonic Stem Cell Pluripotency          | 4.64E-01 | 8.77E-02 | RAC2, CAMK1D, RHOC, RAC1, PIK3R5, NFKB2, MYL7, MYL9 (includes EG-98932), SHC1, GNG11, RRA52, PLCB1, GNA13, ADCY7, PRKD1, EGFR                                                                    |
| FAK Signaling                                                        | 4.56E-01 | 8E-02    | UBD, RAC2, GADD45B, RRA52, GADD45G, CDKN1A, RAC1, PIK3R5, HDAC9 (includes EG-9734), CHEK2                                                                                                        |
| Androgen Signaling                                                   | 4.5E-01  | 6.94E-02 | GCH1, CILP                                                                                                                                                                                       |
| Thrombin Signaling                                                   | 4.38E-01 | 7.94E-02 | GNG11, FCER1G, CCL5, FAS, PRKD1, CALM1                                                                                                                                                           |
| Hereditary Breast Cancer Signaling                                   | 4.37E-01 | 7.75E-02 | ITGB2, APOE, MAPT, HCK, PIK3R5, LRP8, ITGB3                                                                                                                                                      |
| Folate Biosynthesis                                                  | 4.36E-01 | 2.5E-02  | MYC, SHC1, RAC2, RRA52, RAC1, ERHRF1, PRKD1, EGFR                                                                                                                                                |
| CD38 Signaling in Macrophages                                        | 4.32E-01 | 6.45E-02 | NFKBIA, NFKBIE, NFKB2, NFKBIB                                                                                                                                                                    |
| Reelin Signaling in Neurons                                          | 4.28E-01 | 8.97E-02 | IQGAP2, RRA52, PAK6, CD44, RAC1, PIK3R5, SH3RF1, NFKB2, ANK1                                                                                                                                     |
| Neuregulin Signaling                                                 | 4.28E-01 | 7.77E-02 | IQGAP2, RRA52, PAK6, CD44, RAC1, PIK3R5, SH3RF1, NFKB2, ANK1                                                                                                                                     |
| B Cell Activating Factor Signaling                                   | 4.25E-01 | 9.09E-02 | MYC, RAC2, RRA52, RAC1, PIK3R5                                                                                                                                                                   |
| Rac Signaling                                                        | 4.25E-01 | 7.38E-02 | RAC2, PRKAR2B, MAPT, RAC1, CAPN10                                                                                                                                                                |
| Endometrial Cancer Signaling                                         | 4.19E-01 | 8.77E-02 | STES1A, ST3GAL1, CH13L3                                                                                                                                                                          |
| Artycol Processing                                                   | 4.19E-01 | 8.47E-02 | MGST1, CYP2E1, CYP4B1, ADH1C (includes EG-126), CYP2B6, MEST, ALDH3A1, CYP1B1                                                                                                                    |
| Glycosphingolipid Biosynthesis - Globoseries                         | 4.13E-01 | 6.67E-02 | TMEM87B, CYP2E1, CYP4B1, PLA2G5, CYP2B6, CYP1B1, FADS3                                                                                                                                           |
| Metabolism of Xenobiotics by Cytochrome P450                         | 3.98E-01 | 3.89E-02 | PPP1R14C, GNG11, PRKAR2B, ADRB1, PDE7A, PPP1R3C, PPP1R14A, PKIA, PDE4B, ADCY7, PDE4D                                                                                                             |
| Lipoic Acid Metabolism                                               | 3.94E-01 | 5.76E-02 | RAC2, RHOC, RAC1, PIK3R5, MYC, SHC1, IGF2, RRA52, IGF1, CDKN1A, PLCB1, WNT5A, EGFR                                                                                                               |
| Fructose and Mannose Metabolism                                      | 3.83E-01 | 3.45E-02 | PKRFB3, KHK, FBP1, DUSP18, PFKFB2                                                                                                                                                                |
| Xenobiotic Metabolism Signaling                                      | 3.82E-01 | 6.87E-02 | SRG1, MGST1, MAP3K8, CAMK1D, NQO2, PIK3R5, IL6, NFKB2, CEB1 (includes EG-1066), CYP1B1, HMOX1, RRA52, SULT1A1, MAP3K8, CYP2B6, ABCG3, ALDH3A1, NFE2L2, PRKD1, PPARGC1A                           |
| Regulation of αIF4 and p70S6K Signaling                              | 3.75E-01 | 6.82E-02 | EIF1AY, SHC1, RAC2, RRA52, EIF4A1, RAC1, PIK3R5, EIF4E, EIF4EBP1                                                                                                                                 |
| Glyoxylate and Dicarboxylate Metabolism                              | 3.72E-01 | 1.71E-02 | MTFHD2, MDH1                                                                                                                                                                                     |
| Phenylalanine, Tyrosine and Tryptophan Biosynthesis                  | 3.72E-01 | 2.99E-02 | PKM, TOR3A                                                                                                                                                                                       |
| Biosynthesis of Steroids                                             | 3.67E-01 | 2.94E-02 | CYP7B1, NQO2, FADS3                                                                                                                                                                              |
| Regulation of Actin-based Motility by Rho                            | 3.57E-01 | 7.61E-02 | MYL9 (includes EG-98932), RAC2, PAK6, RHOC, RAC1, ACTG2 (includes EG-72), MYL7                                                                                                                   |
| Regulation of IL-2 Expression in Activated and Anergic T Lymphocytes | 3.57E-01 | 7.78E-02 | RRA52, NFKBIA, NFKBIE, RAC1, NFKB2, NFKBIB, CALM1                                                                                                                                                |
| Germ Cell-Sertoli Cell Junction Signaling                            | 3.51E-01 | 7.59E-02 | RAC2, RRA52, TUBA8, PAK6, MAP3K8, TNFRSF1A, RHOC, RAC1, TUBA8A, PIK3R5, MAP3K8, ACTG2 (includes EG-72)                                                                                           |
| G Protein Signaling                                                  | 3.46E-01 | 7.21E-02 | PPP1R14C, HES1T1HC, PDE7A, NFKBIE, PPP1R3C, PPP1R14A, NFKB2, PDE4B, PDE4D, HSF3C, MYL7, MYL9 (includes EG-98932), GNG11, PRKAR2B, NFKBIA, RYR3, HLA-B, PLCB1, GNA13, NFKBIB, ADCY7, PRKD1, CALM1 |
| Glutamate Receptor Signaling                                         | 3.38E-01 | 7.14E-02 | GNG11, HOMER2, GULL, HOMER1, CALM1                                                                                                                                                               |
| Pyrimidine Metabolism                                                | 3.32E-01 | 5.19E-02 | ENPP3, APOBEC1, CMPK2, MAD2L2, ENTPD5, UPP1, CTPS2, PNP, AK3L1, UCK2, UNG, CTPS                                                                                                                  |
| CCR3 Signaling in Eosinophils                                        | 3.29E-01 | 7.5E-02  | GNG11, RRA52, PAK6, PLA2G5, RAC1, PIK3R5, PLCB1, PRKD1, CALM1                                                                                                                                    |
| Synaptic Long-Term Depression                                        | 3.28E-01 | 6.89E-02 | MYC, RAC2, RRA52, IGF1, GUCY1A3, RYR3, PLA2G5, PLCB1, GNA13, ADCY7, GUCY1B3, PRKD1                                                                                                               |
| Glycosphingolipid Biosynthesis - Ganglioseries                       | 3.25E-01 | 4.69E-02 | STES1A, ST3GAL1, CH13L3                                                                                                                                                                          |
| G Protein Signaling Mediated by Ltbby                                | 3.25E-01 | 7.32E-02 | GNG11, PLCB1, JAK2                                                                                                                                                                               |
| Nucleotide Excision Repair Pathway                                   | 3.25E-01 | 8.57E-02 | CCNH, RPA3, ERCC1                                                                                                                                                                                |
| PKX Signaling                                                        | 3.2E-01  | 6.73E-02 | RSA2D                                                                                                                                                                                            |
| Role of Lipids/Lipid Rafts in the Pathogenesis of Influenza          | 3.15E-01 | 3.33E-02 | RAC2, SYK, RAC1, PIK3R5, FCER1G, JAK2, LCP2                                                                                                                                                      |
| CTLA4 Signaling in Cytotoxic T Lymphocytes                           | 3.08E-01 | 7.14E-02 | TMEM87B, HMOX1, LPN1, PLA2G5, SPHK1, PLCB1, LPN3                                                                                                                                                 |
| Phospholipid Degradation                                             | 3.08E-01 | 6.67E-02 | PPP1R14C, PRKAR2B, RRA52, PPP1R3C, MAPT, PPP1R14A, ADCY7                                                                                                                                         |
| CDK5 Signaling                                                       | 2.97E-01 | 7.45E-02 | IL1RN, IL6, CSF3                                                                                                                                                                                 |
| Role of Cytokines in Mediating Communication between Immune Cells    | 2.96E-01 | 5.39E-02 | GNG11, PRKAR2B, RRA52, HLA-B, ADCY7, PRKD1, CALM1                                                                                                                                                |
| α-Adrenergic Signaling                                               | 2.75E-01 | 6.6E-02  | CYP7B1, FADS3                                                                                                                                                                                    |
| Stilbene, Coumarin and Lignin Biosynthesis                           | 2.75E-01 | 2.56E-02 | WARS, CYP7B1, CYP2E1, CYP4B1, IDO1, SIAH2, CYP2B6, INMT, ALDH3A1, CYP1B1                                                                                                                         |
| Tryptophan Metabolism                                                | 2.69E-01 | 3.9E-02  | ST3GAL1                                                                                                                                                                                          |
| Glycosphingolipid Biosynthesis - Lactoseries                         | 2.49E-01 | 3.7E-02  | ACTG2 (includes EG-72), CHMP4B, PRK01                                                                                                                                                            |
| Mechanisms of Viral Exit from Host Cells                             | 2.42E-01 | 6.82E-02 | GNG11, GNG12                                                                                                                                                                                     |
| Glycosphingolipid Biosynthesis - Neotactoseries                      | 2.37E-01 | 2.9E-02  | STES1A, GNG12                                                                                                                                                                                    |
| Ascorbate and Aldarate Metabolism                                    | 2.37E-01 | 2.33E-02 | ALDH3A1, FADS3                                                                                                                                                                                   |
| Synthesis and Degradation of Ketone Bodies                           | 2.01E-01 | 5.28E-02 | BDH1                                                                                                                                                                                             |

**TABLE S6** Functional gene groupings sensitive to LPS treatment in WT hearts

| <b>Functional Gene Groupings</b>                     | <b>P-value range</b> | <b>Number of Genes</b> |
|------------------------------------------------------|----------------------|------------------------|
| <b>Molecular and Cellular Functions</b>              |                      |                        |
| Cellular Movement                                    | 4.29E-24 - 4.19E-06  | 246                    |
| Cell Death                                           | 5.11E-20 - 4.24E-06  | 356                    |
| Cell-To-Cell Signalling and Interaction              | 3.06E-17 - 3.19E-06  | 245                    |
| Cellular development                                 | 3.97E-16 - 4.19E-06  | 321                    |
| Cellular growth and proliferation                    | 1.21E-14 - 3.74E-06  | 360                    |
| <b>Physiological System Development and Function</b> |                      |                        |
| Haematological system development/function           | 8.17E-24 - 4.19E-06  | 258                    |
| Immune cell trafficking                              | 8.17E-24 - 4.18E-06  | 175                    |
| Haematopoiesis                                       | 3.25E-21 - 4.19E-06  | 161                    |
| Tissue Development                                   | 2.00E-19 - 2.16E-06  | 158                    |
| Tissue Morphology                                    | 2.73E-19 - 2.43E-06  | 177                    |
| Tissue Morphology                                    | 2.73E-19 - 2.43E-06  | 177                    |
| <b>Disease and Disorders</b>                         |                      |                        |
| Cancer                                               | 9.92E-27 - 2.44E-06  | 407                    |
| Inflammatory response                                | 4.44E-21 - 4.18E-06  | 246                    |
| Skeletal and muscular disorders                      | 1.60E-17 - 1.68E-06  | 355                    |
| Immunological Disease                                | 3.04E-17 - 7.13E-09  | 320                    |
| Organismal Injury and Abnormalities                  | 4.58E-15 - 3.06E-06  | 130                    |
| Tissue Morphology                                    | 2.73E-19 - 2.43E-06  | 177                    |
| <b>Cardiac Toxicological Functions</b>               |                      |                        |
| Cardiac Infarction                                   | 1.62E-09             | 28                     |
| Cardiac Dysfunction                                  | 1.95E-05 - 1.05E-01  | 12                     |
| Cardiac Hypertrophy                                  | 2.26E-05 - 3.37E-01  | 46                     |
| Cardiac Arteriopathy                                 | 5.36E-04             | 122                    |
| Cardiac Necrosis/Cell Death                          | 8.93E-04 - 5.25E-01  | 22                     |
| Tachycardia                                          | 1.88E-03 - 1.53E-01  | 7                      |
| Cardiac Damage                                       | 3.60E-03 - 2.82E-01  | 11                     |
| Cardiac Fibrosis                                     | 8.63E-03 - 1.77E-02  | 14                     |
| Cardiac Congestive Cardiac Failure                   | 1.01E-02             | 11                     |
| Heart Failure                                        | 1.01E-02 - 4.40E-01  | 21                     |
| Cardiac Arrhythmia                                   | 2.07E-02 - 1.00E00   | 5                      |
| Cardiac Output                                       | 2.07E-02 - 3.39E-02  | 4                      |
| Cardiac Degeneration                                 | 7.94E-02             | 1                      |
| Cardiac Stenosis                                     | 9.39E-02             | 6                      |
| Cardiac Inflammation                                 | 9.41E-02             | 3                      |
| Cardiac Dilatation                                   | 1.13E-01             | 6                      |
| Congenital Heart Anomaly                             | 1.11E-01             | 3                      |
| Bradycardia                                          | 5.31E-01             | 2                      |
| Cardiac Enlargement                                  | 2.20E-01             | 1                      |
| Cardiac Transformation                               | 2.82E-01             | 1                      |
| Cardiac Hypoplasia                                   | 4.84E-01             | 1                      |
| Cardiac Proliferation                                | 5.79E-01             | 2                      |

Functional groupings of cardiac transcripts differentially modified at 24 hrs of LPS treatment. Also shown are P-values, and total numbers of involved genes. Functional groups are categorized into molecular and cellular functions, physiological system development and function, disease and disorders, and cardiac toxicological functions, and ranked according to P-value ranges determined by a Fisher's Exact Test. Also shown are the total numbers of genes involved.





















**TABLE S8: Toxicological functions altered by LPS**

| Category                  | Function                                   | Function Annotation                             | P-value  | Molecules                                                                                                                                                                                                    | # of Molecules |
|---------------------------|--------------------------------------------|-------------------------------------------------|----------|--------------------------------------------------------------------------------------------------------------------------------------------------------------------------------------------------------------|----------------|
| Cardiac Infarction        | myocardial infarction                      | myocardial infarction                           | 1.62E-09 | ACTG2 (includes EG-72), ADIPOQ, ADRB1, APOE, CCL13, CD14, CD47, CSF1, CSF3, CXCL12, CXCR4, GUCY1A3, GUCY1B3, IL6, IL1RN, ITGAM, ITGB2, ITGB3, LRP8, P2RY1, PDE4B, PDE4D, PON1, POSTN, RAC1, SELP, TLR2, TSPO | 28             |
| Cardiac Infarction        | myocardial infarction                      | myocardial infarction of mammalia               | 6.40E-02 | ADIPOQ, APOE, IL1RN                                                                                                                                                                                          | 3              |
| Cardiac Infarction        | myocardial infarction                      | myocardial infarction of humans                 | 3.39E-01 | ADIPOQ                                                                                                                                                                                                       | 1              |
| Cardiac Infarction        | myocardial infarction                      | myocardial infarction of mice                   | 3.91E-01 | APOE                                                                                                                                                                                                         | 1              |
| Cardiac Infarction        | acute myocardial infarction                | acute myocardial infarction                     | 1.97E-03 | CSF3, CXCL12, IL6, P2RY1, PON1, POSTN, SELP, TLR2, TSPO                                                                                                                                                      | 9              |
| Cardiac Infarction        | infarction                                 | infarction of myocardium                        | 7.94E-02 | CSF1                                                                                                                                                                                                         | 1              |
| Cardiac Infarction        | infarction                                 | infarction of heart                             | 4.40E-01 | BCL2L1                                                                                                                                                                                                       | 1              |
| Liver Necrosis/Cell Death | cell death                                 | cell death of liver cells                       | 1.07E-07 | ADIPOQ, APOE, BAK1, BCL2L1, BID, CD274, CDKN1A, CEBPB, DAXX, DDIT3, EGFR, FAS, FGL2, GADD45B, HMOX1, IGF1, IL6, ITGB2, ITGB3, MYC, MYD88, NCF1, SOCS3, TBK1, TIMP1, TNFRSF1A, TNFSF10, TNIP1                 | 28             |
| Liver Necrosis/Cell Death | cell death                                 | cell death of hepatocytes                       | 4.71E-04 | BAK1, BID, CDKN1A, DAXX, DDIT3, EGFR, FAS, FGL2, GADD45B, HMOX1, IL6, MYC, MYD88, NCF1, TNFRSF1A, TNFSF10                                                                                                    | 16             |
| Liver Necrosis/Cell Death | cell death                                 | cell death of liver                             | 8.01E-02 | CD14, FAS, MT1E, MT1F                                                                                                                                                                                        | 4              |
| Liver Necrosis/Cell Death | cell death                                 | delay in cell death of hepatocytes              | 1.53E-01 | FAS                                                                                                                                                                                                          | 1              |
| Liver Necrosis/Cell Death | apoptosis                                  | apoptosis of liver cells                        | 9.49E-07 | ADIPOQ, BAK1, BCL2L1, BID, CD274, CDKN1A, CEBPB, DAXX, EGFR, FAS, GADD45B, IL6, ITGB3, MYC, MYD88, NCF1, SOCS3, TBK1, TIMP1, TNFRSF1A, TNFSF10, TNIP1                                                        | 22             |
| Liver Necrosis/Cell Death | apoptosis                                  | apoptosis of hepatocytes                        | 5.99E-04 | ADIPOQ, CEBPB, ITGB3, TIMP1                                                                                                                                                                                  | 13             |
| Liver Necrosis/Cell Death | apoptosis                                  | apoptosis of hepatic stellate cells             | 1.14E-03 | ADIPOQ, CEBPB, ITGB3, TIMP1                                                                                                                                                                                  | 4              |
| Liver Necrosis/Cell Death | apoptosis                                  | apoptosis of sinusoidal endothelial cells       | 7.94E-02 | FAS                                                                                                                                                                                                          | 1              |
| Liver Necrosis/Cell Death | apoptosis                                  | apoptosis of liver                              | 2.82E-01 | FAS                                                                                                                                                                                                          | 1              |
| Liver Necrosis/Cell Death | necrosis                                   | necrosis of liver cells                         | 2.63E-03 | APOE, FAS, FGL2, IGF1, ITGB2, SOCS3, TNFRSF1A                                                                                                                                                                | 7              |
| Liver Necrosis/Cell Death | necrosis                                   | necrosis of hepatocytes                         | 1.56E-01 | FAS, FGL2                                                                                                                                                                                                    | 2              |
| Liver Necrosis/Cell Death | necrosis                                   | necrosis of liver                               | 1.68E-01 | CD14, MT1E, MT1F                                                                                                                                                                                             | 3              |
| Liver Damage              | damage                                     | damage of liver                                 | 1.14E-07 | C3, CBLB, CCL13, CD44, CDKN1A, CXCL1, CXCL10, FAS, HCK, IL6, ITGB2, MT1E, MT1F, MYD88, NCF1, NFE2L2, SAA2, SDC4, STAT1, TLR2, TLR3, TNFRSF1A, TNFSF10                                                        | 23             |
| Liver Damage              | damage                                     | damage of liver cells                           | 3.93E-02 | IL1RN, IRF1, TNFRSF1A                                                                                                                                                                                        | 3              |
| Liver Damage              | damage                                     | damage of hepatocytes                           | 7.63E-02 | IL1RN, IRF1                                                                                                                                                                                                  | 2              |
| Liver Damage              | injury                                     | injury of liver                                 | 1.39E-06 | CCL13, CDKN1A, CXCL1, CXCL10, FAS, IL6, ITGB2, MYD88, NCF1, SAA2, SDC4, STAT1, TLR2, TLR3, TNFRSF1A                                                                                                          | 15             |
| Liver Damage              | injury                                     | injury of hepatocytes                           | 1.53E-01 | IRF1                                                                                                                                                                                                         | 1              |
| Renal Nephritis           | nephritis                                  | nephritis                                       | 8.29E-07 | C4A, CCL5, CCL13, CCR1, CDKN1A, CXCL16, FAS, FCGR2B, ICAM1, IL1RN, NFE2L2, NFKB2, NFKBIA, NR3C1, PDE4B, PDE4D, PDE5A, PDE7A, SELP, TGM2, TLR2, TLR3, TNFRSF1A, TRAF3IP2, VCAM1, VEGFA                        | 26             |
| Renal Nephritis           | nephritis                                  | nephritis of animal                             | 3.49E-04 | C4A, CCR1, CDKN1A, FAS, FCGR2B, IL1RN, NFE2L2, NFKB2, NFKBIA, TGM2, TLR2, TLR3, TRAF3IP2                                                                                                                     | 13             |
| Renal Nephritis           | nephritis                                  | nephritis of rodents                            | 2.20E-03 | C4A, CCR1, CDKN1A, FAS, FCGR2B, IL1RN, NFE2L2, NFKB2, NFKBIA, TGM2, TRAF3IP2                                                                                                                                 | 11             |
| Renal Nephritis           | nephritis                                  | nephritis of mice                               | 4.52E-03 | C4A, CCR1, CDKN1A, FAS, FCGR2B, NFE2L2, NFKB2, NFKBIA, TGM2, TRAF3IP2                                                                                                                                        | 10             |
| Renal Nephritis           | glomerulonephritis                         | glomerulonephritis                              | 4.42E-06 | C4A, CCL5, CCL13, CCR1, CDKN1A, CXCL16, FAS, FCGR2B, ICAM1, IL1RN, NFE2L2, NFKBIA, NR3C1, PDE4B, PDE4D, PDE5A, PDE7A, SELP, TLR3, TNFRSF1A, TRAF3IP2, VCAM1, VEGFA                                           | 23             |
| Renal Nephritis           | glomerulonephritis                         | glomerulonephritis of animal                    | 6.09E-03 | C4A, CCR1, CDKN1A, FAS, FCGR2B, IL1RN, NFE2L2, NFKBIA, TRAF3IP2                                                                                                                                              | 10             |
| Renal Nephritis           | glomerulonephritis                         | glomerulonephritis of rodents                   | 1.39E-02 | C4A, CCR1, CDKN1A, FAS, FCGR2B, IL1RN, NFE2L2, NFKBIA, TRAF3IP2                                                                                                                                              | 9              |
| Renal Nephritis           | glomerulonephritis                         | glomerulonephritis of mice                      | 2.69E-02 | C4A, CCR1, CDKN1A, FAS, FCGR2B, IL1RN, NFE2L2, NFKBIA, TRAF3IP2                                                                                                                                              | 8              |
| Renal Nephritis           | glomerulonephritis                         | glomerulonephritis of rats                      | 3.39E-01 | IL1RN                                                                                                                                                                                                        | 1              |
| Renal Nephritis           | glomerulonephritis                         | glomerulonephritis of kidney                    | 3.91E-01 | VEGFA                                                                                                                                                                                                        | 1              |
| Renal Nephritis           | immune complex nephritis                   | immune complex nephritis of organism            | 5.21E-04 | IL1RN, NFKB2, TGM2, TLR2                                                                                                                                                                                     | 4              |
| Renal Nephritis           | immune complex nephritis                   | immune complex nephritis of animal              | 4.42E-03 | NFKB2, TGM2, TLR2                                                                                                                                                                                            | 4              |
| Renal Nephritis           | immune complex nephritis                   | immune complex nephritis of mice                | 6.30E-03 | NFKB2, TGM2                                                                                                                                                                                                  | 2              |
| Renal Nephritis           | lupus nephritis                            | lupus nephritis                                 | 4.22E-03 | CXCL16, FAS, FCGR2B, NR3C1, SELP, TNFRSF1A, VCAM1                                                                                                                                                            | 7              |
| Renal Nephritis           | lupus nephritis                            | lupus nephritis of mice                         | 2.46E-01 | FAS, FCGR2B                                                                                                                                                                                                  | 2              |
| Renal Nephritis           | experimental crescentic glomerulonephritis | experimental crescentic glomerulonephritis      | 3.39E-02 | IL1RN, VEGFA                                                                                                                                                                                                 | 2              |
| Renal Nephritis           | focal glomerulonephritis                   | focal glomerulonephritis                        | 5.98E-01 | NR3C1                                                                                                                                                                                                        | 1              |
| Liver Inflammation        | inflammation                               | inflammation of liver                           | 1.00E-05 | ADIPOQ, CD14, CXCL2, CXCL3, DARC, FAS, HP, IL1RN, ITGB2, NFKB1B, TNFRSF1A                                                                                                                                    | 11             |
| Renal Proliferation       | proliferation                              | proliferation of mesangial cells                | 1.00E-05 | APOE, CXCL9, CXCL10, EGFR, FCER1G, FPR2, IGF1, IGF2, IL6, PLAUR, STAT3                                                                                                                                       | 11             |
| Renal Proliferation       | proliferation                              | proliferation of kidney cells                   | 3.07E-05 | APOE, CXCL9, CXCL10, EGFR, FCER1G, FPR2, IGF1, IGF2, IL6, LCN2, PLAUR, STAT3                                                                                                                                 | 12             |
| Renal Proliferation       | proliferation                              | proliferation of renal tubular epithelial cells | 2.82E-01 | LCN2                                                                                                                                                                                                         | 1              |
| Renal Damage              | damage                                     | damage of renal tubule                          | 1.11E-05 | BID, CCL13, CSF1, CSF3, ICAM1, LCN2, MYD88, TLR2                                                                                                                                                             | 8              |
| Renal Damage              | damage                                     | damage of kidney                                | 2.26E-05 | C3, C4A, CCL13, CFB, FAH, FAS, FCGR1A, HCK, IGF1, IL6, ITGB6, MYD88, SELP, TLR2                                                                                                                              | 14             |
| Renal Damage              | damage                                     | damage of tubulointerstitium                    | 2.82E-01 | APOE                                                                                                                                                                                                         | 1              |
| Renal Damage              | injury                                     | injury of kidney                                | 1.54E-03 | CFB, FCGR1A, IGF1, IL6, ITGB6, MYD88, TLR2                                                                                                                                                                   | 7              |
| Renal Damage              | injury                                     | injury of kidney cells                          | 6.30E-03 | C3, ICAM1                                                                                                                                                                                                    | 2              |
| Renal Damage              | injury                                     | injury of renal tubule                          | 7.63E-02 | CCL13, TLR2                                                                                                                                                                                                  | 2              |
| Renal Damage              | injury                                     | injury of podocytes                             | 7.94E-02 | C3                                                                                                                                                                                                           | 3              |
| Renal Damage              | injury                                     | injury of tubular cells                         | 7.94E-02 | ICAM1                                                                                                                                                                                                        | 1              |
| Renal Tubule Injury       | damage                                     | damage of renal tubule                          | 1.11E-05 | BID, CCL13, CSF1, CSF3, ICAM1, LCN2, MYD88, TLR2                                                                                                                                                             | 8              |
| Renal Tubule Injury       | damage                                     | damage of tubulointerstitium                    | 2.82E-01 | APOE                                                                                                                                                                                                         | 1              |
| Renal Tubule Injury       | proximal tubular toxicity                  | proximal tubular toxicity                       | 1.01E-02 | BTG2, CD24, CP, CTSS, CXCR4, CYP2E1, HSPB1, IGF1, IGFBP5, JUNB, LGALS3, SLC38A3, SULT1A1, TIMP1                                                                                                              | 14             |
| Renal Tubule Injury       | injury                                     | injury of renal tubule                          | 7.63E-02 | CCL13, TLR2                                                                                                                                                                                                  | 2              |
| Renal Tubule Injury       | injury                                     | injury of tubular cells                         | 7.94E-02 | ICAM1                                                                                                                                                                                                        | 1              |
| Cardiac Dysfunction       | dysfunction                                | dysfunction of left ventricle                   | 1.95E-05 | ADRB1, ANGPLT4, CCL13, CSF1, NCF1, PPARGC1A, SERPINE1, TIMP1                                                                                                                                                 | 8              |
| Cardiac Dysfunction       | dysfunction                                | dysfunction of heart                            | 1.05E-01 | APOE, CACNB2, PPARA, SLC2A1                                                                                                                                                                                  | 4              |
| Cardiac Hypertrophy       | hypertrophy                                | hypertrophy of heart ventricle                  | 2.26E-05 | APOE, ATF3, CASQ2, CCL13, CXCL12, EGFR, GUCY1A3, HDAC9 (includes EG-9734), HIF1A, IL6, PBX1, PPARA, PPARGC1A, RCAN1                                                                                          | 14             |
| Cardiac Hypertrophy       | hypertrophy                                | hypertrophy of cardiomyocytes                   | 6.36E-04 | ADRB1, CSF3, FBXO32, FHL2, HDAC9 (includes EG-9734), IER3, IGF1, IL33, KCND2, NCF1, NFKBIA, PLCB1, RRAD, SERPINE1, SHC1, TIMP1, TNFAIP3                                                                      | 17             |
| Cardiac Hypertrophy       | hypertrophy                                | hypertrophy of right ventricle of heart         | 6.62E-04 | APOE, CXCL12, GUCY1A3, HDAC9 (includes EG-9734), IL6, PBX1                                                                                                                                                   | 6              |
| Cardiac Hypertrophy       | hypertrophy                                | hypertrophy of heart cells                      | 4.86E-04 | ADRB1, CSF3, FBXO32, FHL2, HCK, HDAC9 (includes EG-9734), IER3, IGF1, IL33, KCND2, NCF1, NFKBIA, PIM1, PLCB1, RRAD, SERPINE1, SHC1, TCF15, TIMP1, TNFAIP3                                                    | 20             |
| Cardiac Hypertrophy       | hypertrophy                                | hypertrophy of cardiac muscle                   | 3.41E-03 | FBXO32, IGF1, IL6, RAC1, STAT3                                                                                                                                                                               | 5              |
| Cardiac Hypertrophy       | hypertrophy                                | hypertrophy of left ventricle                   | 1.13E-02 | CASQ2, CCL13, EGFR, HDAC9 (includes EG-9734), PBX1, PPARGC1A, RCAN1                                                                                                                                          | 7              |
| Cardiac Hypertrophy       | hypertrophy                                | hypertrophy of heart                            | 2.52E-02 | ACTG2 (includes EG-72), CASQ2, CDKN1A, EGFR, FBXO32, FHL2, HMOX1, LEPR, NR3C2, PNKD (includes EG-25953), POSTN, RAC1, RCAN1, SLC2A4, SMTN                                                                    | 15             |
| Cardiac Hypertrophy       | hypertrophy                                | hypertrophy of myocardium                       | 5.09E-02 | IL6, RAC1, STAT3                                                                                                                                                                                             | 3              |
| Cardiac Hypertrophy       | hypertrophy                                | hypertrophy of ventricular septum               | 7.94E-02 | HDAC9 (includes EG-9734)                                                                                                                                                                                     | 1              |
| Cardiac Hypertrophy       | hypertrophy                                | hypertrophy of ventricular myocardium           | 1.53E-01 | IL6                                                                                                                                                                                                          | 1              |
| Cardiac Hypertrophy       | hypertrophy                                | hypertrophy of atrium                           | 2.20E-01 | ATF3                                                                                                                                                                                                         | 1              |
| Cardiac Hypertrophy       | hypertrophy                                | hypertrophy of ventricular myocytes             | 3.37E-01 | KCND2, PLCB1                                                                                                                                                                                                 | 2              |
| Renal Necrosis/Cell Death | cell death                                 | cell death of tubular cells                     | 1.10E-04 | BID, CASP12 (includes EG-12364), CDKN1A, ICAM1, IGF1, LCN2, MT1F, MYD88, TLR2                                                                                                                                | 9              |
| Renal Necrosis/Cell Death | cell death                                 | cell death of renal tubular epithelial cells    | 2.35E-03 | CASP12 (includes EG-12364), ICAM1, LCN2, MYD88, TLR2                                                                                                                                                         | 5              |
| Renal Necrosis/Cell Death | cell death                                 | cell death of kidney cells                      | 2.58E-03 | APOE, BID, CASP12 (includes EG-12364), CDKN1A, DDIT3, ICAM1, IGF1, LCN2, MT1F, MYD88, TLR2                                                                                                                   | 11             |
| Renal Necrosis/Cell Death | apoptosis                                  | apoptosis of tubular cells                      | 8.42E-04 | BID, CDKN1A, IGF1, LCN2, MT1F, MYD88, TLR2                                                                                                                                                                   | 7              |
| Renal Necrosis/Cell Death | apoptosis                                  | apoptosis of kidney cells                       | 9.20E-03 | APOE, BID, CDKN1A, DDIT3, IGF1, LCN2, MT1F, MYD88, TLR2                                                                                                                                                      | 9              |
| Renal Necrosis/Cell Death | apoptosis                                  | apoptosis of renal tubular epithelial cells     | 5.09E-02 | LCN2, MYD88, TLR2                                                                                                                                                                                            | 3              |
| Renal Necrosis/Cell Death | apoptosis                                  | apoptosis of proximal tubule cells              | 5.36E-02 | CDKN1A, IGF1                                                                                                                                                                                                 | 2              |
| Renal Necrosis/Cell Death | apoptosis                                  | apoptosis of mesangial cells                    | 6.30E-01 | APOE                                                                                                                                                                                                         | 1              |
| Renal Necrosis/Cell Death | necrosis                                   | necrosis of tubular cells                       | 5.36E-02 | CDKN1A, ICAM1                                                                                                                                                                                                | 2              |
| Renal Necrosis/Cell Death | necrosis                                   | necrosis of proximal tubule cells               | 1.53E-01 | CDKN1A                                                                                                                                                                                                       | 1              |
| Renal Necrosis/Cell Death | necrosis                                   | necrosis of renal tubular epithelial cells      | 1.53E-01 | ICAM1                                                                                                                                                                                                        | 1              |
| Kidney Failure            | renal failure                              | renal failure                                   | 1.62E-04 | AR, ATF3, CDKN1A, CFB, CSF3, HMOX1, LCN2, MYD88, NPR3, NR3C1, NR3C2, PDE4B, PDE4D, PDE5A, PDE7A                                                                                                              | 15             |
| Kidney Failure            | renal failure                              | delay in renal failure of mice                  | 7.94E-02 | CFB                                                                                                                                                                                                          | 1              |
| Kidney Failure            | renal failure                              | renal failure of mice                           | 4.52E-01 | CFB, MYD88                                                                                                                                                                                                   | 2              |
| Kidney Failure            | chronic renal failure                      | chronic renal failure                           | 1.46E-03 | AR, CDKN1A, CSF3, NR3C2, PDE4B, PDE4D, PDE5A, PDE7A                                                                                                                                                          | 8              |
| Kidney Failure            | acute renal failure                        | acute renal failure                             | 4.79E-03 | ATF3, HMOX1, LCN2, MYD88, NPR3                                                                                                                                                                               | 5              |
| Kidney Failure            | nephrotic acute renal failure              | nephrotic acute renal failure                   | 6.30E-03 | ATF3, HMOX1                                                                                                                                                                                                  | 2              |
| Kidney Failure            | failure                                    | failure of kidney                               | 3.93E-02 | FCER1G, HMOX1, VEGFA                                                                                                                                                                                         | 3              |
| Liver Proliferation       | proliferation                              | proliferation of liver cells                    | 1.72E-04 | ADIPOQ, C3, CDKN1A, CEBPB, CXCL3, CXCL12, IGF1, IL6, ITGB3, KITLG, LGALS3, MYC, PML, SOCS3, STAT1, TNFRSF1A, XDH                                                                                             | 17             |
| Liver Proliferation       | proliferation                              | proliferation of hepatic stellate cells         | 6.62E-04 | ADIPOQ, IGF1, ITGB3, LGALS3, STAT1, XDH                                                                                                                                                                      | 6              |
| Liver Proliferation       | proliferation                              | proliferation of hepatocytes                    | 8.94E-03 | C3, CDKN1A, CEBPB, CXCL3, IGF1, IL6, KITLG, MYC, PML, SOCS3, TNFRSF1A                                                                                                                                        | 11             |
| Liver Proliferation       | proliferation                              | proliferation of liver                          | 2.20E-01 | CEBPB                                                                                                                                                                                                        | 1              |
| Liver Hepatitis           | hepatitis                                  | hepatitis                                       | 1.92E-04 | ADIPOQ, BCL2L1, BID, CD14, CD44, CD274, CYP2E1, FAS, IL6, NFE2L2, PDE4B, PDE4D, PDE5A, PDE7A, PPARA, TIMP1, TLR3, TNFRSF1A, TNFSF10                                                                          | 19             |
| Liver Hepatitis           | hepatitis                                  | hepatitis of mice                               | 3.59E-04 | BCL2L1, BID, CD44, FAS, IL6, NFE2L2, PPARA, TLR3, TNFRSF1A, TNFSF10                                                                                                                                          | 10             |
| Liver Hepatitis           | steatohepatitis                            | steatohepatitis                                 | 8.16E-04 | ADIPOQ, CD14, CYP2E1, PDE4B, PDE4D, PDE5A, PDE7A, PPARA, TNFRSF1A                                                                                                                                            | 9              |
| Liver Hepatitis           | steatohepatitis                            | steatohepatitis of liver                        | 2.82E-01 | CD14                                                                                                                                                                                                         | 1              |
| Liver Hepatitis           | steatohepatitis                            | steatohepatitis of mice                         | 4.40E-01 | PPARA                                                                                                                                                                                                        | 1              |
| Liver Hepatitis           | nonalcoholic steatohepatitis               | nonalcoholic steatohepatitis                    | 1.15E-03 | ADIPOQ, CYP2E1, PDE4B, PDE4D, PDE5A, PDE7A, TNFRSF1A                                                                                                                                                         | 7              |
| Liver Hepatitis           | fulminant hepatitis                        | fulminant hepatitis of mice                     | 2.92E-02 | BCL2L1, BID, FAS                                                                                                                                                                                             | 3              |
| Liver Hepatitis           | chronic hepatitis B                        | chronic hepatitis B                             | 3.93E-02 | CD274, IL6, TIMP1                                                                                                                                                                                            | 3              |
| Liver Hepatitis           | necroinflammatory liver disease            | necroinflammatory liver disease                 | 7.94E-02 | ADIPOQ                                                                                                                                                                                                       | 1              |

|                                     |                                         |                                                  |          |                                                                                                                                                                                                                                                                                                                                                                                                                                                                                                                                                                                                                                                                                                                                                                                                                                                                                                                                                                                                           |     |
|-------------------------------------|-----------------------------------------|--------------------------------------------------|----------|-----------------------------------------------------------------------------------------------------------------------------------------------------------------------------------------------------------------------------------------------------------------------------------------------------------------------------------------------------------------------------------------------------------------------------------------------------------------------------------------------------------------------------------------------------------------------------------------------------------------------------------------------------------------------------------------------------------------------------------------------------------------------------------------------------------------------------------------------------------------------------------------------------------------------------------------------------------------------------------------------------------|-----|
| Liver Hepatitis                     | alcoholic hepatitis                     | alcoholic hepatitis                              | 1.01E-01 | IL6, TNFRSF1A                                                                                                                                                                                                                                                                                                                                                                                                                                                                                                                                                                                                                                                                                                                                                                                                                                                                                                                                                                                             | 2   |
| Liver Hepatitis                     | acute hepatitis                         | acute hepatitis of mice                          | 1.53E-01 | CD44                                                                                                                                                                                                                                                                                                                                                                                                                                                                                                                                                                                                                                                                                                                                                                                                                                                                                                                                                                                                      | 1   |
| Liver Hepatitis                     | chronic autoimmune hepatitis            | chronic autoimmune hepatitis                     | 1.53E-01 | TLR3                                                                                                                                                                                                                                                                                                                                                                                                                                                                                                                                                                                                                                                                                                                                                                                                                                                                                                                                                                                                      | 1   |
| Liver Hepatitis                     | chronic hepatitis                       | chronic hepatitis of mice                        | 1.53E-01 | TLR3                                                                                                                                                                                                                                                                                                                                                                                                                                                                                                                                                                                                                                                                                                                                                                                                                                                                                                                                                                                                      | 1   |
| Liver Hepatitis                     | chronic hepatitis                       | chronic hepatitis                                | 4.31E-01 | CD274, IL6, TIMP1, TLR3                                                                                                                                                                                                                                                                                                                                                                                                                                                                                                                                                                                                                                                                                                                                                                                                                                                                                                                                                                                   | 4   |
| Liver Hepatitis                     | experimental hepatitis                  | experimental hepatitis of mice                   | 4.40E-01 | FAS                                                                                                                                                                                                                                                                                                                                                                                                                                                                                                                                                                                                                                                                                                                                                                                                                                                                                                                                                                                                       | 1   |
| Liver Hemorrhaging                  | bleeding                                | bleeding of liver                                | 5.00E-04 | FAS, MT1E, MT1F                                                                                                                                                                                                                                                                                                                                                                                                                                                                                                                                                                                                                                                                                                                                                                                                                                                                                                                                                                                           | 3   |
| Cardiac Arteriopathy                | coronary artery disease                 | coronary artery disease                          | 5.36E-04 | ADAM9, AFF3, AMN1, ANK1, ANO4, ANXA4, APLNR, APOE, ARHGAP20, ARSB, ASB2, AUST2 (includes EG-26053), BACH2 (includes EG-60468), C10ORF107, CACNB2, CD14, CD47, CHEK2, CLIC5, COLEC12, COMT, CPEB3, DAAM1, DTNA, EEPD1, EFN2B, EGFR, ENTPD5, EPHB1, ESRRG, FAH, FAM40B, FGF12, FNDC1, GALM, GLIPR2, GOLSYN, GPC6, GPM6A, GRHL1, GRK5, GUCY1A3, GUCY1B3, HDAC9 (includes EG-9734), ICAM1, IL6, IL33, IL17RA, IQGAP2, ITGA8 (includes EG-8516), ITGAM, ITGB2, ITGB3, ITIH5, KIAA1217, LAMA2, LBP, LEPR, LIFR, LRRC17, MAG3, MAMDC2, MAN2A1, MATN2, MSR1, MTRM14, MYH11, NEBL, NFIA, NHERF1, NFR3, NR3C1, NR3C2, NTM, P2RY1, PAH, PBX1, PDE4B, PDE4D, PDE5A, PDE7A, PHACTR1, PLA2G5, PLA2G7, PLCB1, PLXDC2, PNKD (includes EG-25953), PON1, POSTN, PPARA, PPARGC1A, PRICKLE1, PSMF1, PTPRD, PTPRE, QSOX1, RAPH1, REG3G, RPS6KA2, RPS6KA5, RYR3, SCN7A, SELE, SELP, SEMA3C, SEMA3F, SEMA5A, SERPINE1, SHROOM3, SLC22A3, SPON1, ST3GAL1, SYK, SYNPO2, TACC2, TMEM163, TNFAIP6, TRDN, TRIM5, TUBA8, VEGFA, ZNF827 | 122 |
| Liver Steatohepatitis               | steatohepatitis                         | steatohepatitis                                  | 8.16E-04 | ADIPOQ, CD14, CYP2E1, PDE4B, PDE4D, PDE5A, PDE7A, PPARA, TNFRSF1A                                                                                                                                                                                                                                                                                                                                                                                                                                                                                                                                                                                                                                                                                                                                                                                                                                                                                                                                         | 9   |
| Liver Steatohepatitis               | steatohepatitis                         | steatohepatitis of liver                         | 2.82E-01 | CD14                                                                                                                                                                                                                                                                                                                                                                                                                                                                                                                                                                                                                                                                                                                                                                                                                                                                                                                                                                                                      | 1   |
| Liver Steatohepatitis               | steatohepatitis                         | steatohepatitis of mice                          | 4.40E-01 | PPARA                                                                                                                                                                                                                                                                                                                                                                                                                                                                                                                                                                                                                                                                                                                                                                                                                                                                                                                                                                                                     | 1   |
| Liver Steatohepatitis               | nonalcoholic steatohepatitis            | nonalcoholic steatohepatitis                     | 1.15E-03 | ADIPOQ, CYP2E1, PDE4B, PDE4D, PDE5A, PDE7A, TNFRSF1A                                                                                                                                                                                                                                                                                                                                                                                                                                                                                                                                                                                                                                                                                                                                                                                                                                                                                                                                                      | 7   |
| Liver Steatosis                     | steatohepatitis                         | steatohepatitis                                  | 8.16E-04 | ADIPOQ, CD14, CYP2E1, PDE4B, PDE4D, PDE5A, PDE7A, PPARA, TNFRSF1A                                                                                                                                                                                                                                                                                                                                                                                                                                                                                                                                                                                                                                                                                                                                                                                                                                                                                                                                         | 9   |
| Liver Steatosis                     | steatohepatitis                         | steatohepatitis of liver                         | 2.82E-01 | CD14                                                                                                                                                                                                                                                                                                                                                                                                                                                                                                                                                                                                                                                                                                                                                                                                                                                                                                                                                                                                      | 1   |
| Liver Steatosis                     | steatohepatitis                         | steatohepatitis of mice                          | 4.40E-01 | PPARA                                                                                                                                                                                                                                                                                                                                                                                                                                                                                                                                                                                                                                                                                                                                                                                                                                                                                                                                                                                                     | 1   |
| Liver Steatosis                     | nonalcoholic steatohepatitis            | nonalcoholic steatohepatitis                     | 1.15E-03 | ADIPOQ, CYP2E1, PDE4B, PDE4D, PDE5A, PDE7A, TNFRSF1A                                                                                                                                                                                                                                                                                                                                                                                                                                                                                                                                                                                                                                                                                                                                                                                                                                                                                                                                                      | 7   |
| Liver Steatosis                     | hepatic steatosis                       | hepatic steatosis                                | 2.95E-03 | ADIPOQ, APOE, CD14, CYP2E1, EGLN3, LBP, PPARA, PPARGC1B, STEAP2                                                                                                                                                                                                                                                                                                                                                                                                                                                                                                                                                                                                                                                                                                                                                                                                                                                                                                                                           | 15  |
| Liver Steatosis                     | hepatic steatosis                       | hepatic steatosis of mice                        | 5.12E-02 | ADIPOQ, APOE, CYP2E1, EGLN3, LBP, PPARA, PPARGC1B, STEAP2                                                                                                                                                                                                                                                                                                                                                                                                                                                                                                                                                                                                                                                                                                                                                                                                                                                                                                                                                 | 8   |
| Liver Steatosis                     | alcoholic fatty liver disease           | alcoholic fatty liver disease of mice            | 7.94E-02 | ADIPOQ                                                                                                                                                                                                                                                                                                                                                                                                                                                                                                                                                                                                                                                                                                                                                                                                                                                                                                                                                                                                    | 1   |
| Liver Steatosis                     | nonalcoholic fatty liver disease        | nonalcoholic fatty liver disease of mice         | 1.53E-01 | ADIPOQ                                                                                                                                                                                                                                                                                                                                                                                                                                                                                                                                                                                                                                                                                                                                                                                                                                                                                                                                                                                                    | 1   |
| Cardiac Necrosis/Cell Death         | cell death                              | cell death of cardiomyocytes                     | 8.93E-04 | ADIPOQ, ADRB1, BCL2L1, BNIP3 (includes EG-12176), CACNB2, CDKN1A, CSF3, HSPB1, IGF1, IL6, LEPR, NAMPT, PIM1, PPARGC1A, PTN, SOCS3, SPRR1A, STAT1, TIMP2, TNFAIP3, TXNIP                                                                                                                                                                                                                                                                                                                                                                                                                                                                                                                                                                                                                                                                                                                                                                                                                                   | 21  |
| Cardiac Necrosis/Cell Death         | cell death                              | cell death of ventricular myocytes               | 4.52E-01 | CDKN1A, TIMP2                                                                                                                                                                                                                                                                                                                                                                                                                                                                                                                                                                                                                                                                                                                                                                                                                                                                                                                                                                                             | 2   |
| Cardiac Necrosis/Cell Death         | apoptosis                               | apoptosis of cardiomyocytes                      | 5.28E-03 | ADIPOQ, ADRB1, BCL2L1, BNIP3 (includes EG-12176), CSF3, IGF1, IL6, LEPR, NAMPT, PIM1, PPARGC1A, PTN, SOCS3, TIMP2, TNFAIP3, TXNIP                                                                                                                                                                                                                                                                                                                                                                                                                                                                                                                                                                                                                                                                                                                                                                                                                                                                         | 16  |
| Cardiac Necrosis/Cell Death         | apoptosis                               | apoptosis of heart                               | 2.20E-01 | STAT3                                                                                                                                                                                                                                                                                                                                                                                                                                                                                                                                                                                                                                                                                                                                                                                                                                                                                                                                                                                                     | 1   |
| Cardiac Necrosis/Cell Death         | necrosis                                | necrosis of cardiomyocytes                       | 5.25E-01 | CACNB2                                                                                                                                                                                                                                                                                                                                                                                                                                                                                                                                                                                                                                                                                                                                                                                                                                                                                                                                                                                                    | 1   |
| Renal Hypertrophy                   | hypertrophy                             | hypertrophy of renal glomerulus                  | 1.88E-03 | ADIPOQ, ICAM1, LEPR                                                                                                                                                                                                                                                                                                                                                                                                                                                                                                                                                                                                                                                                                                                                                                                                                                                                                                                                                                                       | 3   |
| Renal Hypertrophy                   | hypertrophy                             | hypertrophy of distal tubule                     | 1.53E-01 | HSD11B1                                                                                                                                                                                                                                                                                                                                                                                                                                                                                                                                                                                                                                                                                                                                                                                                                                                                                                                                                                                                   | 1   |
| Renal Thrombosis                    | thrombosis                              | thrombosis of renal glomerulus                   | 1.88E-03 | C2, CFB, TLR2                                                                                                                                                                                                                                                                                                                                                                                                                                                                                                                                                                                                                                                                                                                                                                                                                                                                                                                                                                                             | 3   |
| Tachycardia                         | tachycardia                             | tachycardia of heart ventricle                   | 1.88E-03 | CASQ2, CSF3, KITLG                                                                                                                                                                                                                                                                                                                                                                                                                                                                                                                                                                                                                                                                                                                                                                                                                                                                                                                                                                                        | 3   |
| Tachycardia                         | tachycardia                             | tachycardia                                      | 9.85E-02 | ADRB1, CASQ2, CSF3, KCNK3, KITLG, LCP2, PTGFR                                                                                                                                                                                                                                                                                                                                                                                                                                                                                                                                                                                                                                                                                                                                                                                                                                                                                                                                                             | 7   |
| Tachycardia                         | tachycardia                             | tachycardia of mice                              | 3.39E-01 | PTGFR                                                                                                                                                                                                                                                                                                                                                                                                                                                                                                                                                                                                                                                                                                                                                                                                                                                                                                                                                                                                     | 1   |
| Tachycardia                         | ventricular tachycardia                 | ventricular tachycardia of heart                 | 4.42E-03 | ADRB1, CASQ2, LCP2                                                                                                                                                                                                                                                                                                                                                                                                                                                                                                                                                                                                                                                                                                                                                                                                                                                                                                                                                                                        | 3   |
| Tachycardia                         | ventricular tachycardia                 | ventricular tachycardia                          | 3.38E-01 | ADRB1, CASQ2, KCNK3, LCP2                                                                                                                                                                                                                                                                                                                                                                                                                                                                                                                                                                                                                                                                                                                                                                                                                                                                                                                                                                                 | 4   |
| Tachycardia                         | polymorphic ventricular tachycardia     | polymorphic ventricular tachycardia              | 1.53E-01 | CASQ2                                                                                                                                                                                                                                                                                                                                                                                                                                                                                                                                                                                                                                                                                                                                                                                                                                                                                                                                                                                                     | 1   |
| Cardiac Damage                      | damage                                  | damage of myocardium                             | 3.60E-03 | IGF1, ITGB2, SERPINE1, SERPING1                                                                                                                                                                                                                                                                                                                                                                                                                                                                                                                                                                                                                                                                                                                                                                                                                                                                                                                                                                           | 4   |
| Cardiac Damage                      | damage                                  | damage of heart ventricle                        | 1.79E-02 | PIM1, POSTN                                                                                                                                                                                                                                                                                                                                                                                                                                                                                                                                                                                                                                                                                                                                                                                                                                                                                                                                                                                               | 2   |
| Cardiac Damage                      | damage                                  | damage of heart                                  | 3.74E-02 | ADIPOQ, HMOX1, PRKAA2, SERPINE1, STAT3                                                                                                                                                                                                                                                                                                                                                                                                                                                                                                                                                                                                                                                                                                                                                                                                                                                                                                                                                                    | 5   |
| Cardiac Damage                      | injury                                  | injury of myocardium                             | 1.37E-02 | IGF1, ITGB2, SERPING1                                                                                                                                                                                                                                                                                                                                                                                                                                                                                                                                                                                                                                                                                                                                                                                                                                                                                                                                                                                     | 3   |
| Cardiac Damage                      | injury                                  | injury of heart                                  | 6.40E-02 | ADIPOQ, PRKAA2, STAT3                                                                                                                                                                                                                                                                                                                                                                                                                                                                                                                                                                                                                                                                                                                                                                                                                                                                                                                                                                                     | 3   |
| Cardiac Damage                      | injury                                  | injury of left ventricle                         | 7.94E-02 | PIM1                                                                                                                                                                                                                                                                                                                                                                                                                                                                                                                                                                                                                                                                                                                                                                                                                                                                                                                                                                                                      | 1   |
| Cardiac Damage                      | injury                                  | injury of cardiomyocytes                         | 2.20E-01 | PIM3                                                                                                                                                                                                                                                                                                                                                                                                                                                                                                                                                                                                                                                                                                                                                                                                                                                                                                                                                                                                      | 1   |
| Cardiac Damage                      | rupture                                 | rupture of myocardium                            | 1.53E-01 | SERPINE1                                                                                                                                                                                                                                                                                                                                                                                                                                                                                                                                                                                                                                                                                                                                                                                                                                                                                                                                                                                                  | 1   |
| Cardiac Damage                      | rupture                                 | rupture of heart                                 | 2.82E-01 | SERPINE1                                                                                                                                                                                                                                                                                                                                                                                                                                                                                                                                                                                                                                                                                                                                                                                                                                                                                                                                                                                                  | 1   |
| Liver Hyperplasia/Hyperproliferator | tumorigenesis                           | tumorigenesis of hepatocytes                     | 6.30E-03 | C3, TIMP1                                                                                                                                                                                                                                                                                                                                                                                                                                                                                                                                                                                                                                                                                                                                                                                                                                                                                                                                                                                                 | 2   |
| Liver Hyperplasia/Hyperproliferator | tumorigenesis                           | delay in tumorigenesis of liver                  | 1.53E-01 | MYC                                                                                                                                                                                                                                                                                                                                                                                                                                                                                                                                                                                                                                                                                                                                                                                                                                                                                                                                                                                                       | 3   |
| Liver Hyperplasia/Hyperproliferator | neoplasia                               | neoplasia of liver                               | 3.93E-02 | MYC, PPARA, TIMP1                                                                                                                                                                                                                                                                                                                                                                                                                                                                                                                                                                                                                                                                                                                                                                                                                                                                                                                                                                                         | 1   |
| Liver Hyperplasia/Hyperproliferator | neoplasia                               | neoplasia of hepatocytes                         | 7.94E-02 | TIMP1                                                                                                                                                                                                                                                                                                                                                                                                                                                                                                                                                                                                                                                                                                                                                                                                                                                                                                                                                                                                     | 1   |
| Liver Hyperplasia/Hyperproliferator | hyperplasia                             | hyperplasia of hepatocytes                       | 7.94E-02 | C3                                                                                                                                                                                                                                                                                                                                                                                                                                                                                                                                                                                                                                                                                                                                                                                                                                                                                                                                                                                                        | 1   |
| Liver Hyperplasia/Hyperproliferator | hyperplasia                             | hyperplasia of liver                             | 2.82E-01 | TIMP1                                                                                                                                                                                                                                                                                                                                                                                                                                                                                                                                                                                                                                                                                                                                                                                                                                                                                                                                                                                                     | 1   |
| Liver Hyperplasia/Hyperproliferator | metastasis                              | metastasis of liver                              | 1.01E-01 | PPARA, TIMP1                                                                                                                                                                                                                                                                                                                                                                                                                                                                                                                                                                                                                                                                                                                                                                                                                                                                                                                                                                                              | 2   |
| Liver Hyperplasia/Hyperproliferator | cancer                                  | cancer of liver                                  | 2.20E-01 | MYC                                                                                                                                                                                                                                                                                                                                                                                                                                                                                                                                                                                                                                                                                                                                                                                                                                                                                                                                                                                                       | 1   |
| Renal Enlargement                   | nephromegaly                            | nephromegaly of mice                             | 6.30E-03 | MT1E, MT1F                                                                                                                                                                                                                                                                                                                                                                                                                                                                                                                                                                                                                                                                                                                                                                                                                                                                                                                                                                                                | 2   |
| Renal Enlargement                   | enlargement                             | enlargement of kidney                            | 1.53E-01 | MT1F                                                                                                                                                                                                                                                                                                                                                                                                                                                                                                                                                                                                                                                                                                                                                                                                                                                                                                                                                                                                      | 1   |
| Cardiac Fibrosis                    | fibrosis                                | fibrosis of myocardium                           | 8.63E-03 | CSF3, NCF1, PPARA, SERPINE1, TIMP1                                                                                                                                                                                                                                                                                                                                                                                                                                                                                                                                                                                                                                                                                                                                                                                                                                                                                                                                                                        | 5   |
| Cardiac Fibrosis                    | fibrosis                                | fibrosis of heart                                | 6.93E-02 | ADRB1, ATF3, POSTN, SERPINE1, STAT3, TNFAIP3                                                                                                                                                                                                                                                                                                                                                                                                                                                                                                                                                                                                                                                                                                                                                                                                                                                                                                                                                              | 6   |
| Cardiac Fibrosis                    | fibrosis                                | fibrosis of ventricular septum                   | 7.94E-02 | ADRB1                                                                                                                                                                                                                                                                                                                                                                                                                                                                                                                                                                                                                                                                                                                                                                                                                                                                                                                                                                                                     | 1   |
| Cardiac Fibrosis                    | fibrosis                                | fibrosis of left ventricle                       | 1.00E00  | ADRB1                                                                                                                                                                                                                                                                                                                                                                                                                                                                                                                                                                                                                                                                                                                                                                                                                                                                                                                                                                                                     | 1   |
| Cardiac Fibrosis                    | cardiac fibrosis                        | cardiac fibrosis of mice                         | 1.77E-02 | AR, LIMS1, NR3C2, PNKD (includes EG-25953), SERPINE1                                                                                                                                                                                                                                                                                                                                                                                                                                                                                                                                                                                                                                                                                                                                                                                                                                                                                                                                                      | 5   |
| Cardiac Congestive Cardiac Failure  | congestive heart failure                | congestive heart failure                         | 1.01E-02 | ADRB1, AR, IL6, KCNK3, NPR3, NR3C1, NR3C2, PDE4B, PDE4D, PDE5A, PDE7A                                                                                                                                                                                                                                                                                                                                                                                                                                                                                                                                                                                                                                                                                                                                                                                                                                                                                                                                     | 11  |
| Heart Failure                       | congestive heart failure                | congestive heart failure                         | 1.01E-02 | ADRB1, AR, IL6, KCNK3, NPR3, NR3C1, NR3C2, PDE4B, PDE4D, PDE5A, PDE7A                                                                                                                                                                                                                                                                                                                                                                                                                                                                                                                                                                                                                                                                                                                                                                                                                                                                                                                                     | 11  |
| Heart Failure                       | diastolic heart failure                 | diastolic heart failure                          | 2.07E-02 | AR, NPR3, NR3C2                                                                                                                                                                                                                                                                                                                                                                                                                                                                                                                                                                                                                                                                                                                                                                                                                                                                                                                                                                                           | 3   |
| Heart Failure                       | heart failure                           | heart failure                                    | 4.59E-02 | ADRB1, AR, BCL2L1, CACNB2, CFLAR, GUCY1A3, GUCY1B3, IL6, KCNK3, LIMS1, NPR3, NR3C1, NR3C2, PDE4B, PDE4D, PDE5A, PDE7A, PPARGC1A, RRAD, SERPINE1, TIMP1                                                                                                                                                                                                                                                                                                                                                                                                                                                                                                                                                                                                                                                                                                                                                                                                                                                    | 21  |
| Heart Failure                       | heart failure                           | heart failure of mice                            | 4.60E-02 | ADRB1, CACNB2, CFLAR, LIMS1, NR3C2, PDE4D, PPARGC1A, SERPINE1, TIMP1                                                                                                                                                                                                                                                                                                                                                                                                                                                                                                                                                                                                                                                                                                                                                                                                                                                                                                                                      | 9   |
| Heart Failure                       | heart failure                           | heart failure of humans                          | 1.53E-01 | SERPINE1                                                                                                                                                                                                                                                                                                                                                                                                                                                                                                                                                                                                                                                                                                                                                                                                                                                                                                                                                                                                  | 1   |
| Heart Failure                       | heart failure                           | heart failure of rats                            | 1.53E-01 | BCL2L1                                                                                                                                                                                                                                                                                                                                                                                                                                                                                                                                                                                                                                                                                                                                                                                                                                                                                                                                                                                                    | 1   |
| Heart Failure                       | cardiac decompensation                  | cardiac decompensation                           | 4.40E-01 | ADRB1                                                                                                                                                                                                                                                                                                                                                                                                                                                                                                                                                                                                                                                                                                                                                                                                                                                                                                                                                                                                     | 1   |
| Renal Inflammation                  | inflammation                            | inflammation of renal glomerulus                 | 1.79E-02 | CFB, TLR2                                                                                                                                                                                                                                                                                                                                                                                                                                                                                                                                                                                                                                                                                                                                                                                                                                                                                                                                                                                                 | 2   |
| Renal Inflammation                  | inflammation                            | inflammation of kidney                           | 5.09E-02 | IGF1, RELB, TNFRSF1A                                                                                                                                                                                                                                                                                                                                                                                                                                                                                                                                                                                                                                                                                                                                                                                                                                                                                                                                                                                      | 3   |
| Cardiac Arrhythmia                  | arrhythmia                              | arrhythmia of heart                              | 2.07E-02 | ADRB1, KCNIP2, PDE4D                                                                                                                                                                                                                                                                                                                                                                                                                                                                                                                                                                                                                                                                                                                                                                                                                                                                                                                                                                                      | 3   |
| Cardiac Arrhythmia                  | arrhythmia                              | onset of arrhythmia of heart                     | 7.94E-02 | ADRB1                                                                                                                                                                                                                                                                                                                                                                                                                                                                                                                                                                                                                                                                                                                                                                                                                                                                                                                                                                                                     | 1   |
| Cardiac Arrhythmia                  | arrhythmia                              | arrhythmia of heart ventricle                    | 1.53E-01 | CASQ2                                                                                                                                                                                                                                                                                                                                                                                                                                                                                                                                                                                                                                                                                                                                                                                                                                                                                                                                                                                                     | 1   |
| Cardiac Arrhythmia                  | arrhythmia                              | arrhythmia                                       | 4.46E-01 | ADRB1, CASQ2, KCNIP2, KCNK3, PDE4D                                                                                                                                                                                                                                                                                                                                                                                                                                                                                                                                                                                                                                                                                                                                                                                                                                                                                                                                                                        | 5   |
| Cardiac Arrhythmia                  | ventricular arrhythmia                  | ventricular arrhythmia                           | 1.00E00  | ADRB1, KCNK3                                                                                                                                                                                                                                                                                                                                                                                                                                                                                                                                                                                                                                                                                                                                                                                                                                                                                                                                                                                              | 2   |
| Cardiac Output                      | cardiac output                          | cardiac output of mice                           | 2.07E-02 | CSF3, IGF1, KITLG                                                                                                                                                                                                                                                                                                                                                                                                                                                                                                                                                                                                                                                                                                                                                                                                                                                                                                                                                                                         | 3   |
| Cardiac Output                      | cardiac output                          | cardiac output                                   | 3.33E-02 | ADRB1, CSF3, IGF1, KITLG                                                                                                                                                                                                                                                                                                                                                                                                                                                                                                                                                                                                                                                                                                                                                                                                                                                                                                                                                                                  | 4   |
| Cardiac Output                      | cardiac output                          | cardiac output of heart                          | 4.40E-01 | ADRB1                                                                                                                                                                                                                                                                                                                                                                                                                                                                                                                                                                                                                                                                                                                                                                                                                                                                                                                                                                                                     | 1   |
| Renal Dysplasia                     | dysplasia                               | dysplasia of kidney                              | 3.39E-02 | CDKN1C, H19                                                                                                                                                                                                                                                                                                                                                                                                                                                                                                                                                                                                                                                                                                                                                                                                                                                                                                                                                                                               | 2   |
| Liver Cirrhosis                     | cirrhosis                               | cirrhosis                                        | 3.81E-02 | ABCC3, ADRB1, CD38, IL6, PPARA, TLR3, TNFRSF1A, TUBA8, TUBA4A                                                                                                                                                                                                                                                                                                                                                                                                                                                                                                                                                                                                                                                                                                                                                                                                                                                                                                                                             | 9   |
| Liver Cirrhosis                     | primary biliary cirrhosis               | primary biliary cirrhosis                        | 1.88E-01 | ABCC3, PPARA, TLR3                                                                                                                                                                                                                                                                                                                                                                                                                                                                                                                                                                                                                                                                                                                                                                                                                                                                                                                                                                                        | 3   |
| Pulmonary Hypertension              | pulmonary hypertension                  | pulmonary hypertension                           | 4.31E-02 | ADRB1, APOE, BCR, IL1RN, PAH, PDE5A                                                                                                                                                                                                                                                                                                                                                                                                                                                                                                                                                                                                                                                                                                                                                                                                                                                                                                                                                                       | 6   |
| Pulmonary Hypertension              | pulmonary hypertension                  | pulmonary hypertension of mice                   | 2.20E-01 | APOE                                                                                                                                                                                                                                                                                                                                                                                                                                                                                                                                                                                                                                                                                                                                                                                                                                                                                                                                                                                                      | 1   |
| Hepatocellular Carcinoma            | hepatocellular carcinoma                | hepatocellular carcinoma                         | 5.62E-02 | BIRC2, CDKN1A, EGFR, EIF2AK2, HIF1A, HP, IQGAP2, MYC, PML, PPARA, SOCS3, TUBA8, TUBA4A, VEGFA                                                                                                                                                                                                                                                                                                                                                                                                                                                                                                                                                                                                                                                                                                                                                                                                                                                                                                             | 14  |
| Liver Cholestasis                   | cholestasis                             | cholestasis of humans                            | 7.63E-02 | ATP8B1, IL6                                                                                                                                                                                                                                                                                                                                                                                                                                                                                                                                                                                                                                                                                                                                                                                                                                                                                                                                                                                               | 2   |
| Liver Cholestasis                   | cholestasis                             | cholestasis                                      | 1.31E-01 | ABCC3, ADH1C (includes EG-126), ATP8B1, IL6, LBP, MGST1, PAH, SULT1A1, TAP2                                                                                                                                                                                                                                                                                                                                                                                                                                                                                                                                                                                                                                                                                                                                                                                                                                                                                                                               | 9   |
| Liver Cholestasis                   | ssive familial intrahepatic cholestasis | ssive familial intrahepatic cholestasis type 1 c | 7.94E-02 | ATP8B1                                                                                                                                                                                                                                                                                                                                                                                                                                                                                                                                                                                                                                                                                                                                                                                                                                                                                                                                                                                                    | 1   |
| Liver Cholestasis                   | ssive familial intrahepatic cholestasis | ssive familial intrahepatic cholestasis type 1   | 1.25E-01 | ADH1C (includes EG-126), ATP8B1, LBP, MGST1, PAH, SULT1A1, TAP2                                                                                                                                                                                                                                                                                                                                                                                                                                                                                                                                                                                                                                                                                                                                                                                                                                                                                                                                           | 7   |
| Liver Cholestasis                   | intrahepatic cholestasis                | intrahepatic cholestasis                         | 1.16E-01 | ABCC3, ADH1C (includes EG-126), ATP8B1, LBP, MGST1, PAH, SULT1A1, TAP2                                                                                                                                                                                                                                                                                                                                                                                                                                                                                                                                                                                                                                                                                                                                                                                                                                                                                                                                    | 8   |
| Liver Hyperbilirubinemia            | hyperbilirubinemia                      | hyperbilirubinemia                               | 7.63E-02 | ABCC3, HMOX1                                                                                                                                                                                                                                                                                                                                                                                                                                                                                                                                                                                                                                                                                                                                                                                                                                                                                                                                                                                              | 2   |
| Renal Fibrosis                      | tubulo-interstitial fibrosis            | tubulo-interstitial fibrosis of kidney           | 7.63E-02 | C3, P2RY1                                                                                                                                                                                                                                                                                                                                                                                                                                                                                                                                                                                                                                                                                                                                                                                                                                                                                                                                                                                                 | 2   |
| Cardiac Degeneration                | degeneration                            | degeneration of myocardium                       | 7.94E-02 | PPARA                                                                                                                                                                                                                                                                                                                                                                                                                                                                                                                                                                                                                                                                                                                                                                                                                                                                                                                                                                                                     | 1   |
| Liver Degradation                   | disintegration                          | disintegration of liver                          | 7.94E-02 | ADAR                                                                                                                                                                                                                                                                                                                                                                                                                                                                                                                                                                                                                                                                                                                                                                                                                                                                                                                                                                                                      | 1   |
| Liver Dysfunction                   | dysfunction                             | dysfunction of liver                             | 7.94E-02 | ATF3                                                                                                                                                                                                                                                                                                                                                                                                                                                                                                                                                                                                                                                                                                                                                                                                                                                                                                                                                                                                      | 1   |
| Renal Hyperplasia/Hyperproliferator | hyperplasia                             | hyperplasia of kidney                            | 7.94E-02 | MYC                                                                                                                                                                                                                                                                                                                                                                                                                                                                                                                                                                                                                                                                                                                                                                                                                                                                                                                                                                                                       | 1   |
| Renal Hyperplasia/Hyperproliferator | hyperplasia                             | hyperplasia of distal tubule                     | 1.53E-01 | HSD11B1                                                                                                                                                                                                                                                                                                                                                                                                                                                                                                                                                                                                                                                                                                                                                                                                                                                                                                                                                                                                   | 1   |
| Cardiac Stenosis                    | aortic stenosis                         | aortic stenosis                                  | 9.39E-02 | ICAM1, MMP3, SELE, TIMP1, TIMP2, VCAM1                                                                                                                                                                                                                                                                                                                                                                                                                                                                                                                                                                                                                                                                                                                                                                                                                                                                                                                                                                    | 6   |

|                          |                          |                                      |          |                                                                    |   |
|--------------------------|--------------------------|--------------------------------------|----------|--------------------------------------------------------------------|---|
| Cardiac Inflammation     | inflammation             | inflammation of heart                | 9.41E-02 | B2M, PNKD (includes EG:25953), RELB                                | 3 |
| Cardiac Dilation         | dilation                 | dilation of left ventricle           | 1.06E-01 | BNIP3 (includes EG:12176), MARCKSL1, SERPINE1, SLC2A1, TIMP1       | 5 |
| Cardiac Dilation         | dilation                 | dilation of heart chamber            | 1.13E-01 | BNIP3 (includes EG:12176), MARCKSL1, NCF1, SERPINE1, SLC2A1, TIMP1 | 6 |
| Congenital Heart Anomaly | congenital heart disease | congenital heart disease             | 1.11E-01 | ADRB1, DTNA, PBX1                                                  | 3 |
| Liver Regeneration       | regeneration             | regeneration of liver                | 1.11E-01 | C3, CSF3, IL6                                                      | 3 |
| Liver Regeneration       | regeneration             | regeneration of liver cells          | 5.25E-01 | IL6                                                                | 1 |
| Renal Dysfunction        | dysfunction              | dysfunction of kidney                | 1.11E-01 | C3, MYD88, TLR2                                                    | 3 |
| Glomerular Injury        | glomerulopathy           | glomerulopathy of mice               | 1.32E-01 | APOE, C3, FCER1G, LGALS3                                           | 4 |
| Glomerular Injury        | glomerulopathy           | glomerulopathy                       | 1.67E-01 | APOE, C3, FCER1G, LGALS3, P2RY1                                    | 5 |
| Glomerular Injury        | glomerulosclerosis       | glomerulosclerosis of kidney         | 1.53E-01 | P2RY1                                                              | 1 |
| Glomerular Injury        | glomerulosclerosis       | glomerulosclerosis                   | 4.93E-01 | APOE, C3, P2RY1                                                    | 3 |
| Glomerular Injury        | glomerulosclerosis       | glomerulosclerosis of mice           | 5.06E-01 | APOE, C3                                                           | 2 |
| Bradycardia              | sinus bradycardia        | sinus bradycardia of heart           | 1.53E-01 | TRIM21                                                             | 1 |
| Bradycardia              | bradycardia              | bradycardia                          | 5.31E-01 | RAC1, TRIM21                                                       | 2 |
| Liver Edema              | edema                    | edema of liver                       | 1.53E-01 | VEGFA                                                              | 1 |
| Renal Degeneration       | degeneration             | degeneration of tubular cells        | 1.53E-01 | MT1F                                                               | 1 |
| Renal Regeneration       | regeneration             | regeneration of glomerular capillary | 1.53E-01 | VEGFA                                                              | 1 |
| Liver Degeneration       | degeneration             | degeneration of liver                | 1.86E-01 | DDX58, TBK1                                                        | 2 |
| Liver Degeneration       | degeneration             | degeneration of liver cells          | 2.20E-01 | TBK1                                                               | 1 |
| Cardiac Enlargement      | enlargement              | enlargement of heart ventricle       | 2.20E-01 | CTSL2                                                              | 1 |
| Cardiac Enlargement      | enlargement              | enlargement of atrium                | 2.82E-01 | CTSL2                                                              | 1 |
| Liver Adhesion           | adhesion                 | adhesion of hepatic stellate cells   | 2.20E-01 | ITGB3                                                              | 1 |
| Nephrosis                | nephrosis                | nephrosis                            | 2.38E-01 | NR3C1, PDE4B, PDE4D, PDE5A, PDE7A                                  | 5 |
| Cardiac Transformation   | transformation           | transformation of endocardial cells  | 2.82E-01 | VEGFA                                                              | 1 |
| Liver Dysplasia          | dysplasia                | dysplasia of liver                   | 2.82E-01 | PML                                                                | 1 |
| Liver Hepatomegaly       | hepatomegaly             | hepatomegaly of mice                 | 3.07E-01 | ADIPOQ, PPARA                                                      | 2 |
| Liver Fibrosis           | fibrosis                 | fibrosis of liver                    | 3.42E-01 | HP, NCF1, STAT1                                                    | 3 |
| Liver Failure            | liver failure            | liver failure of mice                | 3.91E-01 | FAS                                                                | 1 |
| Liver Hematopoiesis      | hematopoiesis            | hematopoiesis of liver               | 3.91E-01 | SOCS3                                                              | 1 |
| Cardiac Hypoplasia       | hypoplasia               | hypoplasia of myocardium             | 4.84E-01 | MYCN                                                               | 1 |
| Cardiac Proliferation    | proliferation            | proliferation of heart cells         | 5.79E-01 | IGF1, ITGB2                                                        | 2 |

TABLE 9A - LPS RESPONSES INHIBITED BY A2A KO

| AffyID       | RefSeq         | Entrez Gene     | Gene Title                                                                                                                                  | Gene Symbol          | WT Fold Change | KO Fold Change | KO/WT | Response                                     |
|--------------|----------------|-----------------|---------------------------------------------------------------------------------------------------------------------------------------------|----------------------|----------------|----------------|-------|----------------------------------------------|
| 1449025_at   | NM_010501      | 15959           | interferon-induced protein with tetratricopeptide repeats 3                                                                                 | Ifit3                | 51.71          | 29.14          | 0.56  | LPS Response in WT reduced by 1.5 with A2 KO |
| 1425233_at   | NM_144544      | 78354           | RIKEN cDNA 2210407C18 gene                                                                                                                  | 2210407C18Rik        | 19.33          | 12.97          | 0.67  | LPS Response in WT reduced by 1.5 with A2 KO |
| 1421008_at   | NM_021384      | 58185           | radical S-adenosyl methionine domain containing 2                                                                                           | Rsad2                | 11.14          | 5.54           | 0.50  | LPS Response in WT reduced by 1.5 with A2 KO |
| 1419598_at   | NM_026835      | 68774           | membrane-spanning 4-domains, subfamily A, member 6D                                                                                         | Ms4a6d               | 9.80           | 5.58           | 0.57  | LPS Response in WT reduced by 1.5 with A2 KO |
| 1424339_at   | NM_145209      | 231655          | 2'-5' oligoadenylate synthetase-like 1                                                                                                      | Oas1l                | 8.91           | 5.05           | 0.57  | LPS Response in WT reduced by 1.5 with A2 KO |
| 1450299_s at | NM_018866      | 55895           | chemokine (C-X-C motif) ligand 13                                                                                                           | Cxcl13               | 8.35           | 4.41           | 0.53  | LPS Response in WT reduced by 1.5 with A2 KO |
| 1434776_at   | NM_009154      | 20356           | membrane-spanning 4-domains, subfamily A, member 4C                                                                                         | Ms4a4c               | 7.27           | 3.96           | 0.54  | LPS Response in WT reduced by 1.5 with A2 KO |
| 1451644_a at | 10390 // XM_9  | 15006 // 68395  | sema domain, seven thrombospondin repeats (type 1 and type 1-like), transmembrane domain (TM) and short cytoplasmic domain, (semaphorin) 5A | Sema5a               | 6.63           | 3.07           | 0.46  | LPS Response in WT reduced by 1.5 with A2 KO |
| 1448239_at   | NM_010442      | 15368           | histocompatibility 2, Q region locus 1 // RIKEN cDNA 0610037M15 gene                                                                        | 2-Q1 // 0610037M15R  | 6.24           | 3.86           | 0.62  | LPS Response in WT reduced by 1.5 with A2 KO |
| 1449485_at   | NM_010407      | 15162           | heme oxygenase (decycling) 1                                                                                                                | Hmox1                | 5.09           | 3.01           | 0.60  | LPS Response in WT reduced by 1.5 with A2 KO |
| 1450808_at   | NM_013521      | 14293           | hemopoietic cell kinase                                                                                                                     | Hck                  | 5.07           | 3.14           | 0.62  | LPS Response in WT reduced by 1.5 with A2 KO |
| 1450484_a at | NM_020557      | 22169           | formyl peptide receptor 1                                                                                                                   | Fpr1                 | 5.05           | 3.35           | 0.66  | LPS Response in WT reduced by 1.5 with A2 KO |
| 1450378_at   | 1025313 // NM  | 21356           | thymidylate kinase family LPS-inducible member                                                                                              | Tyki                 | 4.92           | 3.06           | 0.62  | LPS Response in WT reduced by 1.5 with A2 KO |
| 1459557_at   | NM_001033324   | 235320          | TAP binding protein                                                                                                                         | Tapbp                | 4.71           | 3.04           | 0.65  | LPS Response in WT reduced by 1.5 with A2 KO |
| 1424518_at   | 1005082 // XM  | 223672 // 71898 | Zinc finger and BTB domain containing 16                                                                                                    | Zbtb16               | 4.65           | 3.06           | 0.66  | LPS Response in WT reduced by 1.5 with A2 KO |
| 1439608_at   | NM_030711      | 80898           | RIKEN cDNA 2310016F22 gene // cDNA sequence BC020489                                                                                        | 10016F22Rik // BC020 | 4.54           | 2.95           | 0.65  | LPS Response in WT reduced by 1.5 with A2 KO |
| 1458271_at   | ---            | ---             | type 1 tumor necrosis factor receptor shedding aminopeptidase regulator                                                                     | Arts1                | 4.52           | 2.91           | 0.64  | LPS Response in WT reduced by 1.5 with A2 KO |
| 1458299_s at | NM_008690      | 18037           | 12 days embryo spinal cord cDNA, RIKEN full-length enriched library, clone:CS53003P15                                                       | ---                  | 4.24           | 2.43           | 0.57  | LPS Response in WT reduced by 1.5 with A2 KO |
| 1423954_at   | NM_009778      | 12266           | product:unclassifiable, full insert sequence                                                                                                | ---                  | ---            | ---            | ---   | ---                                          |
| 1451382_at   | NM_026929      | 69065           | nuclear factor of kappa light polypeptide gene enhancer in B-cells inhibitor, epsilon                                                       | Nfkbie               | 4.20           | 2.46           | 0.59  | LPS Response in WT reduced by 1.5 with A2 KO |
| 1435331_at   | NM_175026      | 236312          | complement component 3                                                                                                                      | C3                   | 4.19           | 2.77           | 0.66  | LPS Response in WT reduced by 1.5 with A2 KO |
| 1422512_a at | NM_031373      | 72075           | ChAc, cation transport regulator-like 1 (E. coli)                                                                                           | Chac1                | 4.11           | 2.3            | 0.56  | LPS Response in WT reduced by 1.5 with A2 KO |
| 1454211_a at | NM_015756      | 27428           | expressed sequence AI447904                                                                                                                 | AI447904             | 3.99           | 2.56           | 0.64  | LPS Response in WT reduced by 1.5 with A2 KO |
| 1449453_at   | NM_009763      | 12182           | opioid growth factor receptor                                                                                                               | Oqrl                 | 3.75           | 2.41           | 0.64  | LPS Response in WT reduced by 1.5 with A2 KO |
| 1418148_at   | NM_021304      | 57742           | shroom                                                                                                                                      | Shrm                 | 3.62           | 2.22           | 0.61  | LPS Response in WT reduced by 1.5 with A2 KO |
| 1426235_a at | NM_008131      | 14645           | bone marrow stromal cell antigen 1                                                                                                          | Bst1                 | 3.48           | 2.14           | 0.61  | LPS Response in WT reduced by 1.5 with A2 KO |
| 1435261_at   | ---            | 320737          | abhydrolase domain containing 1                                                                                                             | Abhd1                | 3.22           | 1.83           | 0.57  | LPS Response in WT reduced by 1.5 with A2 KO |
| 1456890_at   | NM_172689      | 230073          | glutamate-ammonia ligase (glutamine synthetase)                                                                                             | Glul                 | 3.18           | 1.77           | 0.56  | LPS Response in WT reduced by 1.5 with A2 KO |
| 1451854_a at | NM_015756      | 27428           | RIKEN cDNA 4732416N19 gene                                                                                                                  | 4732416N19Rik        | 3.10           | 2.05           | 0.66  | LPS Response in WT reduced by 1.5 with A2 KO |
| 1420871_x at | NM_029499      | 64380           | DEAD (Asp-Glu-Ala-Asp) box polypeptide 58                                                                                                   | Ddx58                | 3.02           | 2.01           | 0.67  | LPS Response in WT reduced by 1.5 with A2 KO |
| 1439855_at   | NM_198967      | 387314          | shroom                                                                                                                                      | Shrm                 | 3.01           | 1.8            | 0.60  | LPS Response in WT reduced by 1.5 with A2 KO |
| 1422006_at   | NM_011163      | 19106           | membrane-spanning 4-domains, subfamily A, member 4C                                                                                         | Ms4a4c               | 2.88           | 1.7            | 0.59  | LPS Response in WT reduced by 1.5 with A2 KO |
| 1417562_at   | NM_007918      | 13685           | cDNA sequence BC023818                                                                                                                      | BC023818             | 2.74           | 1.66           | 0.61  | LPS Response in WT reduced by 1.5 with A2 KO |
| 1429900_at   | ---            | 76671           | eukaryotic translation initiation factor 2-alpha class 2                                                                                    | Eif2ak2              | 2.72           | 1.68           | 0.62  | LPS Response in WT reduced by 1.5 with A2 KO |
| 1427759_a at | NM_007491      | 11875           | eukaryotic translation initiation factor 4E binding protein 1                                                                               | Eif4ebp1             | 2.65           | 1.77           | 0.67  | LPS Response in WT reduced by 1.5 with A2 KO |
| 1417522_at   | NM_026346      | 67331           | RIKEN cDNA 5330406M23 gene                                                                                                                  | 5330406M23Rik        | 2.57           | 1.53           | 0.60  | LPS Response in WT reduced by 1.5 with A2 KO |
| 1436212_at   | NM_172514      | 213068          | ADP-ribosyltransferase 5                                                                                                                    | Arts                 | 2.50           | 1.39           | 0.56  | LPS Response in WT reduced by 1.5 with A2 KO |
| 1451314_a at | NM_011693      | 22329           | ADP-ribosyltransferase 5                                                                                                                    | Arts                 | 2.43           | 1.57           | 0.65  | LPS Response in WT reduced by 1.5 with A2 KO |
| 1417620_at   | NM_009008      | 19354           | F-box only protein 32                                                                                                                       | Fbxo32               | 2.41           | 1.56           | 0.65  | LPS Response in WT reduced by 1.5 with A2 KO |
| 1444749_at   | NM_007470      | 11815           | transmembrane protein 71                                                                                                                    | Tmem71               | 2.41           | 1.56           | 0.65  | LPS Response in WT reduced by 1.5 with A2 KO |
| 1448454_at   | NM_009763      | 12182           | vascular cell adhesion molecule 1                                                                                                           | Vcam1                | 2.41           | 1.56           | 0.65  | LPS Response in WT reduced by 1.5 with A2 KO |
| 1451953_s at | NM_010846      | 11857           | RAS-related C3 botulinum substrate 2                                                                                                        | Rac2                 | 2.39           | 1.57           | 0.66  | LPS Response in WT reduced by 1.5 with A2 KO |
| 1451553_at   | NM_007491      | 11875           | Apolipoprotein D                                                                                                                            | Apod                 | 2.34           | 1.38           | 0.59  | LPS Response in WT reduced by 1.5 with A2 KO |
| 1422167_at   | NM_009154      | 20356           | bone marrow stromal cell antigen 1                                                                                                          | Bst1                 | 2.33           | 1.39           | 0.60  | LPS Response in WT reduced by 1.5 with A2 KO |
| 1416194_at   | NM_007823      | 13120           | influenza virus (influenza virus) resistance 1                                                                                              | Irf5                 | 2.33           | 1.48           | 0.64  | LPS Response in WT reduced by 1.5 with A2 KO |
| 1416371_at   | NM_007470      | 11815           | ADP-ribosyltransferase 5                                                                                                                    | Arts                 | 2.31           | 1.55           | 0.67  | LPS Response in WT reduced by 1.5 with A2 KO |
| 1433963_a at | NM_153795      | 108101          | sema domain, seven thrombospondin repeats (type 1 and type 1-like), transmembrane domain (TM) and short cytoplasmic domain, (semaphorin) 5A | Sema5a               | 2.28           | 1.46           | 0.64  | LPS Response in WT reduced by 1.5 with A2 KO |
| 1423275_a at | NM_009710      | 11870           | cytochrome P450, family 4, subfamily b, polypeptide 1                                                                                       | Cyp4b1               | 2.23           | 1.45           | 0.65  | LPS Response in WT reduced by 1.5 with A2 KO |
| 1434283_at   | NM_023598      | 71371           | apolipoprotein D                                                                                                                            | Apod                 | 2.21           | 1.3            | 0.59  | LPS Response in WT reduced by 1.5 with A2 KO |
| 1416265_at   | NM_011796      | 23830           | cDNA sequence BC032204                                                                                                                      | BC032204             | 2.17           | 1.43           | 0.66  | LPS Response in WT reduced by 1.5 with A2 KO |
| 1451787_at   | 0998 // NM_0   | 13088           | ADP-ribosyltransferase 1                                                                                                                    | Arts                 | 2.14           | 1.39           | 0.65  | LPS Response in WT reduced by 1.5 with A2 KO |
| 1458802_at   | NM_010657      | 16656           | AT rich interactive domain 5B (Mrf1 like)                                                                                                   | Arid5b               | 2.07           | 1.33           | 0.64  | LPS Response in WT reduced by 1.5 with A2 KO |
| 1417563_at   | NM_007918      | 13685           | calpain 10                                                                                                                                  | Capn10               | 1.96           | 1.29           | 0.66  | LPS Response in WT reduced by 1.5 with A2 KO |
| 1426524_a at | 25347 // NM_0  | 66090           | cytochrome P450, family 2, subfamily b, polypeptide 10                                                                                      | Cyp2b10              | 1.90           | 1.12           | 0.59  | LPS Response in WT reduced by 1.5 with A2 KO |
| 1436121_a at | NM_026330      | 67711           | human immunodeficiency virus type 1 enhancer binding protein 3                                                                              | Hivep3               | 1.81           | 1.13           | 0.62  | LPS Response in WT reduced by 1.5 with A2 KO |
| 1420540_a at | NM_009069      | 19769           | eukaryotic translation initiation factor 4E binding protein 1                                                                               | Eif4ebp1             | 1.71           | 1.12           | 0.65  | LPS Responsive in WT but Not KO              |
| 1418290_a at | NM_007970      | 14055           | yippe-like 3 (Drosophila)                                                                                                                   | Yippe3               | 1.70           | 1.05           | 0.62  | LPS Response in WT reduced by 1.5 with A2 KO |
| 1416315_at   | NM_134076      | 105501          | non-SMC element 1 homolog (S. cerevisiae)                                                                                                   | Nsmc1                | 1.69           | 1.13           | 0.67  | LPS Response in WT reduced by 1.5 with A2 KO |
| 1457305_at   | ---            | ---             | Ras-like without CAAX 1                                                                                                                     | Rit1                 | 1.64           | 1.06           | 0.65  | LPS Responsive in WT but Not KO              |
| 1440092_at   | NM_010162      | 14042           | enhancer of zeste homolog 1 (Drosophila)                                                                                                    | Ezh1                 | 1.56           | 1.01           | 0.65  | LPS Responsive in WT but Not KO              |
| 1444945_at   | NM_011261      | 19699           | abhydrolase domain containing 4                                                                                                             | Abhd4                | 1.54           | 1.03           | 0.67  | LPS Responsive in WT but Not KO              |
| 1455150_at   | ---            | ---             | Transcribed locus                                                                                                                           | ---                  | -1.41          | 1.04           | -0.74 | LPS Responsive in WT but Not KO              |
| 1438719_at   | ---            | 106920          | Exostoses (multiple) 1                                                                                                                      | Ext1                 | -1.44          | 1.06           | -0.74 | LPS Responsive in WT but Not KO              |
| 1415943_at   | NM_011519      | 20969           | resilin                                                                                                                                     | Reln                 | -1.55          | -1.04          | -0.67 | LPS Responsive in WT but Not KO              |
| 1441391_at   | NM_023120      | 13972           | 13 days embryo forelimb cDNA, RIKEN full-length enriched library, clone:5930438H13                                                          | ---                  | -1.67          | -1.08          | -0.65 | LPS Responsive in WT but Not KO              |
| 1439305_at   | ---            | ---             | product:unclassifiable, full insert sequence                                                                                                | ---                  | ---            | ---            | ---   | ---                                          |
| 1439307_at   | NM_007664      | 12558           | expressed sequence AI585793                                                                                                                 | AI585793             | -1.69          | 1.06           | -0.63 | LPS Responsive in WT but Not KO              |
| 1437479_x at | 11535 // NM_1  | 21386           | syndecan 1                                                                                                                                  | Sdc1                 | -1.74          | -1.13          | -0.65 | LPS Responsive in WT but Not KO              |
| 1448673_at   | // NM_021496 / | 58998           | Guanine nucleotide binding protein (G protein), beta polypeptide 1-like                                                                     | Gnb1l                | -1.76          | -1.02          | -0.58 | LPS Responsive in WT but Not KO              |
| 1454764_s at | NM_134086      | 105727          | 12 days embryo spinal cord cDNA, RIKEN full-length enriched library, clone:CS530050B12                                                      | ---                  | -1.76          | -1.17          | -0.66 | LPS Responsive in WT but Not KO              |
| 1424350_s at | NM_172266      | 226856          | Cadherin 2                                                                                                                                  | Cdh2                 | -1.77          | -1.09          | -0.62 | LPS Responsive in WT but Not KO              |
| 1457305_at   | NM_134086      | 105727          | T-box 3                                                                                                                                     | Tbx3                 | -1.78          | -1.13          | -0.63 | LPS Responsive in WT but Not KO              |
| 1435521_at   | NM_054043      | 76626           | poliovirus receptor-related 3                                                                                                               | Pvr3                 | -1.82          | 1.1            | -0.60 | LPS Responsive in WT but Not KO              |
| 1442846_at   | 08783 // NM_1  | 18514           | solute carrier family 38, member 1                                                                                                          | Slc38a1              | -1.85          | -1.19          | -0.64 | LPS Responsive in WT but Not KO              |
| 1455009_at   | 1004040 // XM  | 192950          | lysophosphatidylcholine acyltransferase 1                                                                                                   | Lsdcat1              | -1.86          | -1.15          | -0.62 | LPS Responsive in WT but Not KO              |
| 1441608_at   | NM_009784      | 12293           | DNA segment, Chr 13, ERAIO Dot 787, expressed                                                                                               | D13Ert8787e          | -1.89          | -1.24          | -0.66 | LPS Response in WT reduced by 1.5 with A2 KO |
| 1450397_at   | NM_008634      | 17755           | Musashi homolog 2 (Drosophila)                                                                                                              | Msi2                 | -1.91          | -1.17          | -0.61 | LPS Responsive in WT but Not KO              |
| 1431791_at   | NM_011406      | 20541           | Pre B-cell leukemia transcription factor 1                                                                                                  | Pbx1                 | -1.94          | -1.17          | -0.60 | LPS Response in WT reduced by 1.5 with A2 KO |
| 1440966_at   | NM_020575      | 57438           | cDNA sequence AB182283                                                                                                                      | AB182283             | -1.96          | -1.27          | -0.65 | LPS Response in WT reduced by 1.5 with A2 KO |
| 1415822_at   | NM_009128      | 20250           | Calcium channel, voltage-dependent, alpha2/delta subunit 1                                                                                  | Cacna2d1             | -1.96          | -1.3           | -0.66 | LPS Response in WT reduced by 1.5 with A2 KO |
| 1441262_at   | NM_009289      | 20874           | microtubule-associated protein 1 B                                                                                                          | Mtap1b               | -1.97          | -1.17          | -0.59 | LPS Responsive in WT but Not KO              |
| 1425710_a at | // NM_147176 / | 26556           | solute carrier family 8 (sodium/calcium exchanger), member 1                                                                                | Slc8a1               | -2.03          | -1.34          | -0.66 | LPS Response in WT reduced by 1.5 with A2 KO |
| 1426417_at   | NM_026417      | 67864           | membrane-associated ring finger (C3HC4)                                                                                                     | Nar-07               | -2.06          | -1.19          | -0.58 | LPS Response in WT reduced by 1.5 with A2 KO |
| 1453593_at   | 83372 // XM_9  | 73569           | stearyl-Coenzyme A desaturase 2                                                                                                             | Scd2                 | -2.06          | -1.35          | -0.66 | LPS Response in WT reduced by 1.5 with A2 KO |
| 1452260_at   | NM_178373      | 14311           | STE20-like kinase (yeast)                                                                                                                   | Sik                  | -2.08          | -1.31          | -0.63 | LPS Response in WT reduced by 1.5 with A2 KO |
| 1450779_at   | NM_021272      | 12140           | homer homolog 1 (Drosophila)                                                                                                                | Homer1               | -2.09          | -1.19          | -0.57 | LPS Response in WT reduced by 1.5 with A2 KO |
|              |                |                 | Yip1 domain family, member 4                                                                                                                | Yip4                 | -2.09          | -1.22          | -0.58 | LPS Response in WT reduced by 1.5 with A2 KO |
|              |                |                 | RIKEN cDNA 1700110N18 gene                                                                                                                  | 1700110N18Rik        | -2.11          | -1.26          | -0.60 | LPS Response in WT reduced by 1.5 with A2 KO |
|              |                |                 | cell death-inducible DIFFA-like effector c                                                                                                  | Cidc                 | -2.15          | -1.11          | -0.52 | LPS Responsive in WT but Not KO              |
|              |                |                 | fatty acid binding protein 7, brain                                                                                                         | Fabp7                | -2.15          | -1.35          | -0.63 | LPS Response in WT reduced by 1.5 with A2 KO |



|              |               |        |        |                                                                        |               |        |        |      |                                              |
|--------------|---------------|--------|--------|------------------------------------------------------------------------|---------------|--------|--------|------|----------------------------------------------|
| 1458601 at   | ---           | ---    | 399578 | RIKEN cDNA 8030447M02 gene                                             | 8030447M02Rik | -2.16  | -1.33  | 0.62 | LPS Response in WT reduced by 1.5 with A2 KO |
| 1437279 x at | NM 011519     | 20969  | 20969  | syndecan 1                                                             | Sdc1          | -2.17  | -1.33  | 0.61 | LPS Response in WT reduced by 1.5 with A2 KO |
| 1440227 at   | ---           | 503859 | 503859 | expressed sequence BF642829                                            | BF642829      | -2.17  | -1.43  | 0.66 | LPS Response in WT reduced by 1.5 with A2 KO |
| 1436387 at   | ---           | 320588 | 320588 | RIKEN cDNA C33006P03 gene                                              | C33006P03Rik  | -2.23  | -1.25  | 0.56 | LPS Response in WT reduced by 1.5 with A2 KO |
| 1447853 x at | NM 010617     | 16553  | 16553  | Kinesin family member 13A                                              | Kif13a        | -2.25  | -1.41  | 0.63 | LPS Response in WT reduced by 1.5 with A2 KO |
| 1437305 at   | NM 175466     | 228491 | 228491 | RIKEN cDNA 6430601A21 gene                                             | 6430601A21Rik | -2.28  | -1.07  | 0.47 | LPS Responsive in WT but Not KO              |
| 1441364_at   | NM_008092     | 14463  | 14463  | GATA binding protein 4                                                 | Gata4         | -2.28  | -1.32  | 0.58 | LPS Response in WT reduced by 1.5 with A2 KO |
| 1434101 at   | NM 008687     | 18028  | 18028  | nuclear factor I/B                                                     | Nf1b          | -2.30  | -1.45  | 0.63 | LPS Response in WT reduced by 1.5 with A2 KO |
| 1434958_at   | NM_172809     | 50720  | 50720  | sacsin                                                                 | Sacs          | -2.31  | -1.15  | 0.50 | LPS Responsive in WT but Not KO              |
| 1458847 at   | ---           | ---    | ---    | ---                                                                    | ---           | -2.34  | -1.41  | 0.60 | LPS Response in WT reduced by 1.5 with A2 KO |
| 1453588 at   | NM 007606     | 12350  | 12350  | carbonic anhydrase 3                                                   | Car3          | -2.37  | -1.56  | 0.66 | LPS Response in WT reduced by 1.5 with A2 KO |
| 1448170 at   | NM 009174     | 20439  | 20439  | seven in absentia 2                                                    | Siah2         | -2.40  | -1.45  | 0.60 | LPS Response in WT reduced by 1.5 with A2 KO |
| 1425343 at   | NM 024257     | 72748  | 72748  | haloacid dehalogenase-like hydrolase domain containing 3               | Hdh3          | -2.47  | -1.36  | 0.65 | LPS Response in WT reduced by 1.5 with A2 KO |
| 1447176 at   | 75268 // NM 2 | 77938  | 77938  | RIKEN cDNA A930008G19 gene                                             | A930008G19Rik | -2.54  | -1.43  | 0.56 | LPS Response in WT reduced by 1.5 with A2 KO |
| 1424357 at   | NM 144936     | 235135 | 235135 | transmembrane protein 45b                                              | Tmem45b       | -2.56  | -1.37  | 0.54 | LPS Response in WT reduced by 1.5 with A2 KO |
| 1438301_at   | NM_010026     | 13196  | 13196  | Development and differentiation enhancing                              | Ddef1         | -2.56  | -1.66  | 0.65 | LPS Response in WT reduced by 1.5 with A2 KO |
| 1430561 at   | 24514 // XM 9 | 70604  | 70604  | DnaJ (Hsp40) homolog, subfamily B, member 14                           | Dnaib14       | -2.58  | -1.3   | 0.50 | LPS Response in WT reduced by 1.5 with A2 KO |
| 1417135_at   | NM_009274     | 20817  | 20817  | serine/arginine-rich protein specific kinase 2                         | Srpk2         | -2.60  | -1.21  | 0.47 | LPS Response in WT reduced by 1.5 with A2 KO |
| 1442686 at   | NM 058212     | 70127  | 70127  | D4, zinc and double PHD fingers, family 3                              | Dpf3          | -2.61  | -1.65  | 0.63 | LPS Response in WT reduced by 1.5 with A2 KO |
| 1447231 at   | NM 011406     | 20541  | 20541  | Solute carrier family 8 (sodium/calcium exchanger), member 1           | Slc8a1        | -2.65  | -1.59  | 0.60 | LPS Response in WT reduced by 1.5 with A2 KO |
| 1438664 at   | NM 011158     | 19088  | 19088  | protein kinase, cAMP dependent, regulatory, type II beta               | Pknox2b       | -2.71  | -1.5   | 0.55 | LPS Response in WT reduced by 1.5 with A2 KO |
| 1438496 a at | NM 172779     | 236790 | 236790 | RIKEN cDNA 6330505F04 gene                                             | 6330505F04Rik | -2.76  | -1.61  | 0.58 | LPS Response in WT reduced by 1.5 with A2 KO |
| 1439532 s at | NM 010617     | 16553  | 16553  | kinesin family member 13A                                              | Kif13a        | -2.77  | -1.45  | 0.52 | LPS Response in WT reduced by 1.5 with A2 KO |
| 1436453 at   | ---           | 101918 | 101918 | expressed sequence BB144871                                            | BB144871      | -2.78  | -1.37  | 0.49 | LPS Response in WT reduced by 1.5 with A2 KO |
| 1449270_at   | NM_026162     | 67448  | 67448  | plexin domain containing 2                                             | Plexc2        | -2.82  | -1.89  | 0.67 | LPS Response in WT reduced by 1.5 with A2 KO |
| 1433885 at   | ---           | 544963 | 544963 | IQ motif containing GTPase activating protein 2                        | Iqaap2        | -2.86  | -1.91  | 0.67 | LPS Response in WT reduced by 1.5 with A2 KO |
| 1446264_at   | NM_144800     | 211401 | 211401 | metastasis suppressor 1                                                | Mts1          | -2.92  | -1.87  | 0.64 | LPS Response in WT reduced by 1.5 with A2 KO |
| 1418648 at   | NM 028133     | 112407 | 112407 | EGL nine homolog 3 (C. elegans)                                        | Egl3          | -3.02  | -1.94  | 0.64 | LPS Response in WT reduced by 1.5 with A2 KO |
| 1444416 at   | NM 007681     | 12615  | 12615  | Centromere autoantigen A                                               | Cenpa         | -3.08  | -2.06  | 0.67 | LPS Response in WT reduced by 1.5 with A2 KO |
| 1450754 at   | XM 976267     | 669637 | 669637 | similar to calcium channel, voltage-dependent, alpha 2/delta subunit 2 | LOC669637     | -3.20  | -1.94  | 0.61 | LPS Response in WT reduced by 1.5 with A2 KO |
| 1442368 at   | NM 175429     | 207474 | 207474 | potassium channel tetramerisation domain containing 12b                | Kctd12b       | -3.21  | -1.73  | 0.54 | LPS Response in WT reduced by 1.5 with A2 KO |
| 1459894 at   | ---           | 544963 | 544963 | IQ motif containing GTPase activating protein 2                        | Iqaap2        | -3.22  | -1.84  | 0.57 | LPS Response in WT reduced by 1.5 with A2 KO |
| 1457296 at   | NM 173385     | 214425 | 214425 | cartilage intermediate layer protein, nucleotide pyrophosphohydrolase  | Cilp          | -3.30  | -2.12  | 0.64 | LPS Response in WT reduced by 1.5 with A2 KO |
| 1423065 at   | 07872 // NM 1 | 13435  | 13435  | DNA methyltransferase 3A                                               | Dnmt3a        | -3.32  | -1.43  | 0.43 | LPS Response in WT reduced by 1.5 with A2 KO |
| 1435135 at   | NM 178772     | 320024 | 320024 | arylacetamide deacetylase-like 1                                       | Aadacl1       | -3.39  | -1.74  | 0.51 | LPS Response in WT reduced by 1.5 with A2 KO |
| 1438892_at   | NM_021881     | 19317  | 19317  | Quaking                                                                | Qk            | -3.43  | -1.56  | 0.45 | LPS Response in WT reduced by 1.5 with A2 KO |
| 1418197 at   | NM 009463     | 22227  | 22227  | uncoupling protein 1 (mitochondrial, proton carrier)                   | Ucp1          | -3.44  | -1.69  | 0.49 | LPS Response in WT reduced by 1.5 with A2 KO |
| 1445481 at   | ---           | 106549 | 106549 | expressed sequence AI317158                                            | AI317158      | -3.49  | -1.75  | 0.50 | LPS Response in WT reduced by 1.5 with A2 KO |
| 1425597 a at | NM 021881     | 19317  | 19317  | quaking                                                                | Qk            | -3.79  | -2.1   | 0.55 | LPS Response in WT reduced by 1.5 with A2 KO |
| 1427320 at   | NR 002845     | 54158  | 54158  | coatamer protein complex, subunit gamma 2, antisense 2                 | Copg2as2      | -4.21  | -2.82  | 0.67 | LPS Response in WT reduced by 1.5 with A2 KO |
| 1430584 s at | NM 007606     | 12350  | 12350  | carbonic anhydrase 3                                                   | Car3          | -4.26  | -2.08  | 0.49 | LPS Response in WT reduced by 1.5 with A2 KO |
| 1460336 at   | NM 008904     | 19017  | 19017  | peroxisome proliferator activated receptor, gamma, coactivator 1 alpha | Pparoc1a      | -4.69  | -2.54  | 0.54 | LPS Response in WT reduced by 1.5 with A2 KO |
| 1418509 at   | NM 007621     | 12409  | 12409  | carbonyl reductase 2                                                   | Cbr2          | -5.00  | -2.78  | 0.56 | LPS Response in WT reduced by 1.5 with A2 KO |
| 1453486 a at | NM 020052     | 56788  | 56788  | signal peptide, CUB domain, EGF-like 2                                 | Scube2        | -7.15  | -3.74  | 0.52 | LPS Response in WT reduced by 1.5 with A2 KO |
| 1434672 at   | NM 175191     | 73010  | 73010  | G protein-coupled receptor 22                                          | Gpr22         | -7.78  | -4.45  | 0.57 | LPS Response in WT reduced by 1.5 with A2 KO |
| 1460256 at   | NM 007606     | 12350  | 12350  | carbonic anhydrase 3                                                   | Car3          | -8.49  | -5.64  | 0.66 | LPS Response in WT reduced by 1.5 with A2 KO |
| 1422651 at   | NM 009605     | 11450  | 11450  | adiponectin, C1Q and collagen domain containing                        | Adipoq        | -19.39 | -10.04 | 0.52 | LPS Response in WT reduced by 1.5 with A2 KO |

TABLE 9B - LPS RESPONSES AUGMENTED BY A2A KO

| AffyID       | RefSeq                           | Entrez Gene                                                                                                                                      | Gene Title                                                                                                                                                                                                                            | Gene Symbol          | WT Fold Change | KO Fold Change | KO/WT                              | Response                           |
|--------------|----------------------------------|--------------------------------------------------------------------------------------------------------------------------------------------------|---------------------------------------------------------------------------------------------------------------------------------------------------------------------------------------------------------------------------------------|----------------------|----------------|----------------|------------------------------------|------------------------------------|
| 1427747_a_at | NM_008491                        | 16819                                                                                                                                            | lipocalin 2                                                                                                                                                                                                                           | Lcn2                 | 622.75         | 953.77         | 1.53                               | KO Increases WT Response ≥1.5-fold |
| 1417141_at   | NM_018738                        | 16145                                                                                                                                            | interferon gamma induced GTPase                                                                                                                                                                                                       | Irbp                 | 34.60          | 57.68          | 1.67                               | KO Increases WT Response ≥1.5-fold |
| 1419728_at   | NM_009141                        | 20311                                                                                                                                            | chemokine (C-X-C motif) ligand 5                                                                                                                                                                                                      | Cxcl5                | 28.99          | 55.52          | 1.92                               | KO Increases WT Response ≥1.5-fold |
| 1419394_s_at | NM_013650                        | 20201                                                                                                                                            | S100 calcium binding protein A8 (calgranulin A)                                                                                                                                                                                       | S100a8               | 28.64          | 47.75          | 1.67                               | KO Increases WT Response ≥1.5-fold |
| 1417793_at   | NM_019440                        | 54396                                                                                                                                            | interferon inducible GTPase 2                                                                                                                                                                                                         | Irbp2                | 24.93          | 37.66          | 1.51                               | KO Increases WT Response ≥1.5-fold |
| 1458589_at   | ---                              | ---                                                                                                                                              | ---                                                                                                                                                                                                                                   | ---                  | 24.21          | 52.53          | 2.17                               | KO Increases WT Response ≥1.5-fold |
| 1449984_at   | NM_009140                        | 20310                                                                                                                                            | chemokine (C-X-C motif) ligand 2                                                                                                                                                                                                      | Cxcl2                | 22.75          | 34.96          | 1.54                               | KO Increases WT Response ≥1.5-fold |
| 1450297_at   | NM_031168                        | 16193                                                                                                                                            | interleukin 6                                                                                                                                                                                                                         | Il6                  | 16.85          | 28.84          | 1.71                               | KO Increases WT Response ≥1.5-fold |
| 1428776_at   | NM_029415                        | 75750                                                                                                                                            | solute carrier family 10 (sodium/bile acid cotransporter family), member 6                                                                                                                                                            | Slc10a6              | 14.70          | 24.38          | 1.66                               | KO Increases WT Response ≥1.5-fold |
| 1417130_s_at | NM_020581                        | 57875                                                                                                                                            | angiopoietin-like 4                                                                                                                                                                                                                   | Anapt4               | 14.45          | 22.75          | 1.57                               | KO Increases WT Response ≥1.5-fold |
| 1453678_at   | NM_013594                        | 17190                                                                                                                                            | methyl-CpG binding domain protein 1                                                                                                                                                                                                   | Mbd1                 | 14.45          | 22.51          | 1.56                               | KO Increases WT Response ≥1.5-fold |
| 1419427_at   | NM_009971                        | 12985                                                                                                                                            | colony stimulating factor 3 (granulocyte)                                                                                                                                                                                             | Csf3                 | 14.20          | 24.72          | 1.74                               | KO Increases WT Response ≥1.5-fold |
| 1457666_s_at | 08327 // NM_0                    | 26388                                                                                                                                            | interferon activated gene 202B                                                                                                                                                                                                        | Ifi202b              | 13.38          | 23.22          | 1.74                               | KO Increases WT Response ≥1.5-fold |
| 1426858_at   | NM_008381                        | 16324                                                                                                                                            | inhibin beta-B                                                                                                                                                                                                                        | Inhb                 | 10.57          | 27.81          | 2.63                               | KO Increases WT Response ≥1.5-fold |
| 1424638_at   | NM_007669                        | 12575                                                                                                                                            | cyclin-dependent kinase inhibitor 1A (P21)                                                                                                                                                                                            | Cdkn1a               | 10.21          | 17.69          | 1.73                               | KO Increases WT Response ≥1.5-fold |
| 1452955_at   | NM_172845                        | 240913                                                                                                                                           | a disintegrin-like and metalloproteinase (reprolysin type) with thrombospondin type 1 motif, 4                                                                                                                                        | Adamts4              | 10.02          | 18.64          | 1.86                               | KO Increases WT Response ≥1.5-fold |
| 1416121_at   | NM_010728                        | 16948                                                                                                                                            | lysyl oxidase                                                                                                                                                                                                                         | Lox                  | 9.22           | 15.06          | 1.63                               | KO Increases WT Response ≥1.5-fold |
| 1421551_s_at | 08327 // NM_0                    | 26388                                                                                                                                            | interferon activated gene 202B                                                                                                                                                                                                        | Ifi202b              | 8.75           | 13.57          | 1.55                               | KO Increases WT Response ≥1.5-fold |
| 1448562_at   | NM_009477                        | 22271                                                                                                                                            | uridine phosphorylase 1                                                                                                                                                                                                               | Upp1                 | 8.51           | 12.75          | 1.50                               | KO Increases WT Response ≥1.5-fold |
| 1447285_at   | ---                              | ---                                                                                                                                              | ---                                                                                                                                                                                                                                   | ---                  | 7.58           | 12.88          | 1.70                               | KO Increases WT Response ≥1.5-fold |
| 1448881_at   | NM_017370                        | 15439                                                                                                                                            | haptoglobin                                                                                                                                                                                                                           | Hp                   | 7.31           | 17.51          | 2.40                               | KO Increases WT Response ≥1.5-fold |
| 1456907_at   | NM_008599                        | 17329                                                                                                                                            | chemokine (C-X-C motif) ligand 9                                                                                                                                                                                                      | Cxcl9                | 7.21           | 11.39          | 1.58                               | KO Increases WT Response ≥1.5-fold |
| 1434046_at   | NM_001004174                     | 433470                                                                                                                                           | expressed sequence AA467197                                                                                                                                                                                                           | AA467197             | 7.05           | 17             | 2.41                               | KO Increases WT Response ≥1.5-fold |
| 1441326_at   | NM_007552                        | 12870                                                                                                                                            | ceruloplasmin                                                                                                                                                                                                                         | Cp                   | 6.70           | 11.77          | 1.76                               | KO Increases WT Response ≥1.5-fold |
| 1457770_at   | NM_144808                        | 213053                                                                                                                                           | solute carrier family 39 (zinc transporter), member 14                                                                                                                                                                                | Slc39a14             | 6.24           | 10.48          | 1.68                               | KO Increases WT Response ≥1.5-fold |
| 1418471_at   | NM_008827                        | 18654                                                                                                                                            | placental growth factor                                                                                                                                                                                                               | Pgf                  | 5.95           | 9.61           | 1.62                               | KO Increases WT Response ≥1.5-fold |
| 1440481_at   | NM_009283                        | 20846                                                                                                                                            | signal transducer and activator of transcription 1                                                                                                                                                                                    | Stat1                | 5.85           | 10.43          | 1.78                               | KO Increases WT Response ≥1.5-fold |
| 1448290_at   | NM_011036                        | 18489                                                                                                                                            | pancreatitis-associated protein                                                                                                                                                                                                       | Pap                  | 5.81           | 11.02          | 1.90                               | KO Increases WT Response ≥1.5-fold |
| 1440999_at   | NM_172863                        | 242109                                                                                                                                           | zinc finger protein 697                                                                                                                                                                                                               | Zfp697               | 5.62           | 8.68           | 1.54                               | KO Increases WT Response ≥1.5-fold |
| 1448728_a_at | NM_030612                        | 80859                                                                                                                                            | nuclear factor of kappa light polypeptide gene enhancer in B-cells inhibitor, zeta                                                                                                                                                    | Nfkbiz               | 5.41           | 8.92           | 1.65                               | KO Increases WT Response ≥1.5-fold |
| 1418722_at   | NM_008694                        | 18054                                                                                                                                            | neutrophilic granule protein                                                                                                                                                                                                          | Ngp                  | 5.13           | 9.45           | 1.84                               | KO Increases WT Response ≥1.5-fold |
| 1421854_at   | NM_008013                        | 14190                                                                                                                                            | fibrinogen-like protein 2                                                                                                                                                                                                             | Fol2                 | 5.12           | 9.87           | 1.93                               | KO Increases WT Response ≥1.5-fold |
| 1422411_s_at | _007894 // NM_ / 13587 // 503845 | 14190                                                                                                                                            | eosinophil-associated, ribonuclease A family, member 1 // eosinophil-associated, ribonuclease A family, member 2 // eosinophil-associated, ribonuclease A family, member 3 // eosinophil-associated, ribonuclease A family, member 12 | Ear2 // Ear3 // Ear4 | 4.53           | 6.94           | 1.53                               | KO Increases WT Response ≥1.5-fold |
| 1448793_a_at | NM_011521                        | 20971                                                                                                                                            | syndecan 4                                                                                                                                                                                                                            | Sdc4                 | 4.50           | 7.92           | 1.80                               | KO Increases WT Response ≥1.5-fold |
| 1449227_at   | NM_009890                        | 12642                                                                                                                                            | cholesterol 25-hydroxylase                                                                                                                                                                                                            | Ch25h                | 4.30           | 6.48           | 1.51                               | KO Increases WT Response ≥1.5-fold |
| 1455271_at   | XM_885087                        | 620695                                                                                                                                           | hypothetical protein LOC620695                                                                                                                                                                                                        | LOC620695            | 4.26           | 8.01           | 1.88                               | KO Increases WT Response ≥1.5-fold |
| 1440173_x_at | NM_011347                        | 20344                                                                                                                                            | selectin, platelet                                                                                                                                                                                                                    | Selp                 | 4.23           | 7.43           | 1.76                               | KO Increases WT Response ≥1.5-fold |
| 1436100_at   | // XM_914492 //                  | 230863                                                                                                                                           | SH2 domain containing 5                                                                                                                                                                                                               | Sh2d5                | 4.20           | 6.58           | 1.57                               | KO Increases WT Response ≥1.5-fold |
| 1449901_a_at | NM_016693                        | 53608                                                                                                                                            | mitogen-activated protein kinase kinase kinase 6                                                                                                                                                                                      | Map3k6               | 4.19           | 7.92           | 1.89                               | KO Increases WT Response ≥1.5-fold |
| 1417496_at   | NM_007752                        | 12870                                                                                                                                            | ceruloplasmin                                                                                                                                                                                                                         | Cp                   | 4.13           | 7.59           | 1.84                               | KO Increases WT Response ≥1.5-fold |
| 1455257_at   | NM_016780                        | 16416                                                                                                                                            | integrin beta 3                                                                                                                                                                                                                       | Itgb3                | 4.02           | 7.59           | 1.89                               | KO Increases WT Response ≥1.5-fold |
| 1449340_at   | NM_025312                        | 66042                                                                                                                                            | sclerostin domain containing 1                                                                                                                                                                                                        | Sostdc1              | 3.99           | 6.04           | 1.51                               | KO Increases WT Response ≥1.5-fold |
| 1421731_a_at | NM_007999                        | 14196                                                                                                                                            | flap structure specific endonuclease 1                                                                                                                                                                                                | Fen1                 | 3.95           | 6.88           | 1.74                               | KO Increases WT Response ≥1.5-fold |
| 1435137_s_at | NR_002860 / 319269 // 319443     | RIKEN cDNA 1200015M12 gene // RIKEN cDNA 1200016E24 gene // RIKEN cDNA E430024C06 gene                                                           | 6E24Rik // A130040                                                                                                                                                                                                                    | 3.93                 | 6.96           | 1.77           | KO Increases WT Response ≥1.5-fold |                                    |
| 1443721_x_at | NM_183426                        | 216161                                                                                                                                           | strawberry notch homolog (Drosophila)                                                                                                                                                                                                 | Stno                 | 3.93           | 6.74           | 1.72                               | KO Increases WT Response ≥1.5-fold |
| 1422473_at   | NM_019840                        | 18578                                                                                                                                            | phosphodiesterase 4B, cAMP specific                                                                                                                                                                                                   | Pde4b                | 3.88           | 6.35           | 1.64                               | KO Increases WT Response ≥1.5-fold |
| 1428909_at   | NR_002860                        | 319269                                                                                                                                           | RIKEN cDNA A130040M12 gene                                                                                                                                                                                                            | A130040M12Rik        | 3.86           | 5.99           | 1.55                               | KO Increases WT Response ≥1.5-fold |
| 1441858_at   | NM_030724                        | 80914                                                                                                                                            | Uridine-cytidine kinase 2                                                                                                                                                                                                             | Uck2                 | 3.80           | 6.21           | 1.63                               | KO Increases WT Response ≥1.5-fold |
| 1430352_at   | NM_175209                        | 74516                                                                                                                                            | RIKEN cDNA 8430417A20 gene                                                                                                                                                                                                            | 8430417A20Rik        | 3.78           | 6.6            | 1.75                               | KO Increases WT Response ≥1.5-fold |
| 1435640_x_at | NR_002860                        | 319269                                                                                                                                           | RIKEN cDNA A130040M12 gene                                                                                                                                                                                                            | A130040M12Rik        | 3.67           | 6.2            | 1.69                               | KO Increases WT Response ≥1.5-fold |
| 1441150_x_at | ---                              | ---                                                                                                                                              | Transcribed locus                                                                                                                                                                                                                     | ---                  | 3.51           | 5.49           | 1.56                               | KO Increases WT Response ≥1.5-fold |
| 1418094_s_at | NM_007607                        | 12351                                                                                                                                            | carbonic anhydrase 4                                                                                                                                                                                                                  | Car4                 | 3.47           | 7.37           | 2.12                               | KO Increases WT Response ≥1.5-fold |
| 1427932_s_at | NR_002860 / 269 // 319443 // 7   | RIKEN cDNA 12000310 gene // RIKEN cDNA 1200015M12 gene // RIKEN cDNA 1200016E24 gene // RIKEN cDNA A130040M12 gene // RIKEN cDNA E430024C06 gene | // 1200016E24Rik //                                                                                                                                                                                                                   | 3.45                 | 7.2            | 2.09           | KO Increases WT Response ≥1.5-fold |                                    |
| 1422474_at   | NM_019840                        | 18578                                                                                                                                            | phosphodiesterase 4B, cAMP specific                                                                                                                                                                                                   | Pde4b                | 3.43           | 6.18           | 1.80                               | KO Increases WT Response ≥1.5-fold |
| 1448949_at   | NM_007607                        | 12351                                                                                                                                            | carbonic anhydrase 4                                                                                                                                                                                                                  | Car4                 | 3.32           | 5.93           | 1.79                               | KO Increases WT Response ≥1.5-fold |
| 1419149_at   | NM_008871                        | 18787                                                                                                                                            | serine (or cysteine) peptidase inhibitor, clade E, member 1                                                                                                                                                                           | Serpine1             | 3.28           | 6.09           | 1.86                               | KO Increases WT Response ≥1.5-fold |
| 1425503_at   | // NM_023887 //                  | 14538                                                                                                                                            | glucosaminyl (N-acetyl) transferase 2, l-branching enzyme                                                                                                                                                                             | Gcnt2                | 3.21           | 4.8            | 1.50                               | KO Increases WT Response ≥1.5-fold |
| 1415897_a_at | NM_019946                        | 56615                                                                                                                                            | microsomal glutathione S-transferase 1                                                                                                                                                                                                | Mgst1                | 3.18           | 5.13           | 1.61                               | KO Increases WT Response ≥1.5-fold |
| 1426808_at   | NM_010705                        | 16854                                                                                                                                            | lectin, galactose binding, soluble 3                                                                                                                                                                                                  | Lgal3                | 3.15           | 5.23           | 1.66                               | KO Increases WT Response ≥1.5-fold |
| 1453238_s_at | NR_002860 / 319269 // 319443     | RIKEN cDNA 3930401B19 gene // RIKEN cDNA 1200016E24 gene // RIKEN cDNA A130040M12 gene // RIKEN cDNA E430024C06 gene                             | 6E24Rik // A130040                                                                                                                                                                                                                    | 3.11                 | 5.58           | 1.79           | KO Increases WT Response ≥1.5-fold |                                    |
| 1440865_at   | NM_001033632                     | 213002                                                                                                                                           | interferon induced transmembrane protein 6                                                                                                                                                                                            | Ifitm6               | 3.07           | 4.74           | 1.54                               | KO Increases WT Response ≥1.5-fold |
| 1424759_at   | NM_026549                        | 66412                                                                                                                                            | arrestin domain containing 4                                                                                                                                                                                                          | Ardc4                | 3.02           | 4.93           | 1.63                               | KO Increases WT Response ≥1.5-fold |
| 1438148_at   | NM_203320                        | 330122                                                                                                                                           | gene model 1960, (NCBI)                                                                                                                                                                                                               | Gm1960               | 2.99           | 5.02           | 1.68                               | KO Increases WT Response ≥1.5-fold |
| 1450716_at   | NM_009621                        | 11504                                                                                                                                            | a disintegrin-like and metalloproteinase (reprolysin type) with thrombospondin type 1 motif, 1                                                                                                                                        | Adamts1              | 2.88           | 4.98           | 1.73                               | KO Increases WT Response ≥1.5-fold |
| 1428636_at   | 19422 // XM_9                    | 74051                                                                                                                                            | six transmembrane epithelial antigen of prostate 2                                                                                                                                                                                    | Steap2               | 2.82           | 5.95           | 2.11                               | KO Increases WT Response ≥1.5-fold |
| 1420831_at   | 1024945 // NM                    | 104009                                                                                                                                           | quiescin Q6                                                                                                                                                                                                                           | Oscn6                | 2.70           | 4.24           | 1.57                               | KO Increases WT Response ≥1.5-fold |
| 1448452_at   | NM_008320                        | 15900                                                                                                                                            | interferon regulatory factor 8                                                                                                                                                                                                        | Irf8                 | 2.69           | 4.42           | 1.64                               | KO Increases WT Response ≥1.5-fold |
| 1442018_at   | ---                              | 103207                                                                                                                                           | expressed sequence A1426953                                                                                                                                                                                                           | A1426953             | 2.63           | 4.69           | 1.78                               | KO Increases WT Response ≥1.5-fold |
| 1417400_at   | NM_030690                        | 75646                                                                                                                                            | retinoic acid induced 14                                                                                                                                                                                                              | Rai14                | 2.63           | 3.94           | 1.50                               | KO Increases WT Response ≥1.5-fold |
| 1437785_at   | ---                              | 101401                                                                                                                                           | a disintegrin-like and metalloproteinase (reprolysin type) with thrombospondin type 1 motif, 9                                                                                                                                        | Adamts9              | 2.60           | 4.54           | 1.75                               | KO Increases WT Response ≥1.5-fold |
| 1417654_at   | NM_011521                        | 20971                                                                                                                                            | syndecan 4                                                                                                                                                                                                                            | Sdc4                 | 2.58           | 4.87           | 1.89                               | KO Increases WT Response ≥1.5-fold |
| 1451160_s_at | NM_027514                        | 52116                                                                                                                                            | poliovirus receptor                                                                                                                                                                                                                   | Pvr                  | 2.57           | 4.04           | 1.57                               | KO Increases WT Response ≥1.5-fold |
| 1449996_a_at | NM_022314                        | 59069                                                                                                                                            | tropomyosin 3, gamma                                                                                                                                                                                                                  | Tpm3                 | 2.51           | 3.84           | 1.53                               | KO Increases WT Response ≥1.5-fold |
| 1458351_s_at | NM_178633                        | 77113                                                                                                                                            | kelch-like 2, Mayven (Drosophila)                                                                                                                                                                                                     | Khl2                 | 2.48           | 4.32           | 1.74                               | KO Increases WT Response ≥1.5-fold |
| 1423393_at   | NM_013885                        | 29876                                                                                                                                            | chloride intracellular channel 4 (mitochondrial)                                                                                                                                                                                      | Cic4                 | 2.47           | 4.12           | 1.67                               | KO Increases WT Response ≥1.5-fold |
| 1428671_at   | ---                              | 72275                                                                                                                                            | RIKEN cDNA 220002D01 gene                                                                                                                                                                                                             | 220002D01Rik         | 2.42           | 3.76           | 1.55                               | KO Increases WT Response ≥1.5-fold |
| 1437247_at   | 08037 // XM_9                    | 14284 // 634417                                                                                                                                  | fos-like antigen 2 // similar to fos-like antigen 2                                                                                                                                                                                   | Fosl2 // LOC634417   | 2.40           | 3.96           | 1.65                               | KO Increases WT Response ≥1.5-fold |
| 1441228_at   | // XM_905672 //                  | 381823                                                                                                                                           | apolipoprotein L domain containing 1                                                                                                                                                                                                  | Apol1                | 2.38           | 3.57           | 1.50                               | KO Increases WT Response ≥1.5-fold |
| 1431399_at   | ---                              | 101401                                                                                                                                           | a disintegrin-like and metalloproteinase (reprolysin type) with thrombospondin type 1 motif, 9                                                                                                                                        | Adamts9              | 2.33           | 3.88           | 1.67                               | KO Increases WT Response ≥1.5-fold |
| 1426501_a_at | NM_145133                        | 211550                                                                                                                                           | Traf2 binding protein                                                                                                                                                                                                                 | T2bp                 | 2.32           | 3.97           | 1.71                               | KO Increases WT Response ≥1.5-fold |
| 1457575_at   | ---                              | 99209                                                                                                                                            | expressed sequence AU021128                                                                                                                                                                                                           | AU021128             | 2.24           | 4.07           | 1.82                               | KO Increases WT Response ≥1.5-fold |



|              |                |                |                                                                                                                               |                |       |       |       |                                    |
|--------------|----------------|----------------|-------------------------------------------------------------------------------------------------------------------------------|----------------|-------|-------|-------|------------------------------------|
| 1443115_at   | 09371 // NM_0  | 21813          | Transforming growth factor, beta receptor II                                                                                  | Tgfb2          | 1.25  | 1.97  | 1.58  | KO increases WT Response ≥1.5-fold |
| 1444763_at   | NM_008983      | 19272          | protein tyrosine phosphatase, receptor type, K                                                                                | Ptk7           | 1.25  | 1.9   | 1.52  | KO increases WT Response ≥1.5-fold |
| 1425514_at   | 1024955 // NM  | 18708          | phosphatidylinositol 3-kinase, regulatory subunit, polypeptide 1 (p85 alpha)                                                  | Pik3r1         | 1.22  | 1.9   | 1.56  | KO increases WT Response ≥1.5-fold |
| 1434660_at   | ---            | 211064         | alkB, alkyltion repair homolog 1 (E. coli)                                                                                    | Alkbh1         | 1.22  | 1.86  | 1.52  | KO increases WT Response ≥1.5-fold |
| 1422570_at   | NM_009537      | 22632          | YY1 transcription factor                                                                                                      | Yy1            | 1.22  | 1.84  | 1.51  | KO increases WT Response ≥1.5-fold |
| 1438501_at   | NM_009092      | 20068          | Ribosomal protein S17                                                                                                         | Rps17          | 1.20  | 2.05  | 1.71  | KO increases WT Response ≥1.5-fold |
| 1441604_at   | NM_016903      | 13885          | Esterase D/formylglutathione hydrolase                                                                                        | Esd            | 1.17  | 1.73  | 1.48  | KO and Not WT Responder            |
| 1454780_at   | NM_173739      | 233733         | UDP-N-acetyl-alpha-D-galactosamine:polypeptide N-acetylglucosaminyltransferase-like 4                                         | Gainf4         | 1.11  | 1.62  | 1.46  | KO and Not WT Responder            |
| 1454967_at   | ---            | ---            | Transcribed locus                                                                                                             | ---            | 1.11  | -1.52 | -1.37 | KO and Not WT Responder            |
| 1437318_at   | NM_008778      | 18481          | p21 (CDKN1A)-activated kinase 3                                                                                               | PaK3           | 1.08  | 1.92  | 1.78  | KO and Not WT Responder            |
| 1423846_x_at | NM_011654      | 22143          | tubulin, alpha 2                                                                                                              | Tuba2          | 1.08  | 1.75  | 1.62  | KO and Not WT Responder            |
| 1436158_at   | NM_010124      | 13688          | eukaryotic translation initiation factor 4E binding protein 2                                                                 | Eif4ebp2       | 1.08  | 1.68  | 1.56  | KO and Not WT Responder            |
| 1439486_at   | ---            | ---            | Transcribed locus                                                                                                             | ---            | 1.08  | 1.67  | 1.55  | KO and Not WT Responder            |
| 1449550_at   | NM_008659      | 17913          | myosin IC                                                                                                                     | Myo1c          | 1.06  | 1.56  | 1.47  | KO and Not WT Responder            |
| 1456528_at   | ---            | ---            | Transcribed locus, weakly similar to NP_665733.1 Lipogelin [Rattus norvegicus]                                                | ---            | 1.06  | -1.75 | -1.65 | KO and Not WT Responder            |
| 1429639_at   | 27096 // NM_0  | 74182          | preimplantation protein 4                                                                                                     | Prel4          | -1.26 | -2.15 | 1.71  | KO increases WT Response ≥1.5-fold |
| 1433827_at   | 1038999 // NM  | 11980          | ATPase, aminophospholipid transporter (APLT), class 1, type 8A, member 1                                                      | Atp8a1         | -1.26 | -1.96 | 1.56  | KO increases WT Response ≥1.5-fold |
| 1450004_at   | NM_021367      | 53603          | thymic stromal lymphopoietin                                                                                                  | Tslp           | -1.31 | -1.96 | 1.50  | KO increases WT Response ≥1.5-fold |
| 1435292_at   | // XM 919023 / | 210789         | TBC1 domain family, member 4                                                                                                  | Tbc1d4         | -1.33 | -1.99 | 1.50  | KO increases WT Response ≥1.5-fold |
| 1442169_at   | NM_013703      | 22359          | very low density lipoprotein receptor                                                                                         | Vldlr          | -1.36 | -2.06 | 1.51  | KO increases WT Response ≥1.5-fold |
| 1452973_at   | NM_175523      | 243382         | protein phosphatase 1K (PP2C domain containing)                                                                               | Ppm1k          | -1.37 | -2.29 | 1.67  | KO increases WT Response ≥1.5-fold |
| 1460332_at   | NM_023129      | 18821          | phospholamban                                                                                                                 | Pln            | -1.38 | -2.1  | 1.52  | KO increases WT Response ≥1.5-fold |
| 1418935_at   | NM_009344      | 21924          | pleckstrin homology-like domain, family A, member 1                                                                           | Phlda1         | -1.40 | -2.31 | 1.65  | KO increases WT Response ≥1.5-fold |
| 1429083_at   | 23830 // XM 9  | 77559          | amylase-1, beta-glucosidase, 4-alpha-glucanotransferase                                                                       | Aat            | -1.40 | -2.2  | 1.57  | KO increases WT Response ≥1.5-fold |
| 1454647_at   | NM_175324      | 102632         | acyl-Coenzyme A dehydrogenase family, member 11                                                                               | Acad11         | -1.42 | -2.18 | 1.54  | KO increases WT Response ≥1.5-fold |
| 1418314_a_at | 21477 // NM 1  | 268859         | ataxin 2 binding protein 1                                                                                                    | A2bp1          | -1.44 | -2.49 | 1.73  | KO increases WT Response ≥1.5-fold |
| 1415854_at   | NM_013598      | 17311          | kit ligand                                                                                                                    | Kitl           | -1.45 | -2.27 | 1.57  | KO increases WT Response ≥1.5-fold |
| 1424178_at   | NM_144534      | 74166          | transmembrane protein 38a                                                                                                     | Tmem38a        | -1.49 | -2.7  | 1.81  | KO increases WT Response ≥1.5-fold |
| 1449118_at   | NM_010022      | 13171          | dihydroliipoamide branched chain transacylase E2                                                                              | Dbt            | -1.50 | -2.28 | 1.52  | KO increases WT Response ≥1.5-fold |
| 1418589_a_at | 1039543 // NM  | 17349          | myeloid leukemia factor 1                                                                                                     | Mif1           | -1.55 | -2.47 | 1.59  | KO increases WT Response ≥1.5-fold |
| 1455301_at   | XM_620310      | 330319         | expressed sequence BQ952480                                                                                                   | BQ952480       | -1.56 | -2.83 | 1.81  | KO increases WT Response ≥1.5-fold |
| 1418944_at   | NM_021476      | 58861          | cysteine leukotriene receptor 1                                                                                               | Cysl1r         | -1.56 | -2.63 | 1.69  | KO increases WT Response ≥1.5-fold |
| 1448557_at   | NM_024244      | 71721          | RIKEN cDNA 1200015N20 gene                                                                                                    | 1200015N20Rik  | -1.57 | -3.04 | 1.94  | KO increases WT Response ≥1.5-fold |
| 1460281_at   | NM_080847      | 78910          | ankyrin repeat and SOCS box-containing protein 15                                                                             | Asb15          | -1.57 | -2.77 | 1.76  | KO increases WT Response ≥1.5-fold |
| 1441389_at   | ---            | ---            | Transcribed locus                                                                                                             | ---            | -1.57 | -2.35 | 1.50  | KO increases WT Response ≥1.5-fold |
| 1452179_at   | NM_172303      | 269424         | PHD finger protein 17                                                                                                         | Phf17          | -1.59 | -2.51 | 1.58  | KO increases WT Response ≥1.5-fold |
| 1454855_at   | // XM 001000   | 50791          | membrane associated guanlylate kinase, WW and PDZ domain containing 2                                                         | Maq12          | -1.59 | -2.82 | 1.52  | KO increases WT Response ≥1.5-fold |
| 1454350_at   | NM_175515      | 380614         | PDZ domain containing 6                                                                                                       | Pdzd6          | -1.61 | -2.47 | 1.78  | KO increases WT Response ≥1.5-fold |
| 1429228_at   | NM_181815      | 75216          | RIKEN cDNA 4930534B04 gene                                                                                                    | 4930534B04Rik  | -1.64 | -2.95 | 1.80  | KO increases WT Response ≥1.5-fold |
| 1450710_at   | NM_021878      | 16468          | jumonji, AT rich interactive domain 2                                                                                         | Jarid2         | -1.64 | -2.58 | 1.57  | KO increases WT Response ≥1.5-fold |
| 1432944_at   | ---            | 73027          | RIKEN cDNA 2900046L07 gene                                                                                                    | 2900046L07Rik  | -1.65 | -3.48 | 2.11  | KO increases WT Response ≥1.5-fold |
| 1438724_at   | NM_027881      | 71720          | oxysterol binding protein-like 3                                                                                              | Osbpl3         | -1.67 | -2.75 | 1.65  | KO increases WT Response ≥1.5-fold |
| 1449466_at   | NM_011606      | 21922          | C-type lectin domain family 3, member b                                                                                       | Clec3b         | -1.67 | -2.52 | 1.51  | KO increases WT Response ≥1.5-fold |
| 1428996_at   | NM_00102400K   | 382051         | RIKEN cDNA 4833426J09 gene                                                                                                    | 4833426J09Rik  | -1.68 | -2.98 | 1.77  | KO increases WT Response ≥1.5-fold |
| 1449893_at   | NM_008584      | 19007          | neogenin                                                                                                                      | Neo1           | -1.68 | -2.68 | 1.68  | KO increases WT Response ≥1.5-fold |
| 1415959_at   | NM_009204      | 20528          | solute carrier family 2 (facilitated glucose transporter), member 4                                                           | Slc2a4         | -1.70 | -3.29 | 1.84  | KO increases WT Response ≥1.5-fold |
| 1443406_at   | NM_178711      | 235527         | phospholipid scramblase 4                                                                                                     | Plscr4         | -1.70 | -3.1  | 1.92  | KO increases WT Response ≥1.5-fold |
| 1457066_at   | NM_011510      | 20927          | ATP-binding cassette, sub-family C (CFTR/MRP), member 8                                                                       | Abcc8          | -1.70 | -2.99 | 1.76  | KO increases WT Response ≥1.5-fold |
| 1455244_at   | 26102 // NM 1  | 208846         | dishevelled associated activator of morphogenesis 1                                                                           | Daam1          | -1.71 | -2.61 | 1.53  | KO increases WT Response ≥1.5-fold |
| 1455091_at   | 13 // XM_9201  | 235542         | RIKEN cDNA 3222402P14 gene                                                                                                    | 3222402P14Rik  | -1.72 | -2.65 | 1.54  | KO increases WT Response ≥1.5-fold |
| 1443932_at   | NM_178253      | 271005         | kelch domain containing 1                                                                                                     | Klhdc1         | -1.75 | -3.23 | 1.85  | KO increases WT Response ≥1.5-fold |
| 1449407_at   | NM_009879      | 12589          | intraflagellar transport 81 homolog (Chlamydomonas)                                                                           | Ifit81         | -1.75 | -3.17 | 1.81  | KO increases WT Response ≥1.5-fold |
| 1425344_at   | NM_026272      | 67608          | nuclear prelamin A recognition factor                                                                                         | Narf           | -1.75 | -2.69 | 1.54  | KO increases WT Response ≥1.5-fold |
| 1425342_a_at | NM_010608      | 16527          | potassium channel, subfamily K, member 3                                                                                      | Kcnk3          | -1.77 | -3.1  | 1.75  | KO increases WT Response ≥1.5-fold |
| 1422927_at   | NM_023784      | 75581          | Yip1 domain family, member 7                                                                                                  | Yip7           | -1.77 | -2.78 | 1.57  | KO increases WT Response ≥1.5-fold |
| 1421966_at   | NM_008173      | 14815          | nuclear receptor subfamily 3, group C, member 1                                                                               | Nr3c1          | -1.79 | -2.74 | 1.53  | KO increases WT Response ≥1.5-fold |
| 1424869_at   | NM_026752      | 68520          | zinc finger, FYVE domain containing 21                                                                                        | Zfyve21        | -1.82 | -3.57 | 1.96  | KO increases WT Response ≥1.5-fold |
| 1460662_at   | NM_011067      | 18628          | period homolog 3 (Drosophila)                                                                                                 | Per3           | -1.82 | -2.93 | 1.61  | KO increases WT Response ≥1.5-fold |
| 1424670_s_at | NM_026752      | 68520          | zinc finger, FYVE domain containing 21                                                                                        | Zfyve21        | -1.82 | -2.81 | 1.54  | KO increases WT Response ≥1.5-fold |
| 1451606_at   | NM_177039      | 319942         | RIKEN cDNA A530016L24 gene                                                                                                    | A530016L24Rik  | -1.82 | -2.78 | 1.53  | KO increases WT Response ≥1.5-fold |
| 1425870_a_at | // NM 145703 / | 80906          | Kv channel-interacting protein 2                                                                                              | Kcnip2         | -1.84 | -4.63 | 2.52  | KO increases WT Response ≥1.5-fold |
| 1429918_at   | NM_175535      | 244867         | Rho GTPase activating protein 20                                                                                              | Arhgap20       | -1.84 | -3.81 | 2.07  | KO increases WT Response ≥1.5-fold |
| 1419286_s_at | NM_009879      | 12589          | intraflagellar transport 81 homolog (Chlamydomonas)                                                                           | Ifit81         | -1.84 | -3.39 | 1.84  | KO increases WT Response ≥1.5-fold |
| 1458040_at   | ---            | 28017          | DNA segment, Chr 7, Wayne State University 130, expressed                                                                     | D7Wsu130e      | -1.86 | -3.86 | 2.08  | KO increases WT Response ≥1.5-fold |
| 1421471_at   | NM_010934      | 18166          | neuroepitide Y receptor Y1                                                                                                    | Npy1r          | -1.86 | -2.9  | 1.56  | KO increases WT Response ≥1.5-fold |
| 1457354_at   | NM_172946      | 268481         | RIKEN cDNA 6330509G02 gene                                                                                                    | 6330509G02Rik  | -1.86 | -2.89 | 1.52  | KO increases WT Response ≥1.5-fold |
| 1427213_at   | NM_008824      | 18639          | 6-phosphofructo-2-kinase/fructose-2,6-bisphosphatase 1                                                                        | Pfkfb1         | -1.86 | -3.18 | 1.66  | KO increases WT Response ≥1.5-fold |
| 1434581_at   | ---            | ---            | ---                                                                                                                           | ---            | -1.92 | -3.13 | 1.63  | KO increases WT Response ≥1.5-fold |
| 1457177_at   | NM_013646      | 19883          | RAR-related orphan receptor alpha                                                                                             | Rora           | -1.92 | -3.04 | 1.58  | KO increases WT Response ≥1.5-fold |
| 1419417_at   | NM_009506      | 22341          | vascular endothelial growth factor C                                                                                          | Vegfc          | -1.93 | -3.19 | 1.65  | KO increases WT Response ≥1.5-fold |
| 1451119_a_at | NM_010180      | 14114          | fibulin 1                                                                                                                     | Fbln1          | -1.94 | -2.91 | 1.50  | KO increases WT Response ≥1.5-fold |
| 1438201_at   | NM_00103345C   | 381511         | protein phosphatase 2C, magnesium dependent, catalytic subunit                                                                | Ppm2c          | -1.98 | -3.24 | 1.64  | KO increases WT Response ≥1.5-fold |
| 1452431_s_at | 10378 // NM_0  | 14960 // 14968 | histocompatibility 2, class II antigen A, alpha // histocompatibility 2, class II antigen E, alpha                            | H2-Aa // H2-Ea | -1.99 | -3.03 | 1.52  | KO increases WT Response ≥1.5-fold |
| 1449547_at   | NM_080856      | 142687         | ankyrin repeat and SOCS box-containing protein 14                                                                             | Asb14          | -2.06 | -4.04 | 1.96  | KO increases WT Response ≥1.5-fold |
| 1444153_at   | ---            | ---            | 16 days neonate heart cDNA, RIKEN full-length enriched library, clone:D830033B01 product:unclassifiable, full insert sequence | ---            | -2.07 | -3.84 | 1.86  | KO increases WT Response ≥1.5-fold |
| 1435911_s_at | NM_178934      | 353169         | solute carrier family 2 (facilitated glucose transporter), member 12                                                          | Slc2a12        | -2.09 | -4.08 | 1.95  | KO increases WT Response ≥1.5-fold |
| 1422438_at   | NM_010145      | 13849          | epoxide hydrolase 1, microsomal                                                                                               | Ephx1          | -2.10 | -4.26 | 2.03  | KO increases WT Response ≥1.5-fold |
| 1450967_at   | NM_025760      | 66775          | protein tyrosine phosphatase-like A domain containing 2                                                                       | Ptldad2        | -2.10 | -3.29 | 1.57  | KO increases WT Response ≥1.5-fold |
| 1449884_at   | NM_026626      | 68226          | EF-hand calcium binding domain 2                                                                                              | Efcab2         | -2.11 | -3.65 | 1.73  | KO increases WT Response ≥1.5-fold |
| 1453552_at   | ---            | 69631          | RIKEN cDNA 2310014F07 gene                                                                                                    | 2310014F07Rik  | -2.14 | -4.4  | 2.06  | KO increases WT Response ≥1.5-fold |
| 1427546_at   | NM_013851      | 27404          | ATP-binding cassette, sub-family A (ABC1), member 8b                                                                          | Abca8b         | -2.15 | -3.76 | 1.75  | KO increases WT Response ≥1.5-fold |
| 1440635_at   | // XM 974432 / | 72333          | palladin, cytoskeletal associated protein                                                                                     | Pallid         | -2.16 | -3.64 | 1.69  | KO increases WT Response ≥1.5-fold |
| 1443824_s_at | NM_053070      | 12354          | carbonic anhydrase 7                                                                                                          | Car7           | -2.20 | -3.29 | 1.50  | KO increases WT Response ≥1.5-fold |
| 1453135_at   | NM_027402      | 384061         | fibronectin type III domain containing 5                                                                                      | Fndc5          | -2.28 | -3.92 | 1.72  | KO increases WT Response ≥1.5-fold |
| 1435605_at   | NM_00100436E   | 242894         | ARP3 actin-related protein 3 homolog B (yeast)                                                                                | Actr3b         | -2.30 | -3.93 | 1.71  | KO increases WT Response ≥1.5-fold |
| 1456395_at   | NM_008904      | 19017          | peroxisome proliferative activated receptor, gamma, coactivator 1 alpha                                                       | Ppargc1a       | -2.32 | -3.83 | 1.65  | KO increases WT Response ≥1.5-fold |
| 1435194_at   | ---            | ---            | ---                                                                                                                           | ---            | -2.36 | -3.7  | 1.57  | KO increases WT Response ≥1.5-fold |
| 1417673_at   | NM_016719      | 50915          | growth factor receptor bound protein 14                                                                                       | Grb14          | -2.37 | -3.59 | 1.51  | KO increases WT Response ≥1.5-fold |

|              |                 |        |                                                                          |               |       |        |      |                                    |
|--------------|-----------------|--------|--------------------------------------------------------------------------|---------------|-------|--------|------|------------------------------------|
| 1460003_at   | ---             | 99132  | expressed sequence AI956758                                              | AI956758      | -2.40 | -3.65  | 1.52 | KO Increases WT Response ≥1.5-fold |
| 1436275_at   | ---             | ---    | ---                                                                      | ---           | -2.43 | -4.55  | 1.87 | KO Increases WT Response ≥1.5-fold |
| 1422983_at   | NM_021359       | 16420  | integrin beta 6                                                          | Itgb6         | -2.44 | -3.98  | 1.63 | KO Increases WT Response ≥1.5-fold |
| 1434237_at   | NM_175309       | 100647 | uroplakin 3B                                                             | Upk3b         | -2.46 | -4.83  | 1.96 | KO Increases WT Response ≥1.5-fold |
| 1434735_at   | NM_172563       | 217082 | hepatic leukemia factor                                                  | Hlf           | -2.48 | -4.57  | 1.84 | KO Increases WT Response ≥1.5-fold |
| 1418311_at   | I038699 // NM   | 63828  | fructosamine 3 kinase                                                    | Fn3k          | -2.48 | -4.28  | 1.73 | KO Increases WT Response ≥1.5-fold |
| 1425631_at   | NM_016854       | 53412  | protein phosphatase 1, regulatory (inhibitor) subunit 3C                 | Ppp1r3c       | -2.49 | -3.84  | 1.54 | KO Increases WT Response ≥1.5-fold |
| 1421087_at   | NM_011067       | 18628  | period homolog 3 (Drosophila)                                            | Per3          | -2.56 | -4.28  | 1.67 | KO Increases WT Response ≥1.5-fold |
| 1428812_at   | NM_028491       | 73287  | RIKEN cDNA 1700040L02 gene                                               | 1700040L02Rik | -2.59 | -4.17  | 1.61 | KO Increases WT Response ≥1.5-fold |
| 1449469_at   | NM_016927       | 53871  | polycystic kidney disease 2-like 2                                       | Pkd2l2        | -2.60 | -5.43  | 2.09 | KO Increases WT Response ≥1.5-fold |
| 1432107_at   | NM_183283       | 69576  | RIKEN cDNA 2310010M20 gene                                               | 2310010M20Rik | -2.62 | -4.24  | 1.62 | KO Increases WT Response ≥1.5-fold |
| 1451527_at   | NM_023620       | 76477  | procollagen C-endopeptidase enhancer 2                                   | Pcolce2       | -2.63 | -4.24  | 1.61 | KO Increases WT Response ≥1.5-fold |
| 1452249_at   | NM_001033217    | 106042 | prickle like 1 (Drosophila)                                              | Prickle1      | -2.64 | -4.01  | 1.52 | KO Increases WT Response ≥1.5-fold |
| 1440739_at   | NM_009506       | 22341  | vascular endothelial growth factor C                                     | Vefc          | -2.69 | -4.17  | 1.55 | KO Increases WT Response ≥1.5-fold |
| 1447174_at   | I038610 // NM   | 13134  | Dachshund 1 (Drosophila)                                                 | Dach1         | -2.69 | -4.06  | 1.51 | KO Increases WT Response ≥1.5-fold |
| 1439836_at   | NM_080847       | 78910  | ankyrin repeat and SOCS box-containing protein 15                        | Asb15         | -2.82 | -8.15  | 2.89 | KO Increases WT Response ≥1.5-fold |
| 1453839_a_at | NM_023734       | 74116  | peptidase inhibitor 16                                                   | Pi16          | -2.92 | -4.5   | 1.54 | KO Increases WT Response ≥1.5-fold |
| 1455090_at   | ---             | ---    | ---                                                                      | ---           | -2.98 | -4.77  | 1.60 | KO Increases WT Response ≥1.5-fold |
| 1425753_a_at | I040691 // NM   | 22256  | uracil DNA glycosylase                                                   | Unq           | -3.08 | -5.29  | 1.72 | KO Increases WT Response ≥1.5-fold |
| 1430269_at   | NM_026831       | 68753  | RIKEN cDNA 1110037P11 gene                                               | 1110037P11Rik | -3.13 | -5.1   | 1.63 | KO Increases WT Response ≥1.5-fold |
| 1428758_at   | NM_028436       | 67893  | transmembrane protein 86A                                                | Tmem86a       | -3.19 | -5.39  | 1.69 | KO Increases WT Response ≥1.5-fold |
| 1453924_a_at | NM_008966       | 19220  | prostaglandin F receptor                                                 | Ptatr         | -3.22 | -5.18  | 1.61 | KO Increases WT Response ≥1.5-fold |
| 1421928_at   | NM_007936       | 13838  | Eph receptor A4                                                          | Epha4         | -3.27 | -5.02  | 1.54 | KO Increases WT Response ≥1.5-fold |
| 1450065_at   | ---             | ---    | ---                                                                      | ---           | -3.36 | -5.86  | 1.74 | KO Increases WT Response ≥1.5-fold |
| 1444025_at   | ---             | ---    | ---                                                                      | ---           | -3.40 | -5.35  | 1.57 | KO Increases WT Response ≥1.5-fold |
| 1456741_s_at | NM_153581       | 234267 | qlvcoo protein m6a                                                       | Gpm6a         | -3.53 | -6.03  | 1.71 | KO Increases WT Response ≥1.5-fold |
| 1438211_s_at | NM_016974       | 13170  | D site albumin promoter binding protein                                  | Dbp           | -3.54 | -7.25  | 2.05 | KO Increases WT Response ≥1.5-fold |
| 1418174_at   | NM_016974       | 13170  | D site albumin promoter binding protein                                  | Dbp           | -3.56 | -7.96  | 2.24 | KO Increases WT Response ≥1.5-fold |
| 1423085_at   | NM_007911       | 13643  | ephrin B3                                                                | Efnb3         | -3.61 | -5.53  | 1.53 | KO Increases WT Response ≥1.5-fold |
| 1445764_at   | ---             | ---    | PREDICTED: Mus musculus hypothetical protein LOC628151 (LOC628151), mRNA | ---           | -3.69 | -6.94  | 1.88 | KO Increases WT Response ≥1.5-fold |
| 1443866_at   | NM_176920       | 319476 | leucine-rich repeats and transmembrane domains 1                         | Lrtm1         | -4.18 | -7.77  | 1.86 | KO Increases WT Response ≥1.5-fold |
| 1429021_at   | NM_007936       | 13838  | Eph receptor A4                                                          | Epha4         | -4.42 | -8.46  | 1.91 | KO Increases WT Response ≥1.5-fold |
| 1439658_at   | // XM_916258 // | 320502 | leiomodin 3 (fetal)                                                      | Lmod3         | -5.08 | -8.68  | 1.91 | KO Increases WT Response ≥1.5-fold |
| 1444429_at   | NM_176920       | 319476 | leucine-rich repeats and transmembrane domains 1                         | Lrtm1         | -5.61 | -8.91  | 1.53 | KO Increases WT Response ≥1.5-fold |
| 1446771_at   | ---             | ---    | ---                                                                      | ---           | -6.42 | -10.41 | 1.62 | KO Increases WT Response ≥1.5-fold |
| 1418697_at   | NM_009349       | 21743  | indolethylamine N-methyltransferase                                      | Inmt          | -6.77 | -11.98 | 1.77 | KO Increases WT Response ≥1.5-fold |
| 1458345_s_at | NM_027866       | 71693  | collectin sub-family member 11                                           | Colec11       | -7.96 | -18.35 | 2.31 | KO Increases WT Response ≥1.5-fold |
| 1442033_at   | NM_183175       | 239126 | C1q and tumor necrosis factor related protein 9                          | C1qtnf9       | -8.25 | -14.2  | 1.72 | KO Increases WT Response ≥1.5-fold |



**TABLE S11** Cardiac toxicological functions for LPS responsive genes modified by  $\geq 1.5$ -fold (induction or repression) by A<sub>2A</sub>R KO

| Category                                                                                | P-value           | Genes                                                                                                                                                                                               |
|-----------------------------------------------------------------------------------------|-------------------|-----------------------------------------------------------------------------------------------------------------------------------------------------------------------------------------------------|
| <b>Responses enhanced by A<sub>2A</sub>R KO (countered by A<sub>2A</sub>R activity)</b> |                   |                                                                                                                                                                                                     |
| <i>Cardiac Dysfunction</i>                                                              | 1.0E-04 - 1.0E-04 | <i>Angptl4, Abcc8, Serpine1, Ppargc1a</i>                                                                                                                                                           |
| <i>Heart Failure</i>                                                                    | 5.6E-04 - 9.3E-02 | <i>Ca7, Pln, Kcnk3, Ca4, Dicer1, Il6, Pde4b, Serpine1, Nr3c1, Ppargc1a</i>                                                                                                                          |
| <i>Cardiac Hypertrophy</i>                                                              | 9.1E-04 - 4.0E-01 | <i>Atf3, Pln, Pfkfb1, Pik3r1, Cdkn1a, Abcc8, Dnajc3, Il6, Csf3, Serpine1, Slc2a4, Ppargc1a</i>                                                                                                      |
| <i>Tachycardia</i>                                                                      | 1.3E-03 - 4.5E-01 | <i>Kitlg, Ca7, Ptgfr, Kcnk3, Ca4, Csf3</i>                                                                                                                                                          |
| <i>Cardiac Infarction</i>                                                               | 1.5E-03 - 8.2E-03 | <i>Kcnk3, Selp, Il6, Csf3, Serpine1, Itgb3</i>                                                                                                                                                      |
| <i>Cardiac Output</i>                                                                   | 6.0E-03 - 6.0E-03 | <i>Kitlg, Csf3</i>                                                                                                                                                                                  |
| <i>Congestive Cardiac Failure</i>                                                       | 1.8E-02 - 1.8E-02 | <i>Kcnk3, Il6, Pde4b, Nr3c1</i>                                                                                                                                                                     |
| <i>Cardiac Fibrosis</i>                                                                 | 2.2E-02 - 2.7E-01 | <i>Pln, Atf3, Csf3, Serpine1</i>                                                                                                                                                                    |
| <i>Cardiac Damage</i>                                                                   | 3.0E-02 - 1.8E-01 | <i>Atf4, Serpine1</i>                                                                                                                                                                               |
| <i>Cardiac Stenosis</i>                                                                 | 3.0E-02 - 1.3E-01 | <i>Ldlr, Abcc8</i>                                                                                                                                                                                  |
| <i>Cardiac Arteriopathy</i>                                                             | 4.5E-02 - 5.8E-02 | <i>A2bp1, Il6, Nr3c1, Amotl1, Tuba8, Rin3, Arhgap20, Serpine1, Col4a1, Daam1, Qsox1, Mlf1, Pde4b, C10orf107, Tbc1d4, Itgb3, Ldlr, Selp, Fam13c, Gpm6a, Reg3g, Magi2, Osbpl3, Prickle1, Ppargc1a</i> |
| <i>Cardiac Necrosis/Cell Death</i>                                                      | 4.8E-02 - 2.5E-01 | <i>Cdkn1a, Il6, Csf3, Stat1, Ppargc1a</i>                                                                                                                                                           |
| <i>Cardiac Arrhythmia</i>                                                               | 5.7E-02 - 4.0E-01 | <i>Arntl, Kcnk3, Kcnip2</i>                                                                                                                                                                         |
| <i>Cardiac Proliferation</i>                                                            | 3.0E-01 - 3.0E-01 | <i>Csf3</i>                                                                                                                                                                                         |
| <i>Cardiac Dilatation</i>                                                               | 3.9E-01 - 3.9E-01 | <i>Serpine1</i>                                                                                                                                                                                     |
| <b>Responses inhibited by A<sub>2A</sub>R KO (promoted by A<sub>2A</sub>R activity)</b> |                   |                                                                                                                                                                                                     |
| <i>Cardiac Damage</i>                                                                   | 1.2E-02 - 8.2E-02 | <i>Hmox1, Adipoq</i>                                                                                                                                                                                |
| <i>Cardiac Proliferation</i>                                                            | 1.3E-02 - 1.3E-02 | <i>Adipoq</i>                                                                                                                                                                                       |
| <i>Heart Failure</i>                                                                    | 2.1E-02 - 3.3E-01 | <i>Ca3, Cacna2d1</i>                                                                                                                                                                                |
| <i>Cardiac Necrosis/Cell Death</i>                                                      | 3.1E-02 - 8.8E-02 | <i>Adipoq, Slc8a1</i>                                                                                                                                                                               |
| <i>Cardiac Arrhythmia</i>                                                               | 3.3E-02 - 3.3E-02 | <i>Tbx3</i>                                                                                                                                                                                         |
| <i>Cardiac Infarction</i>                                                               | 3.3E-02 - 3.3E-02 | <i>Adipoq</i>                                                                                                                                                                                       |
| <i>Cardiac Hypertrophy</i>                                                              | 8.8E-02 - 4.5E-01 | <i>Hmox1, Hck, Fbxo32</i>                                                                                                                                                                           |
| <i>Cardiac Dilatation</i>                                                               | 1.1E-01 - 1.1E-01 | <i>Sdc1</i>                                                                                                                                                                                         |
| <i>Cardiac Arteriopathy</i>                                                             | 1.6E-01 - 1.6E-01 | <i>Iqgap2, Shroom3, Sema5a, Cacna2d1, Adipoq, Hivep3, Reln, Nsmce1, Msi2, Plxdc2</i>                                                                                                                |
| <i>Cardiac Stenosis</i>                                                                 | 2.4E-01 - 2.4E-01 | <i>Vcam1</i>                                                                                                                                                                                        |
| <i>Tachycardia</i>                                                                      | 4.8E-01 - 4.8E-01 | <i>Ca3</i>                                                                                                                                                                                          |

Toxicological functional groupings of LPS-responsive cardiac transcripts modified by A<sub>2A</sub>R KO (enhanced or repressed) by a factor of  $\geq 1.5$ -fold. Groups derived from IPA analysis are ranked according to P-value ranges determined by a Fisher's Exact Test.
